# Supplementary material for: A process-based anatomy of Mediterranean cyclones: from baroclinic lows to tropical-like systems
Source: Copernicus journal article supplement (doi:10.5194/wcd-2-255-2021), 2021-03-29

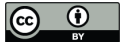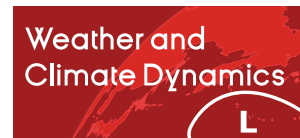

Open Access

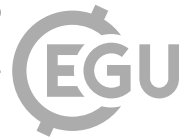

*Supplement of*

## **A process-based anatomy of Mediterranean cyclones: from baroclinic lows to tropical-like systems**

**Emmanouil Flaounas et al.**

*Correspondence to:* Emmanouil Flaounas ([emmanouil.flounas@env.ethz.ch](mailto:emmanouil.flounas@env.ethz.ch))

The copyright of individual parts of the supplement might differ from the article licence.



Case-1; Date: 23/3/2016

Colour: Relative vorticity ( $\times 10^{-5}$ ) | Contour: SLP (from 1018 hPa with an interval of 2 hPa)

Thick contours: 990, 1000 and 1010 hPa of SLP | Magenta dot: cyclone centre

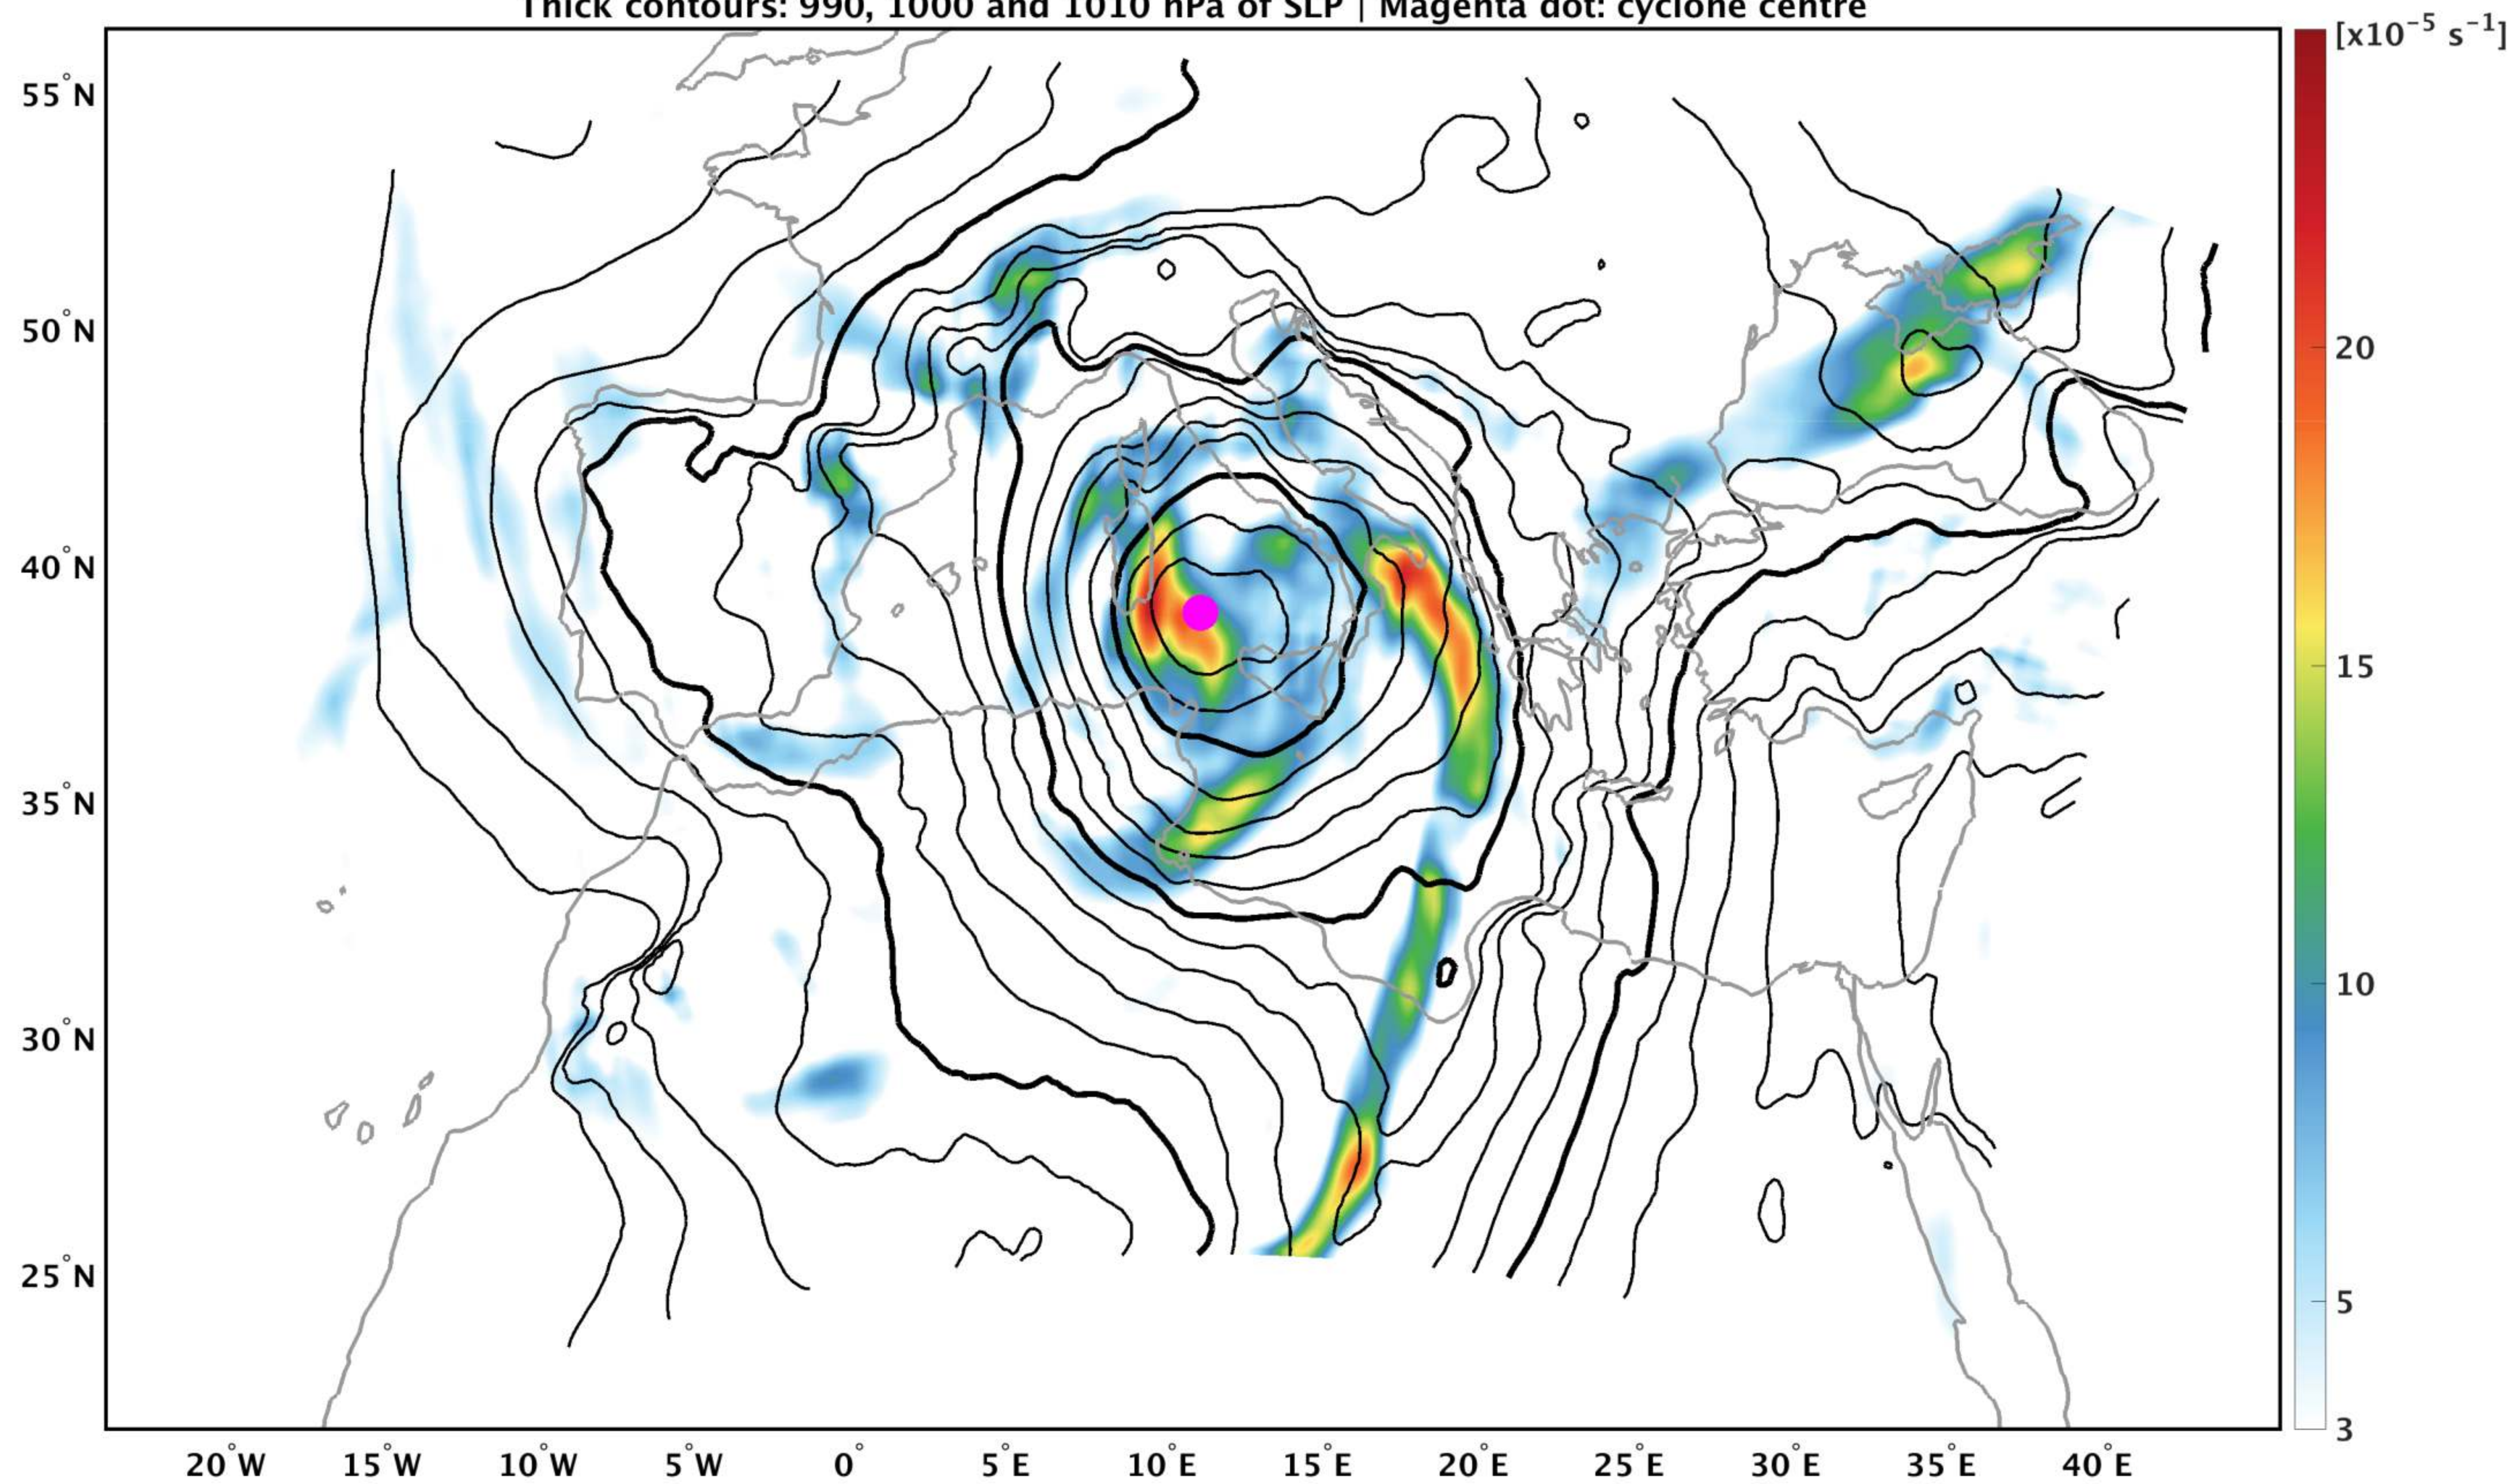



Case-2; Date: 29/2/2016

Colour: Relative vorticity ( $\times 10^{-5}$ ) | Contour: SLP (from 1018 hPa with an interval of 2 hPa)

Thick contours: 990, 1000 and 1010 hPa of SLP | Magenta dot: cyclone centre

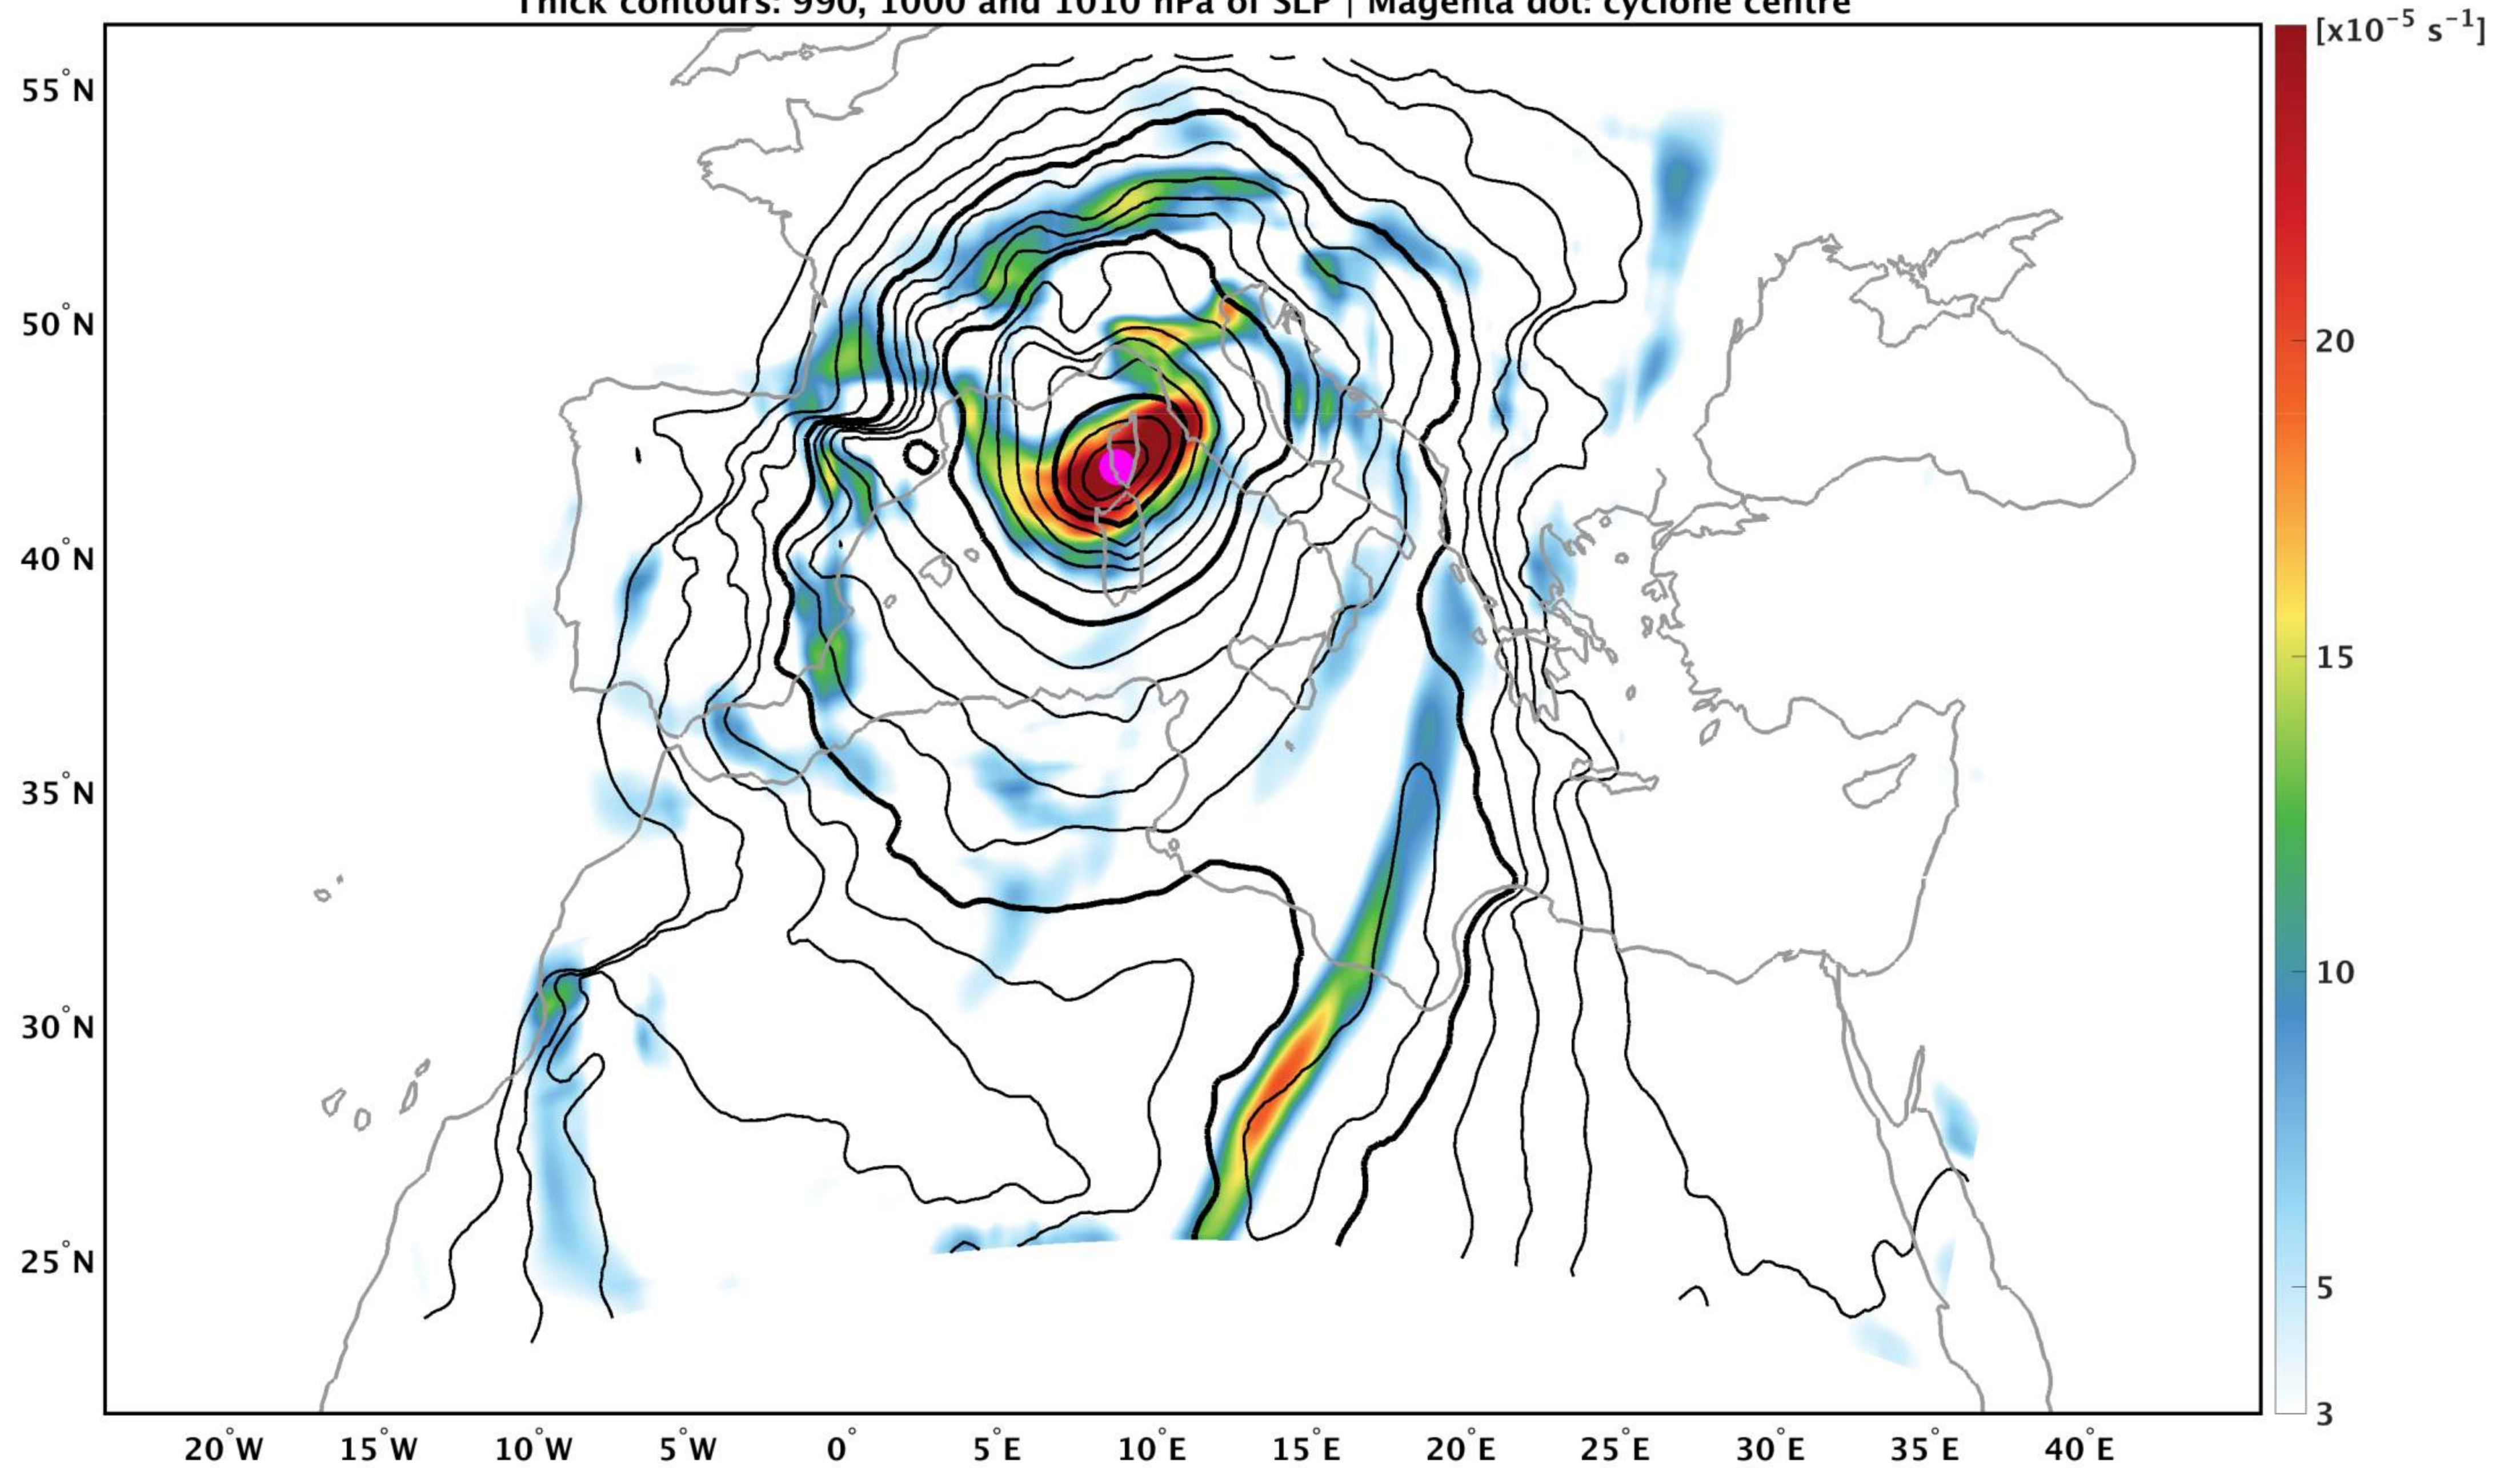



Case-3; Date: 6/2/2015

Colour: Relative vorticity ( $\times 10^{-5}$ ) | Contour: SLP (from 1018 hPa with an interval of 2 hPa)

Thick contours: 990, 1000 and 1010 hPa of SLP | Magenta dot: cyclone centre

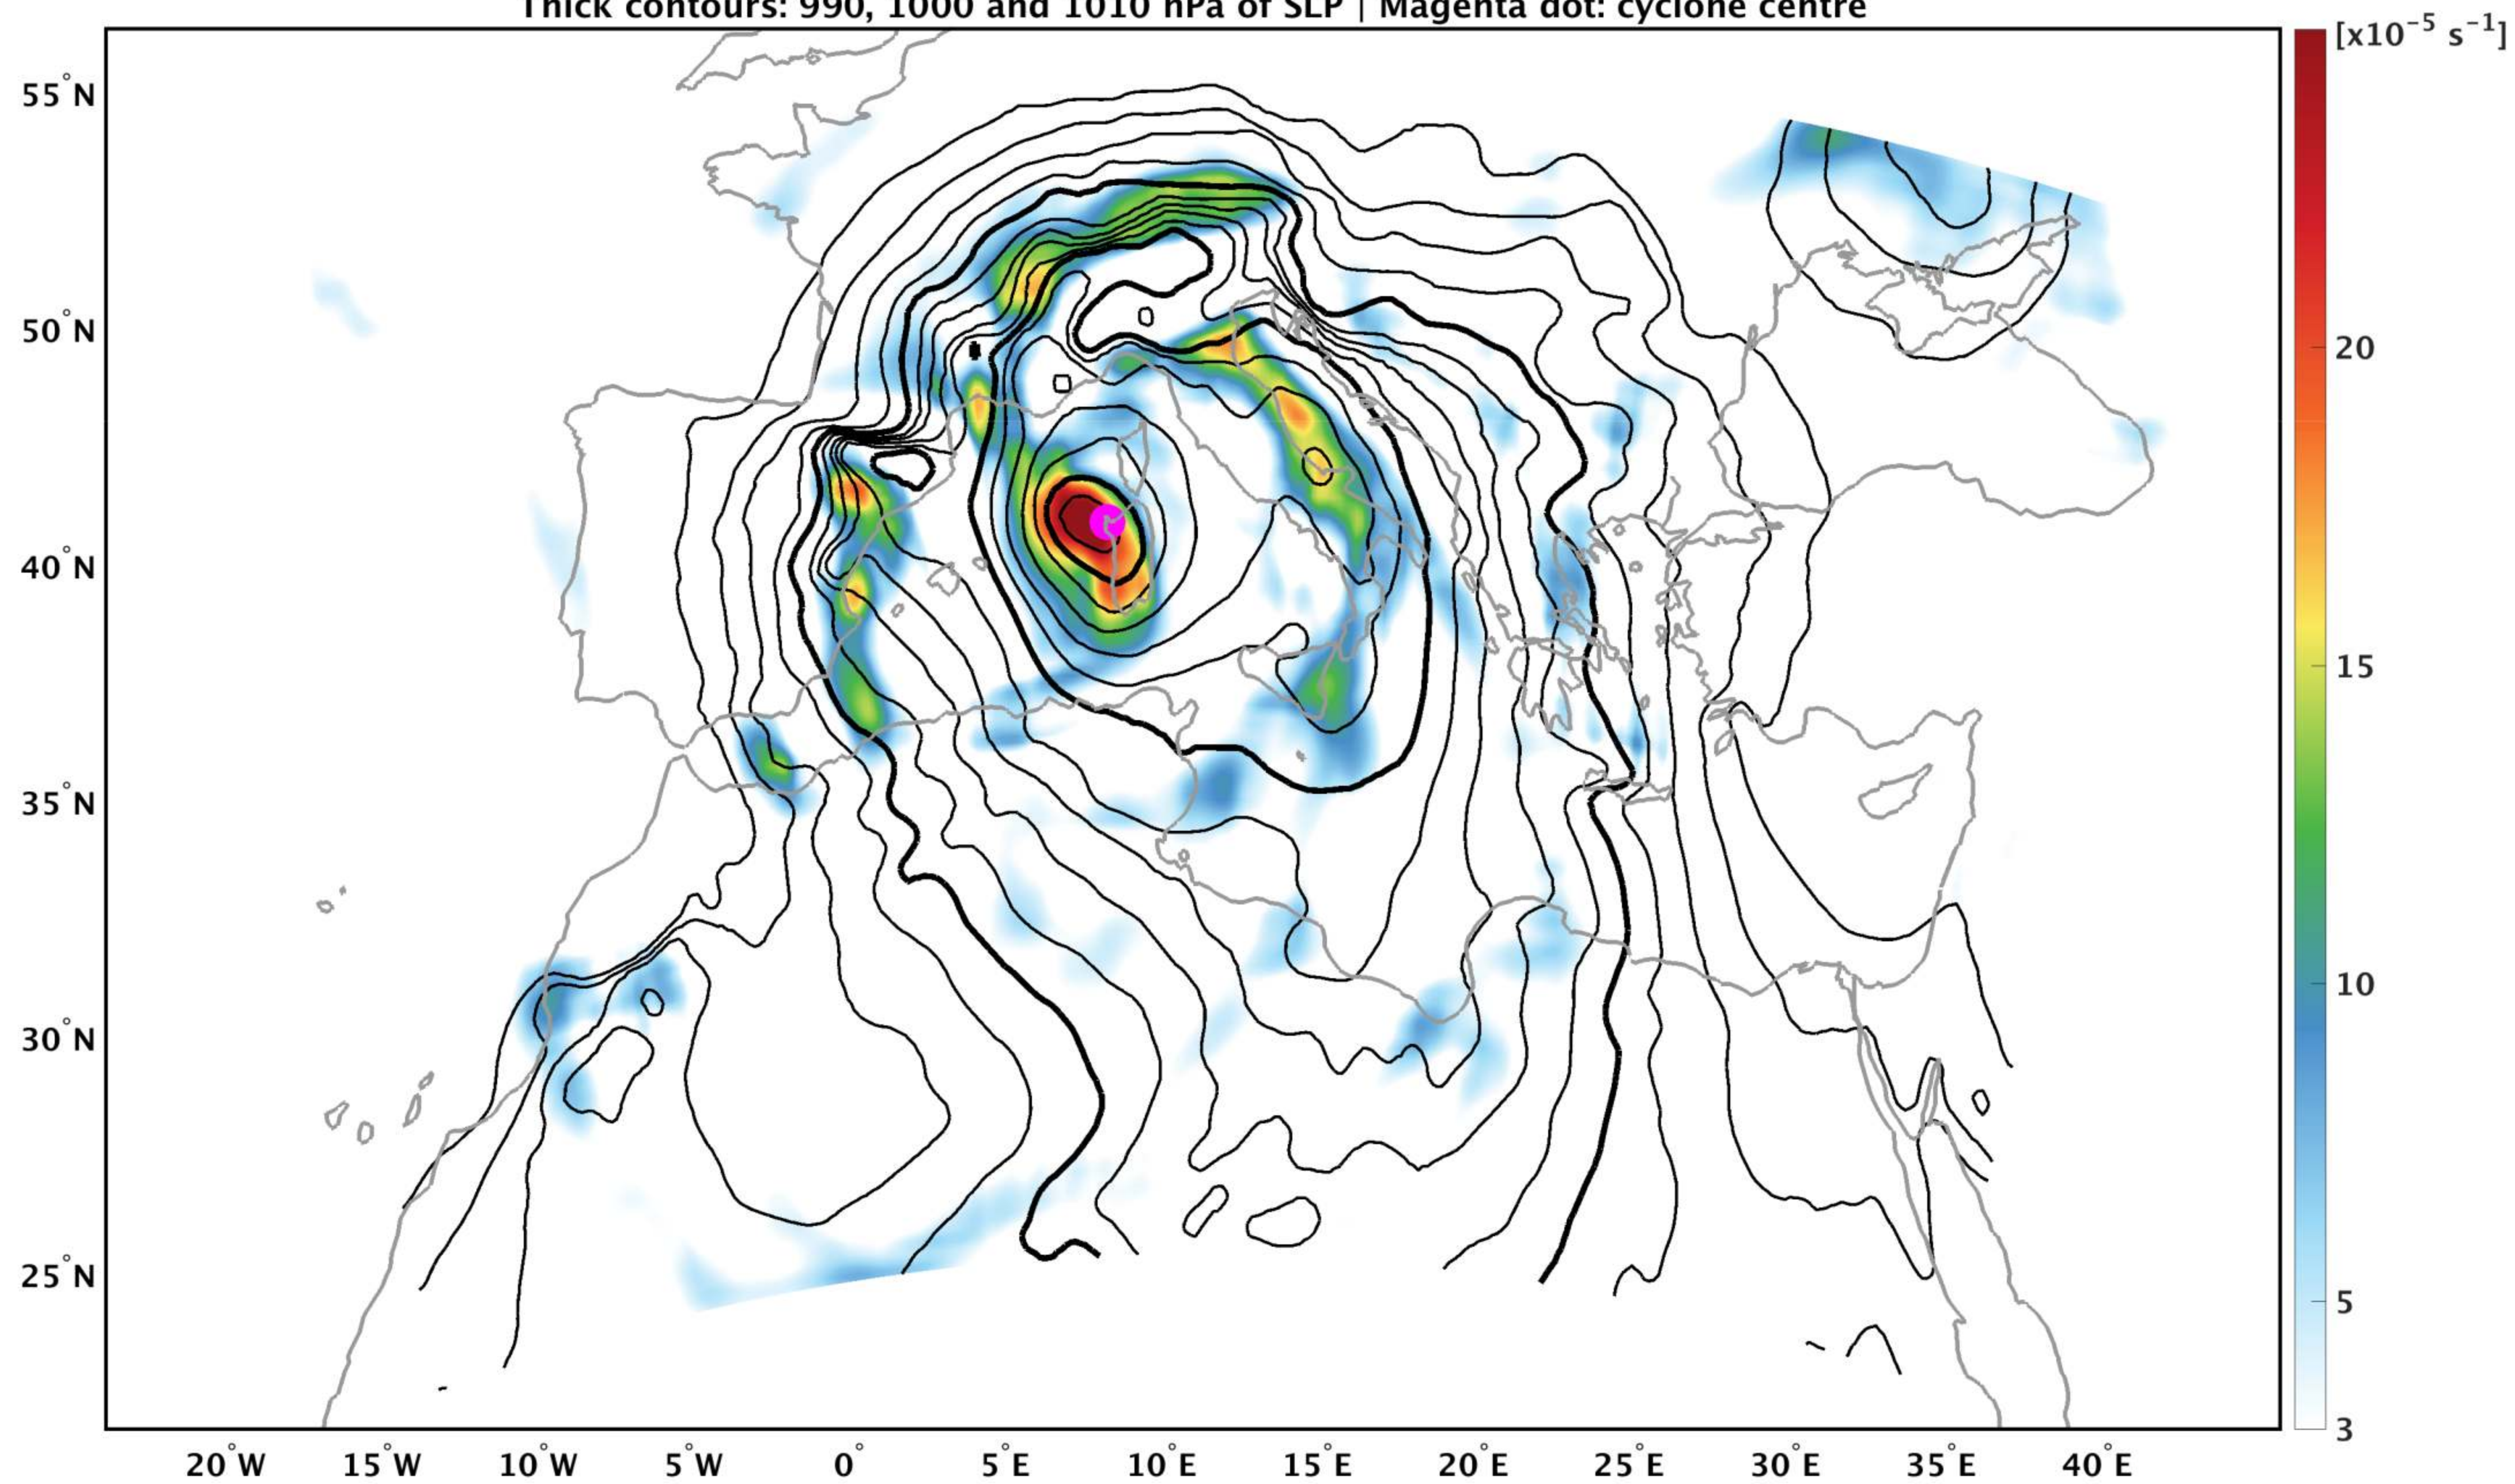



Case-4; Date: 7/2/2012

Colour: Relative vorticity ( $\times 10^{-5}$ ) | Contour: SLP (from 1018 hPa with an interval of 2 hPa)

Thick contours: 990, 1000 and 1010 hPa of SLP | Magenta dot: cyclone centre

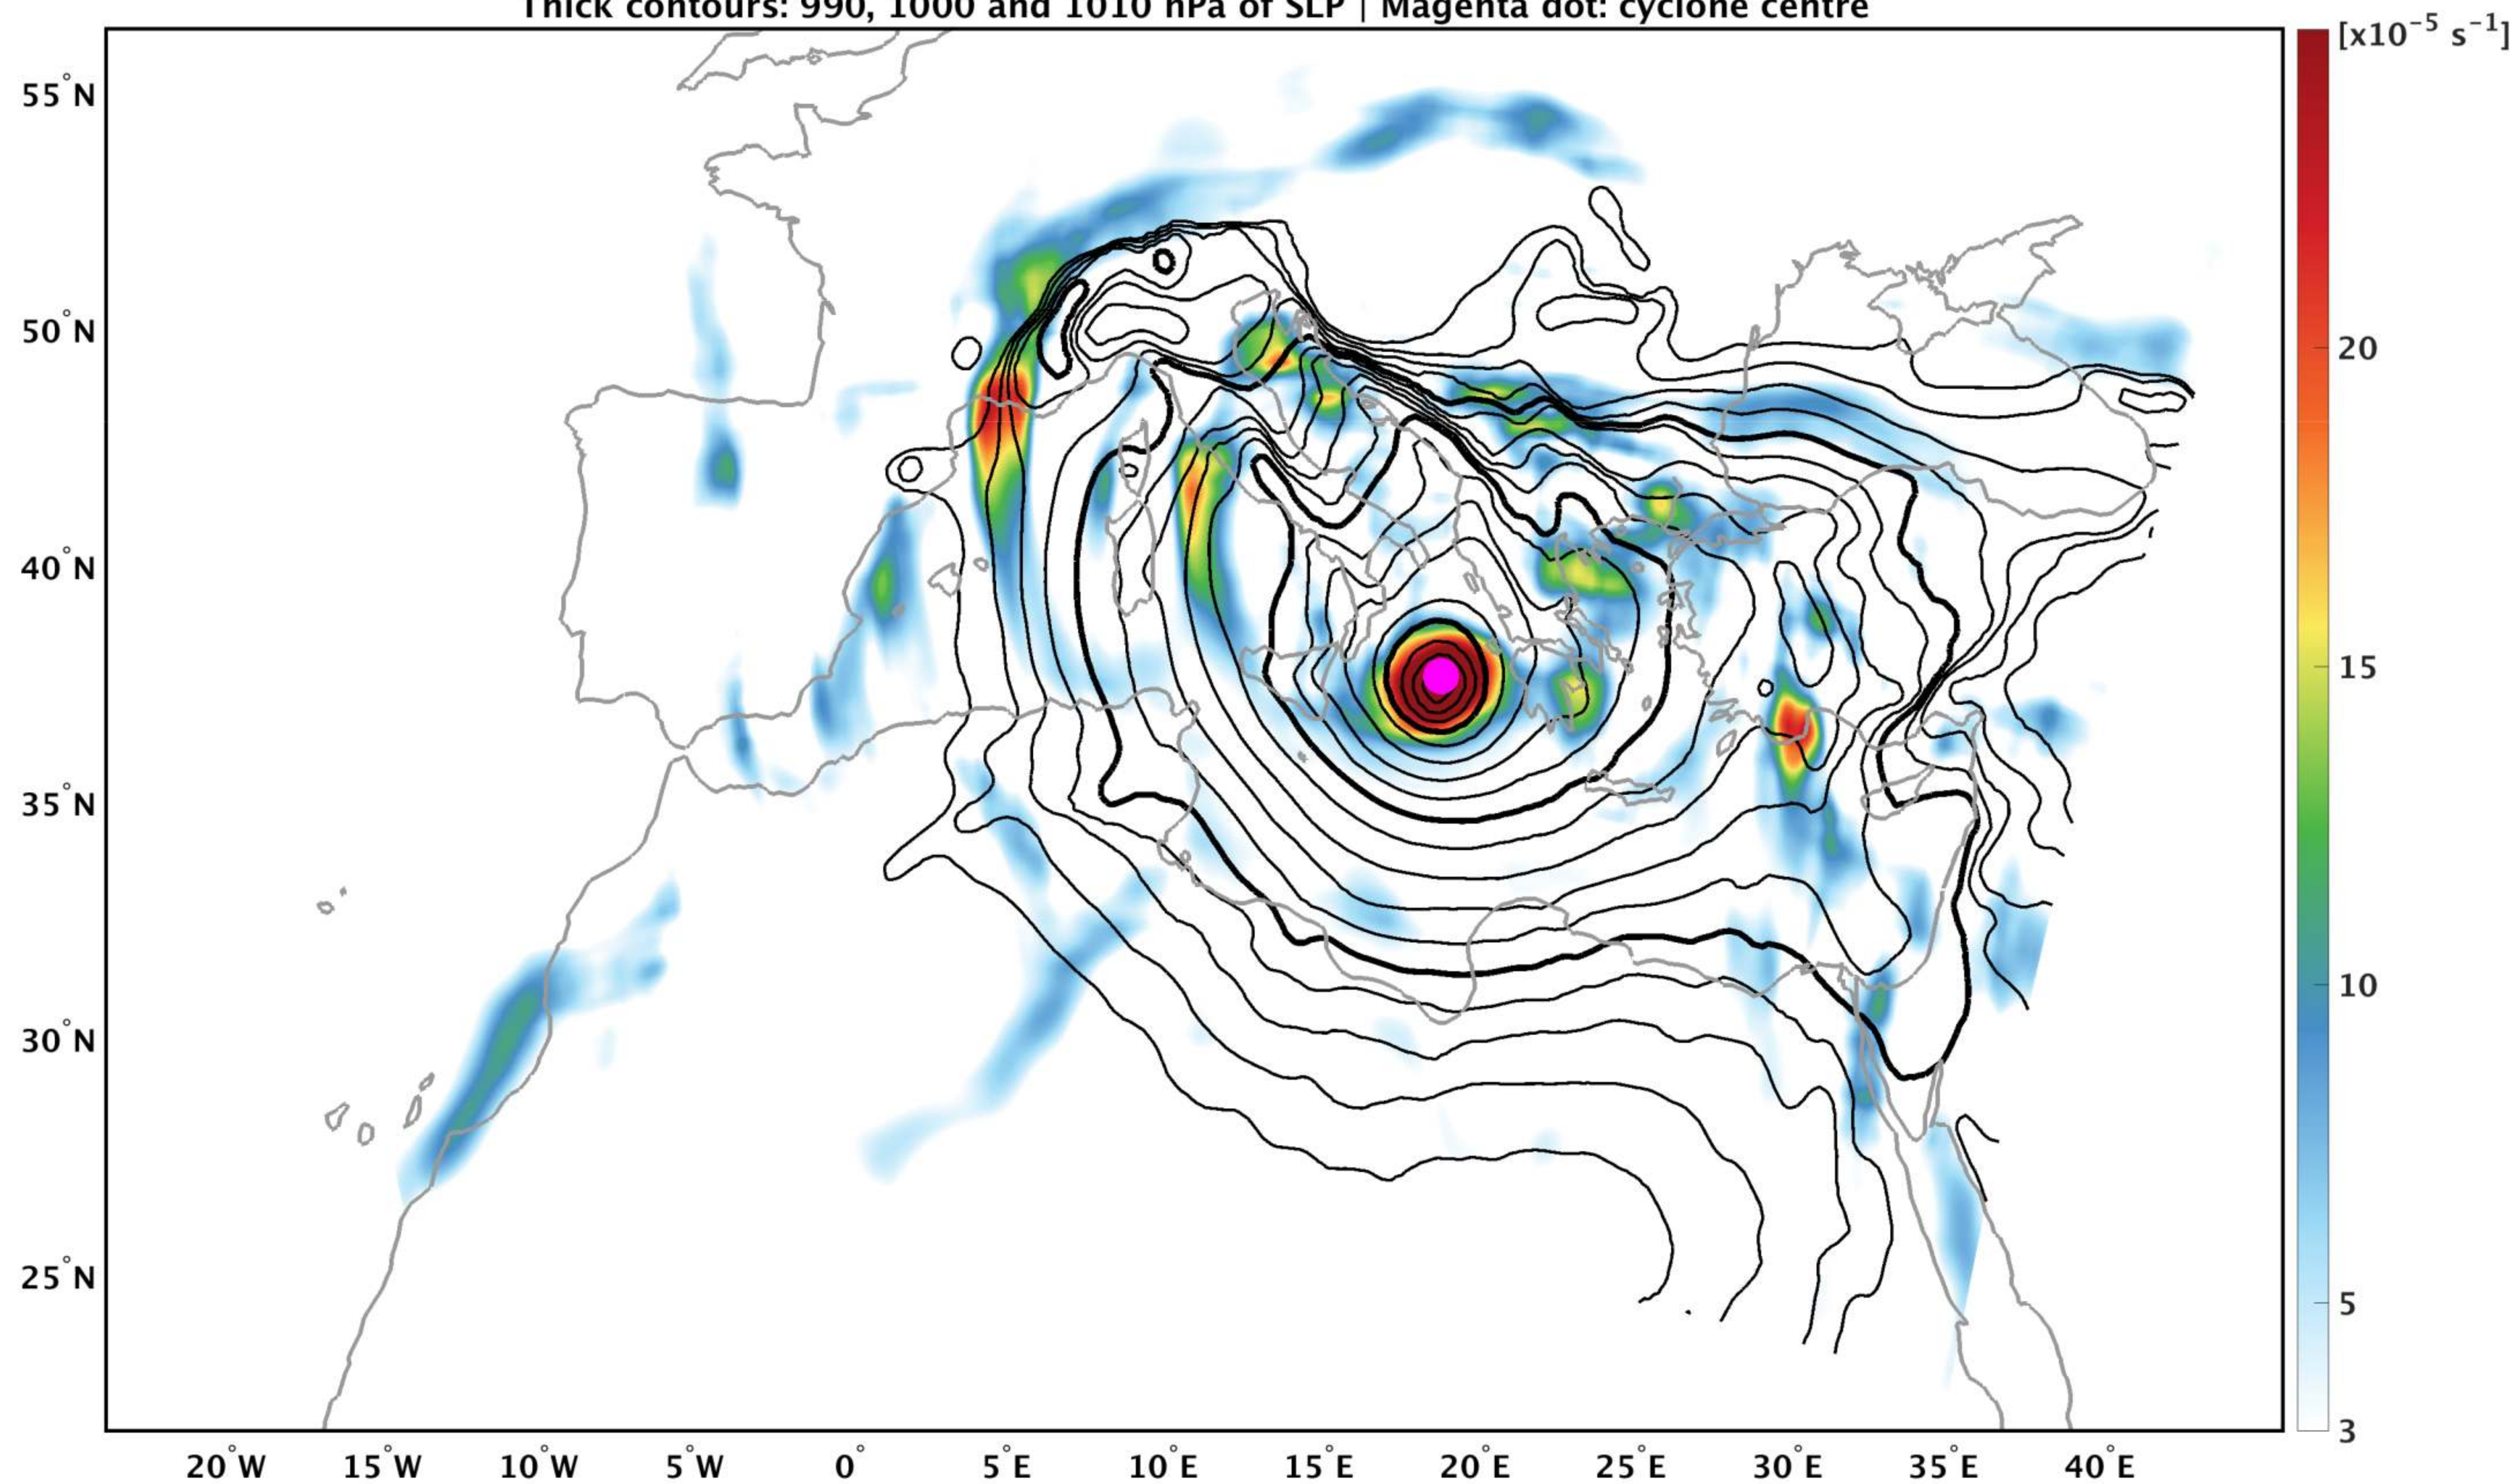



Case-5; Date: 18/2/2011

Colour: Relative vorticity ( $\times 10^{-5}$ ) | Contour: SLP (from 1018 hPa with an interval of 2 hPa)

Thick contours: 990, 1000 and 1010 hPa of SLP | Magenta dot: cyclone centre

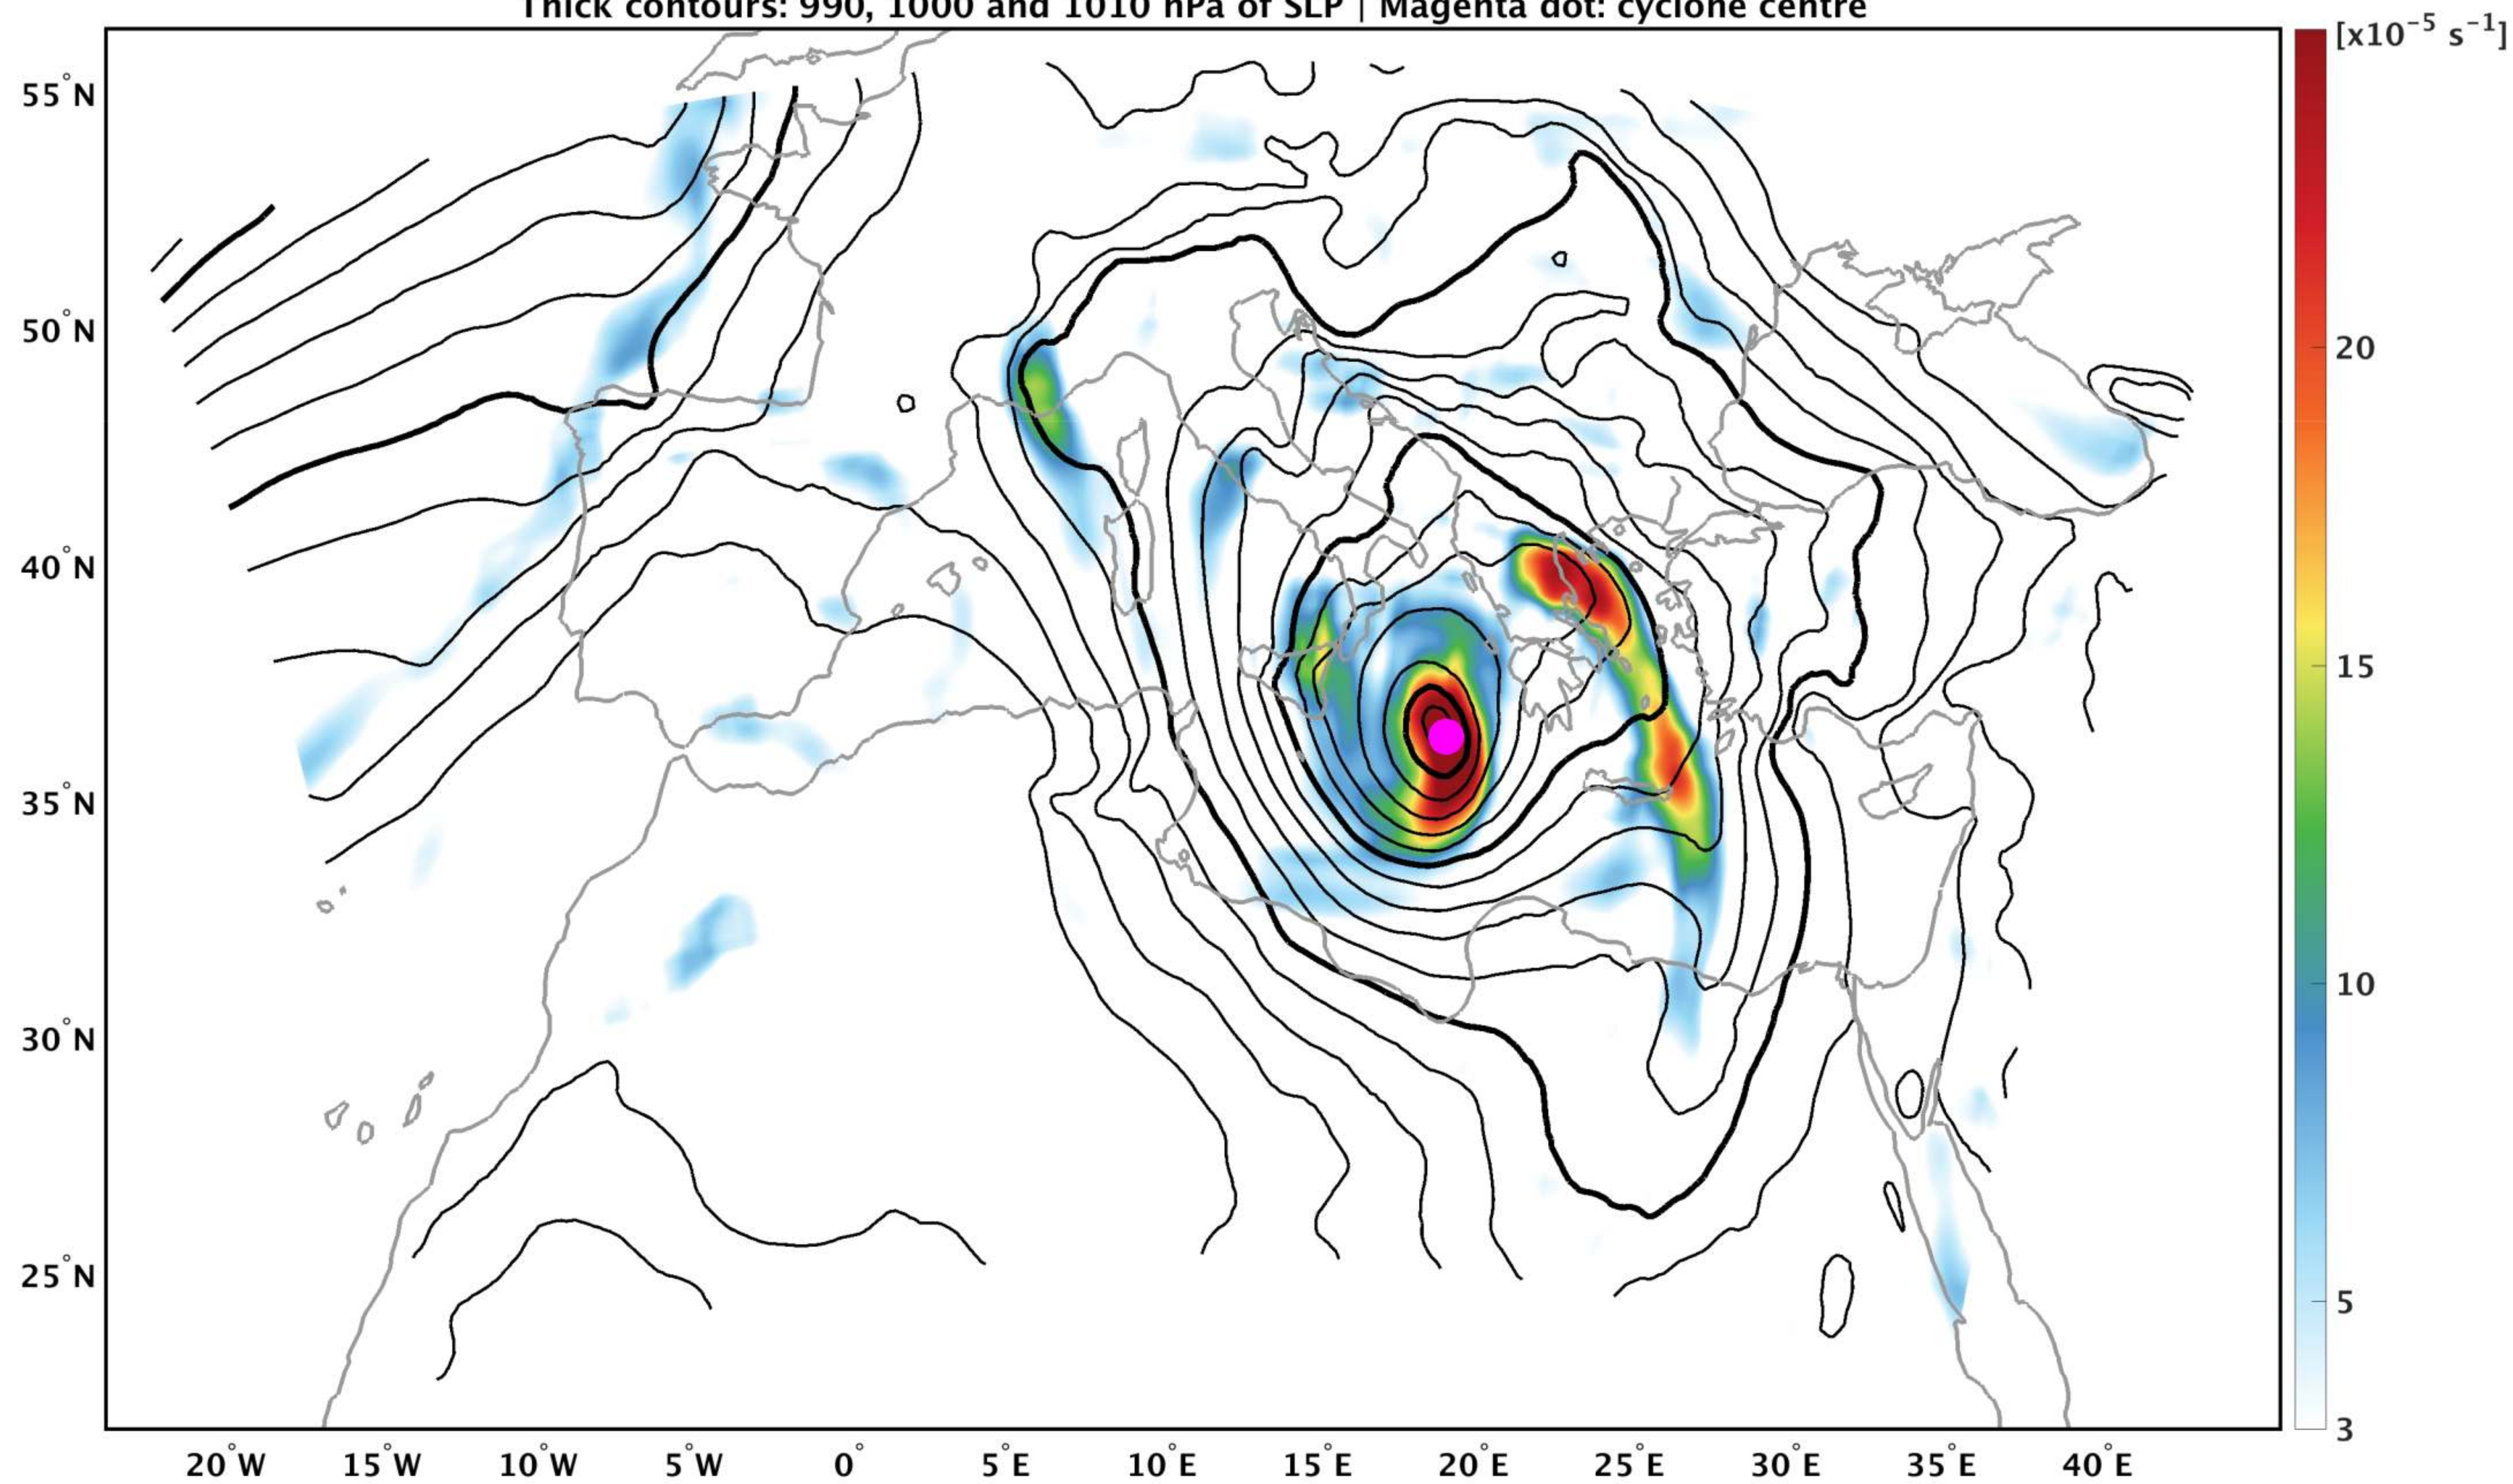



Case-6; Date: 12/4/2009

Colour: Relative vorticity ( $\times 10^{-5}$ ) | Contour: SLP (from 1018 hPa with an interval of 2 hPa)

Thick contours: 990, 1000 and 1010 hPa of SLP | Magenta dot: cyclone centre

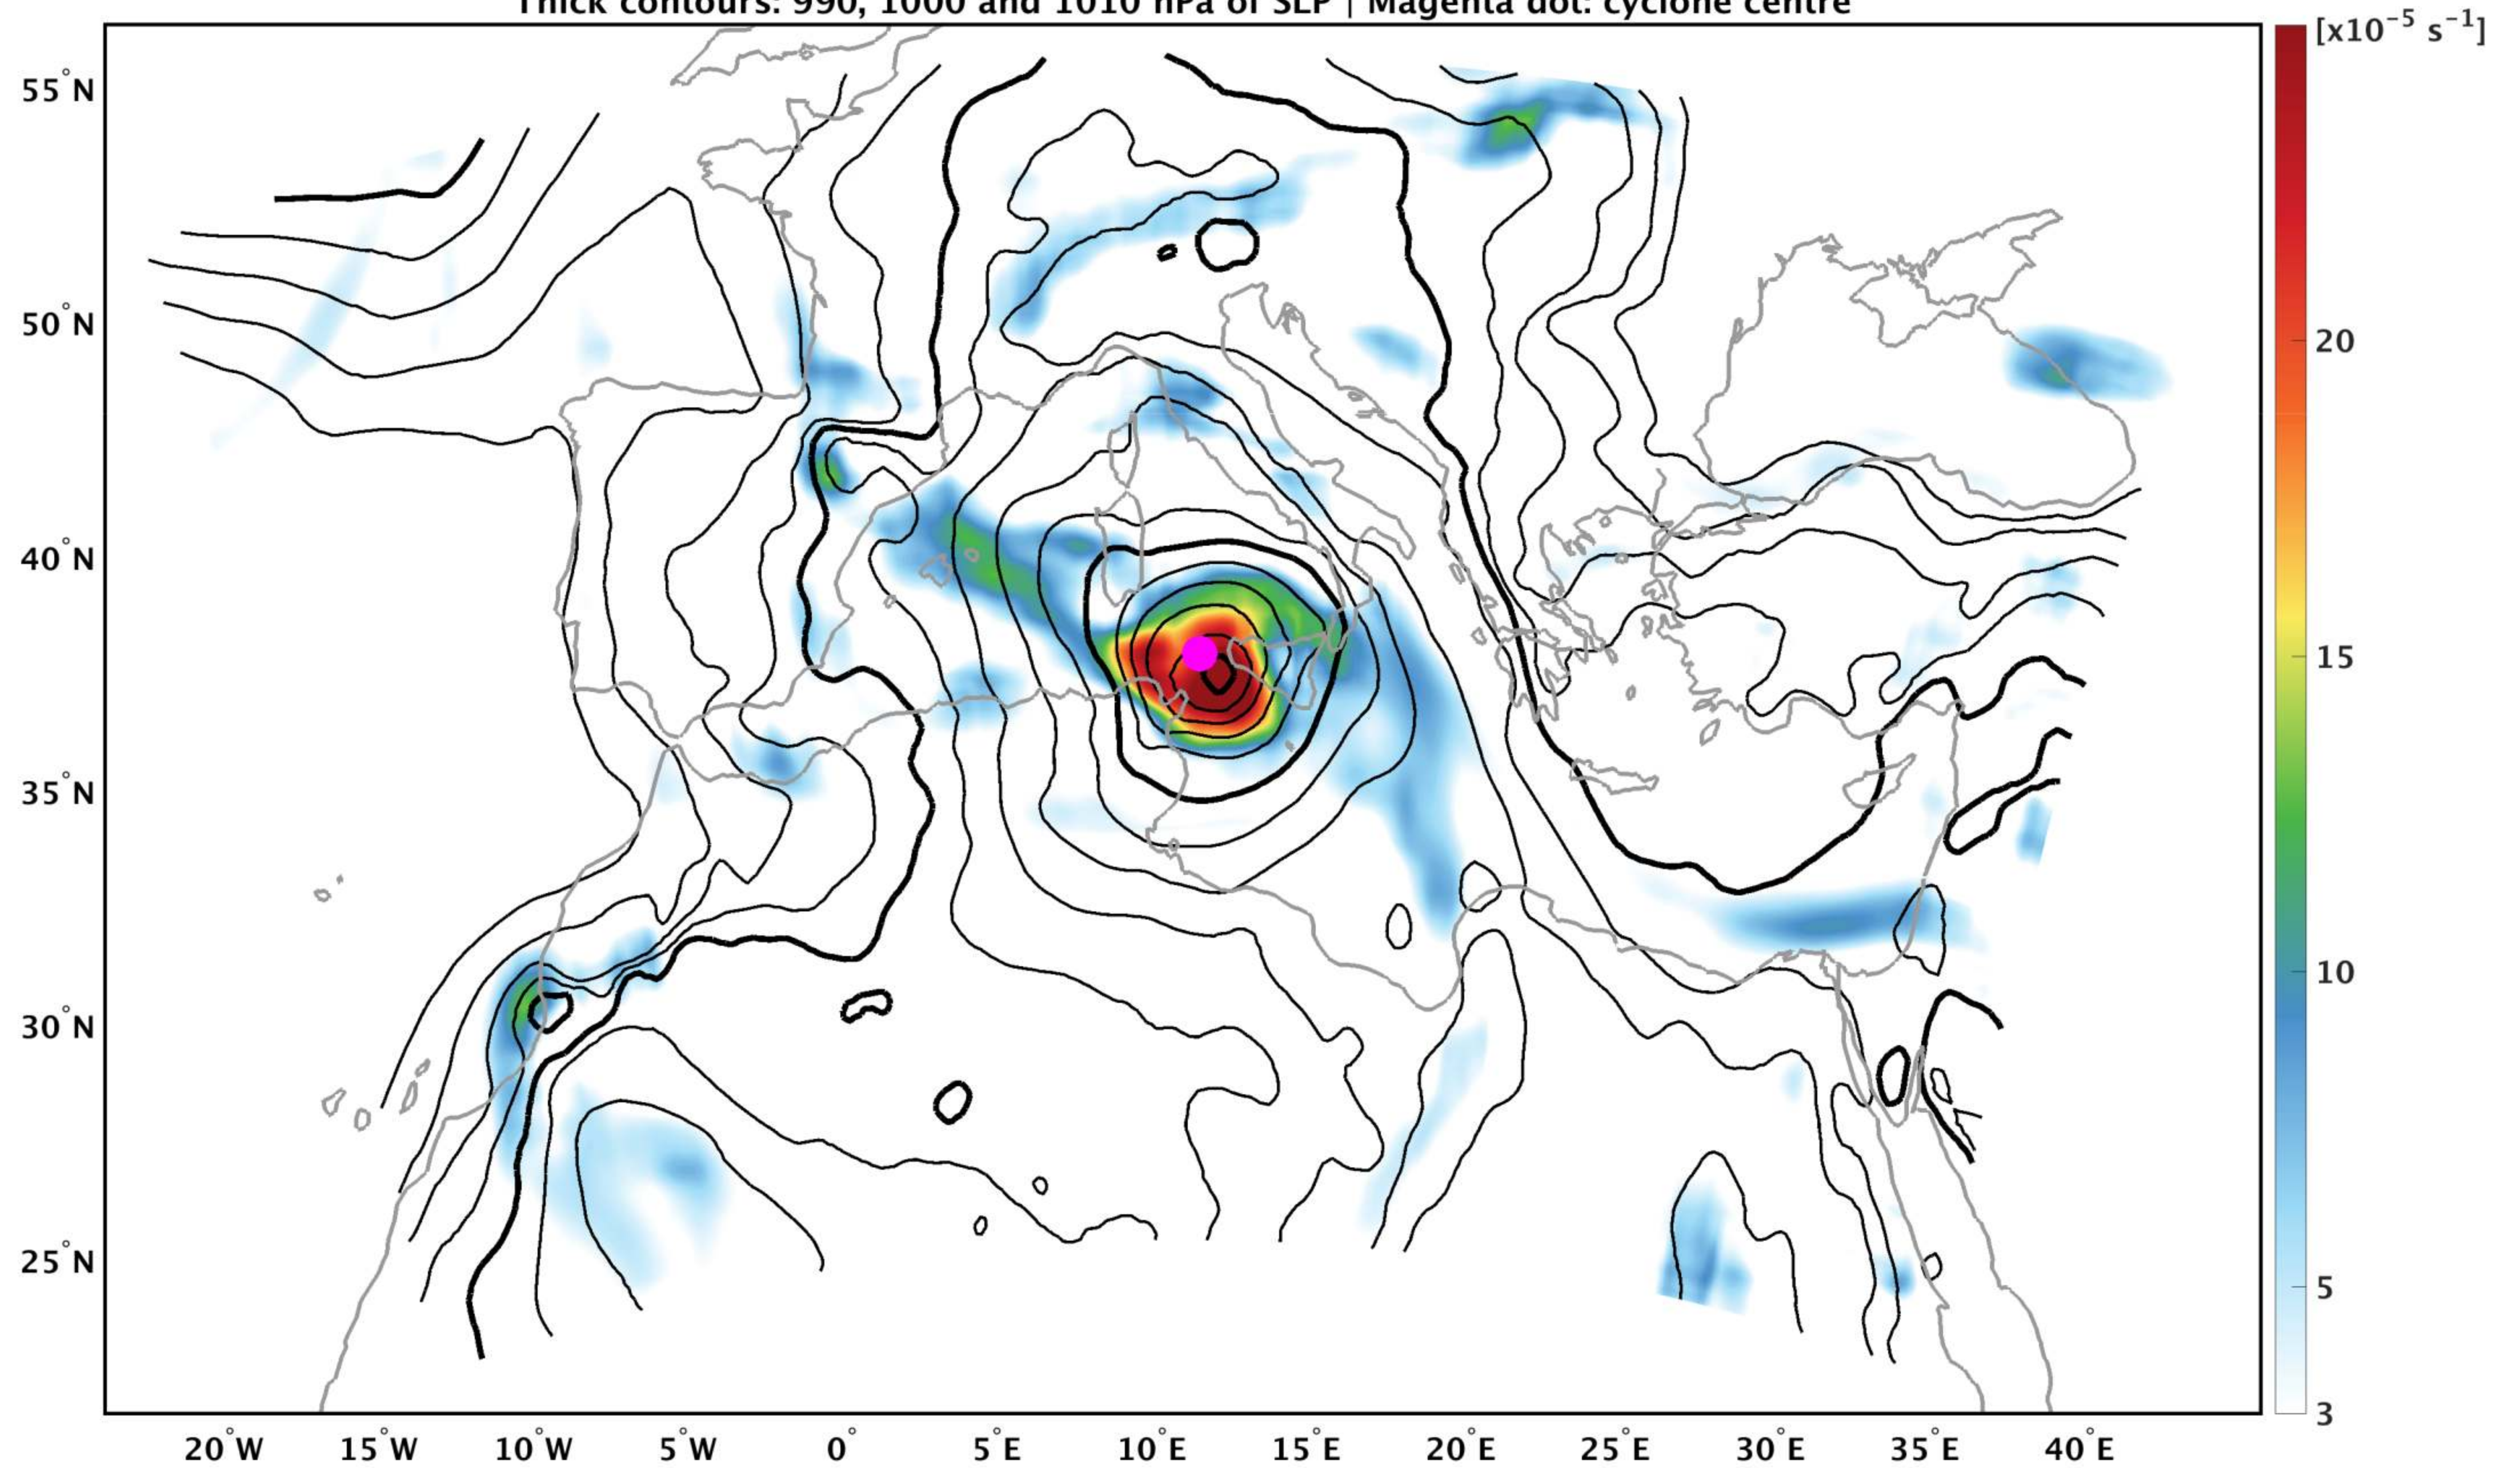



Case-7; Date: 6/11/2011

Colour: Relative vorticity ( $\times 10^{-5}$ ) | Contour: SLP (from 1018 hPa with an interval of 2 hPa)

Thick contours: 990, 1000 and 1010 hPa of SLP | Magenta dot: cyclone centre

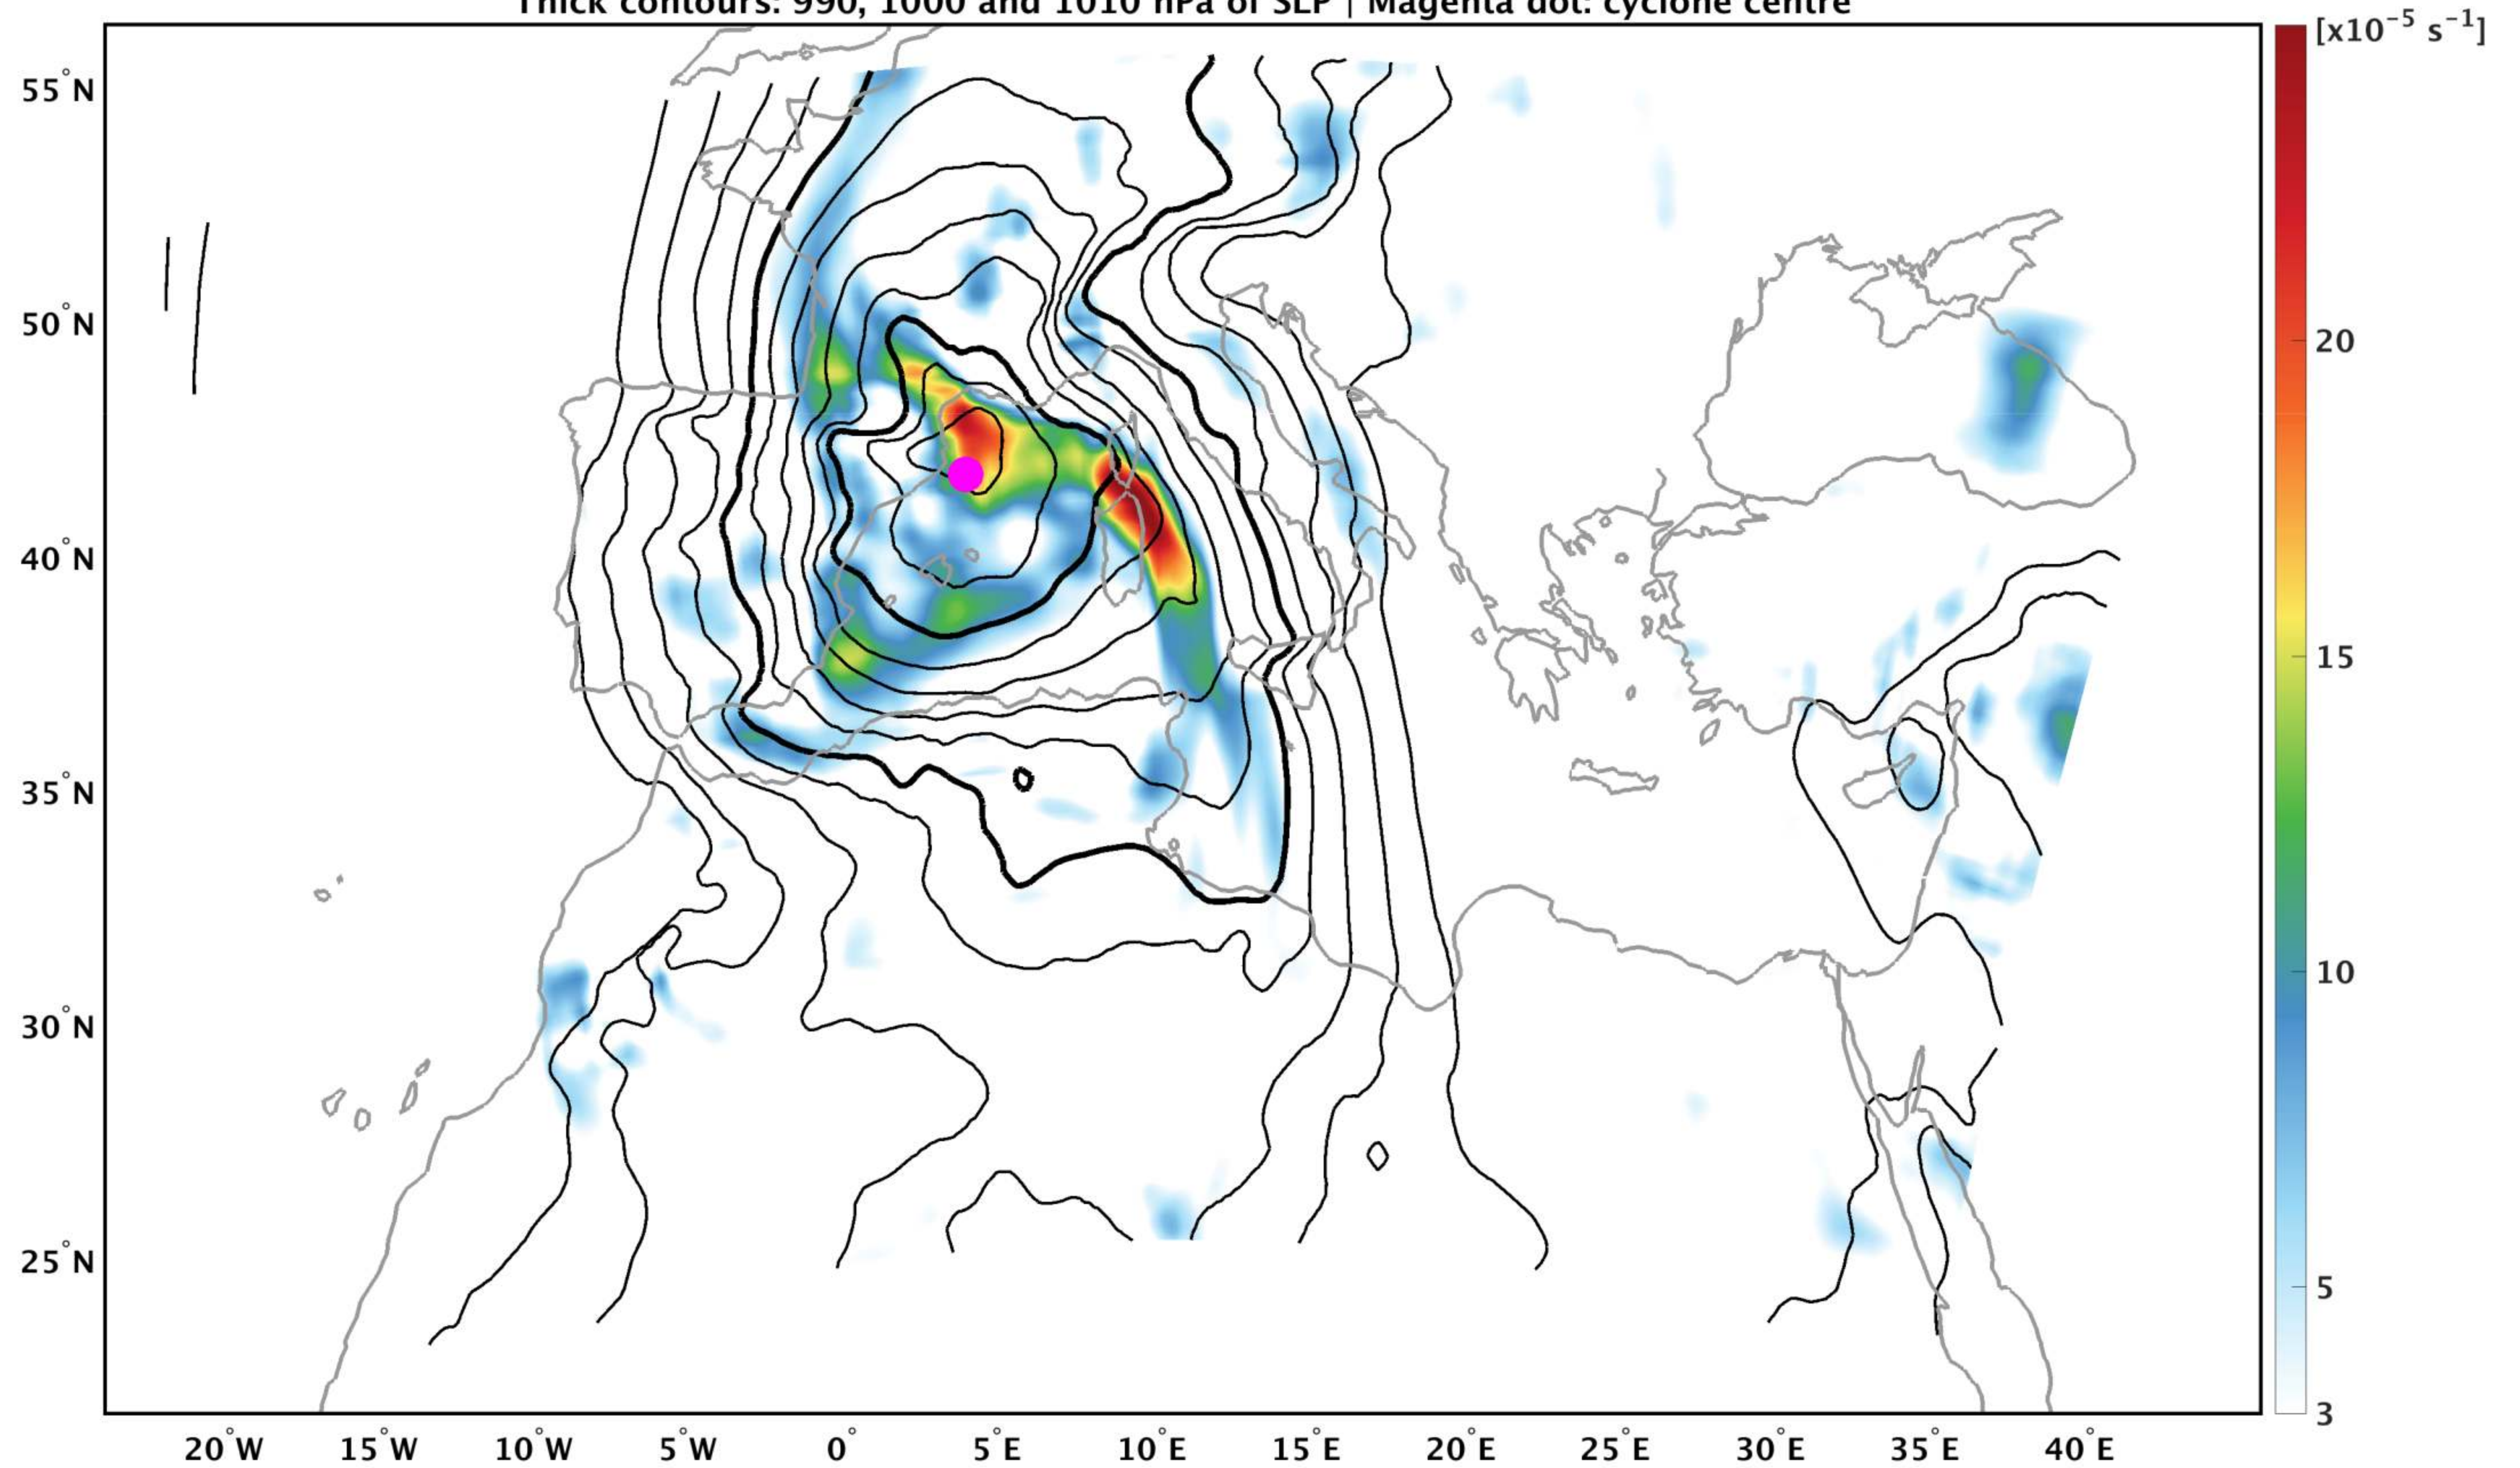



Case-8; Date: 23/10/2009

Colour: Relative vorticity ( $\times 10^{-5}$ ) | Contour: SLP (from 1018 hPa with an interval of 2 hPa)

Thick contours: 990, 1000 and 1010 hPa of SLP | Magenta dot: cyclone centre

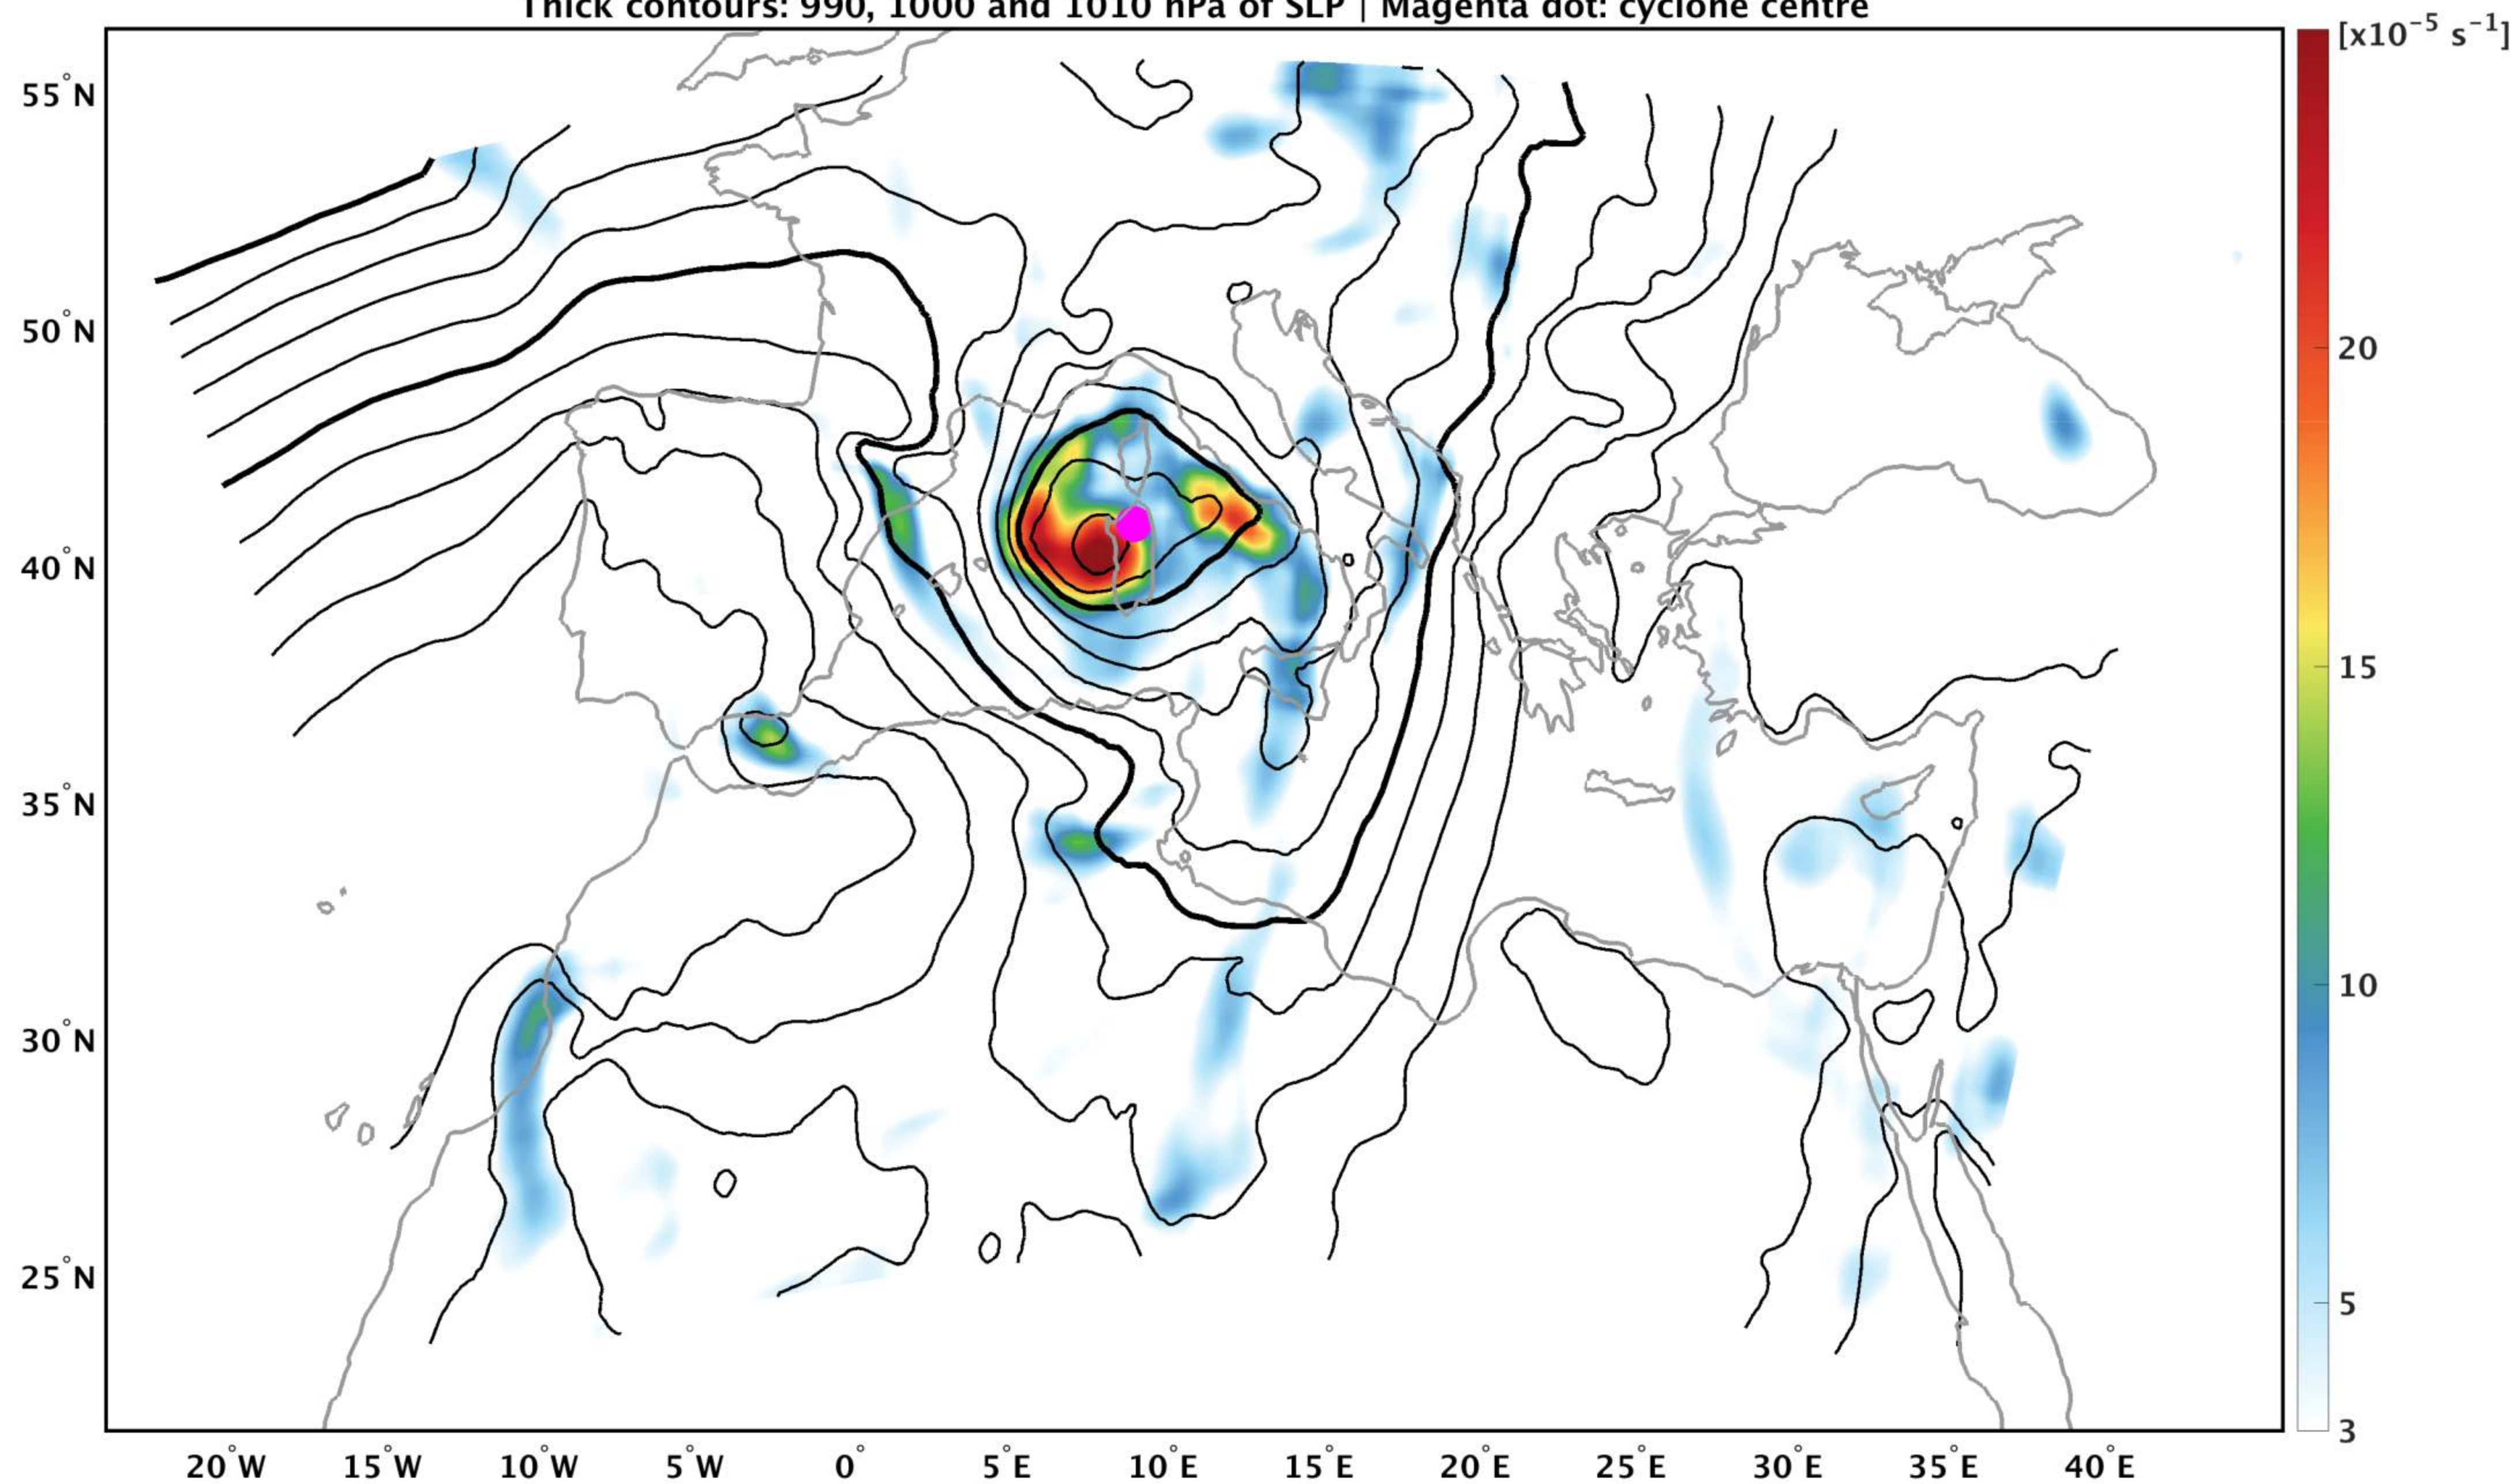



Case-9; Date: 21/1/2017

Colour: Relative vorticity ( $\times 10^{-5}$ ) | Contour: SLP (from 1018 hPa with an interval of 2 hPa)

Thick contours: 990, 1000 and 1010 hPa of SLP | Magenta dot: cyclone centre

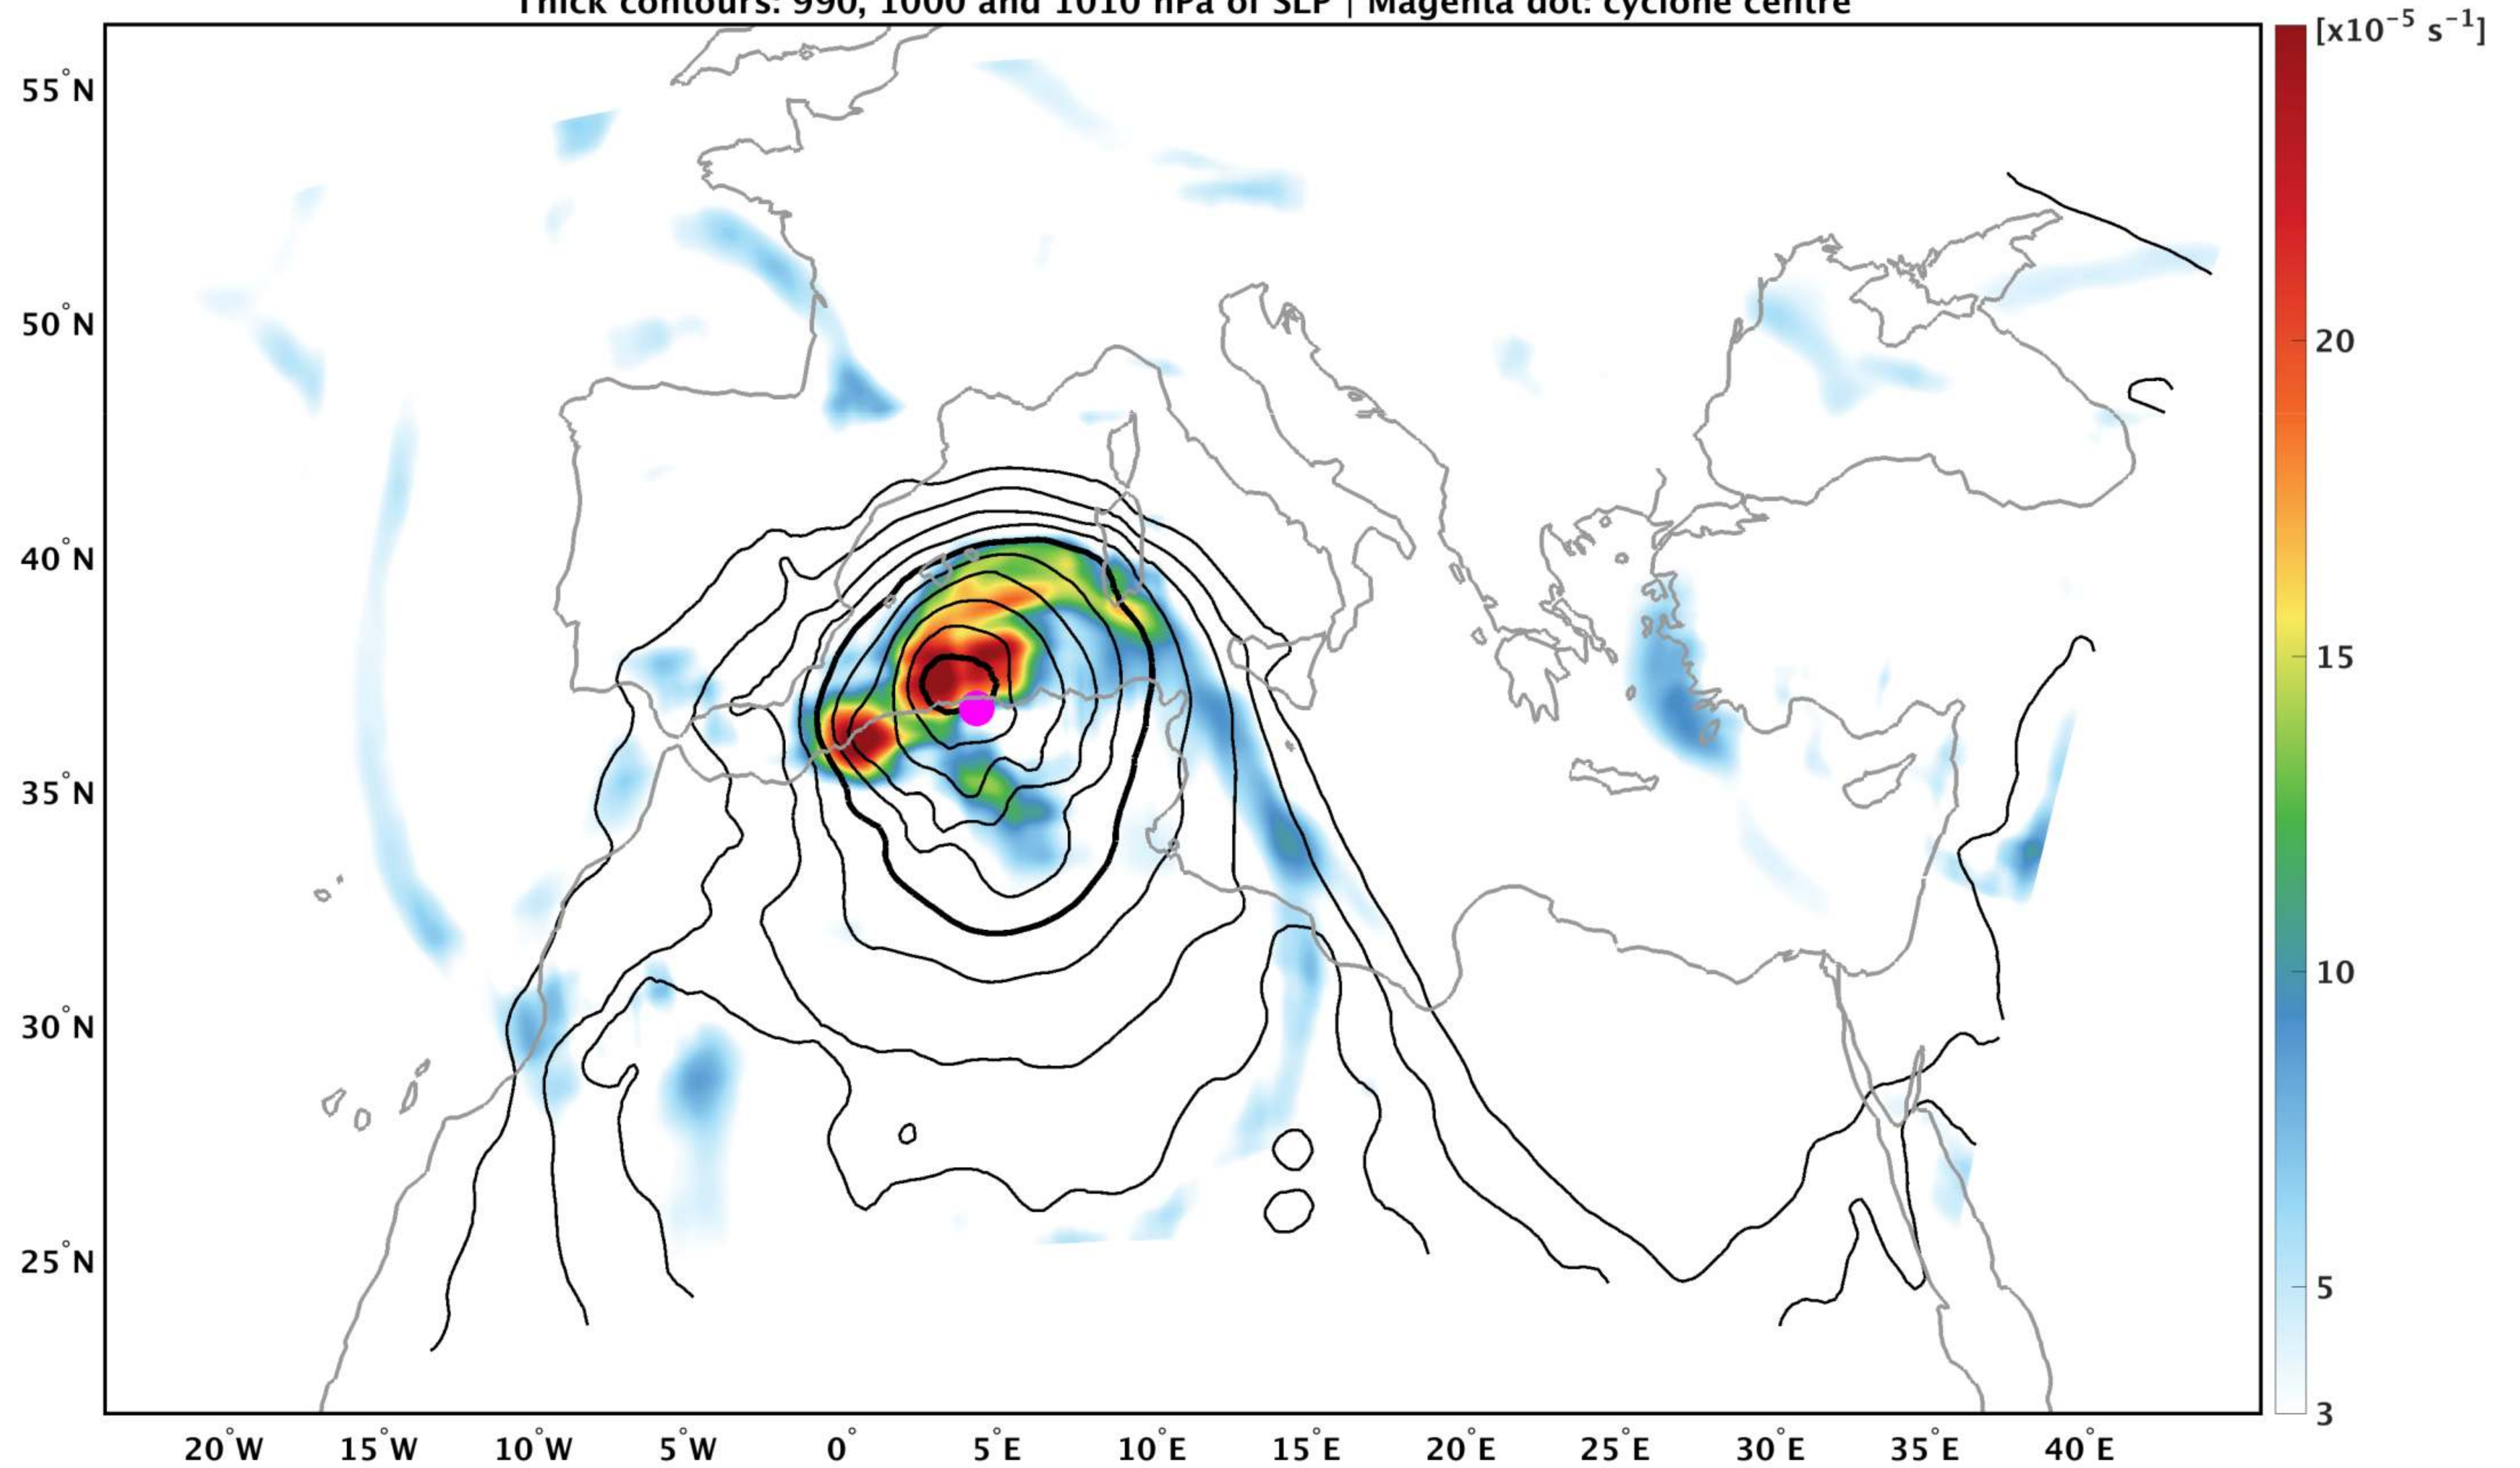



Case-10; Date: 5/3/2015

Colour: Relative vorticity ( $\times 10^{-5}$ ) | Contour: SLP (from 1018 hPa with an interval of 2 hPa)

Thick contours: 990, 1000 and 1010 hPa of SLP | Magenta dot: cyclone centre

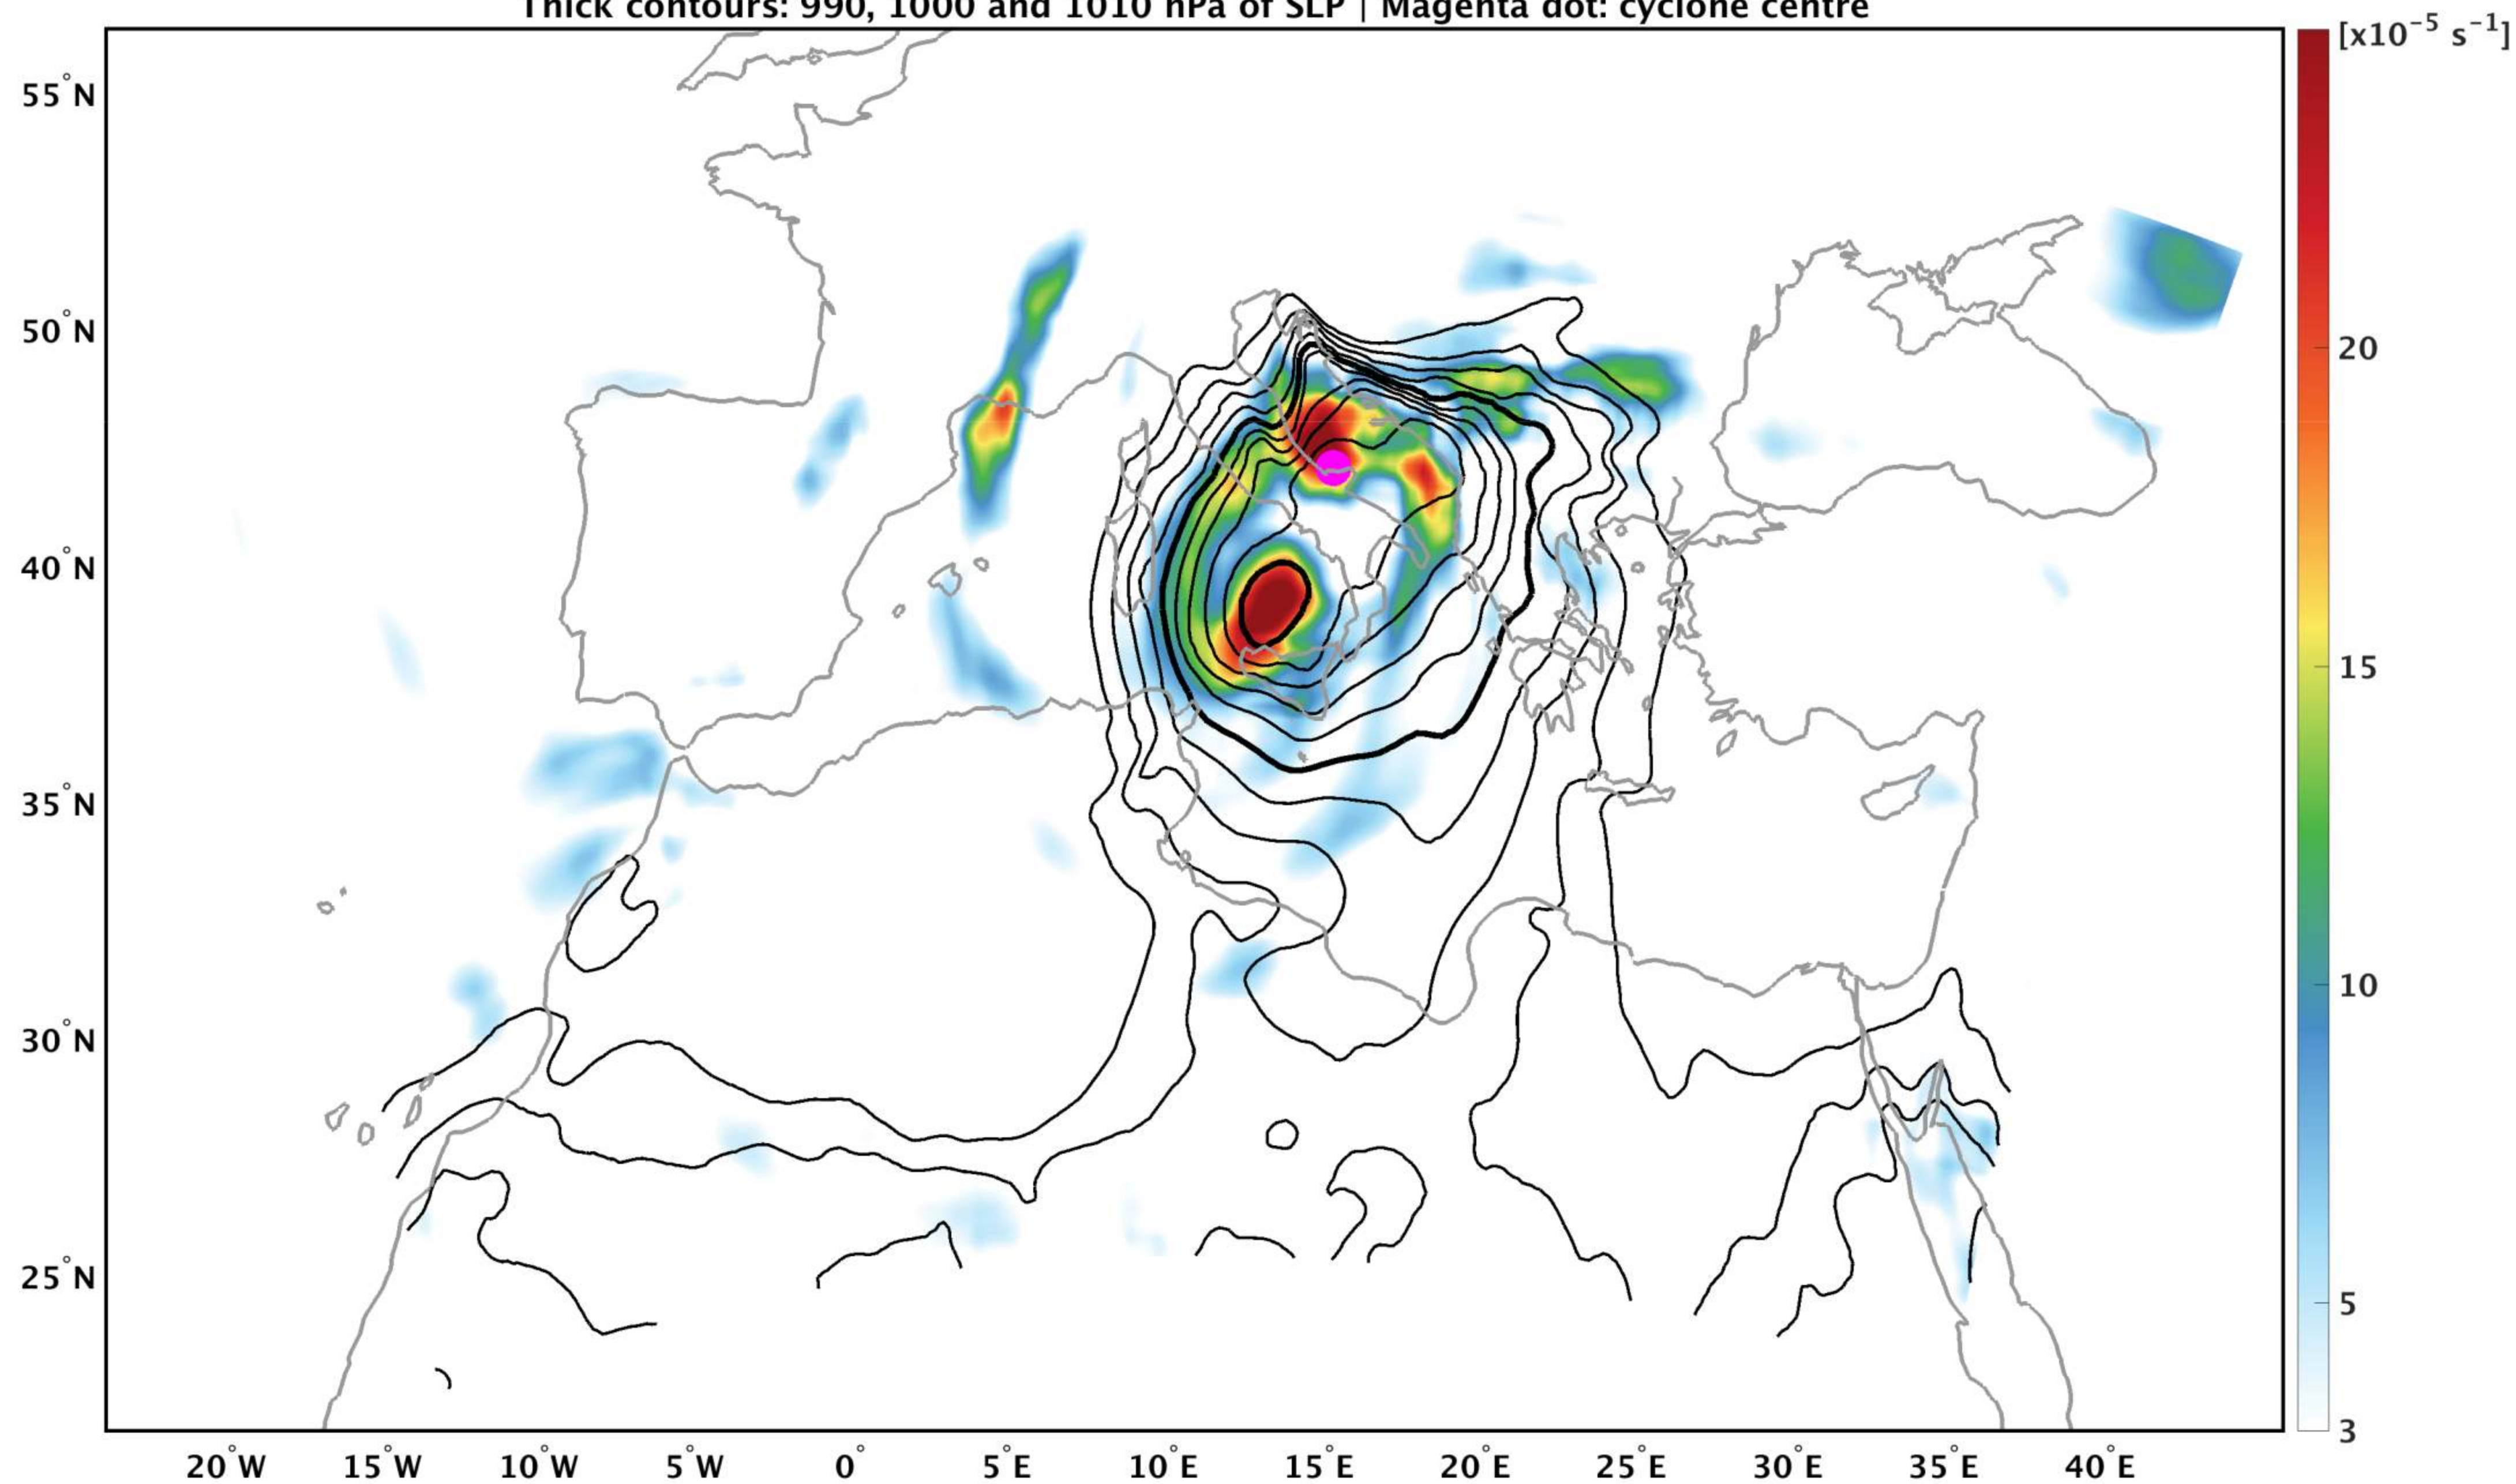



Case-11; Date: 10/2/2010

Colour: Relative vorticity ( $\times 10^{-5}$ ) | Contour: SLP (from 1018 hPa with an interval of 2 hPa)

Thick contours: 990, 1000 and 1010 hPa of SLP | Magenta dot: cyclone centre

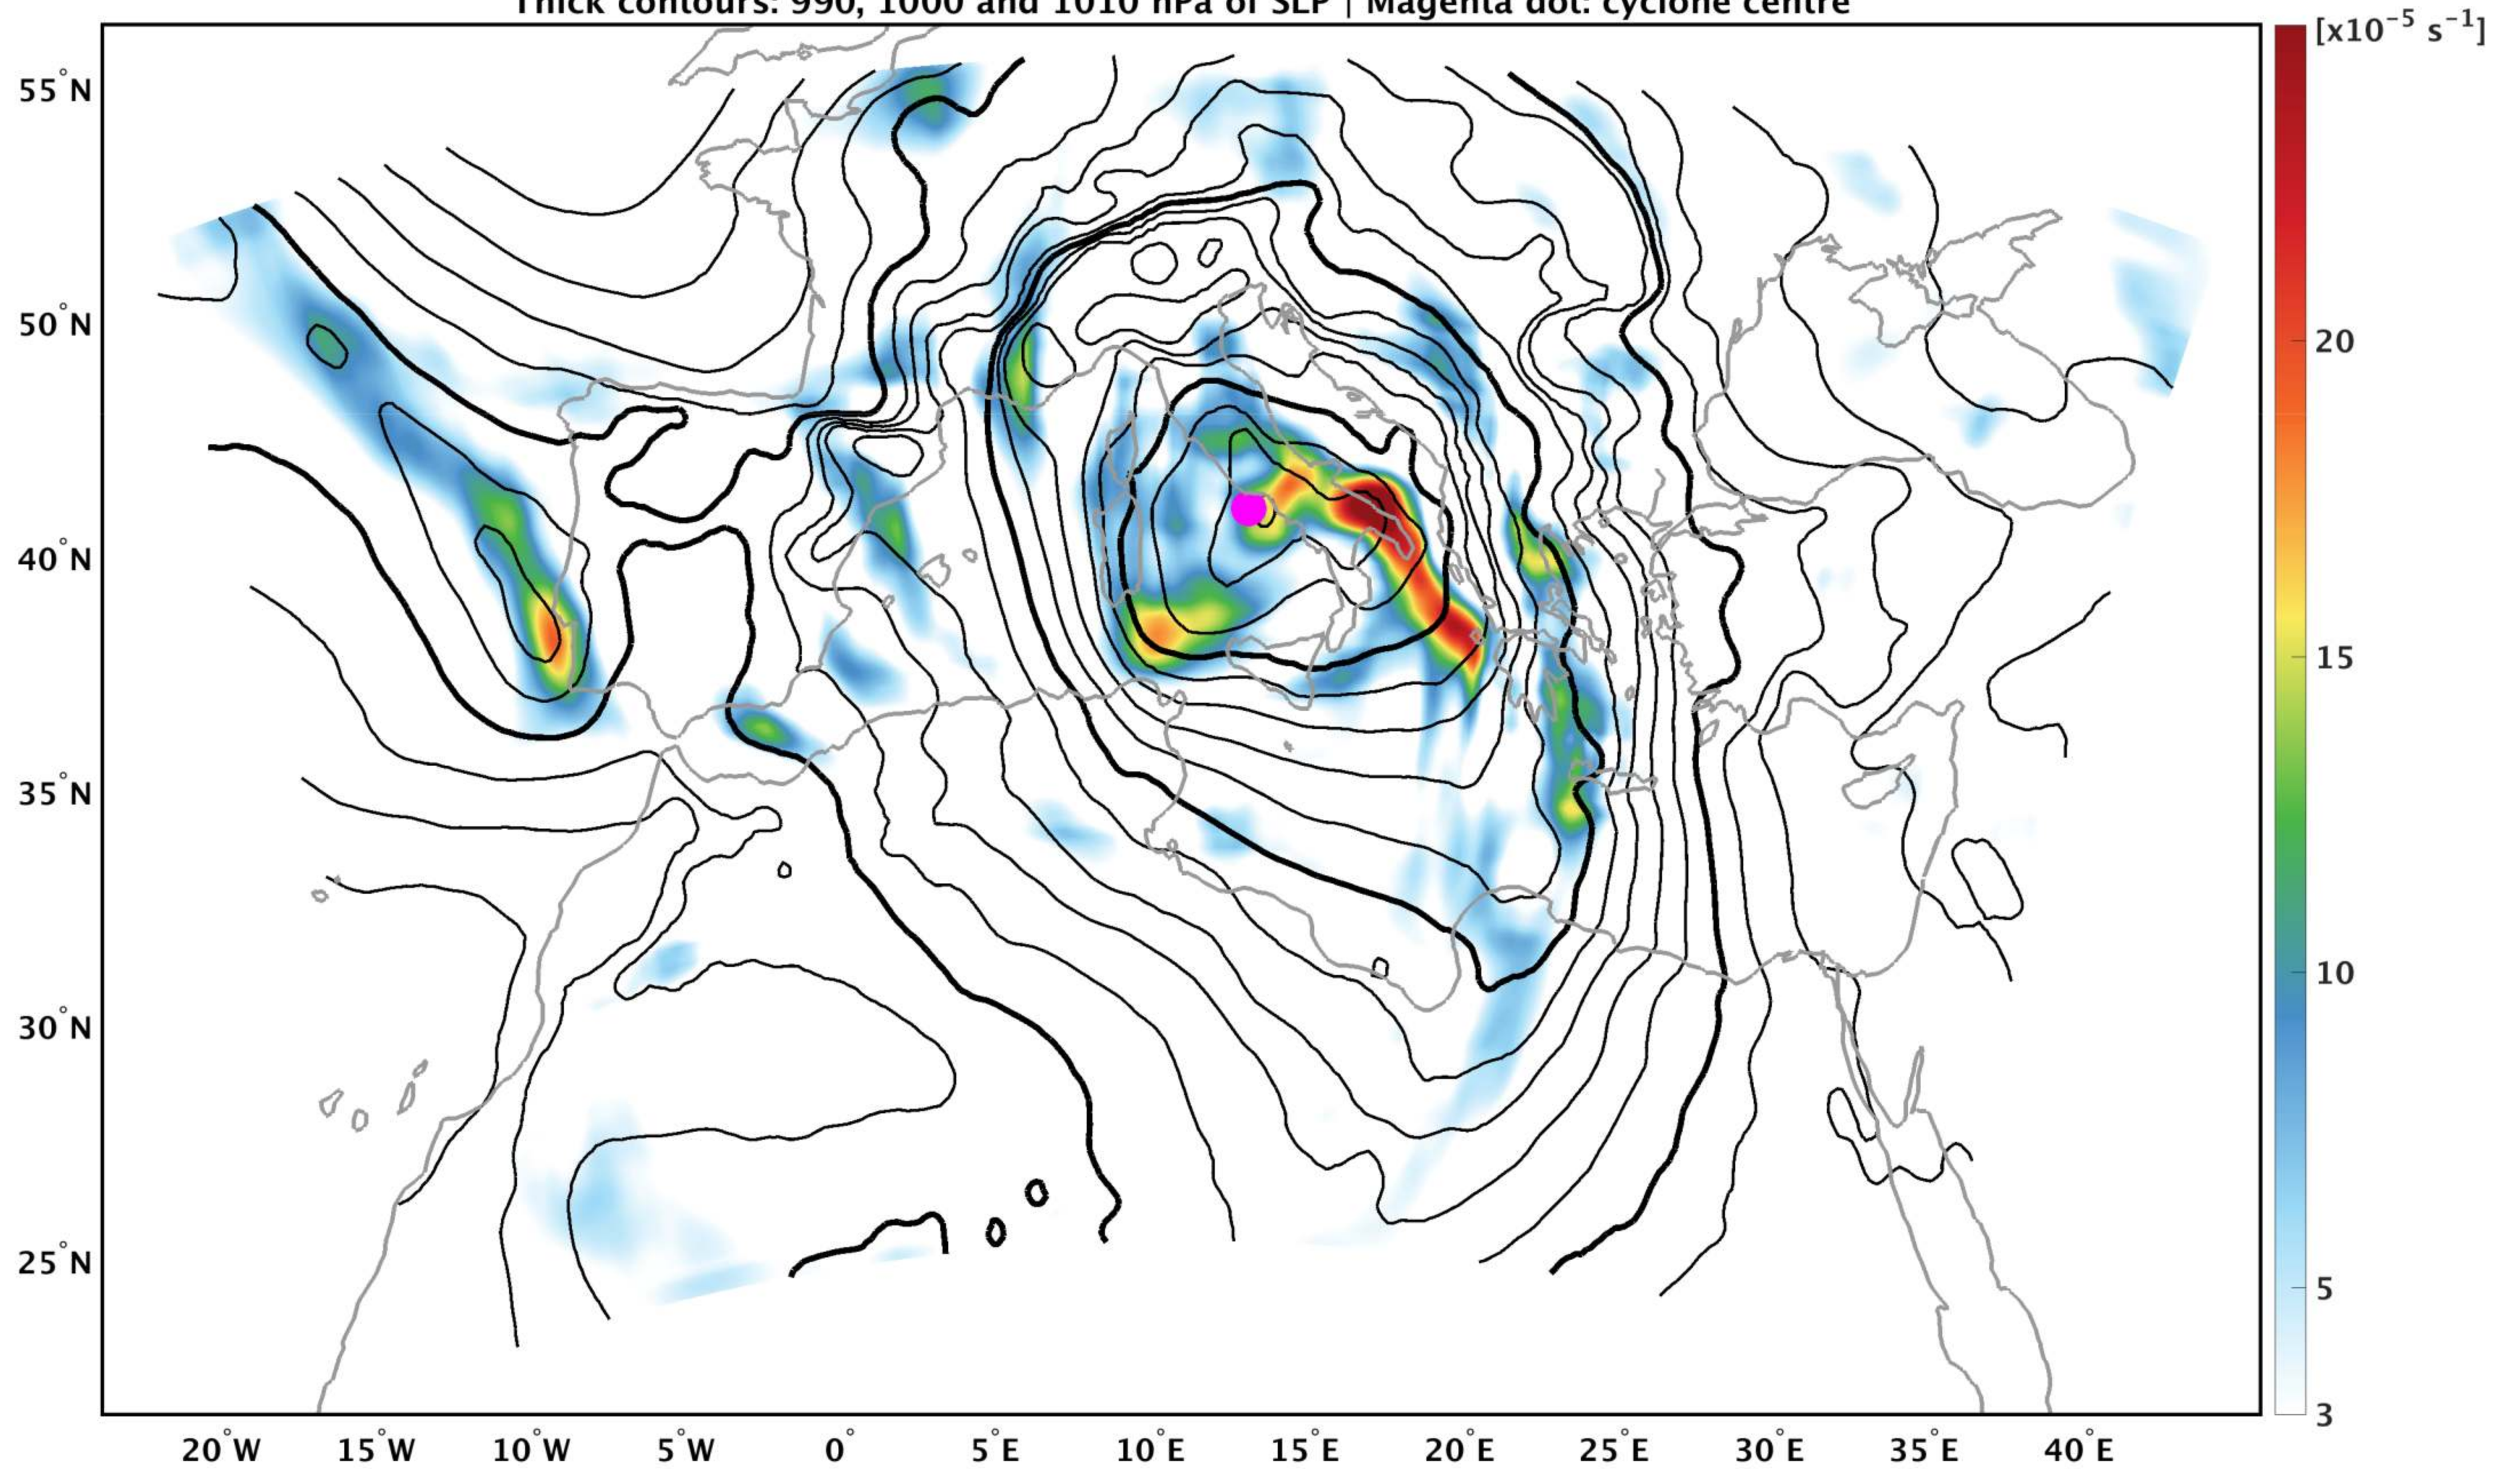



Case-12; Date: 4/5/2010

Colour: Relative vorticity ( $\times 10^{-5}$ ) | Contour: SLP (from 1018 hPa with an interval of 2 hPa)

Thick contours: 990, 1000 and 1010 hPa of SLP | Magenta dot: cyclone centre

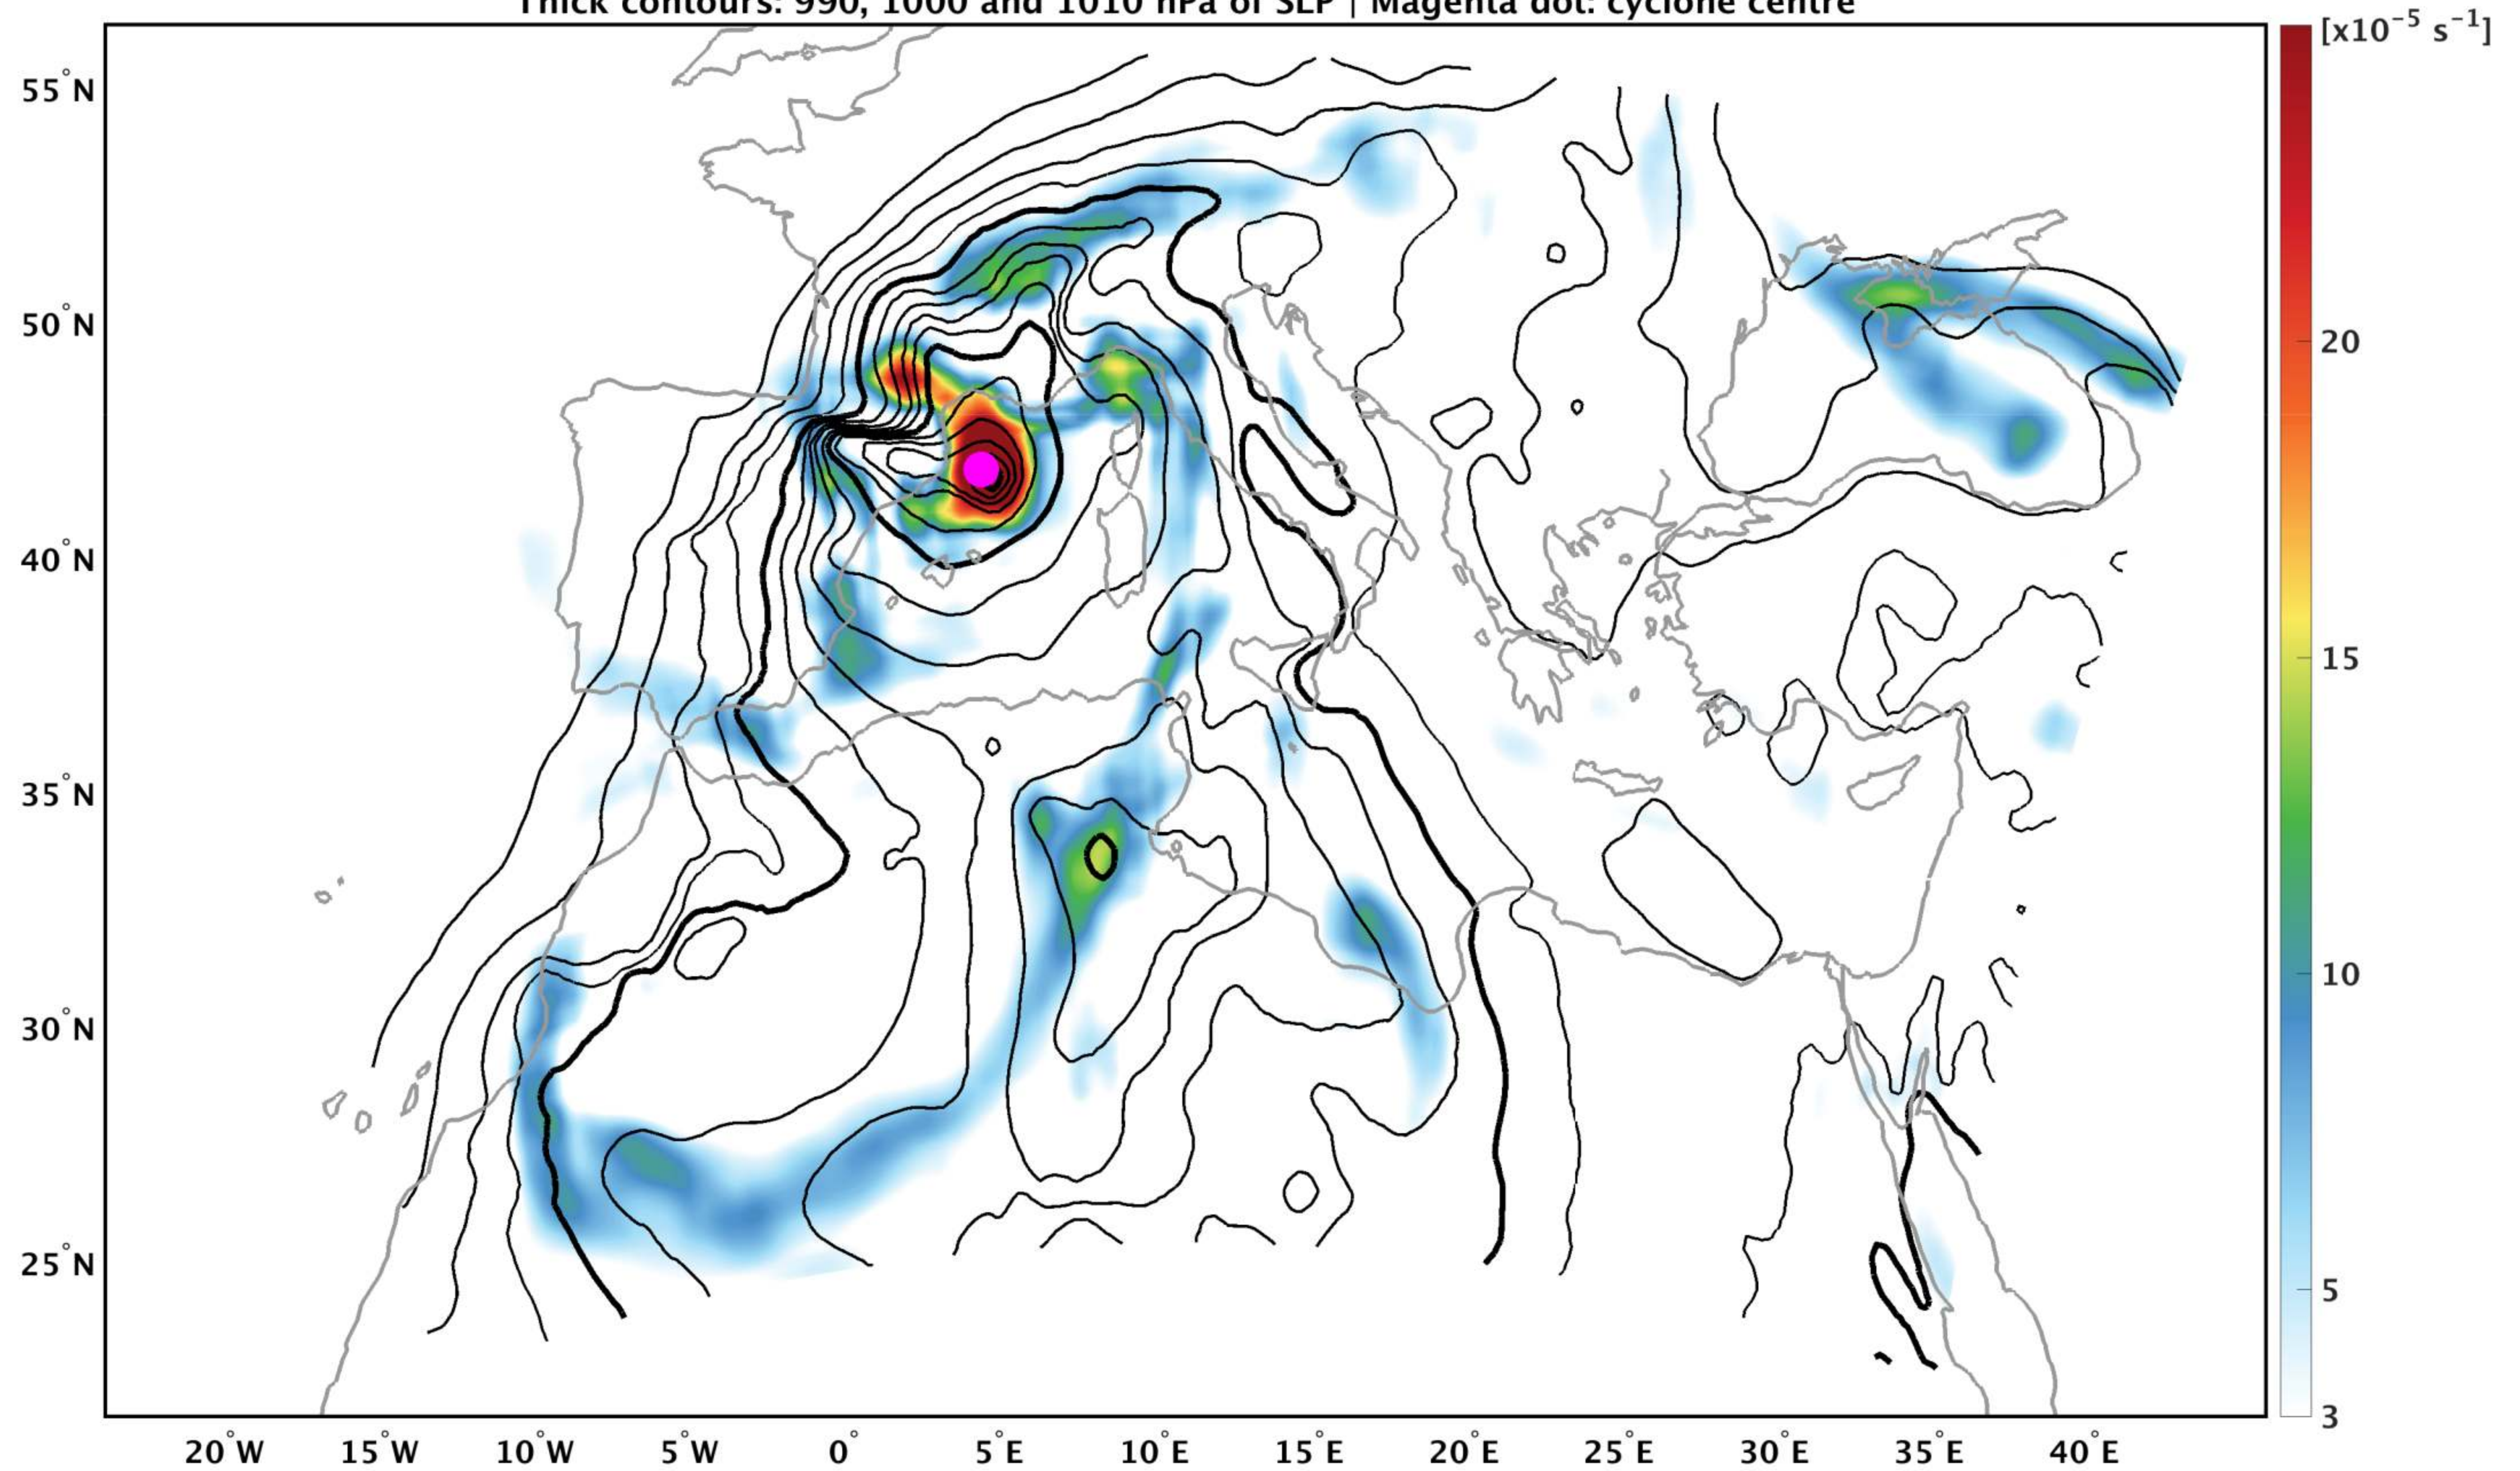



Case-13; Date: 28/2/2012

Colour: Relative vorticity ( $\times 10^{-5}$ ) | Contour: SLP (from 1018 hPa with an interval of 2 hPa)

Thick contours: 990, 1000 and 1010 hPa of SLP | Magenta dot: cyclone centre

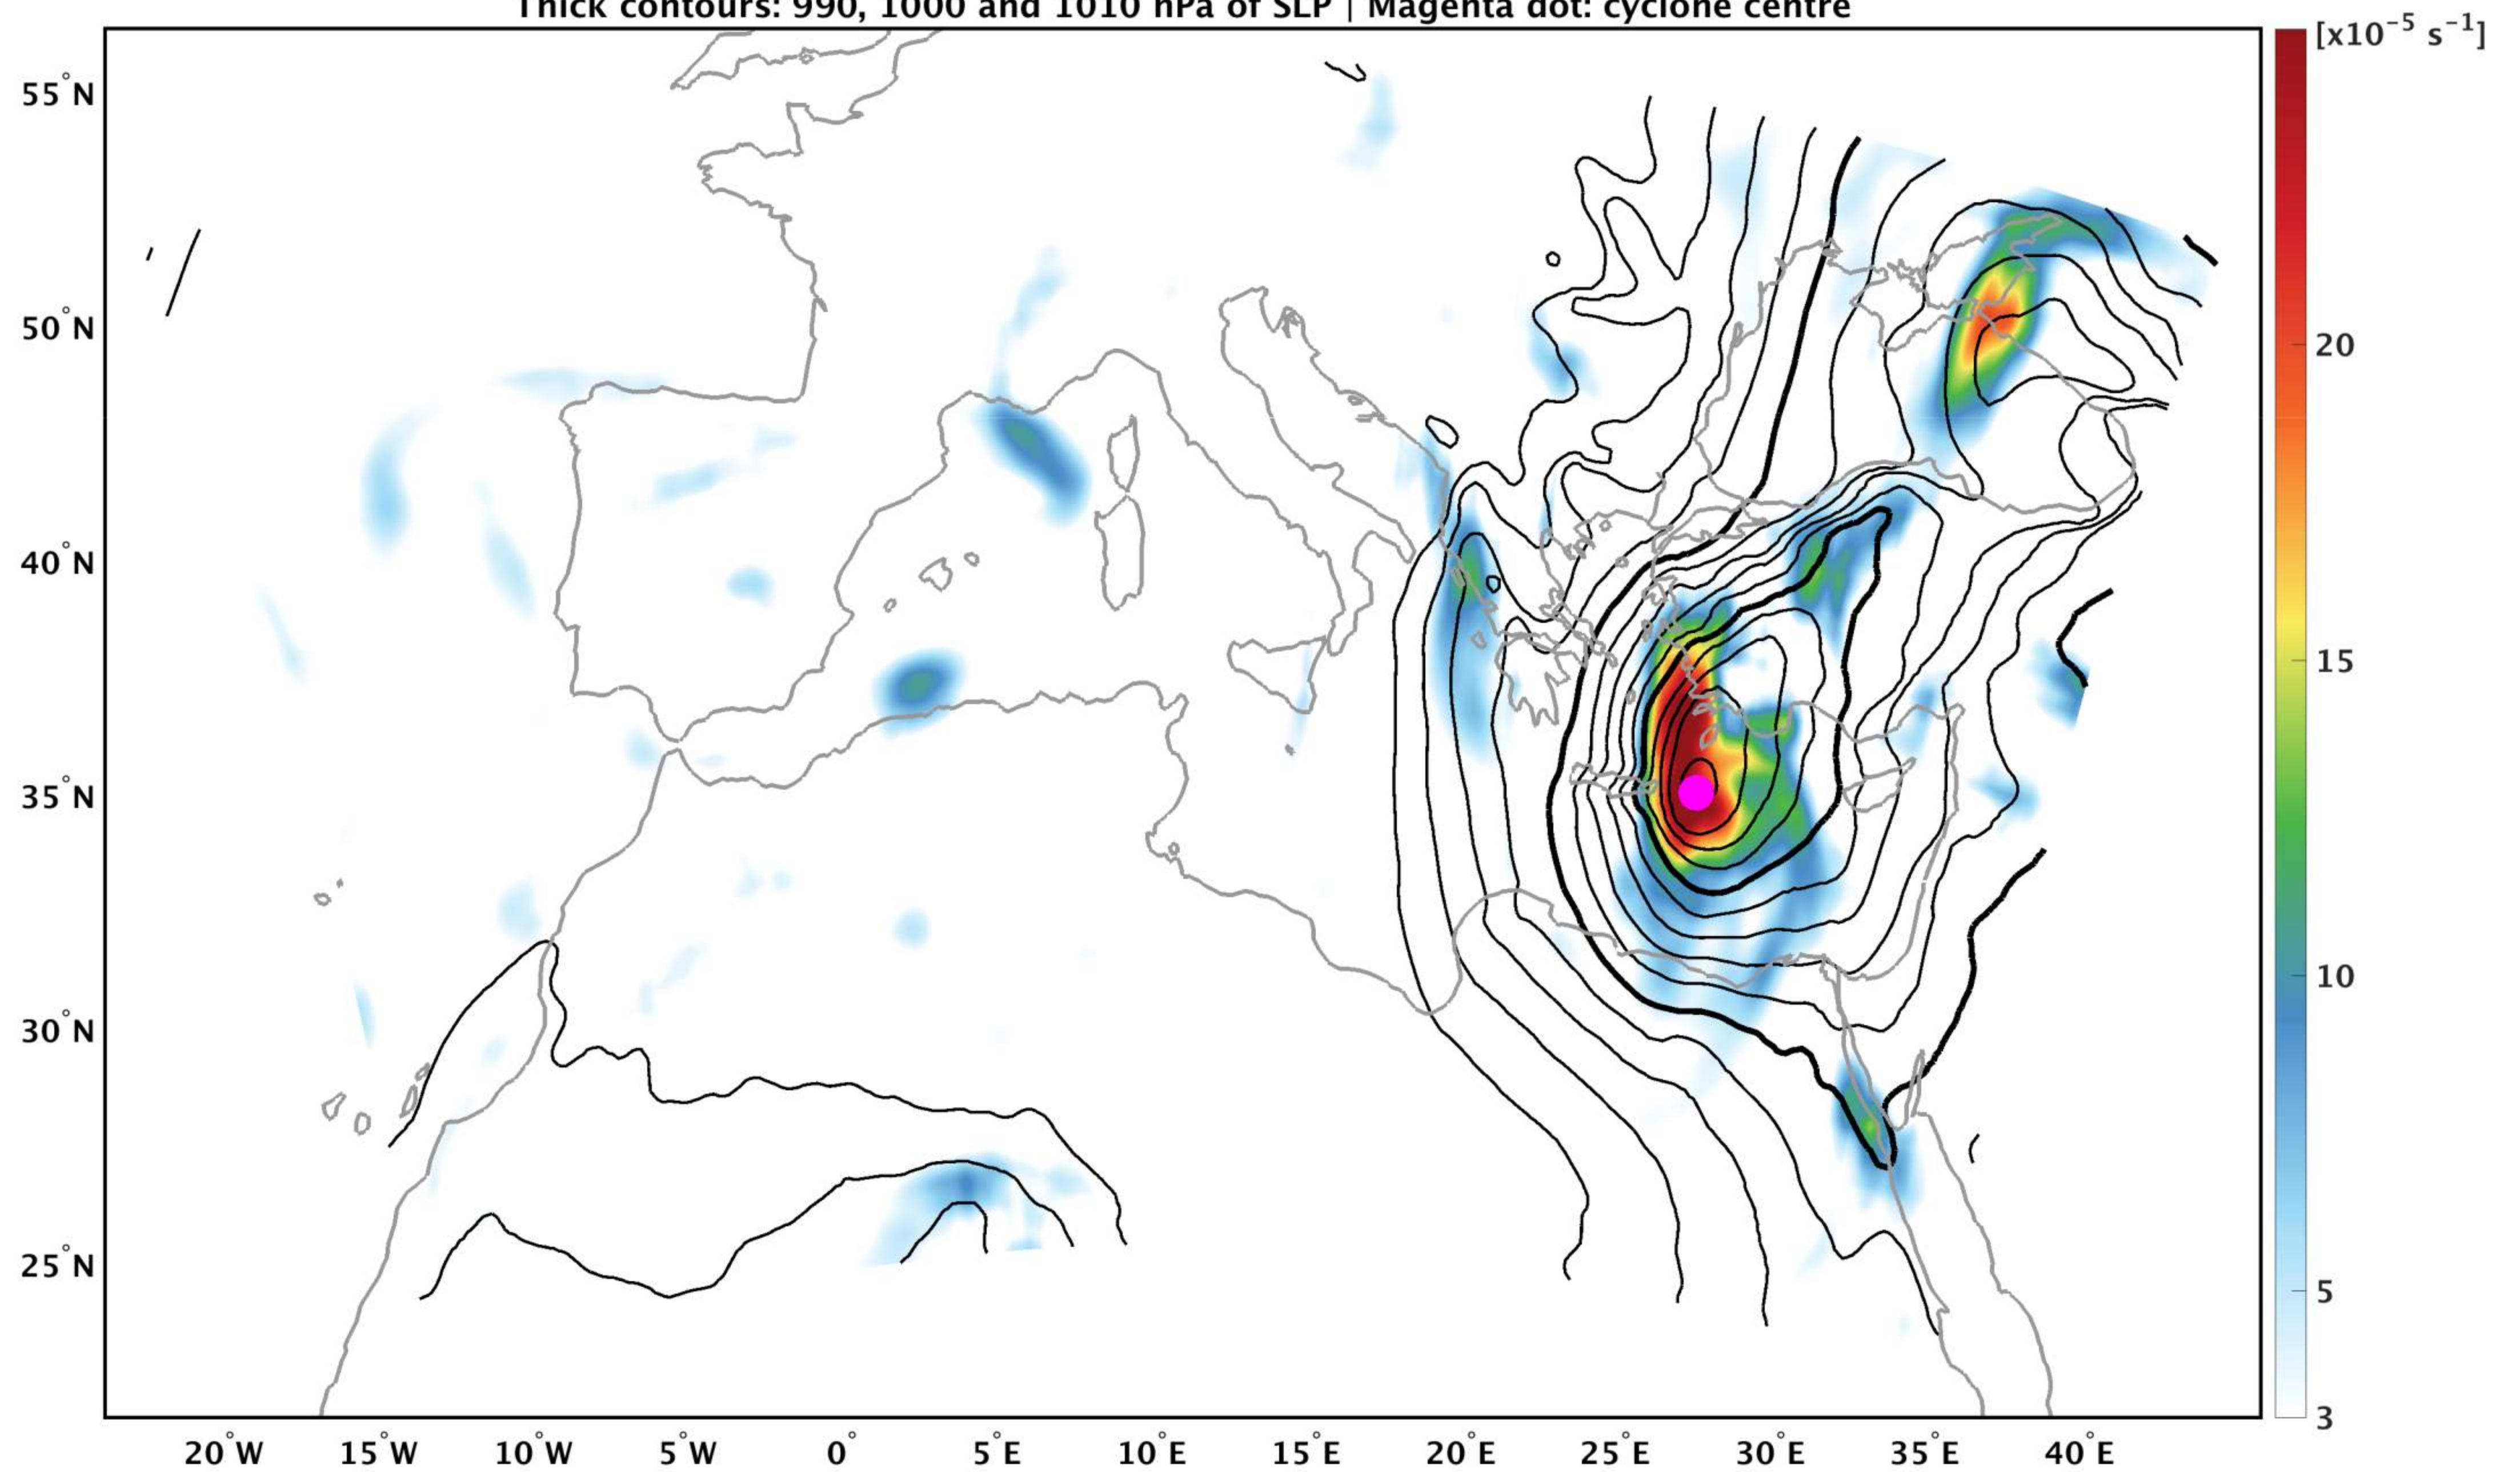



Case-14; Date: 30/11/2014

Colour: Relative vorticity ( $\times 10^{-5}$ ) | Contour: SLP (from 1018 hPa with an interval of 2 hPa)

Thick contours: 990, 1000 and 1010 hPa of SLP | Magenta dot: cyclone centre

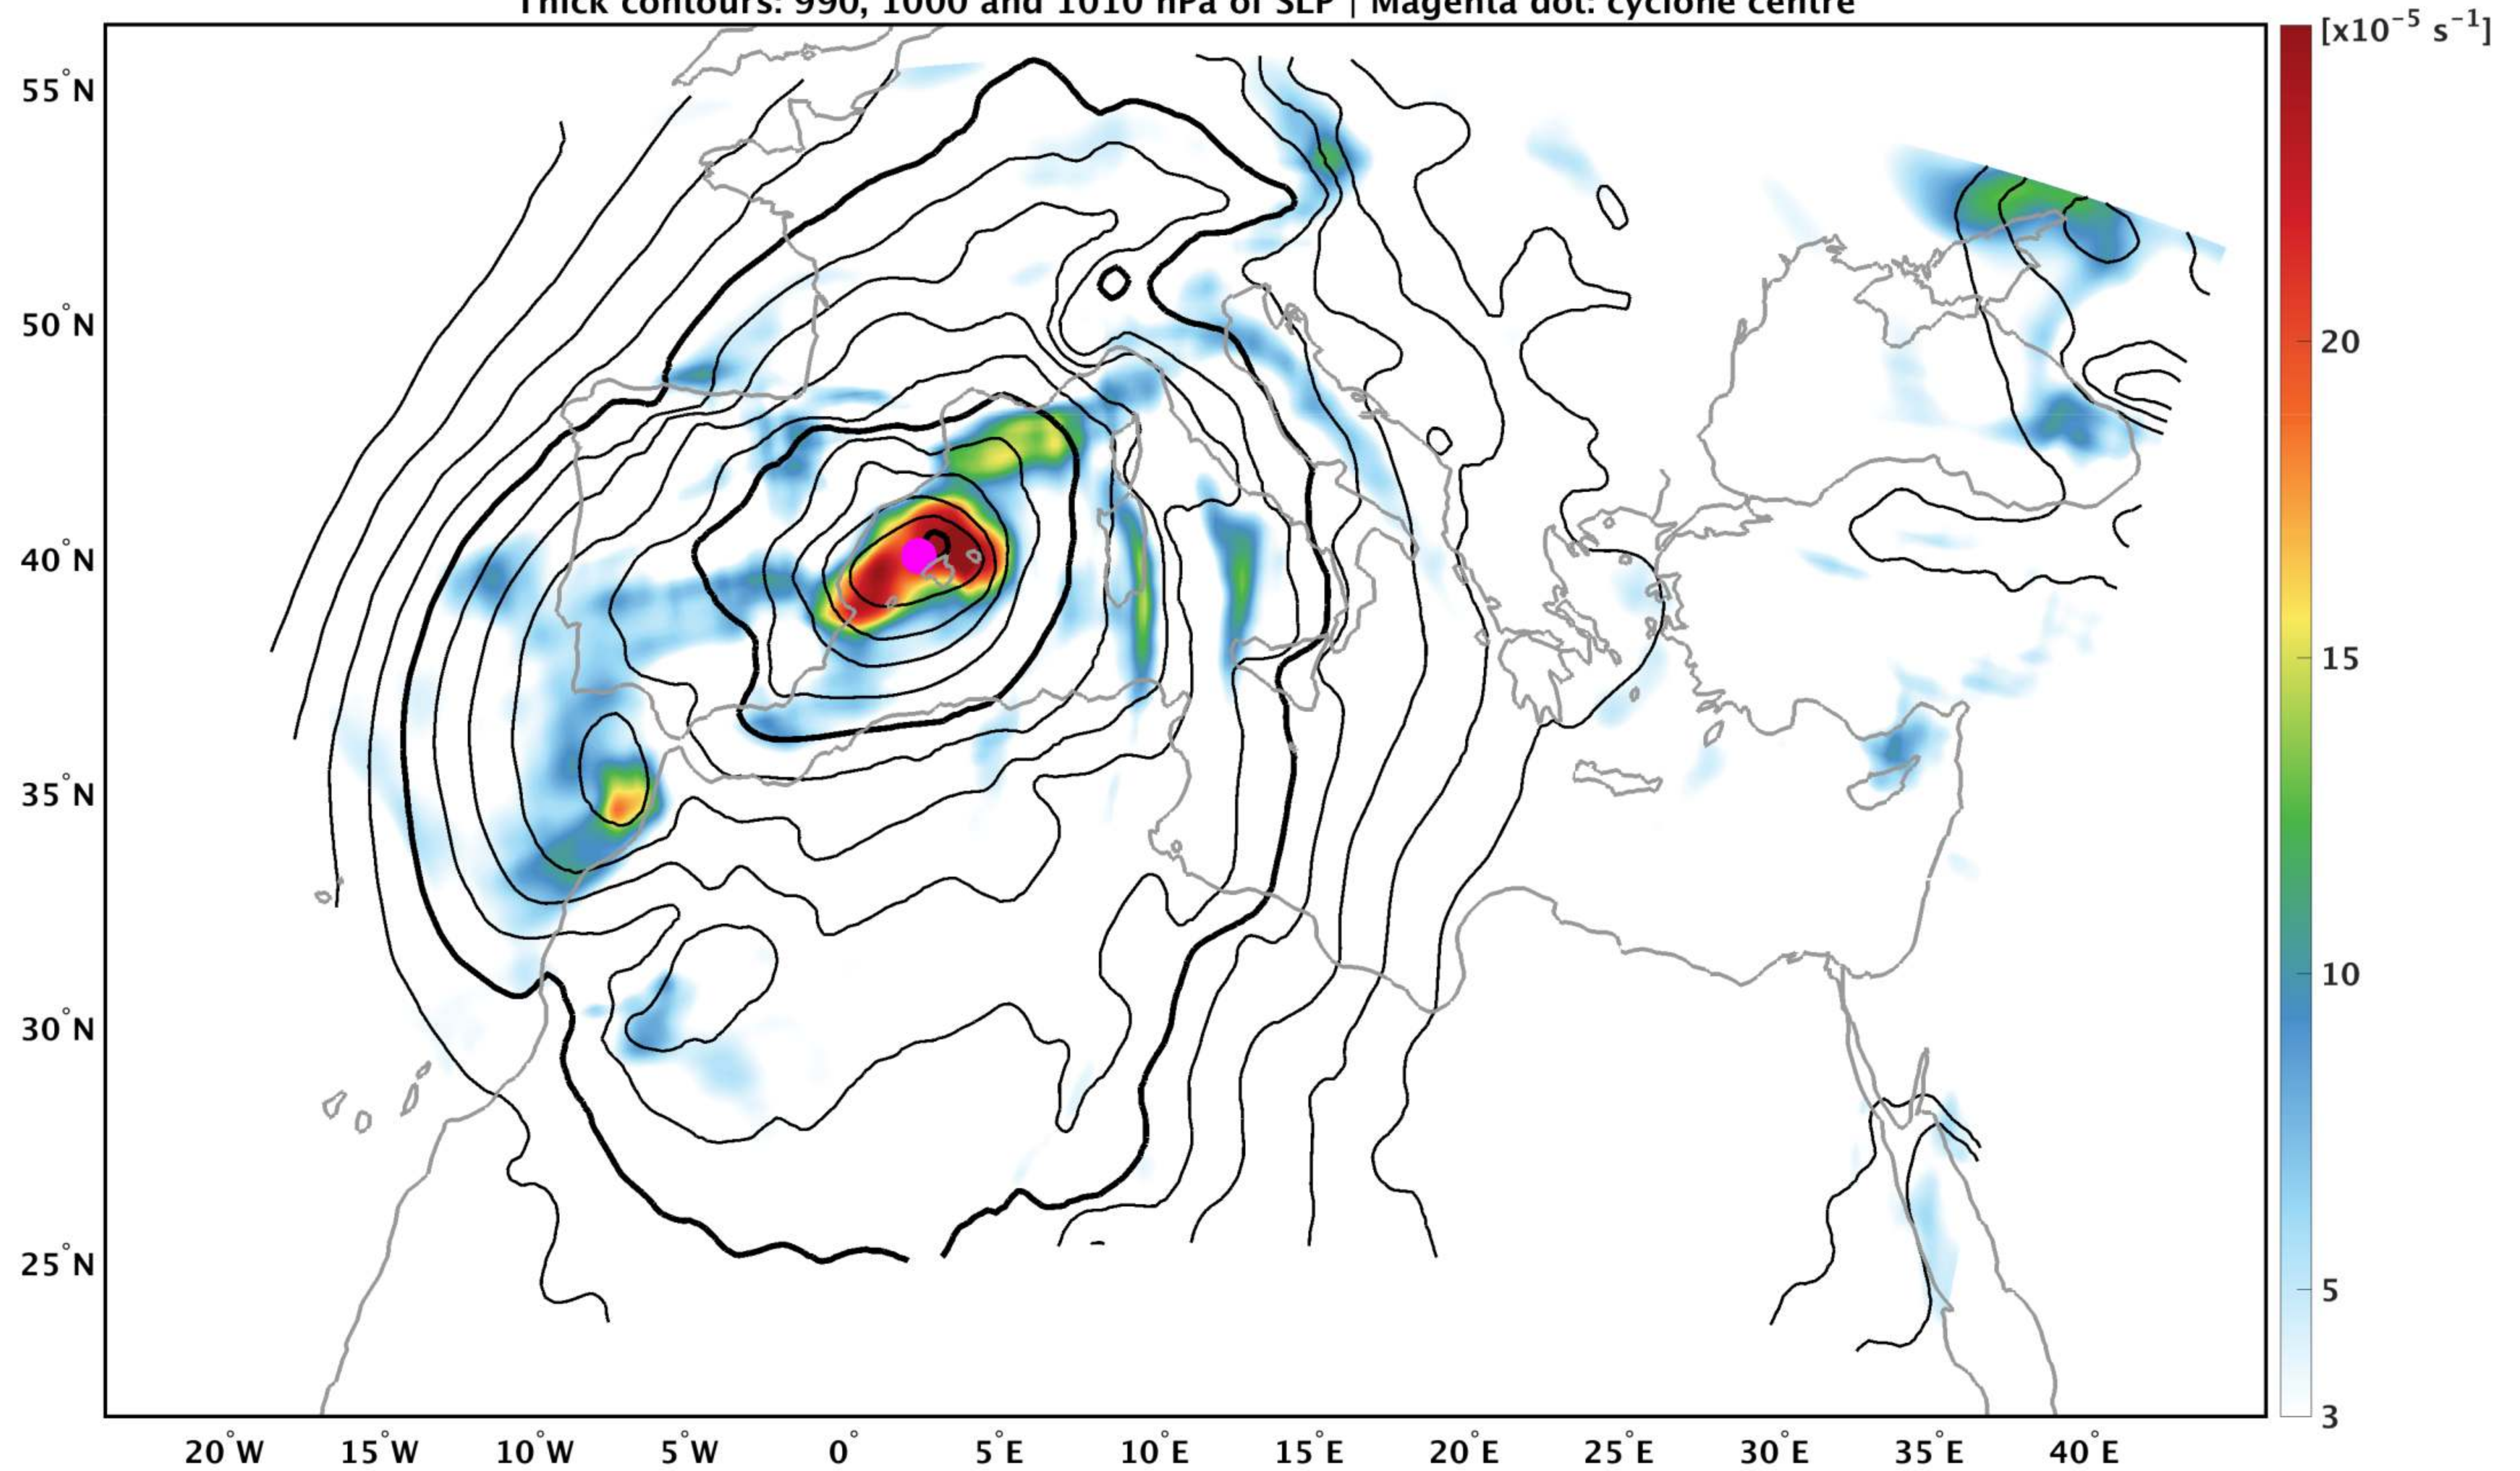



Case-15; Date: 28/11/2012

Colour: Relative vorticity ( $\times 10^{-5}$ ) | Contour: SLP (from 1018 hPa with an interval of 2 hPa)

Thick contours: 990, 1000 and 1010 hPa of SLP | Magenta dot: cyclone centre

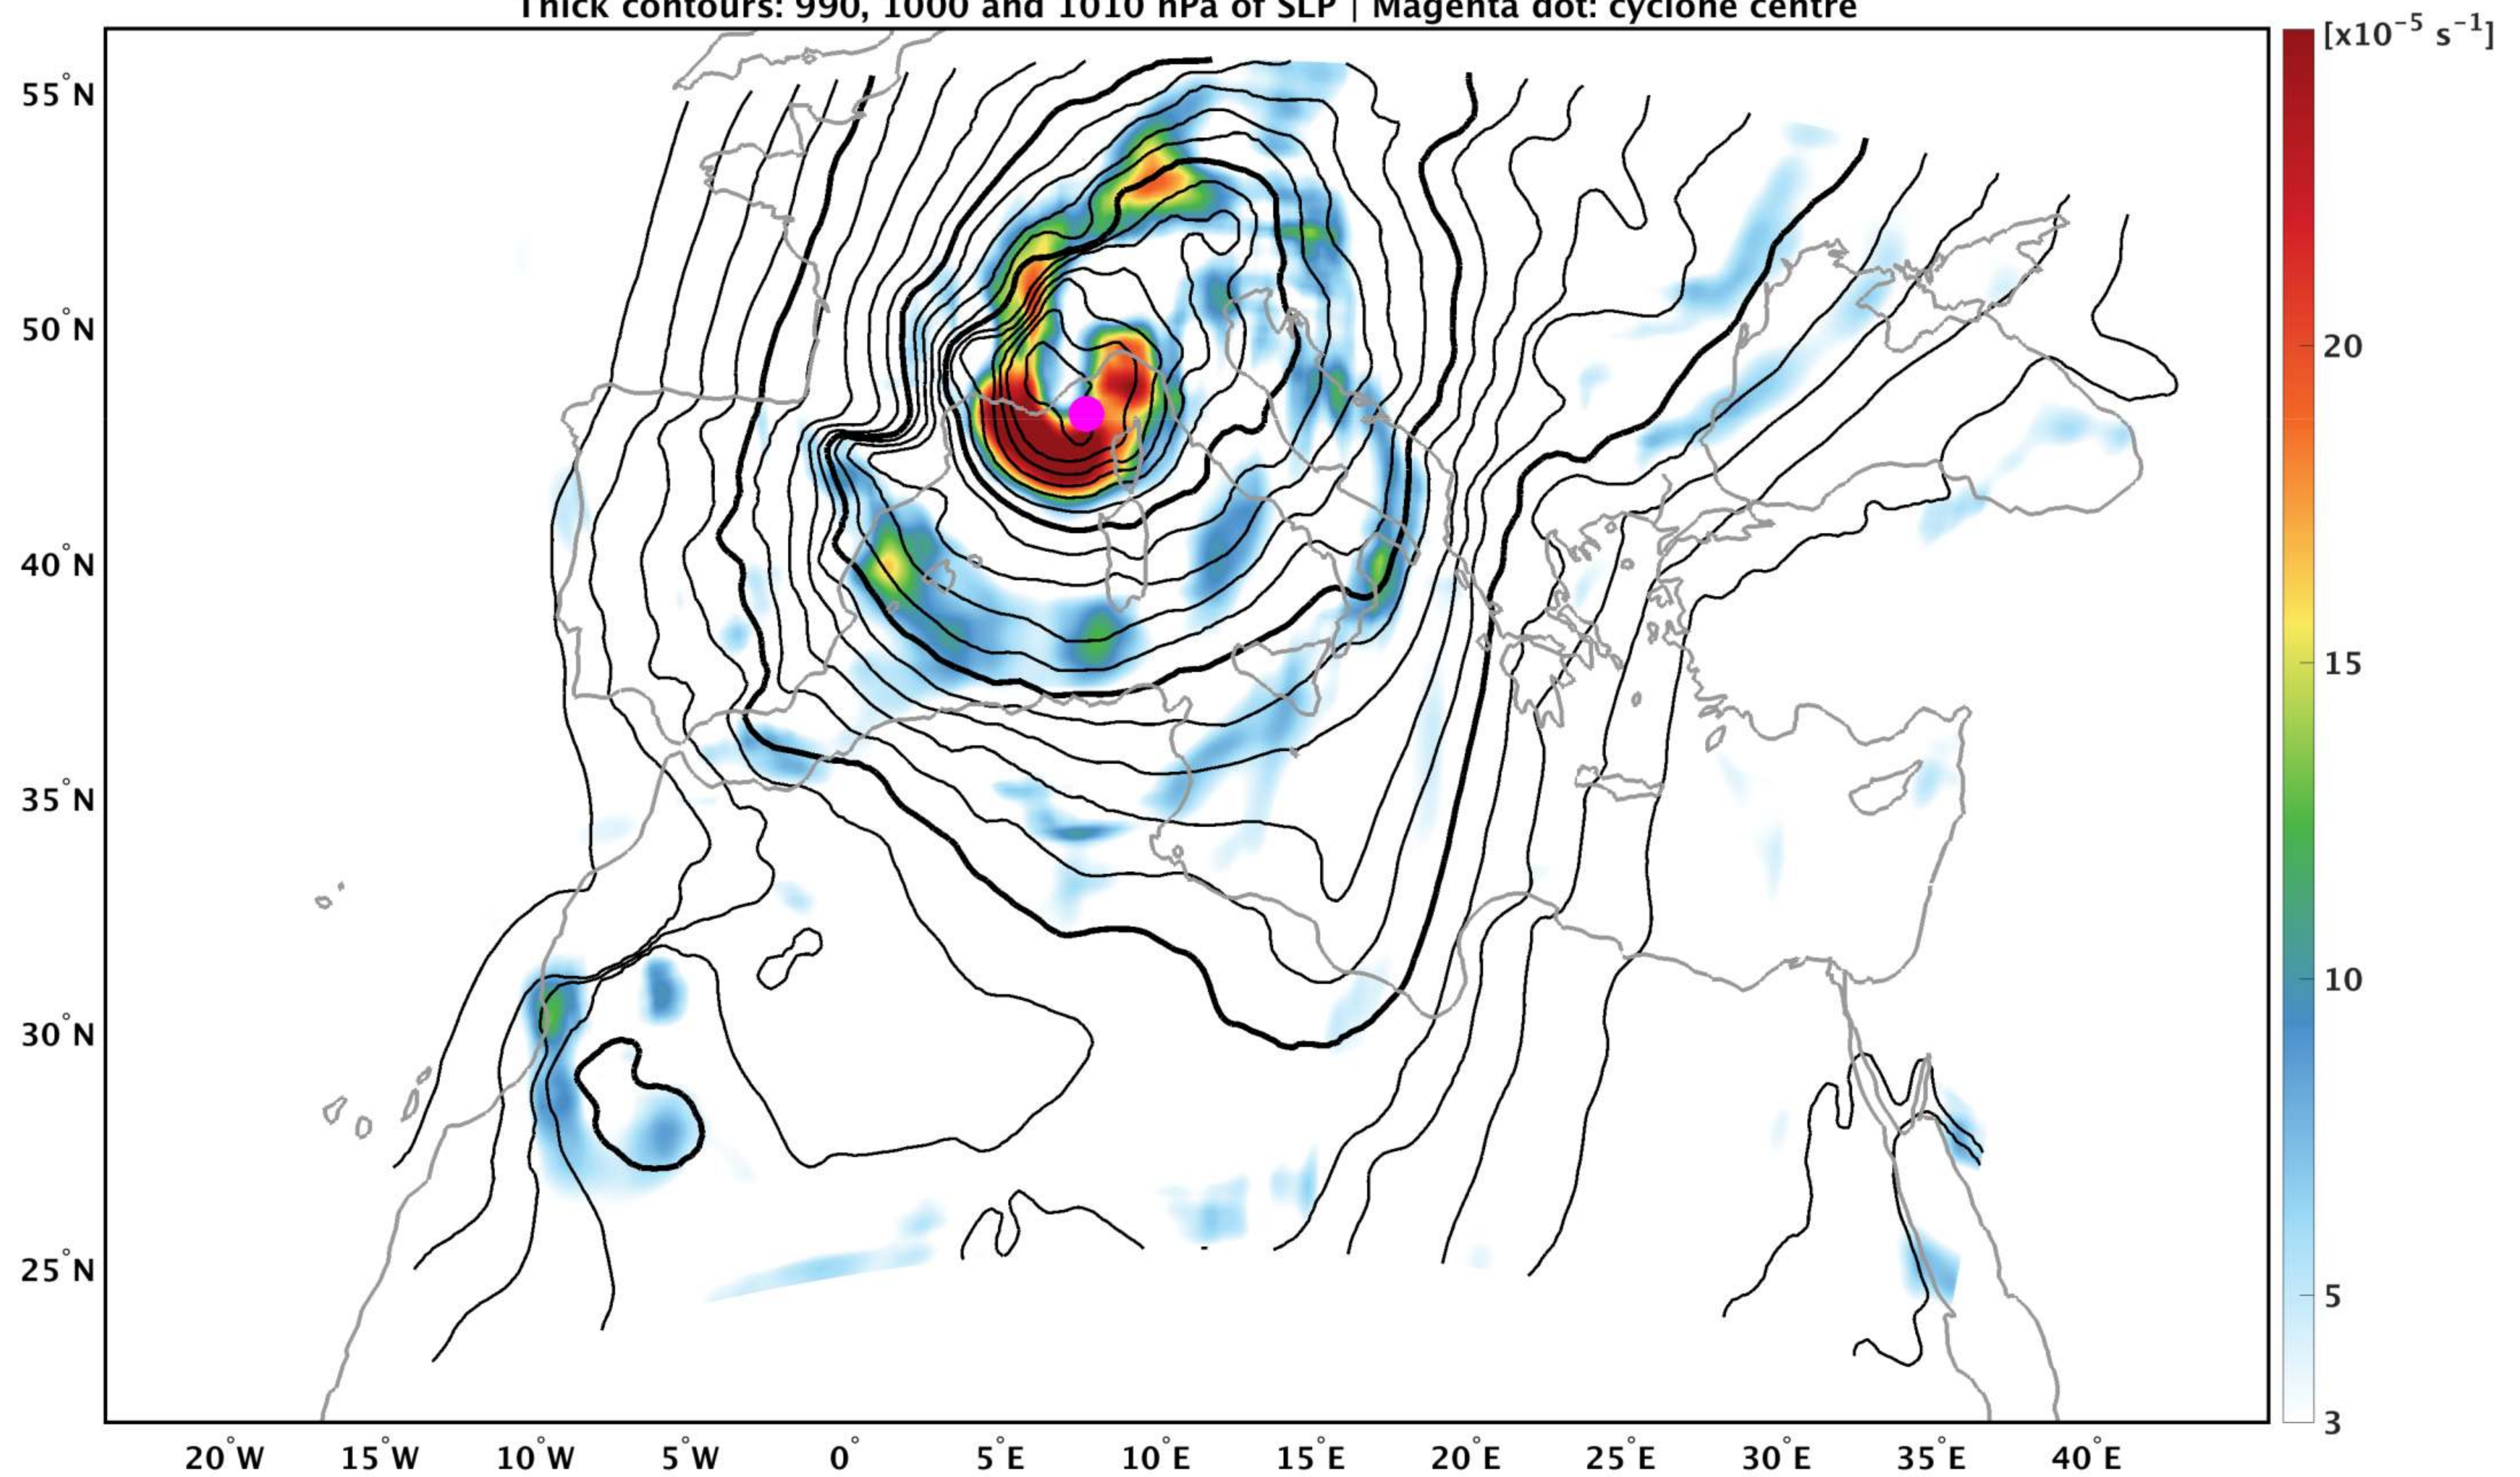



Case-16; Date: 1/12/2013

Colour: Relative vorticity ( $\times 10^{-5}$ ) | Contour: SLP (from 1018 hPa with an interval of 2 hPa)

Thick contours: 990, 1000 and 1010 hPa of SLP | Magenta dot: cyclone centre

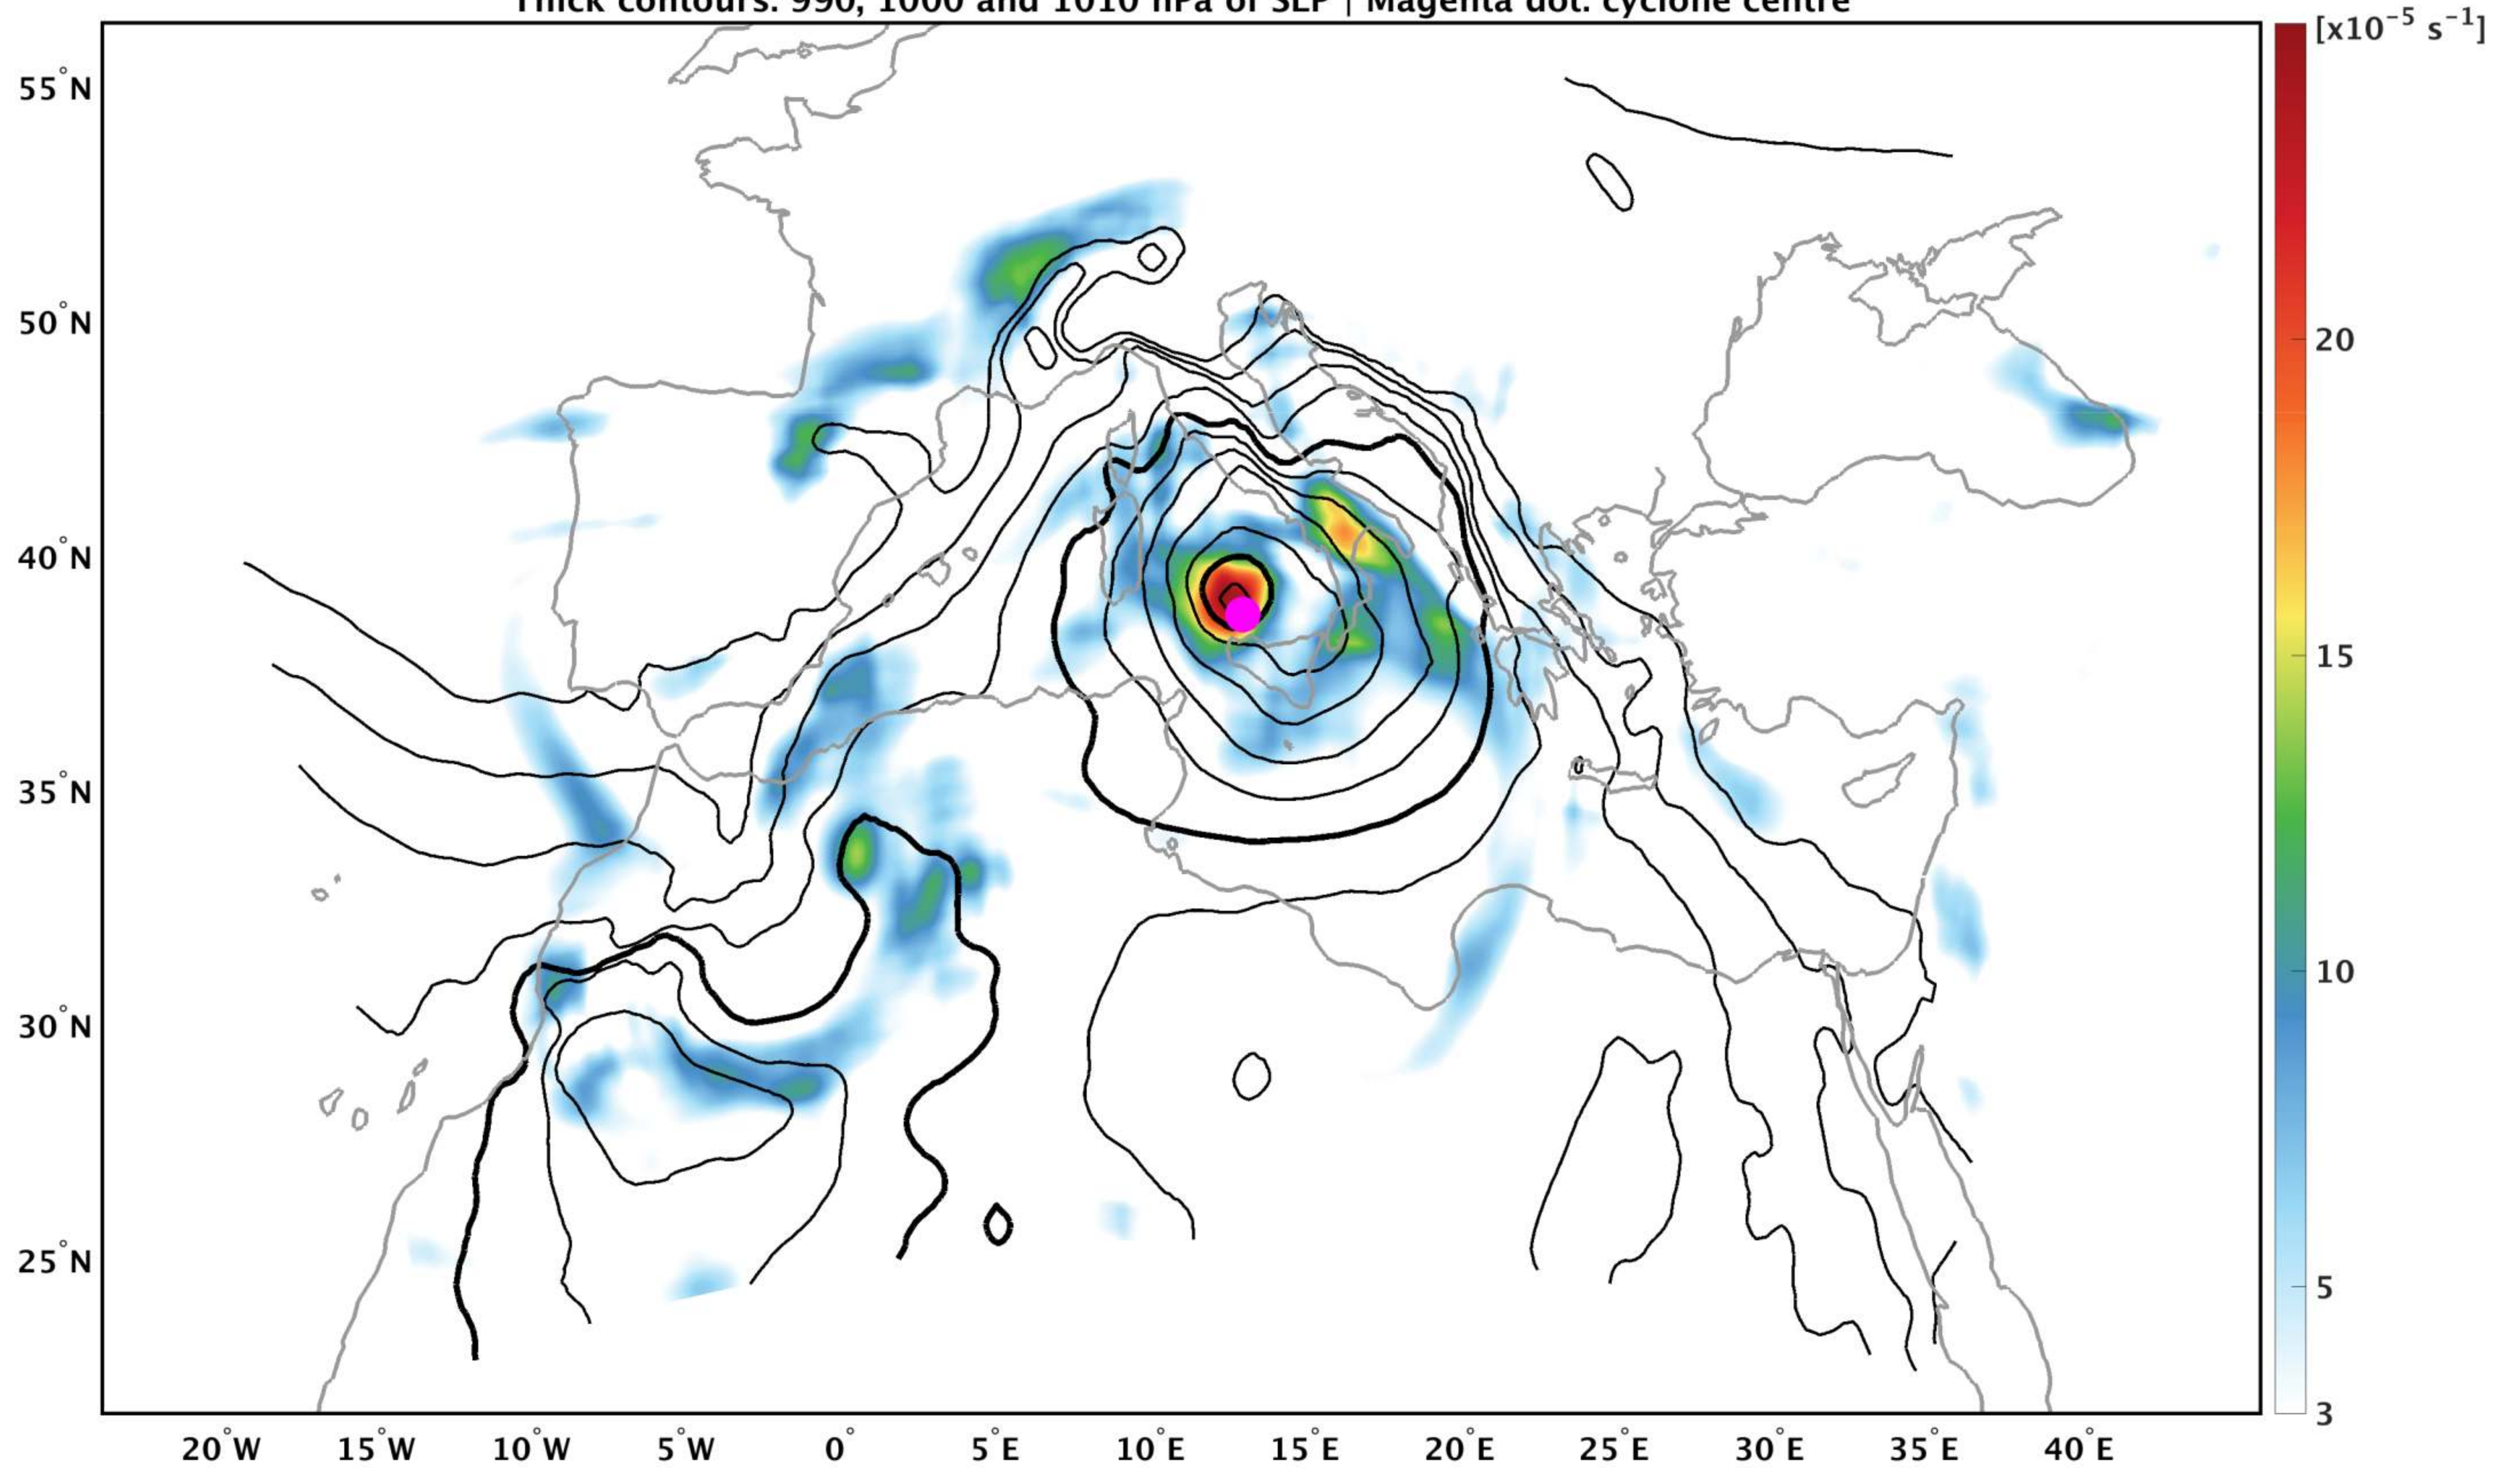



Case-17; Date: 5/3/2008

Colour: Relative vorticity ( $\times 10^{-5}$ ) | Contour: SLP (from 1018 hPa with an interval of 2 hPa)

Thick contours: 990, 1000 and 1010 hPa of SLP | Magenta dot: cyclone centre

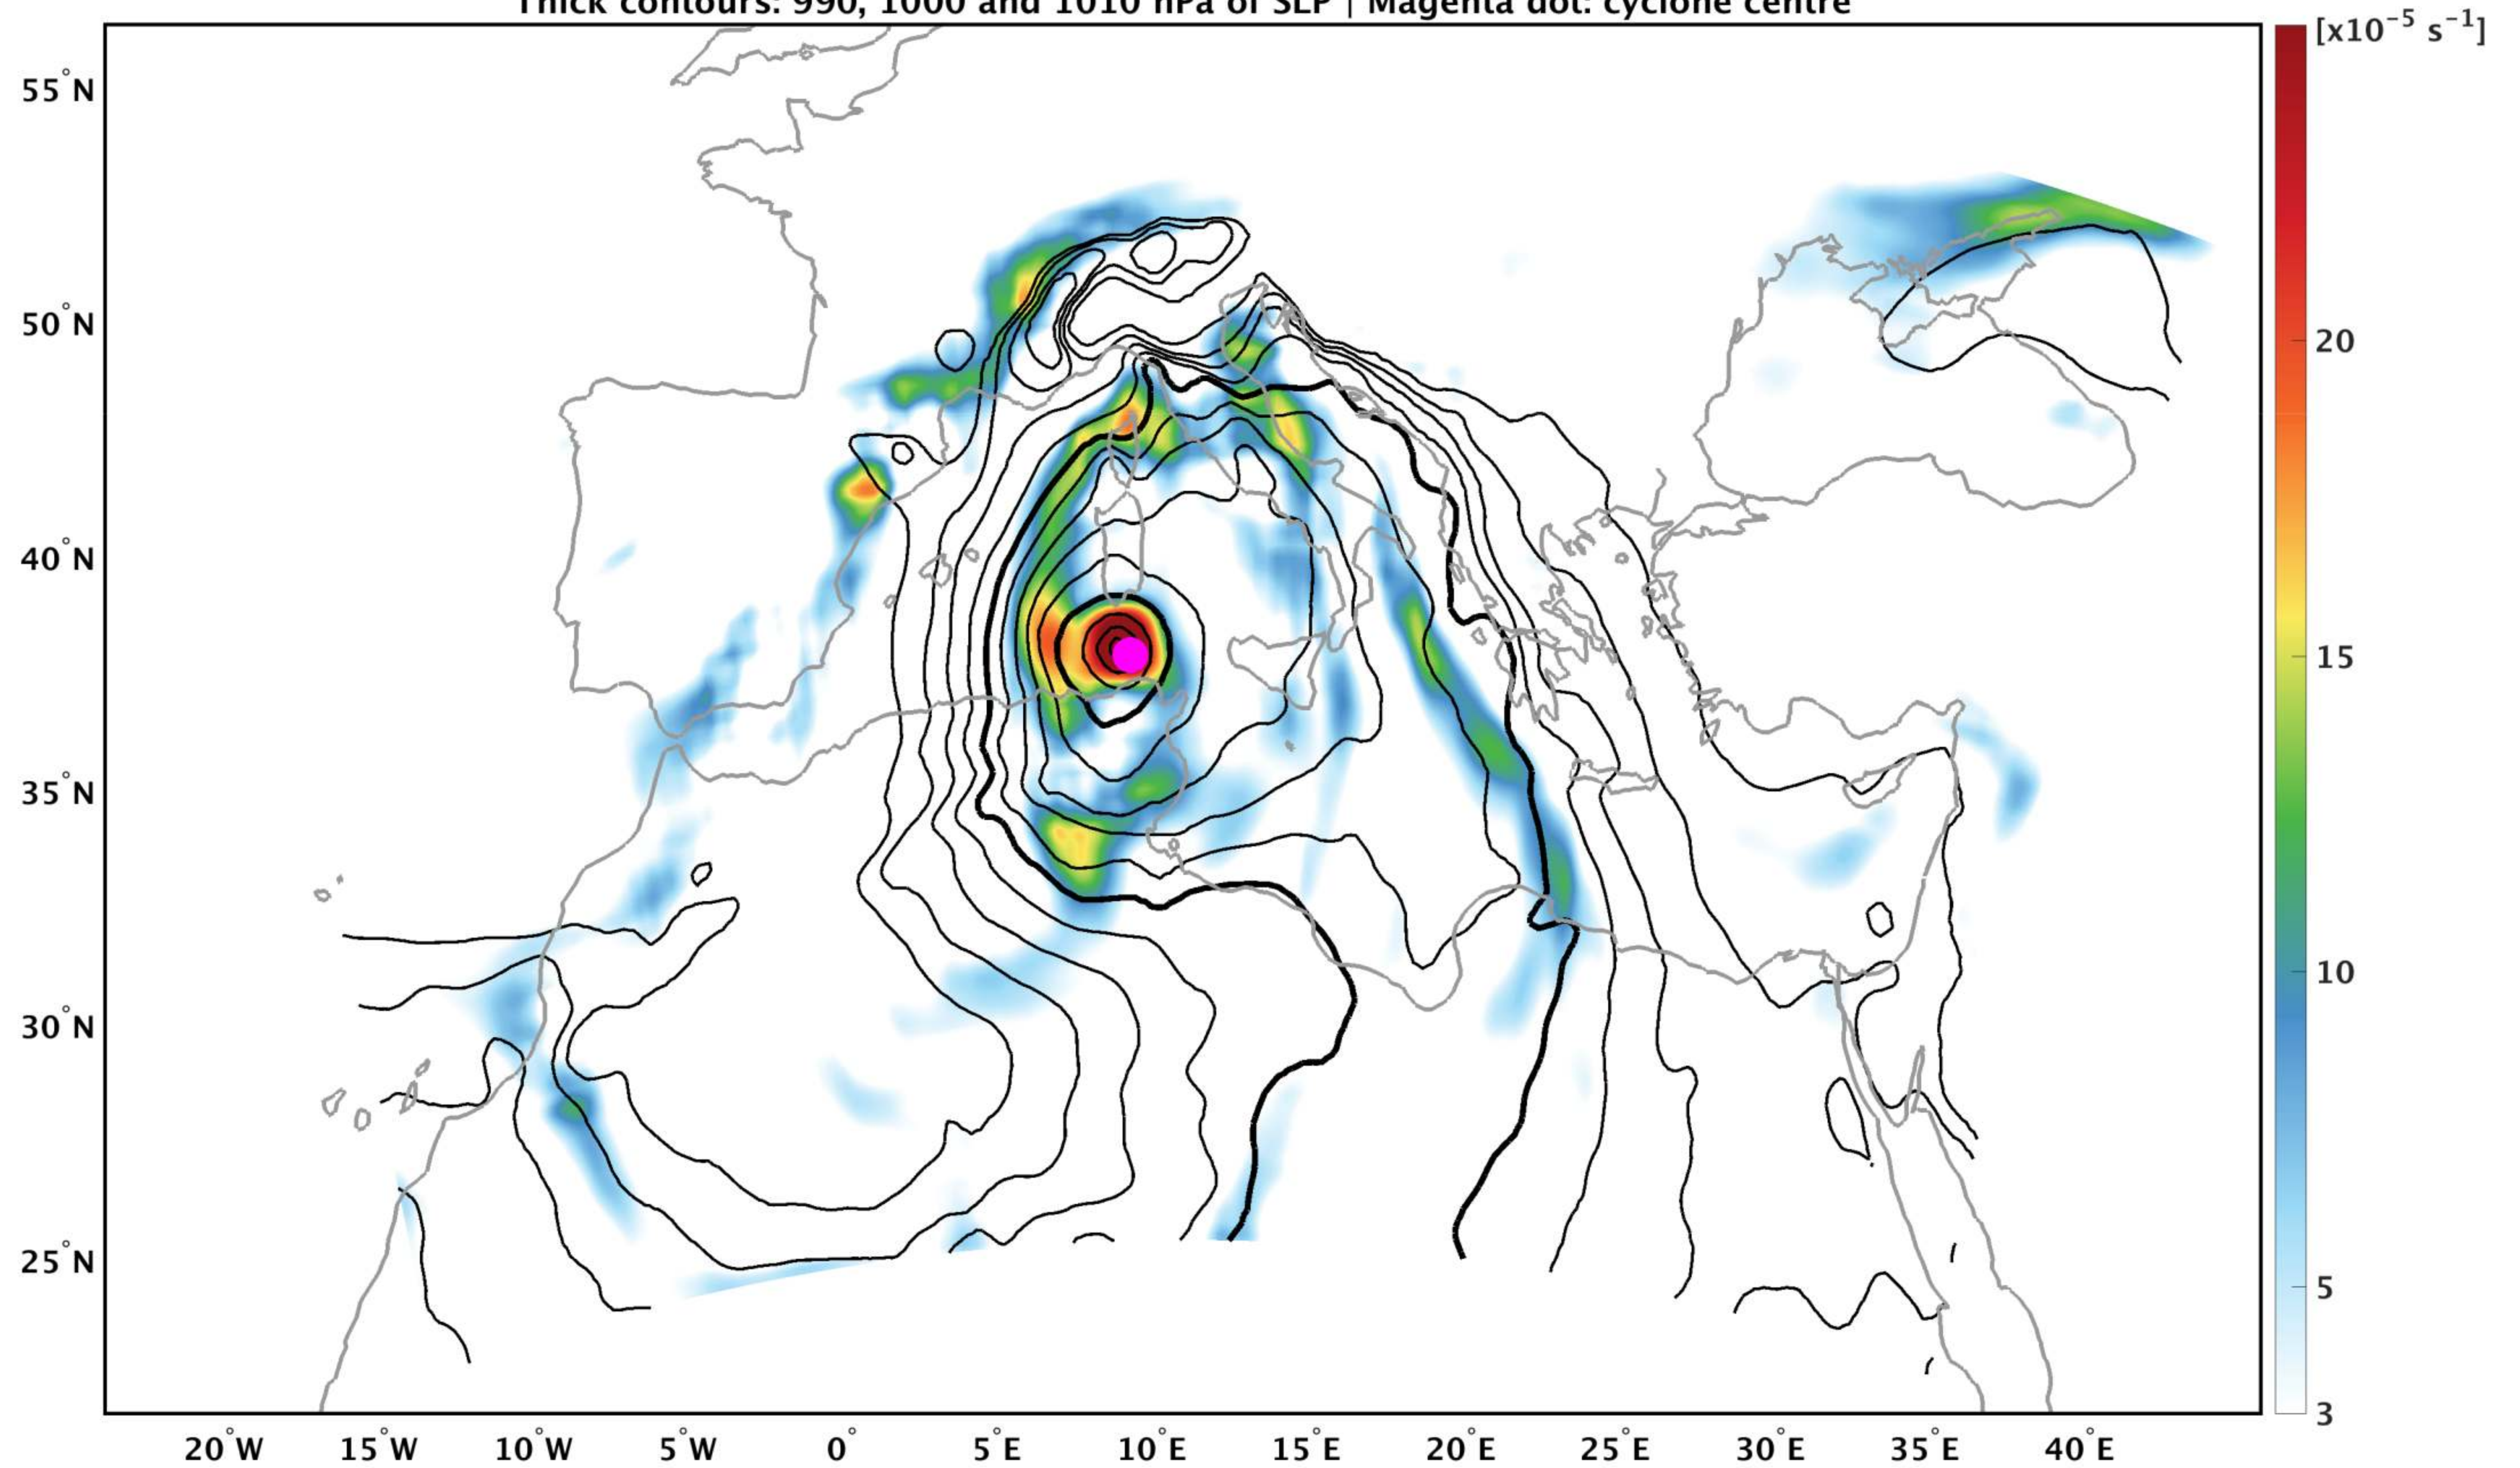



Case-18; Date: 23/2/2013

Colour: Relative vorticity ( $\times 10^{-5}$ ) | Contour: SLP (from 1018 hPa with an interval of 2 hPa)

Thick contours: 990, 1000 and 1010 hPa of SLP | Magenta dot: cyclone centre

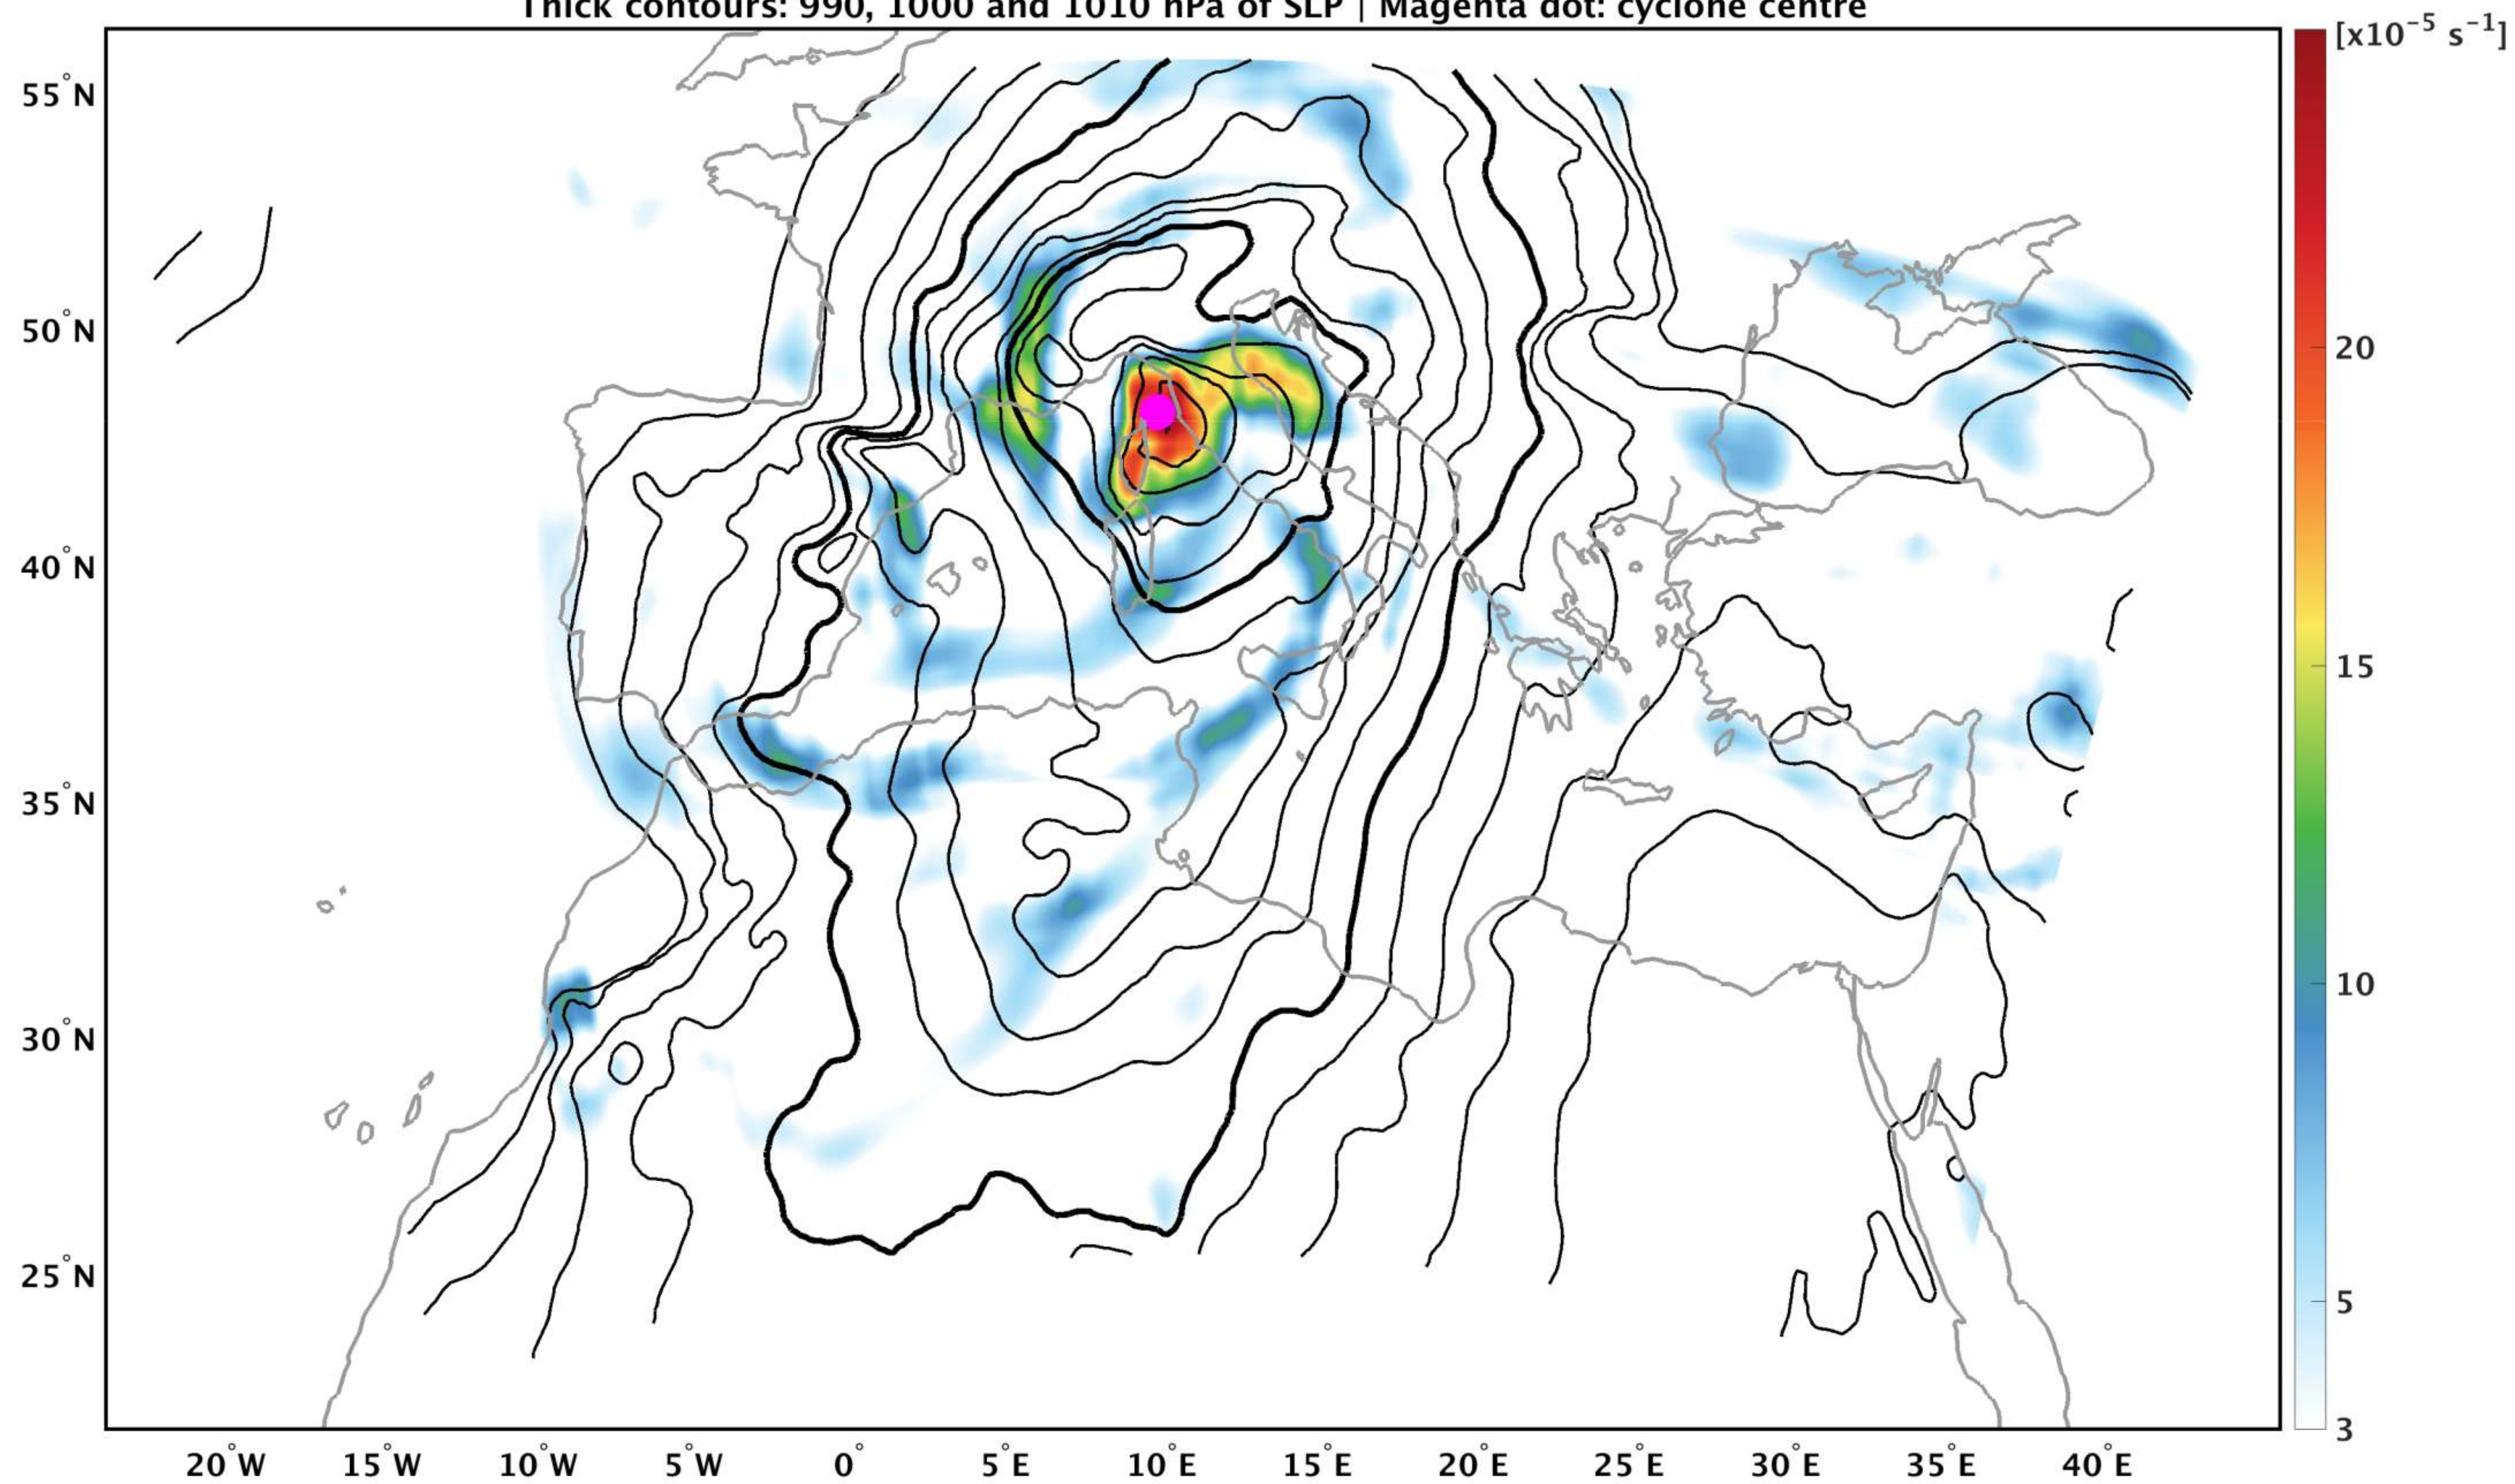



Case-19; Date: 26/1/2013

Colour: Relative vorticity ( $\times 10^{-5}$ ) | Contour: SLP (from 1018 hPa with an interval of 2 hPa)

Thick contours: 990, 1000 and 1010 hPa of SLP | Magenta dot: cyclone centre

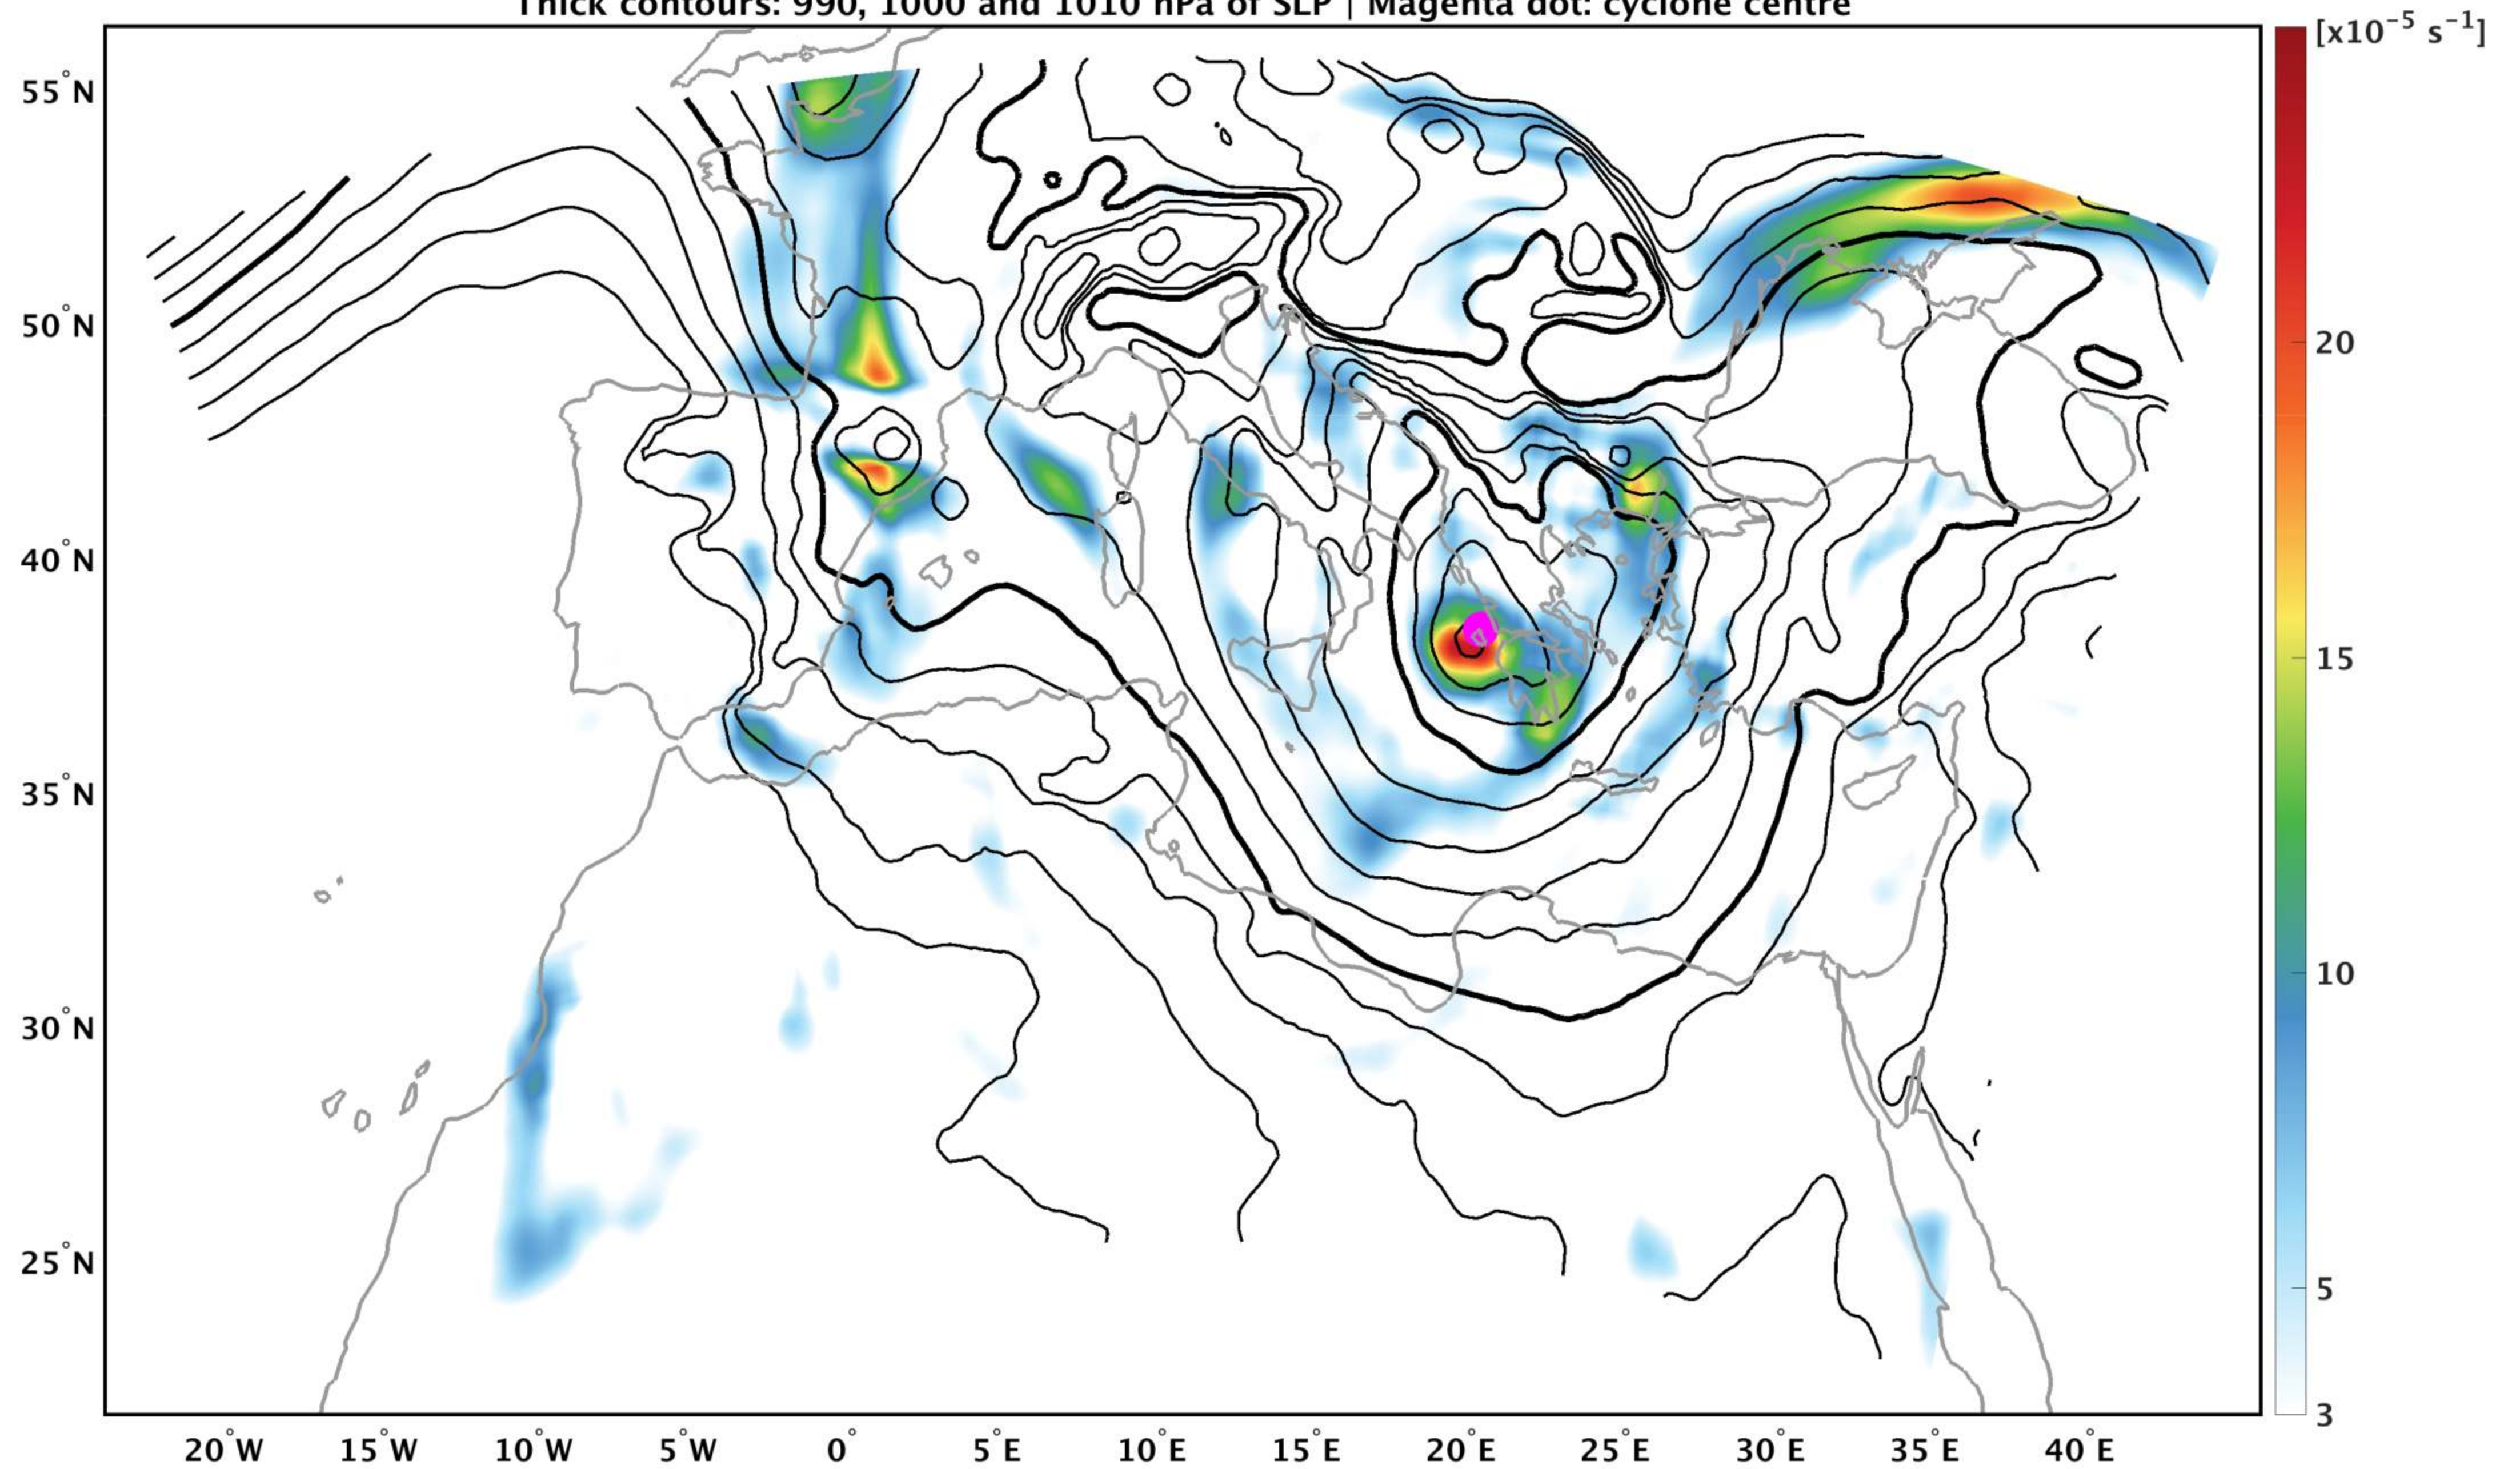



Case-20; Date: 26/11/2015

Colour: Relative vorticity ( $\times 10^{-5}$ ) | Contour: SLP (from 1018 hPa with an interval of 2 hPa)

Thick contours: 990, 1000 and 1010 hPa of SLP | Magenta dot: cyclone centre

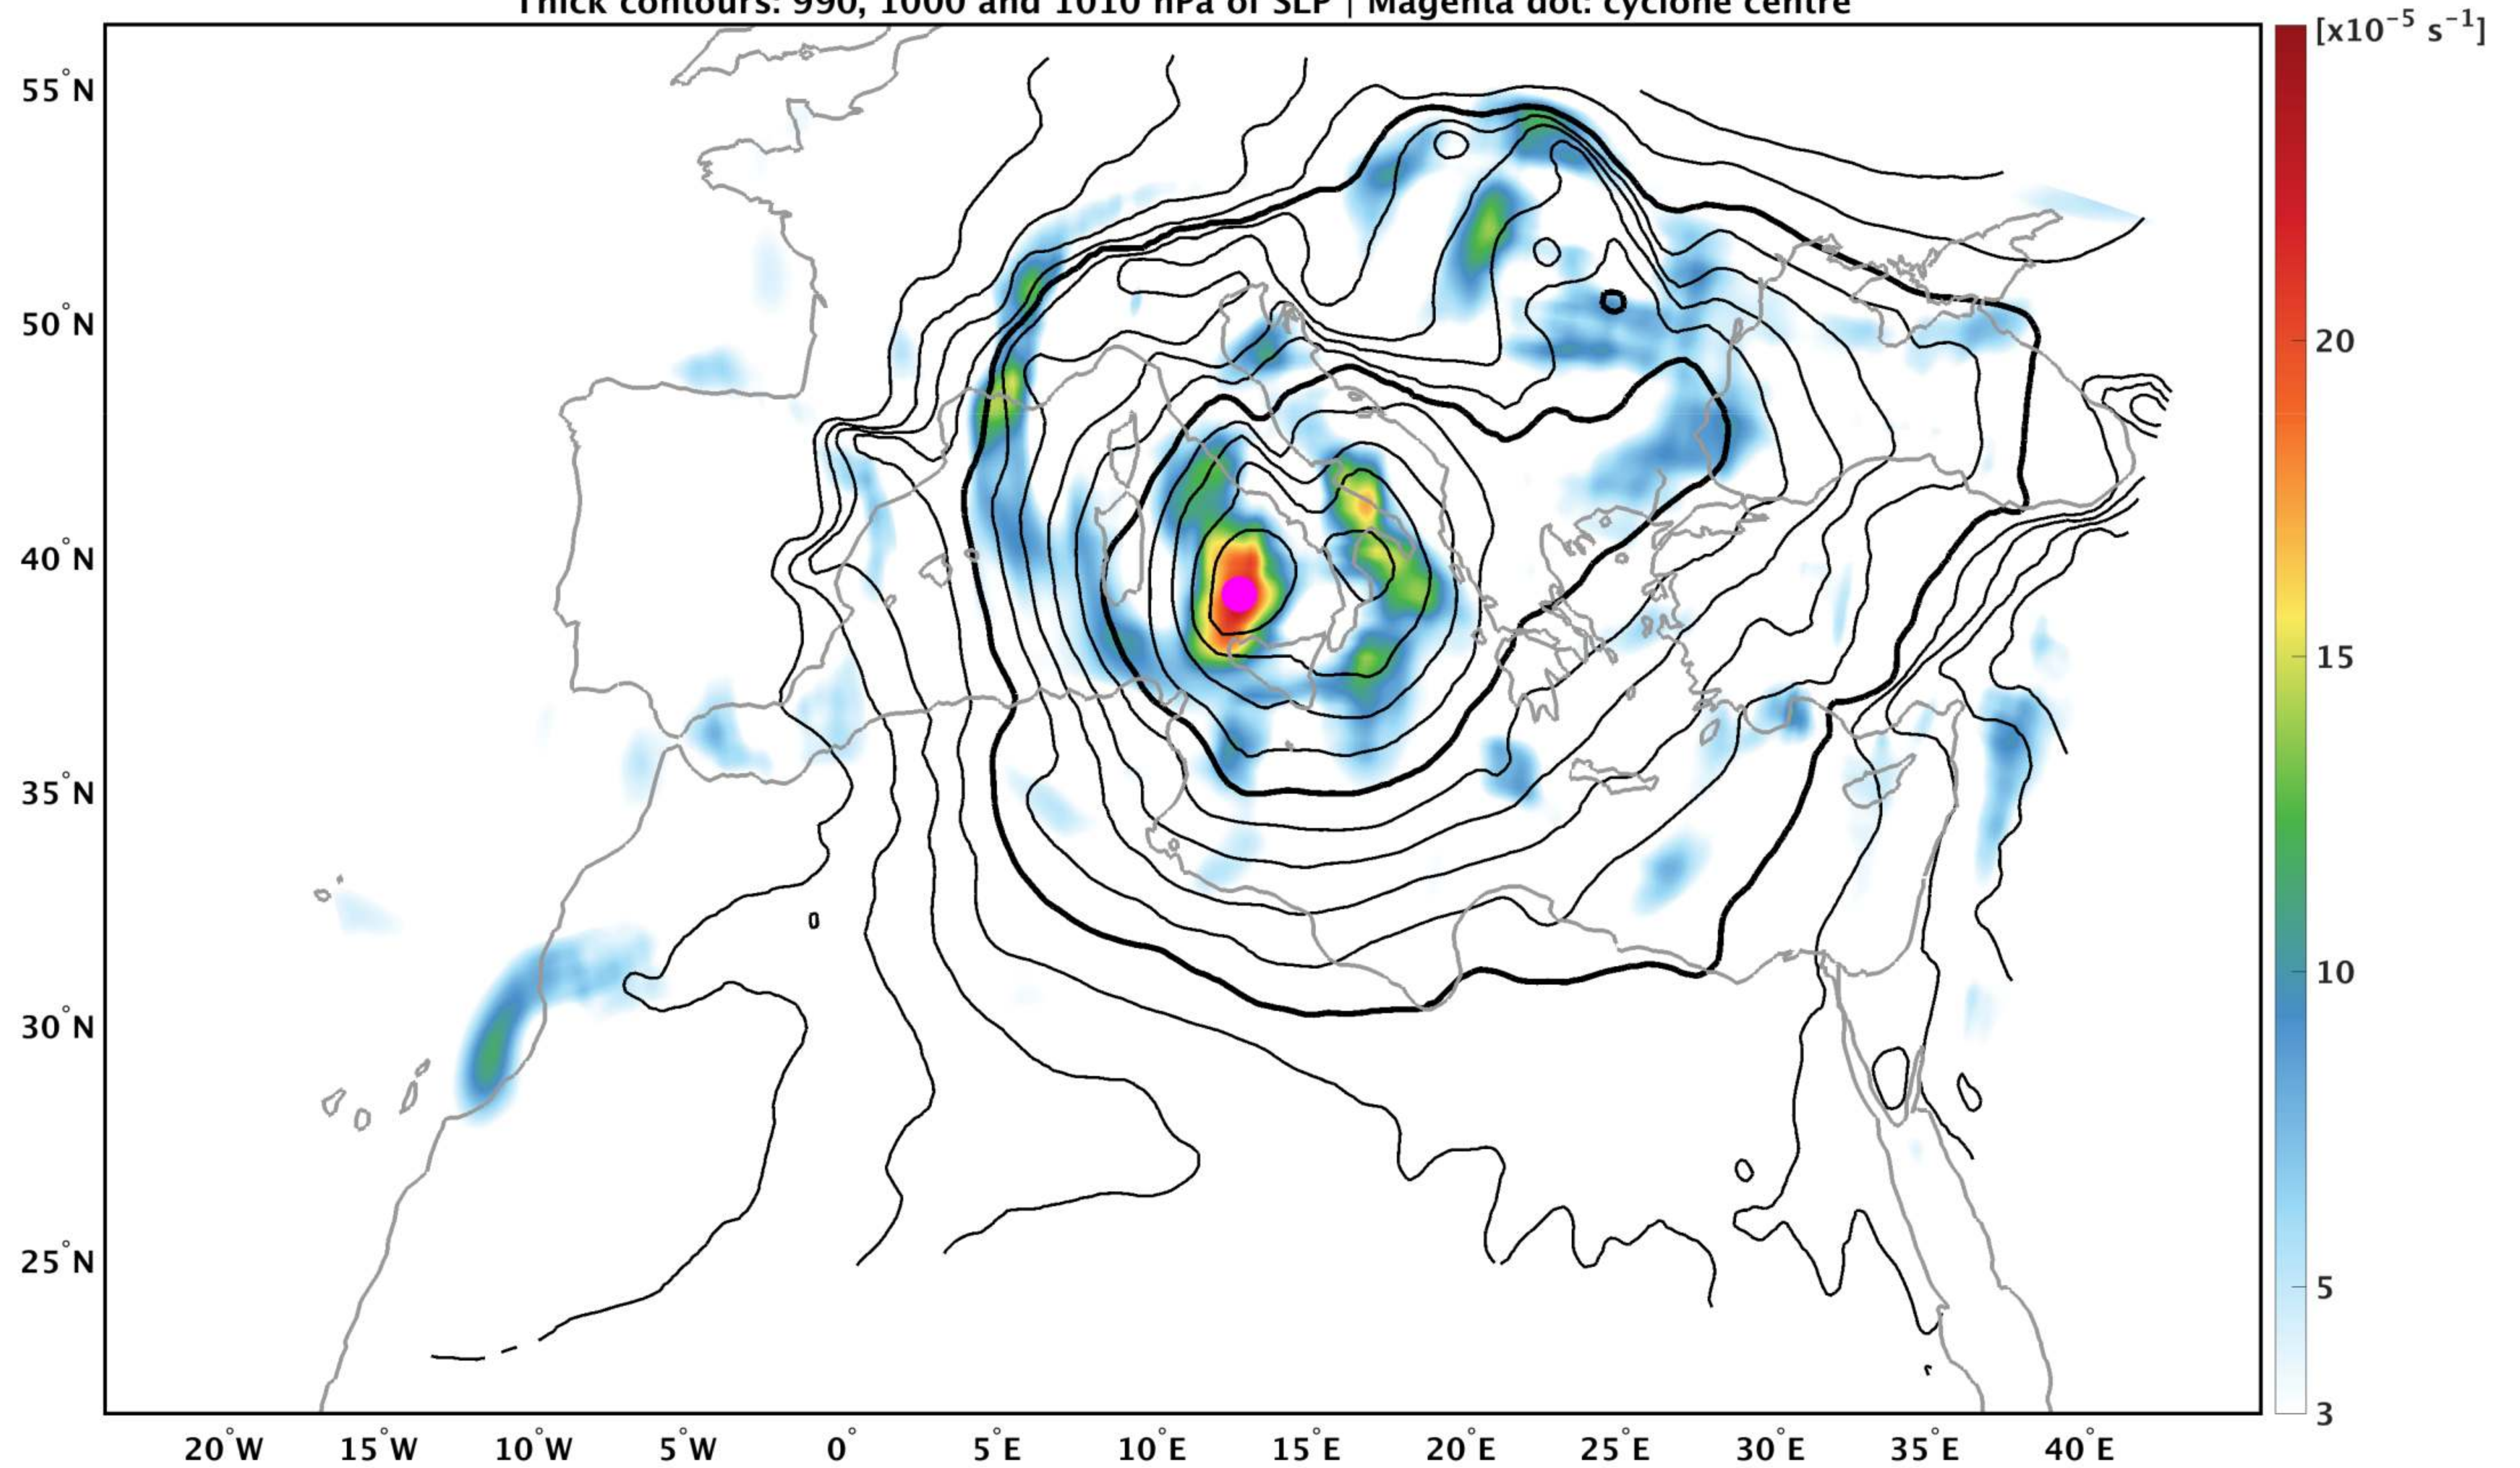



Case-21; Date: 4/4/2014

Colour: Relative vorticity ( $\times 10^{-5}$ ) | Contour: SLP (from 1018 hPa with an interval of 2 hPa)

Thick contours: 990, 1000 and 1010 hPa of SLP | Magenta dot: cyclone centre

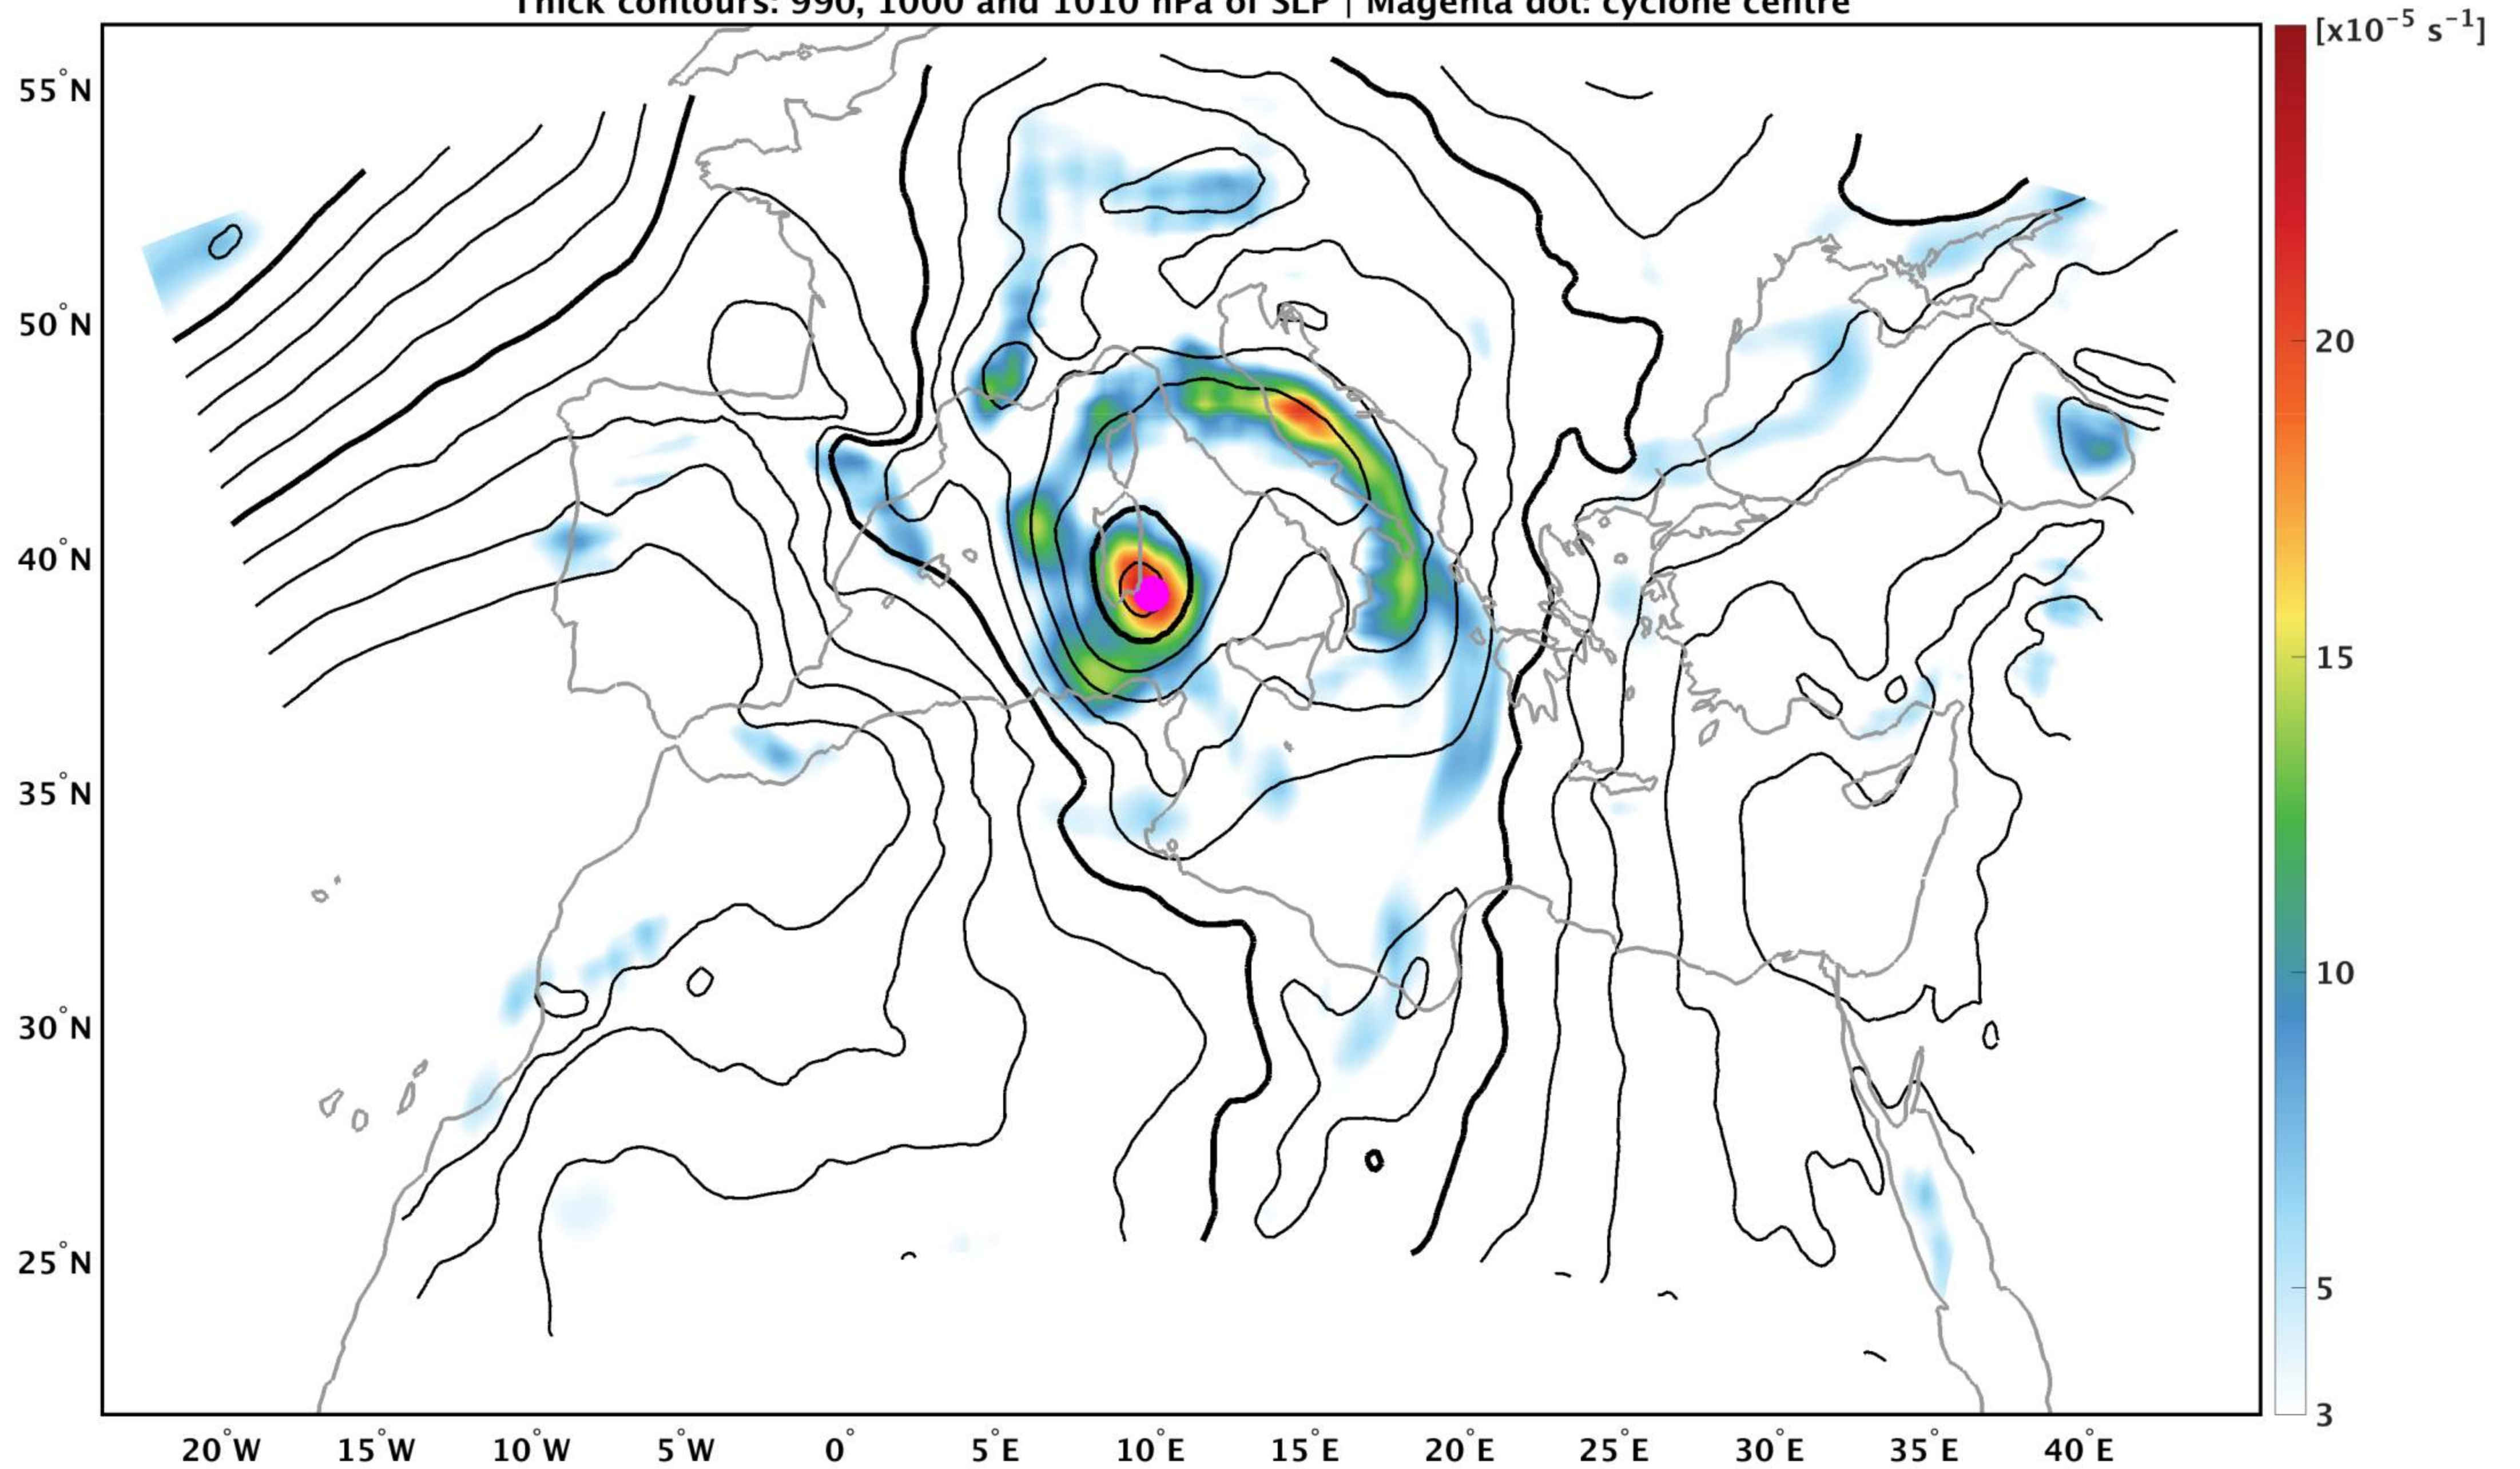



Case-22; Date: 9/3/2010

Colour: Relative vorticity ( $\times 10^{-5}$ ) | Contour: SLP (from 1018 hPa with an interval of 2 hPa)

Thick contours: 990, 1000 and 1010 hPa of SLP | Magenta dot: cyclone centre

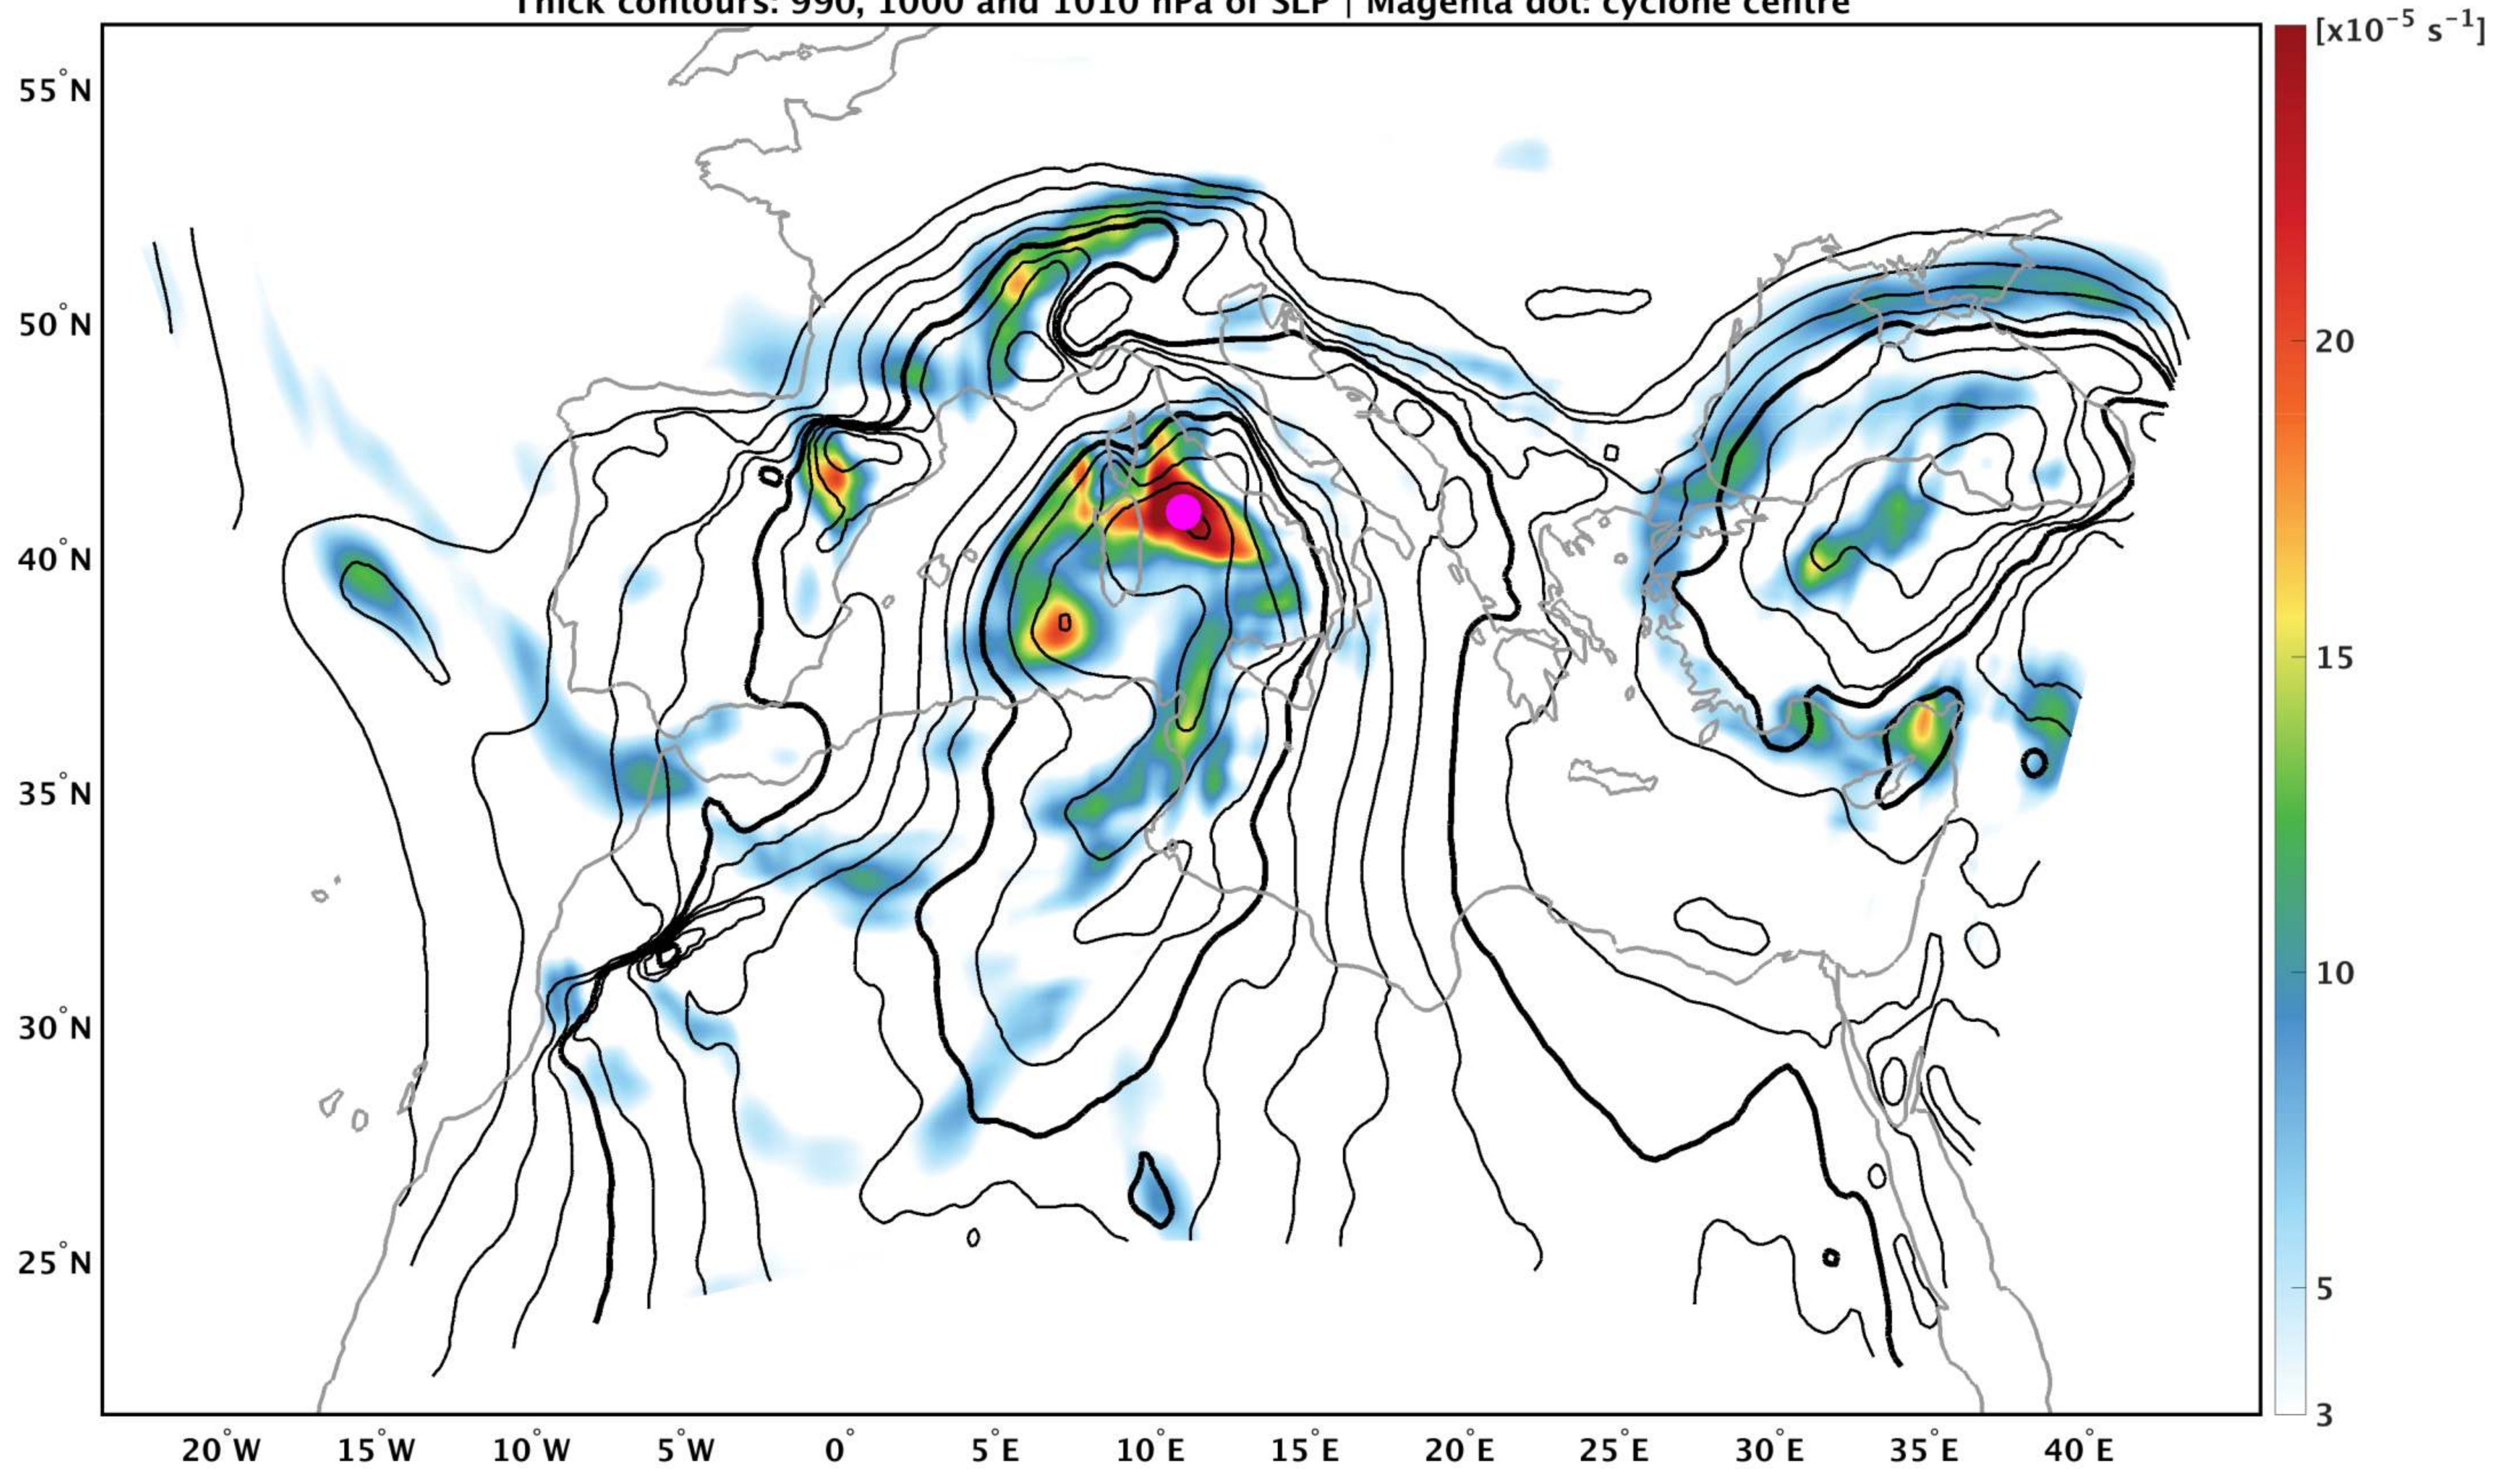



Case-23; Date: 23/5/2013

Colour: Relative vorticity ( $\times 10^{-5}$ ) | Contour: SLP (from 1018 hPa with an interval of 2 hPa)

Thick contours: 990, 1000 and 1010 hPa of SLP | Magenta dot: cyclone centre

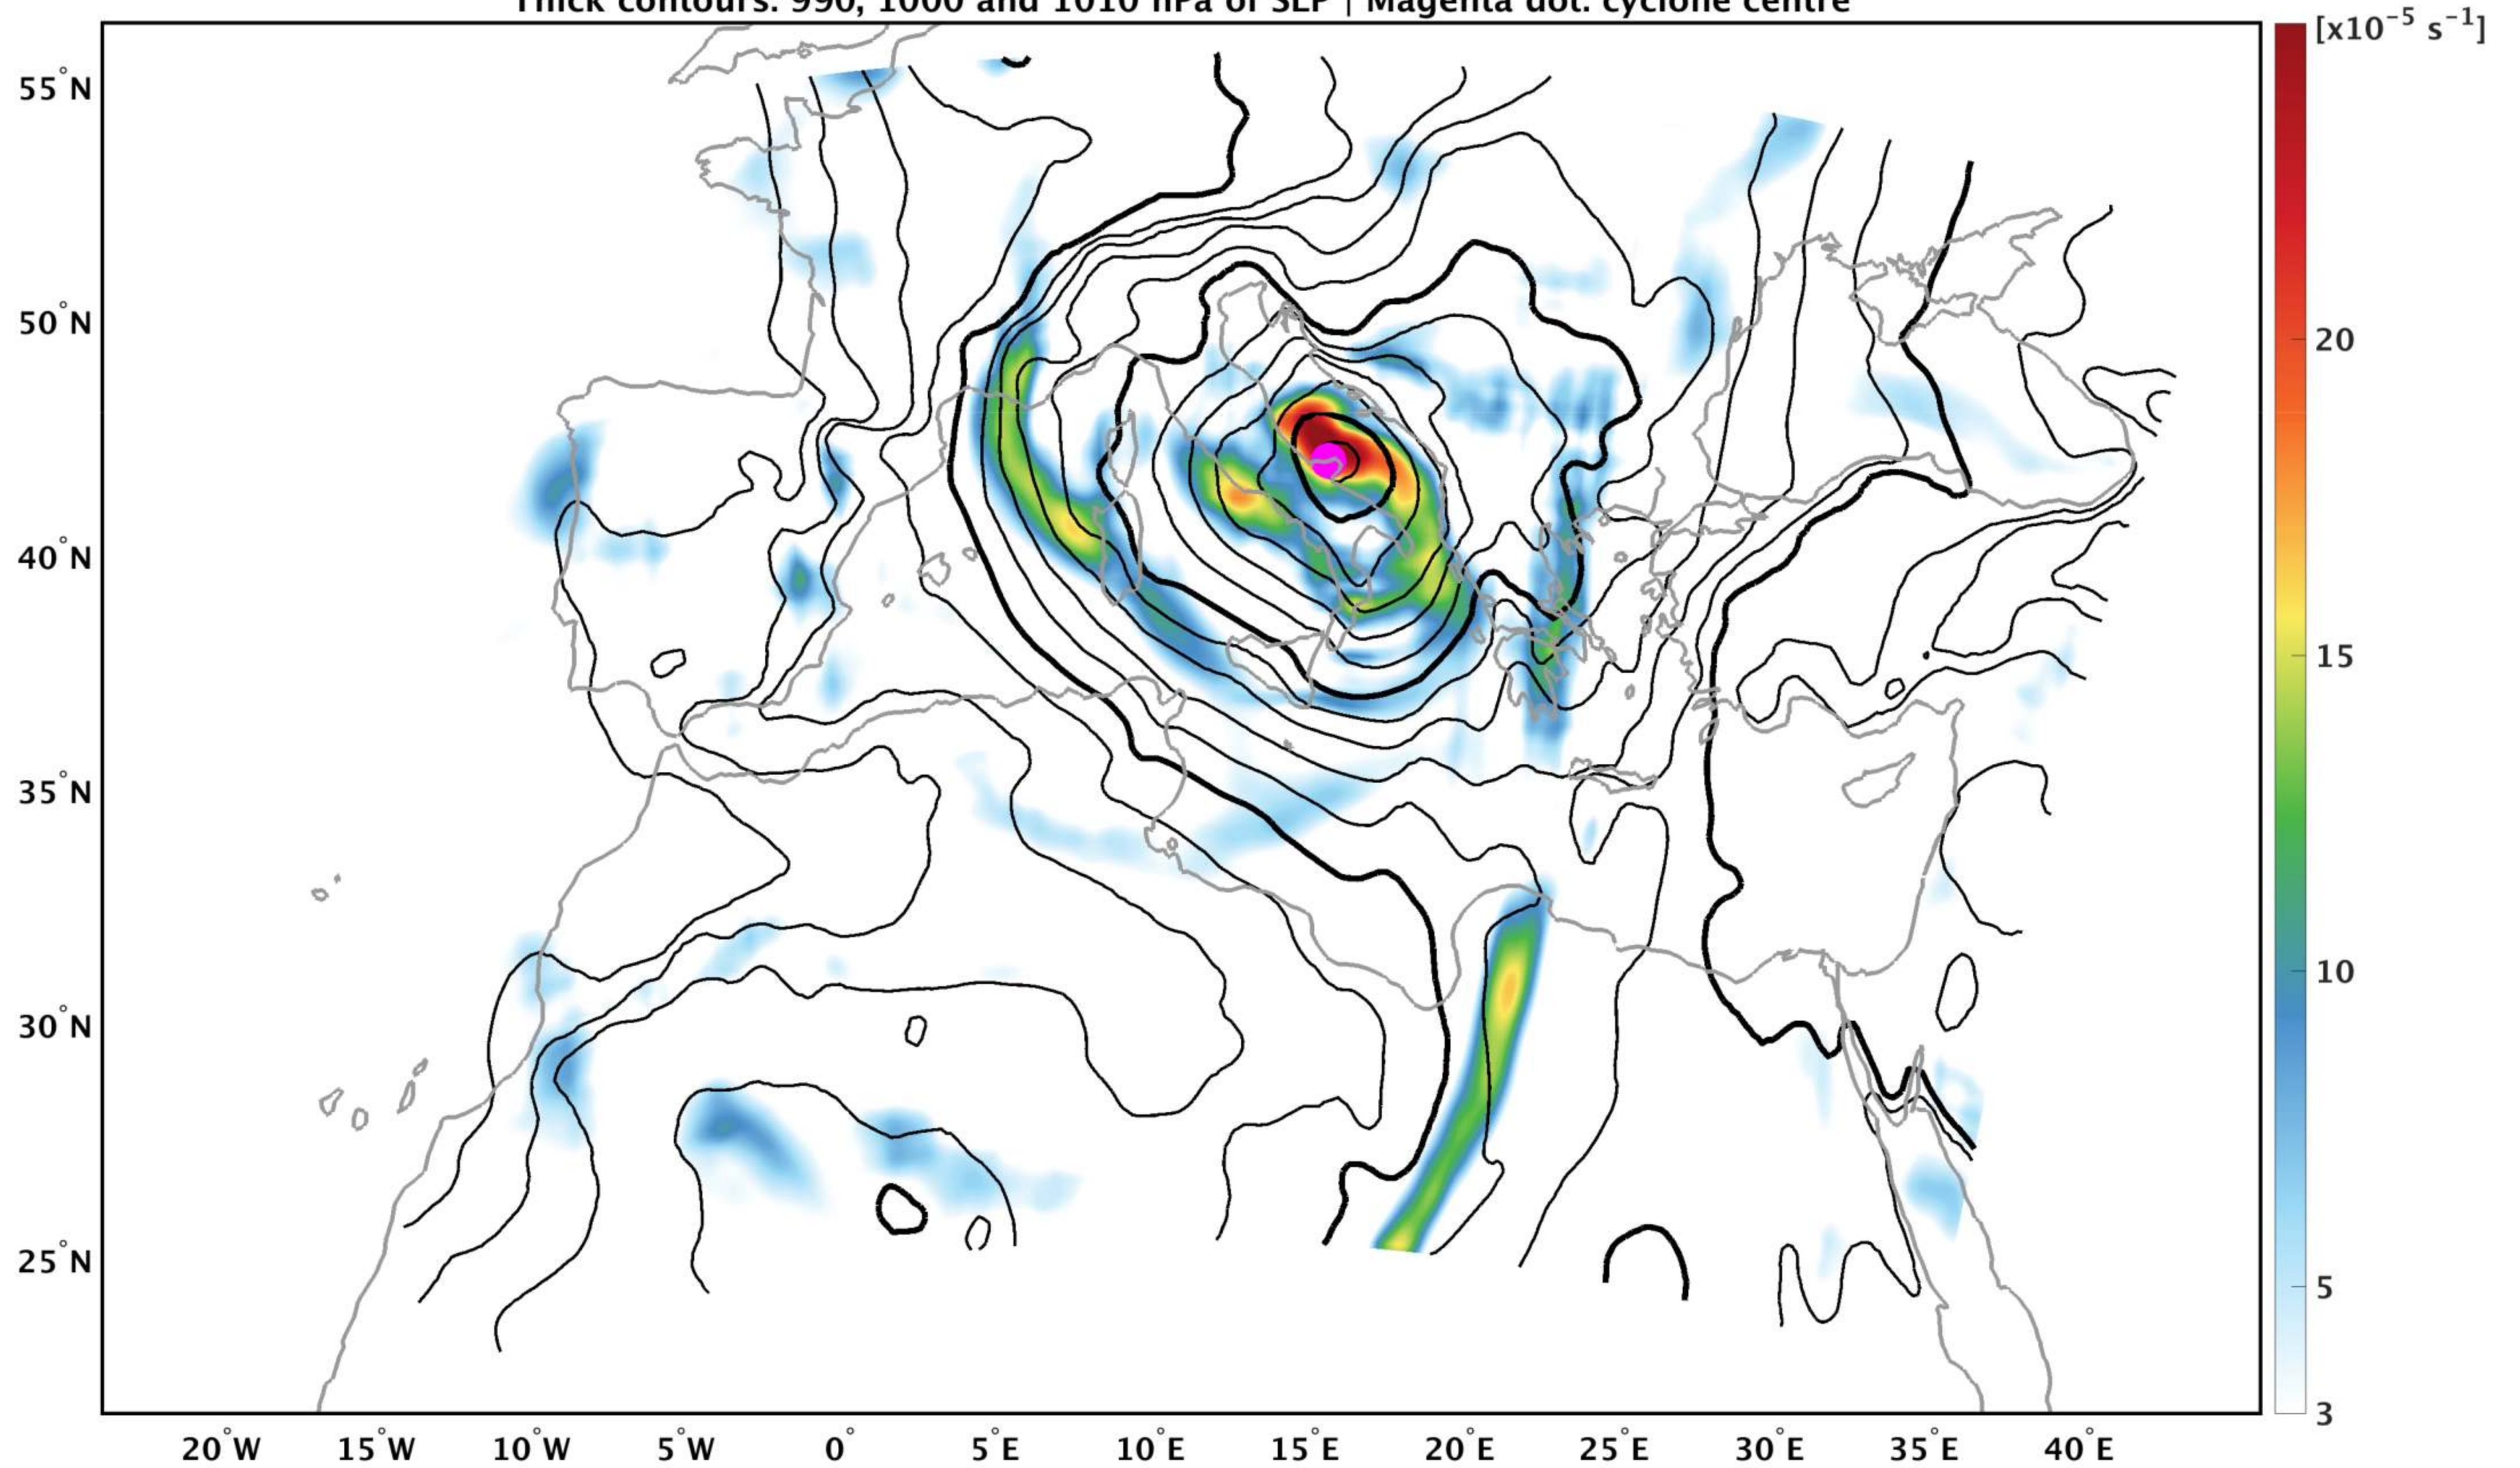



Case-24; Date: 4/12/2008

Colour: Relative vorticity ( $\times 10^{-5}$ ) | Contour: SLP (from 1018 hPa with an interval of 2 hPa)

Thick contours: 990, 1000 and 1010 hPa of SLP | Magenta dot: cyclone centre

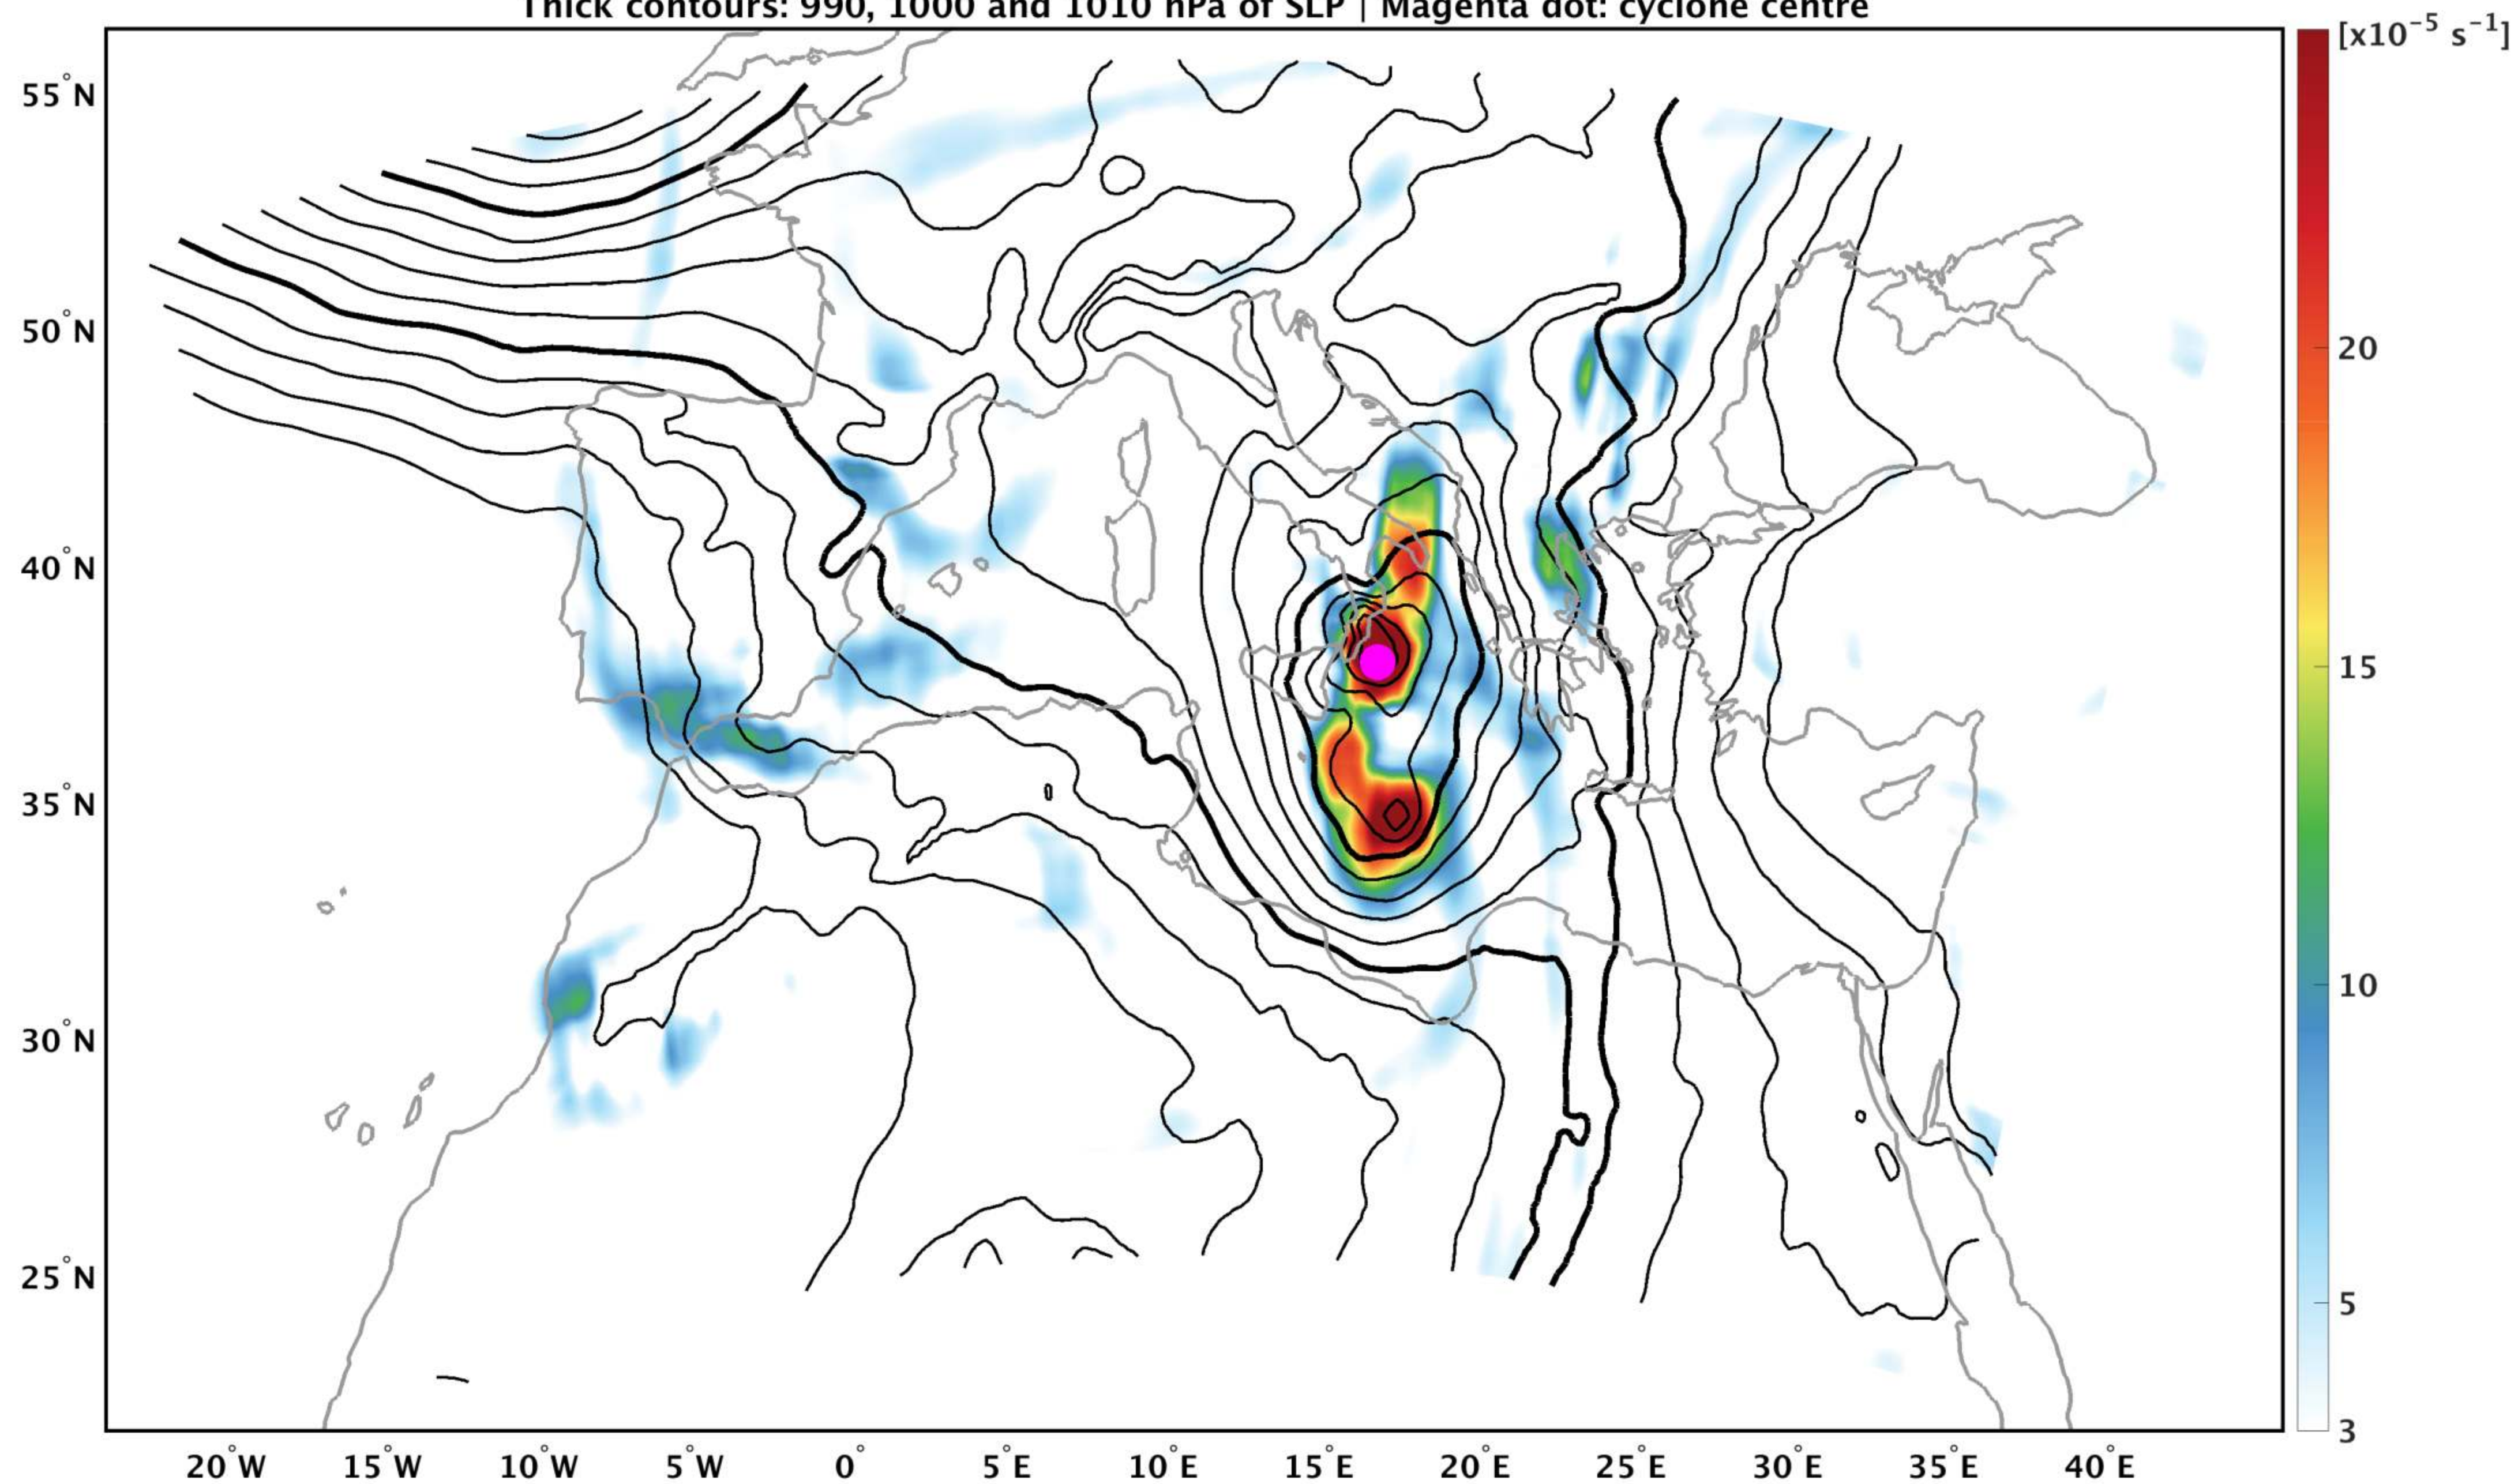



Case-25; Date: 3/6/2014

Colour: Relative vorticity ( $\times 10^{-5}$ ) | Contour: SLP (from 1018 hPa with an interval of 2 hPa)

Thick contours: 990, 1000 and 1010 hPa of SLP | Magenta dot: cyclone centre

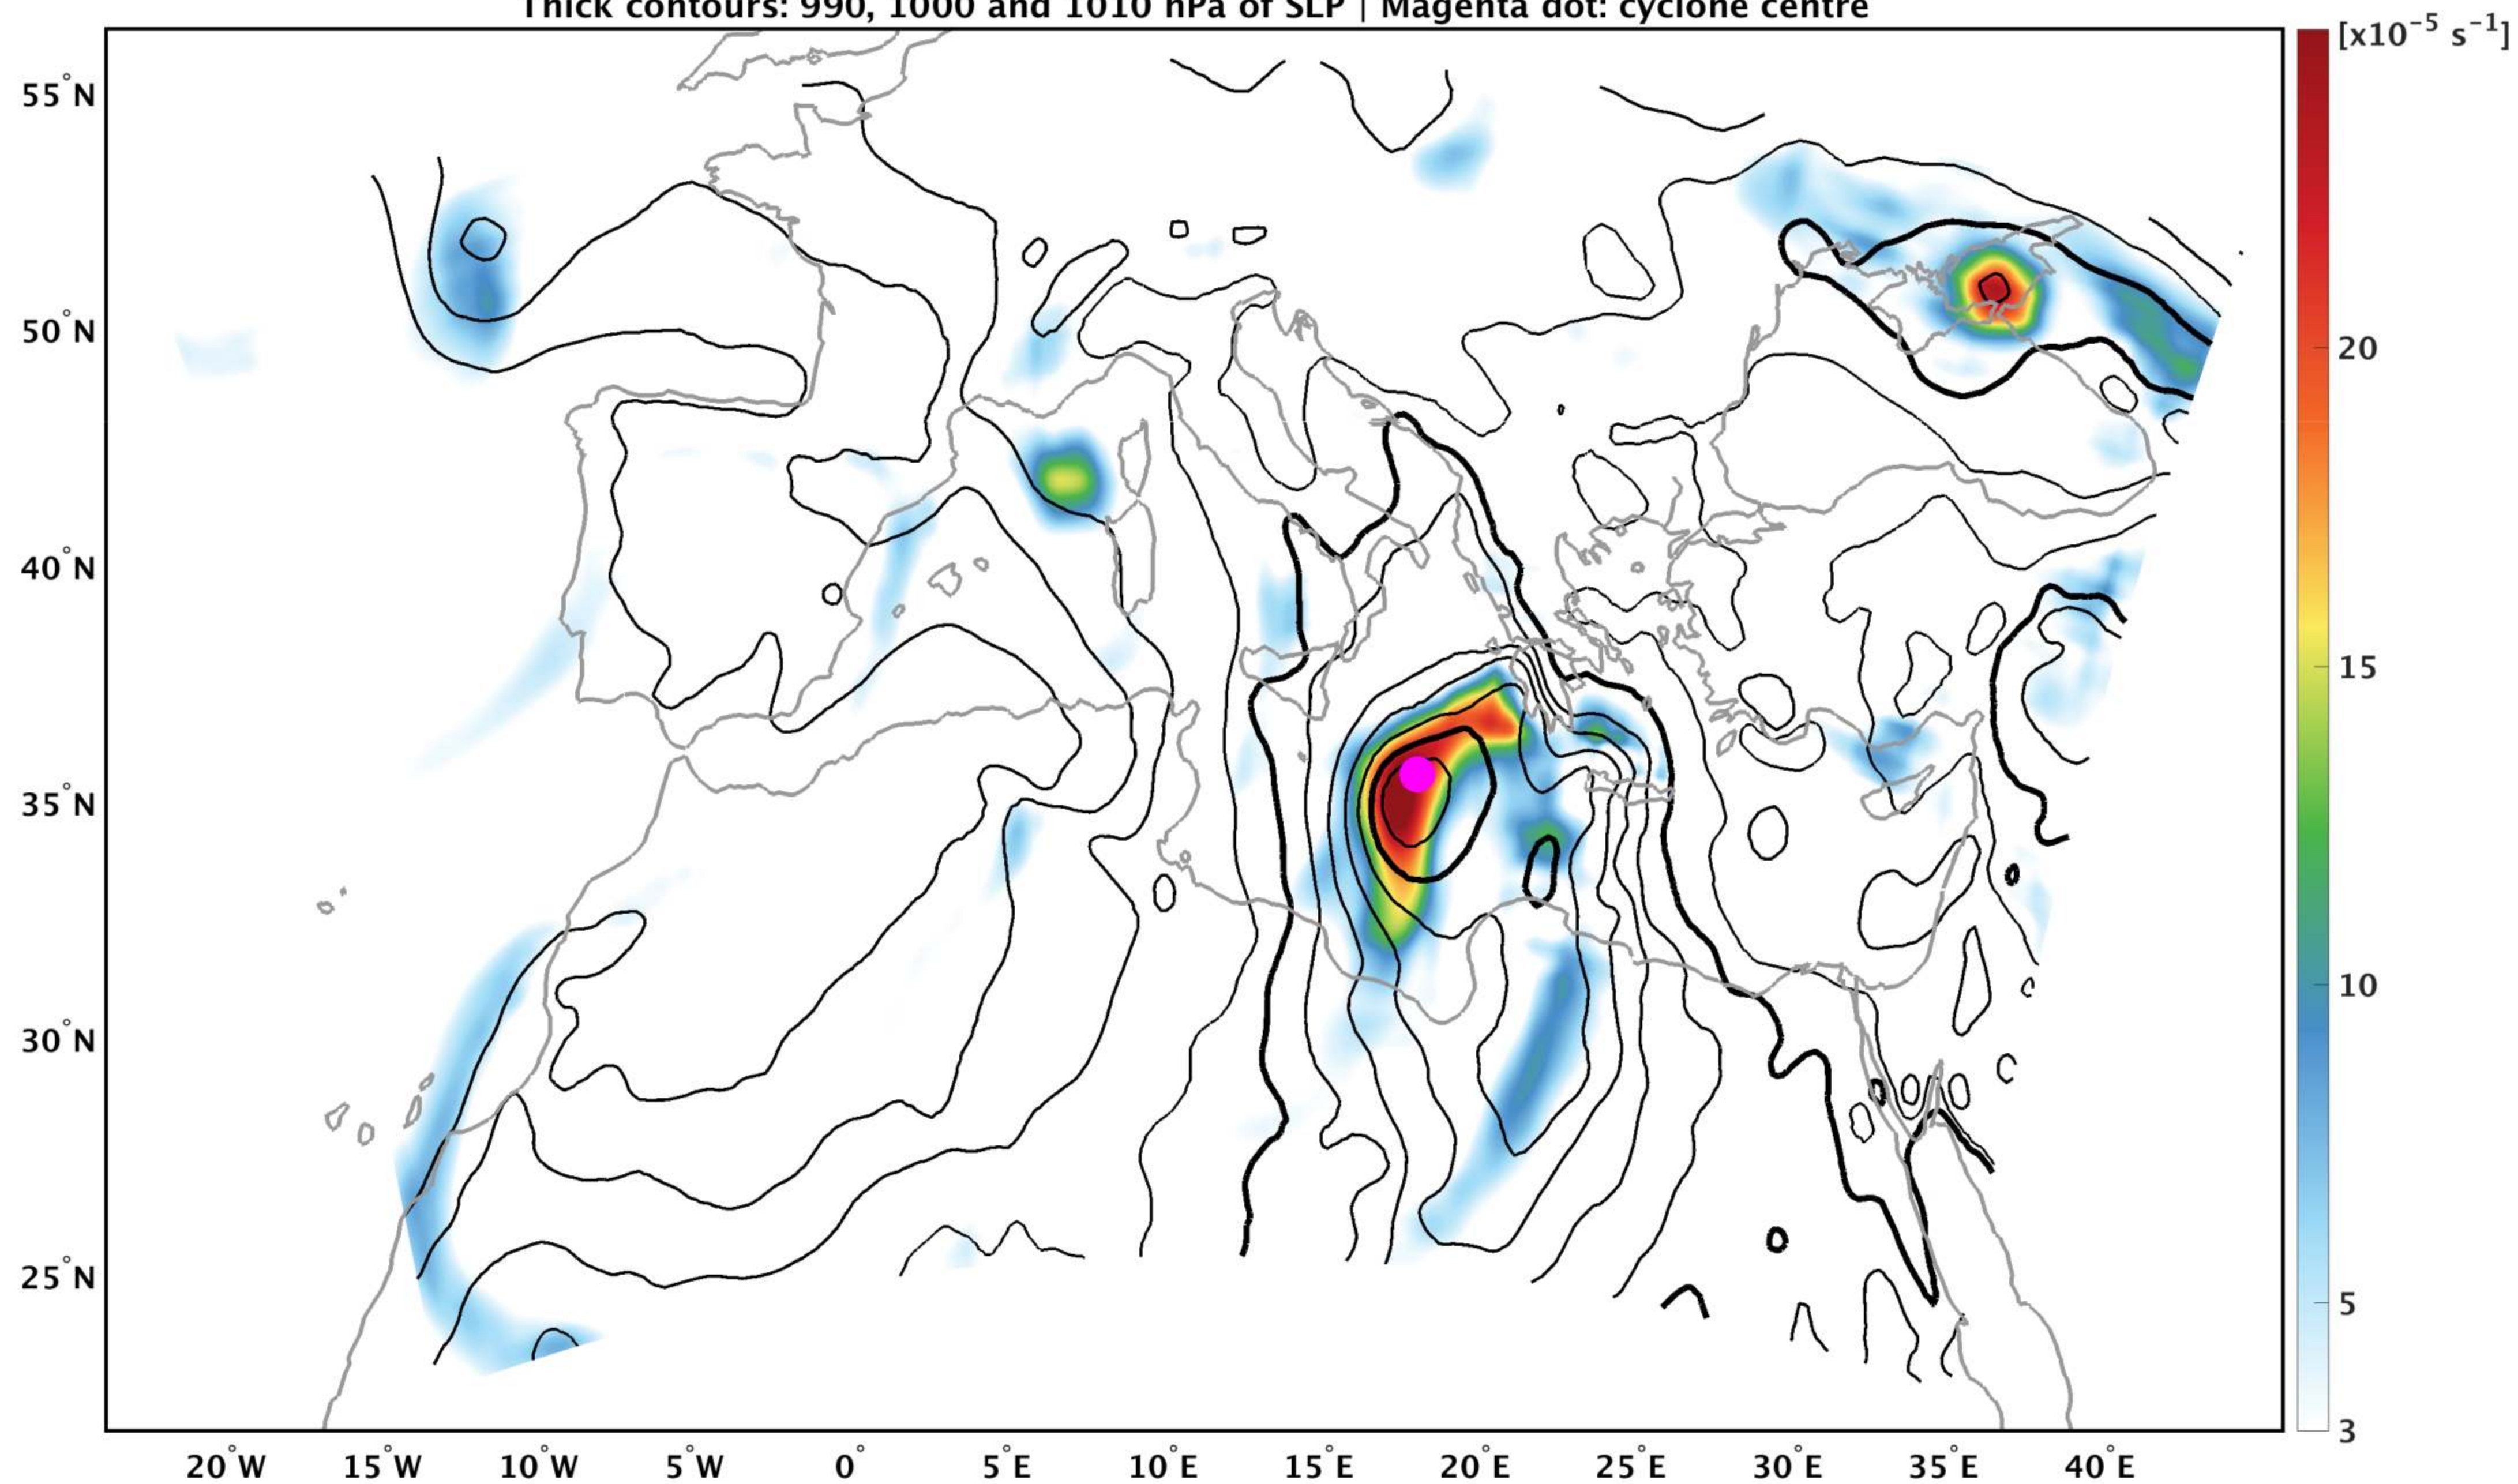



Case-26; Date: 6/11/2017

Colour: Relative vorticity ( $\times 10^{-5}$ ) | Contour: SLP (from 1018 hPa with an interval of 2 hPa)

Thick contours: 990, 1000 and 1010 hPa of SLP | Magenta dot: cyclone centre

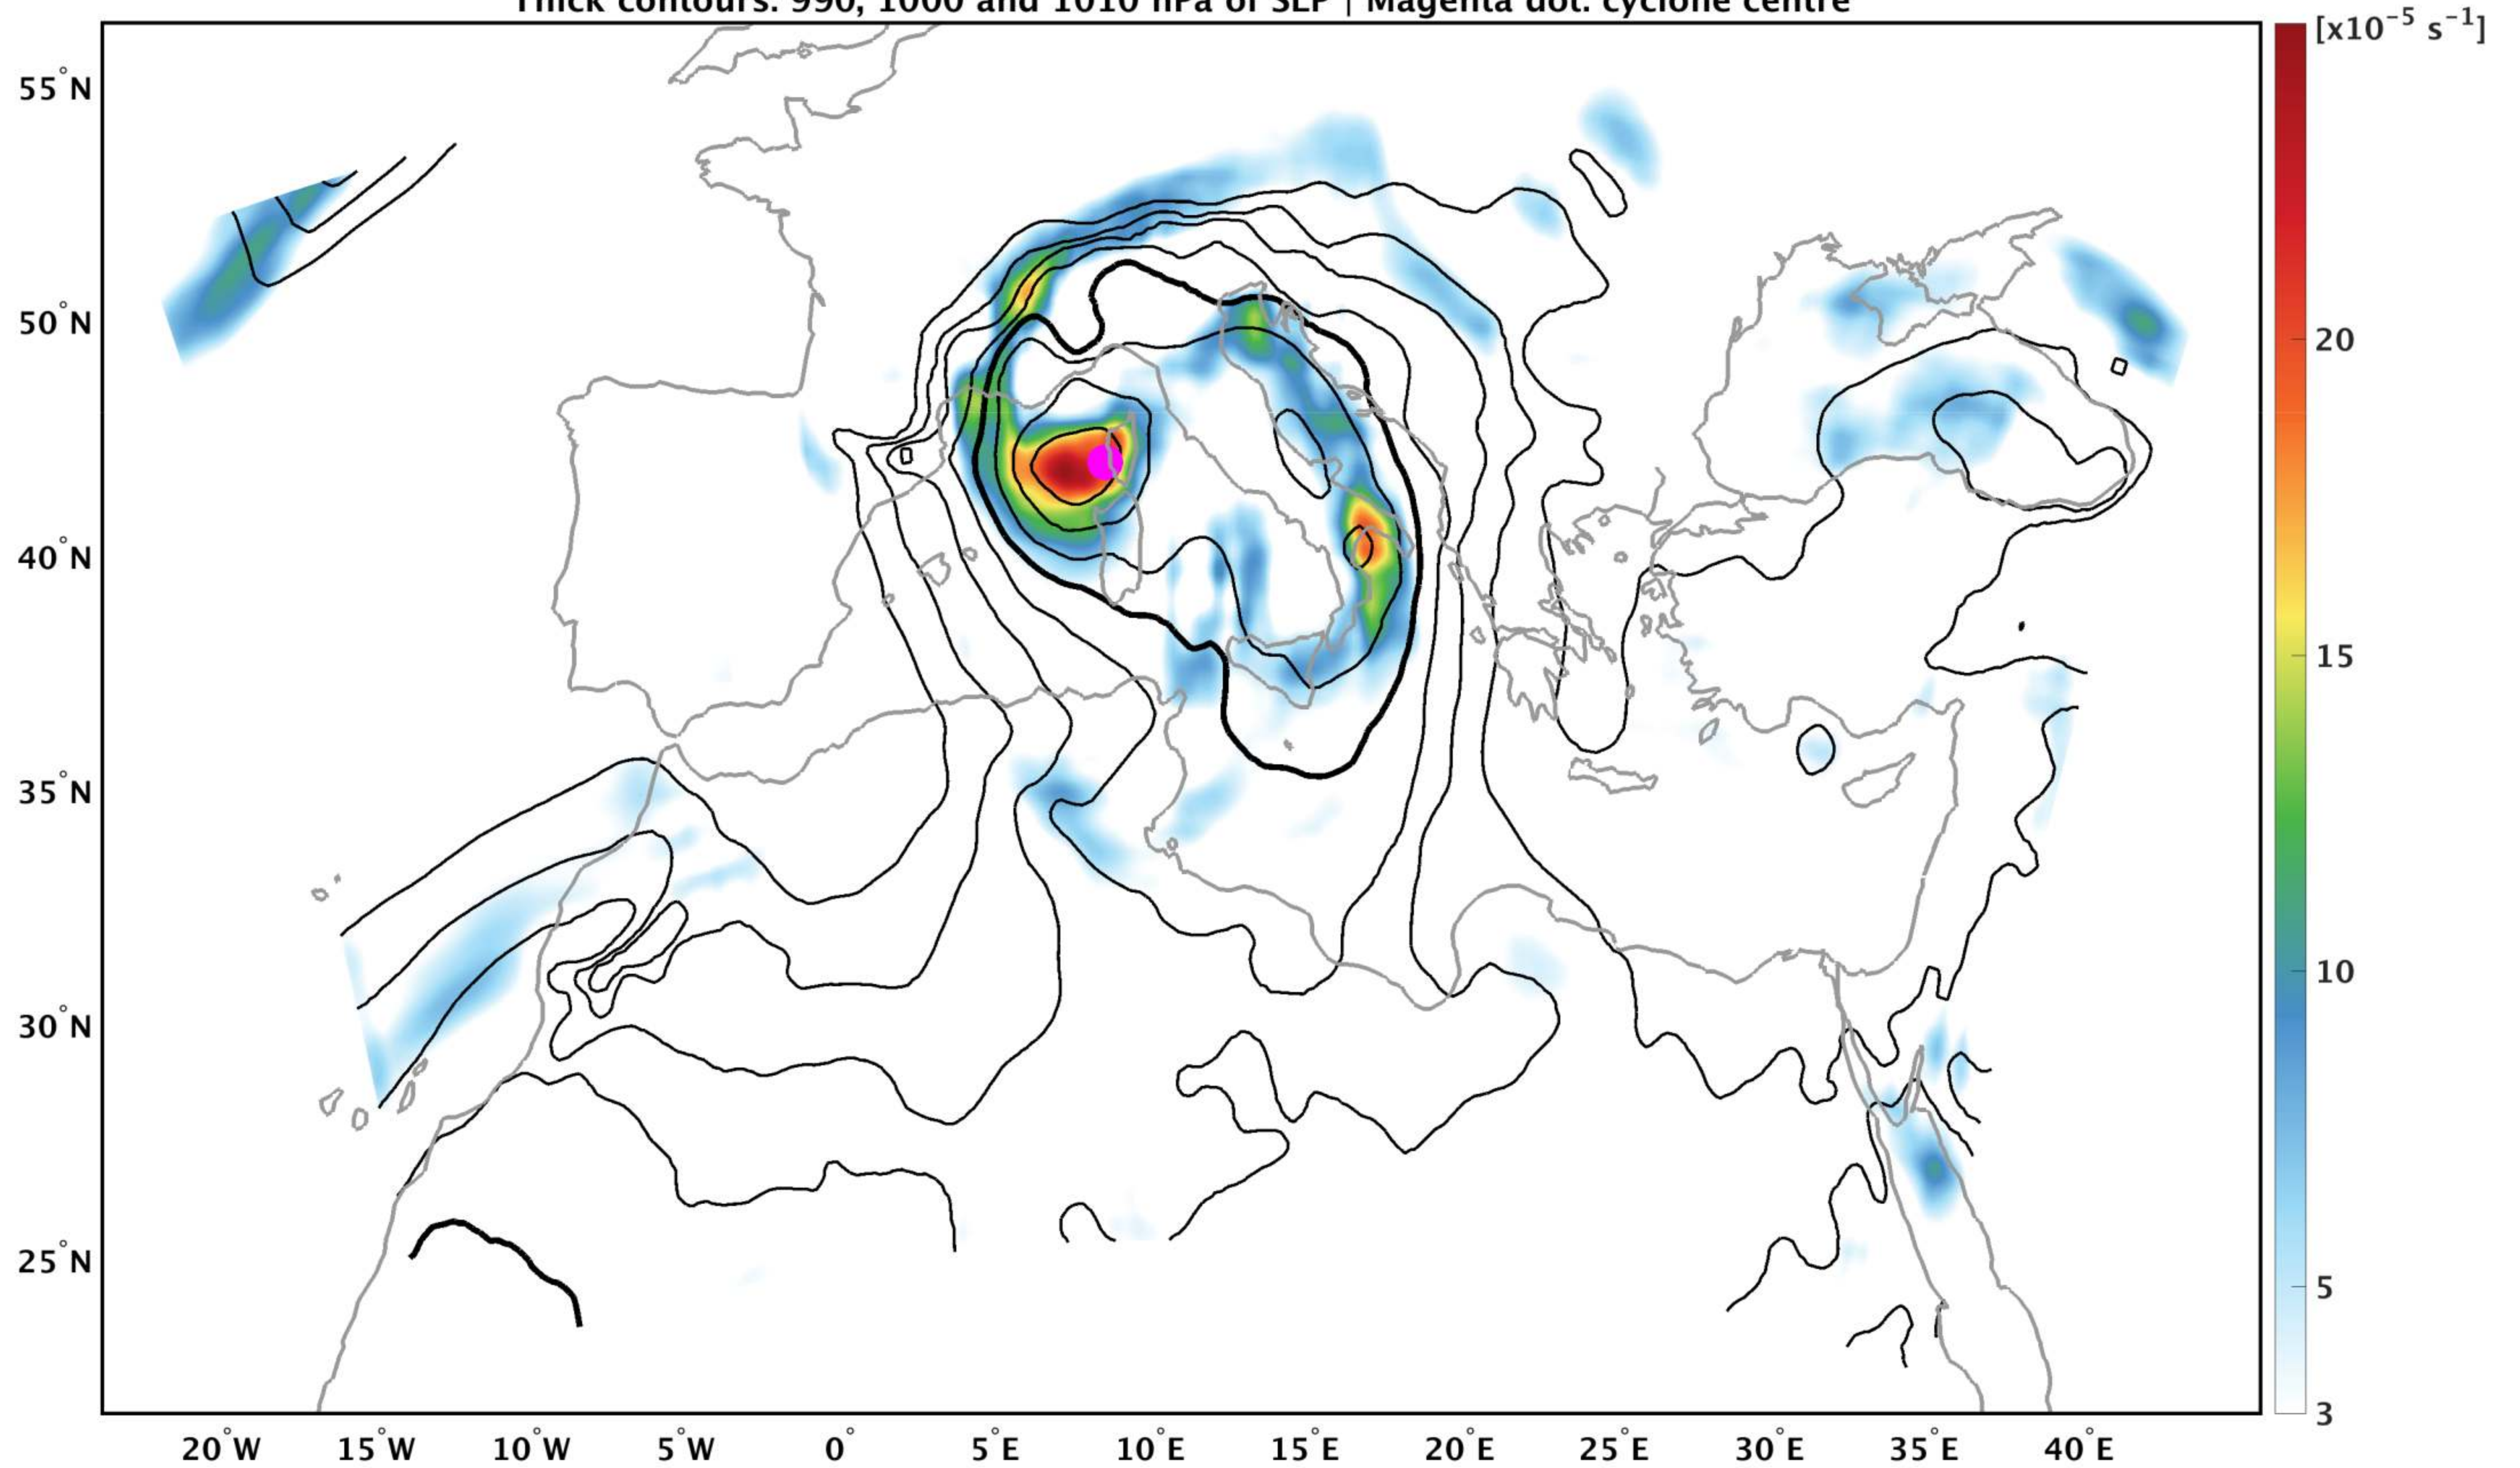



Case-27; Date: 10/5/2008

Colour: Relative vorticity ( $\times 10^{-5}$ ) | Contour: SLP (from 1018 hPa with an interval of 2 hPa)

Thick contours: 990, 1000 and 1010 hPa of SLP | Magenta dot: cyclone centre

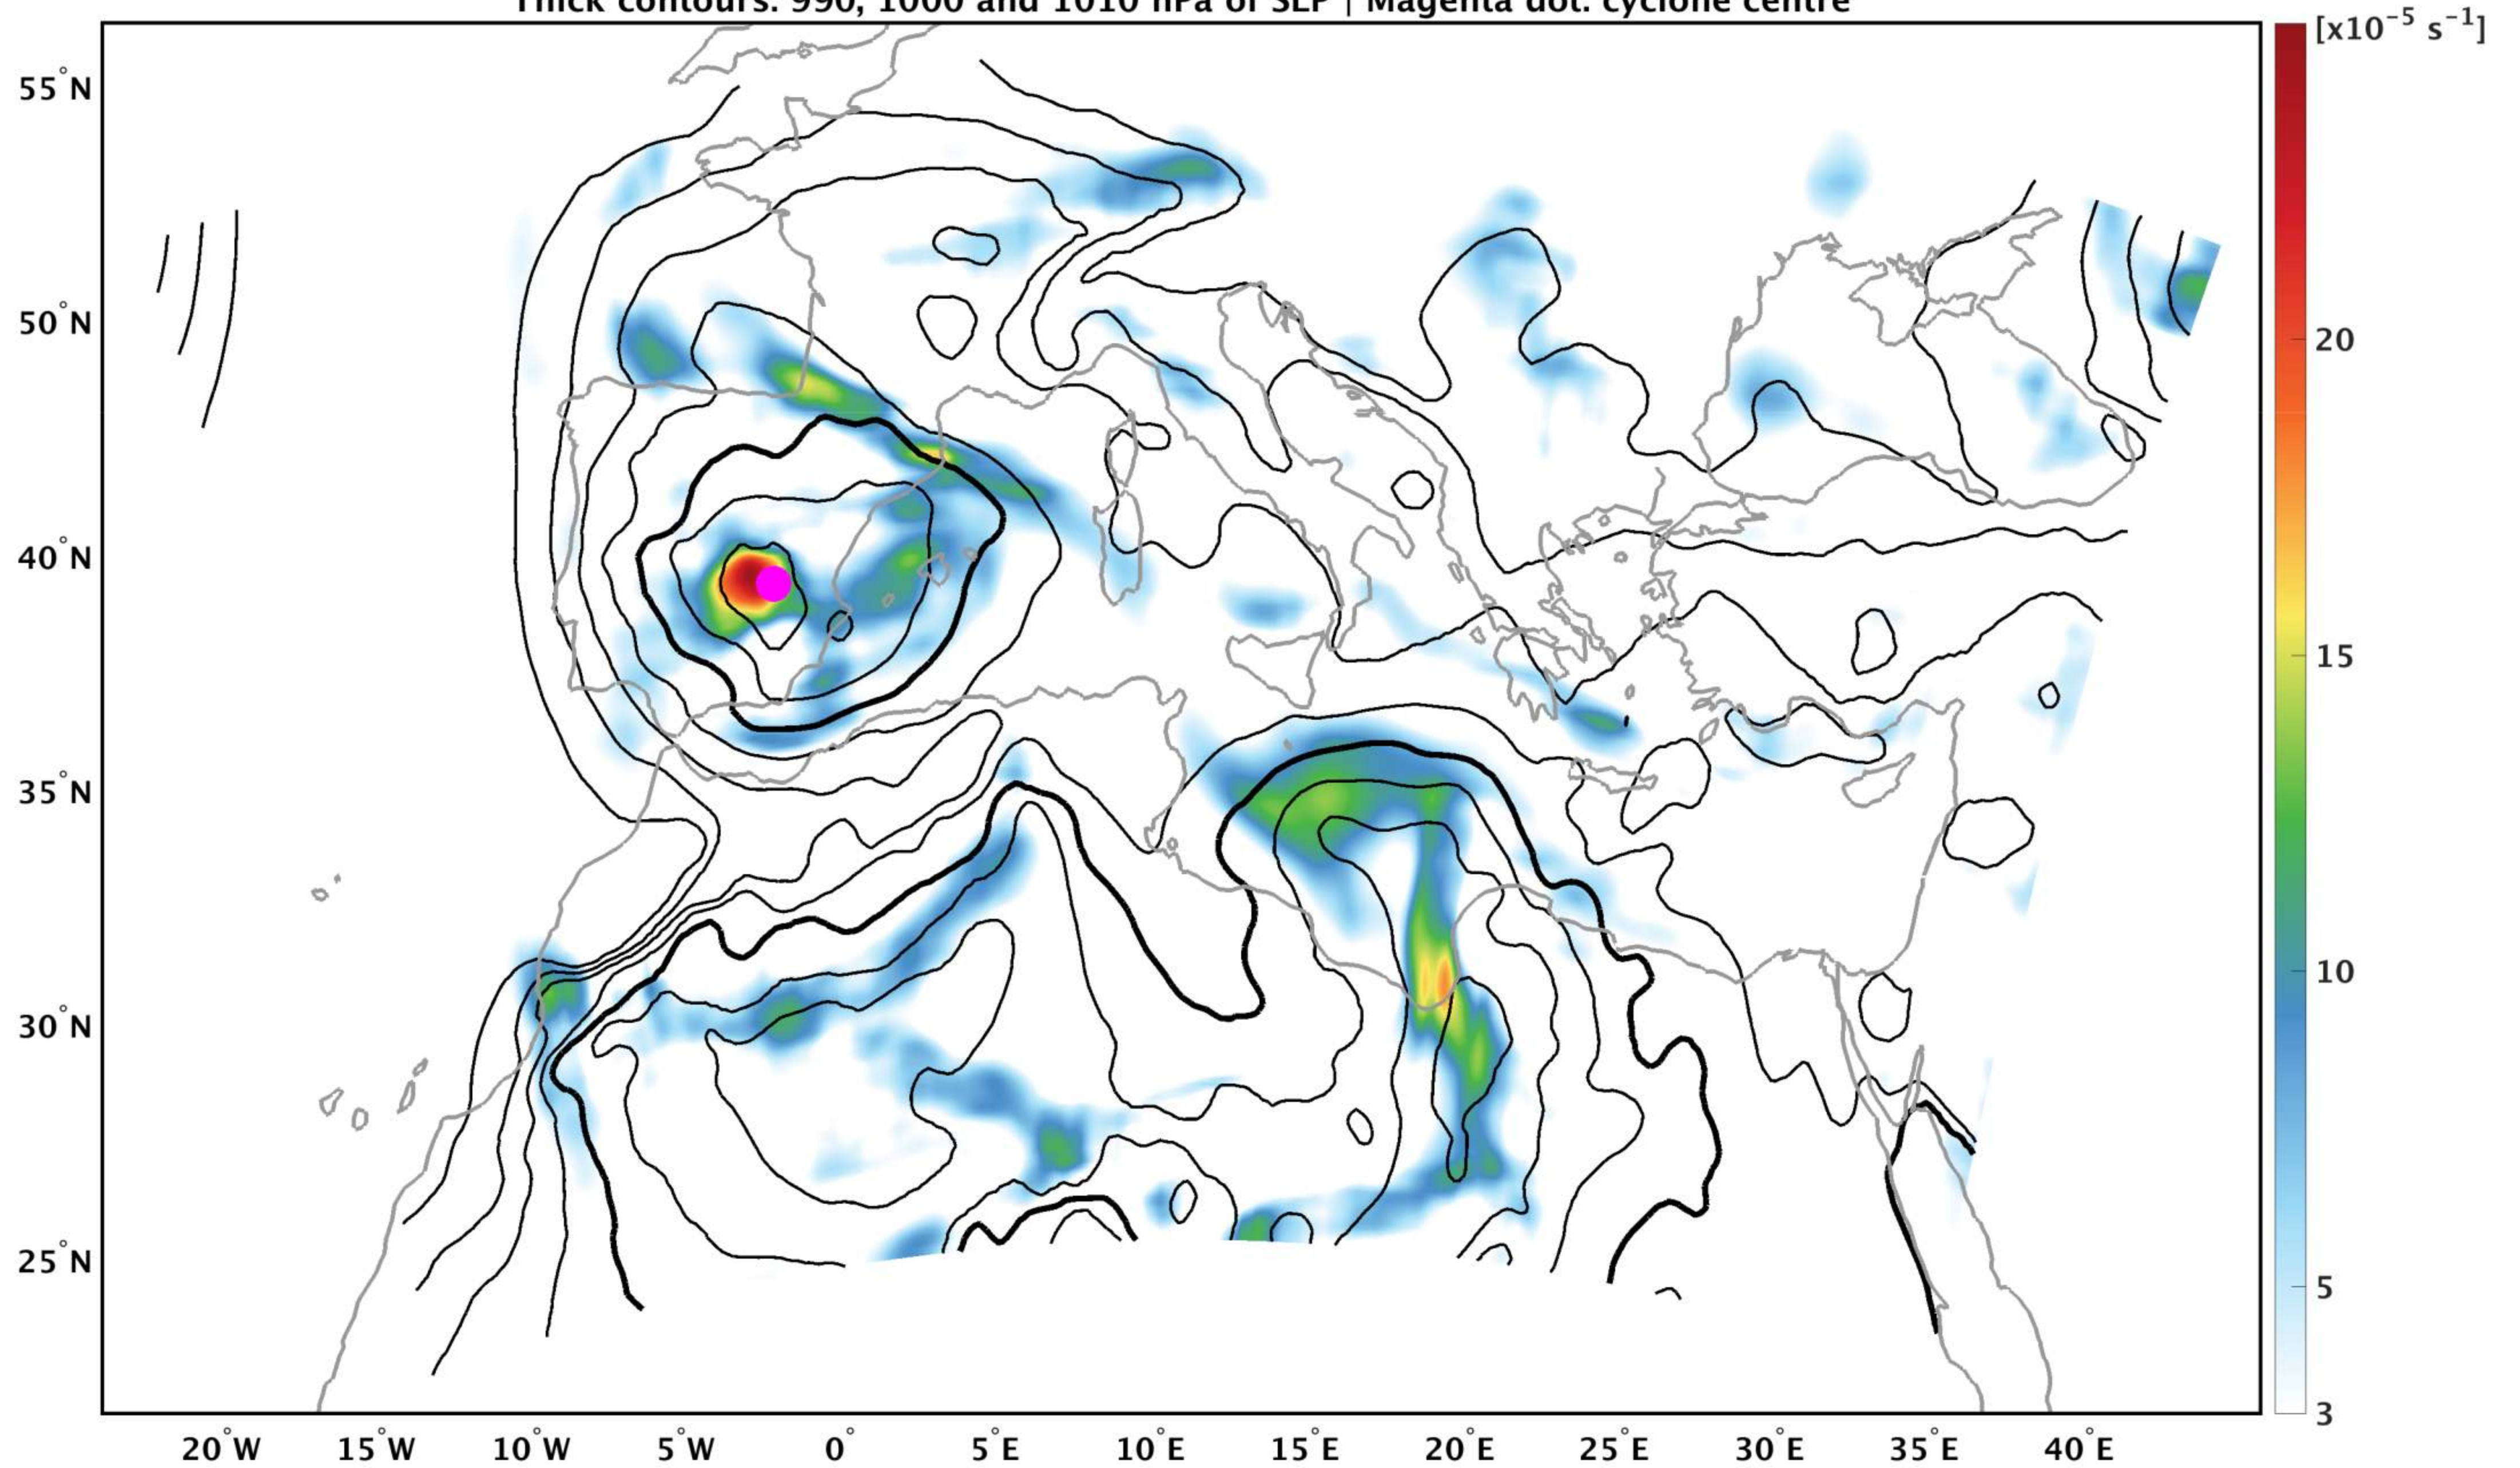



Case-28; Date: 18/11/2013

Colour: Relative vorticity ( $\times 10^{-5}$ ) | Contour: SLP (from 1018 hPa with an interval of 2 hPa)

Thick contours: 990, 1000 and 1010 hPa of SLP | Magenta dot: cyclone centre

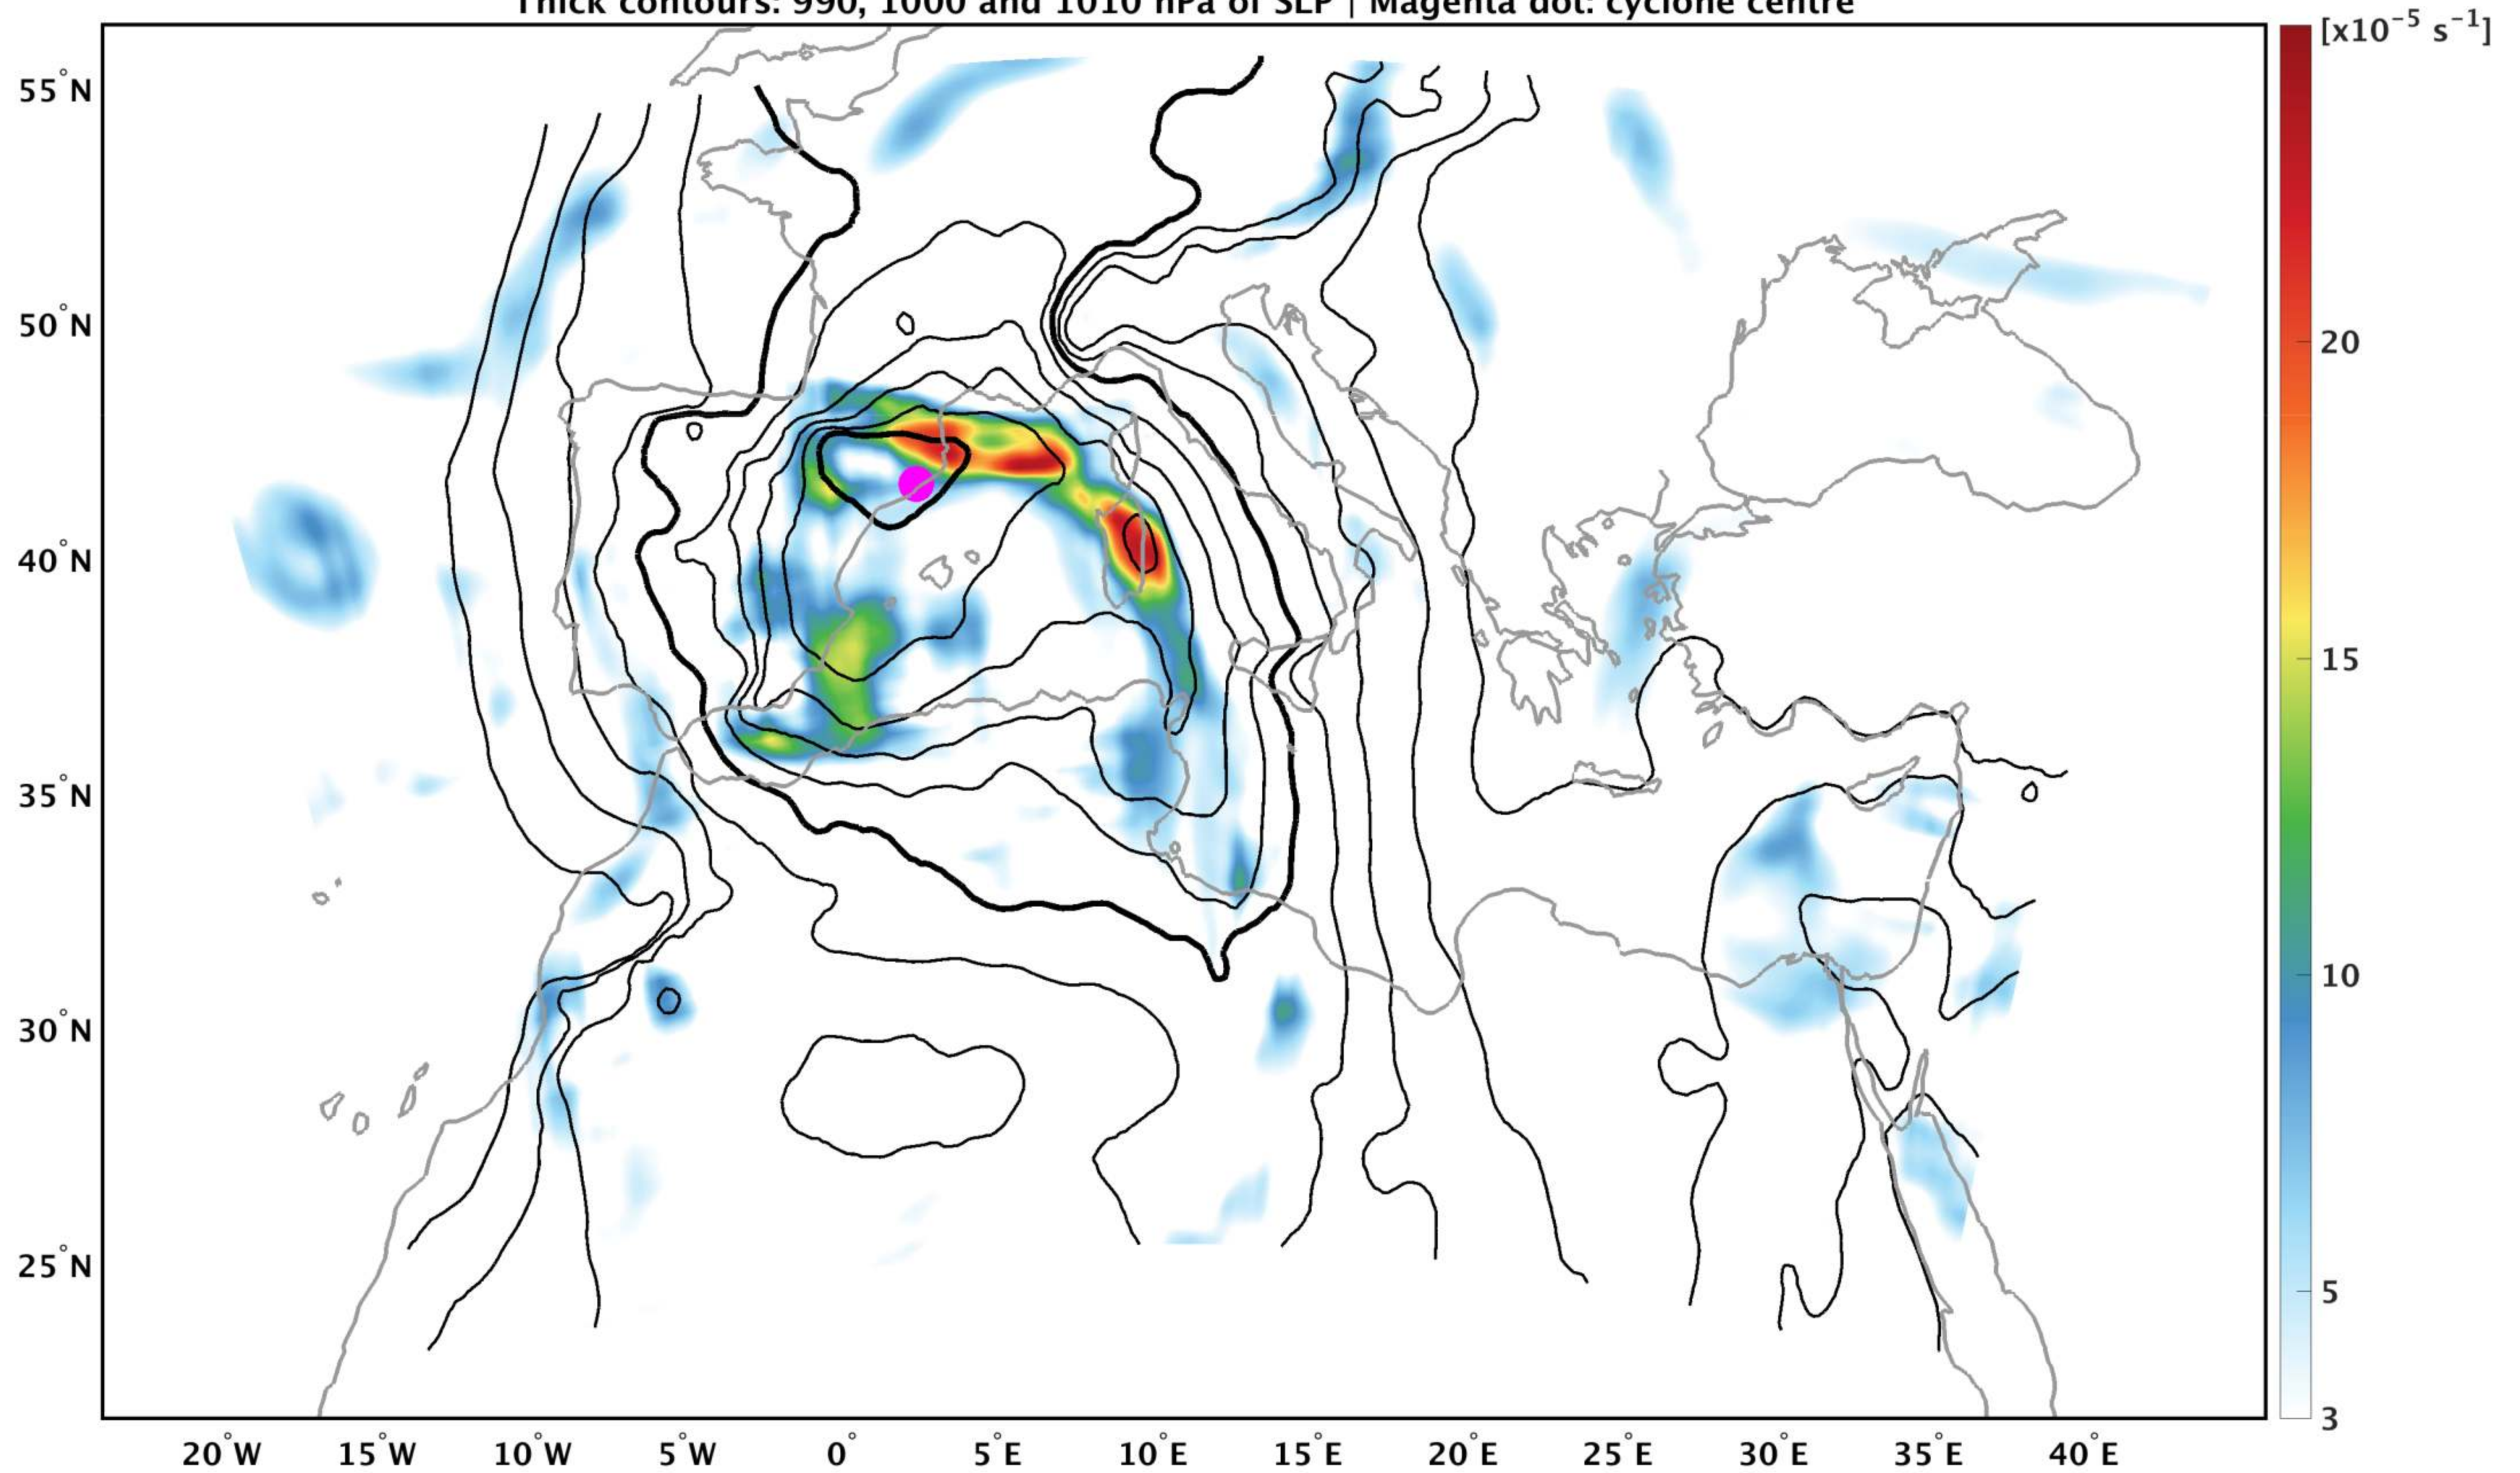



Case-29; Date: 28/2/2013

Colour: Relative vorticity ( $\times 10^{-5}$ ) | Contour: SLP (from 1018 hPa with an interval of 2 hPa)

Thick contours: 990, 1000 and 1010 hPa of SLP | Magenta dot: cyclone centre

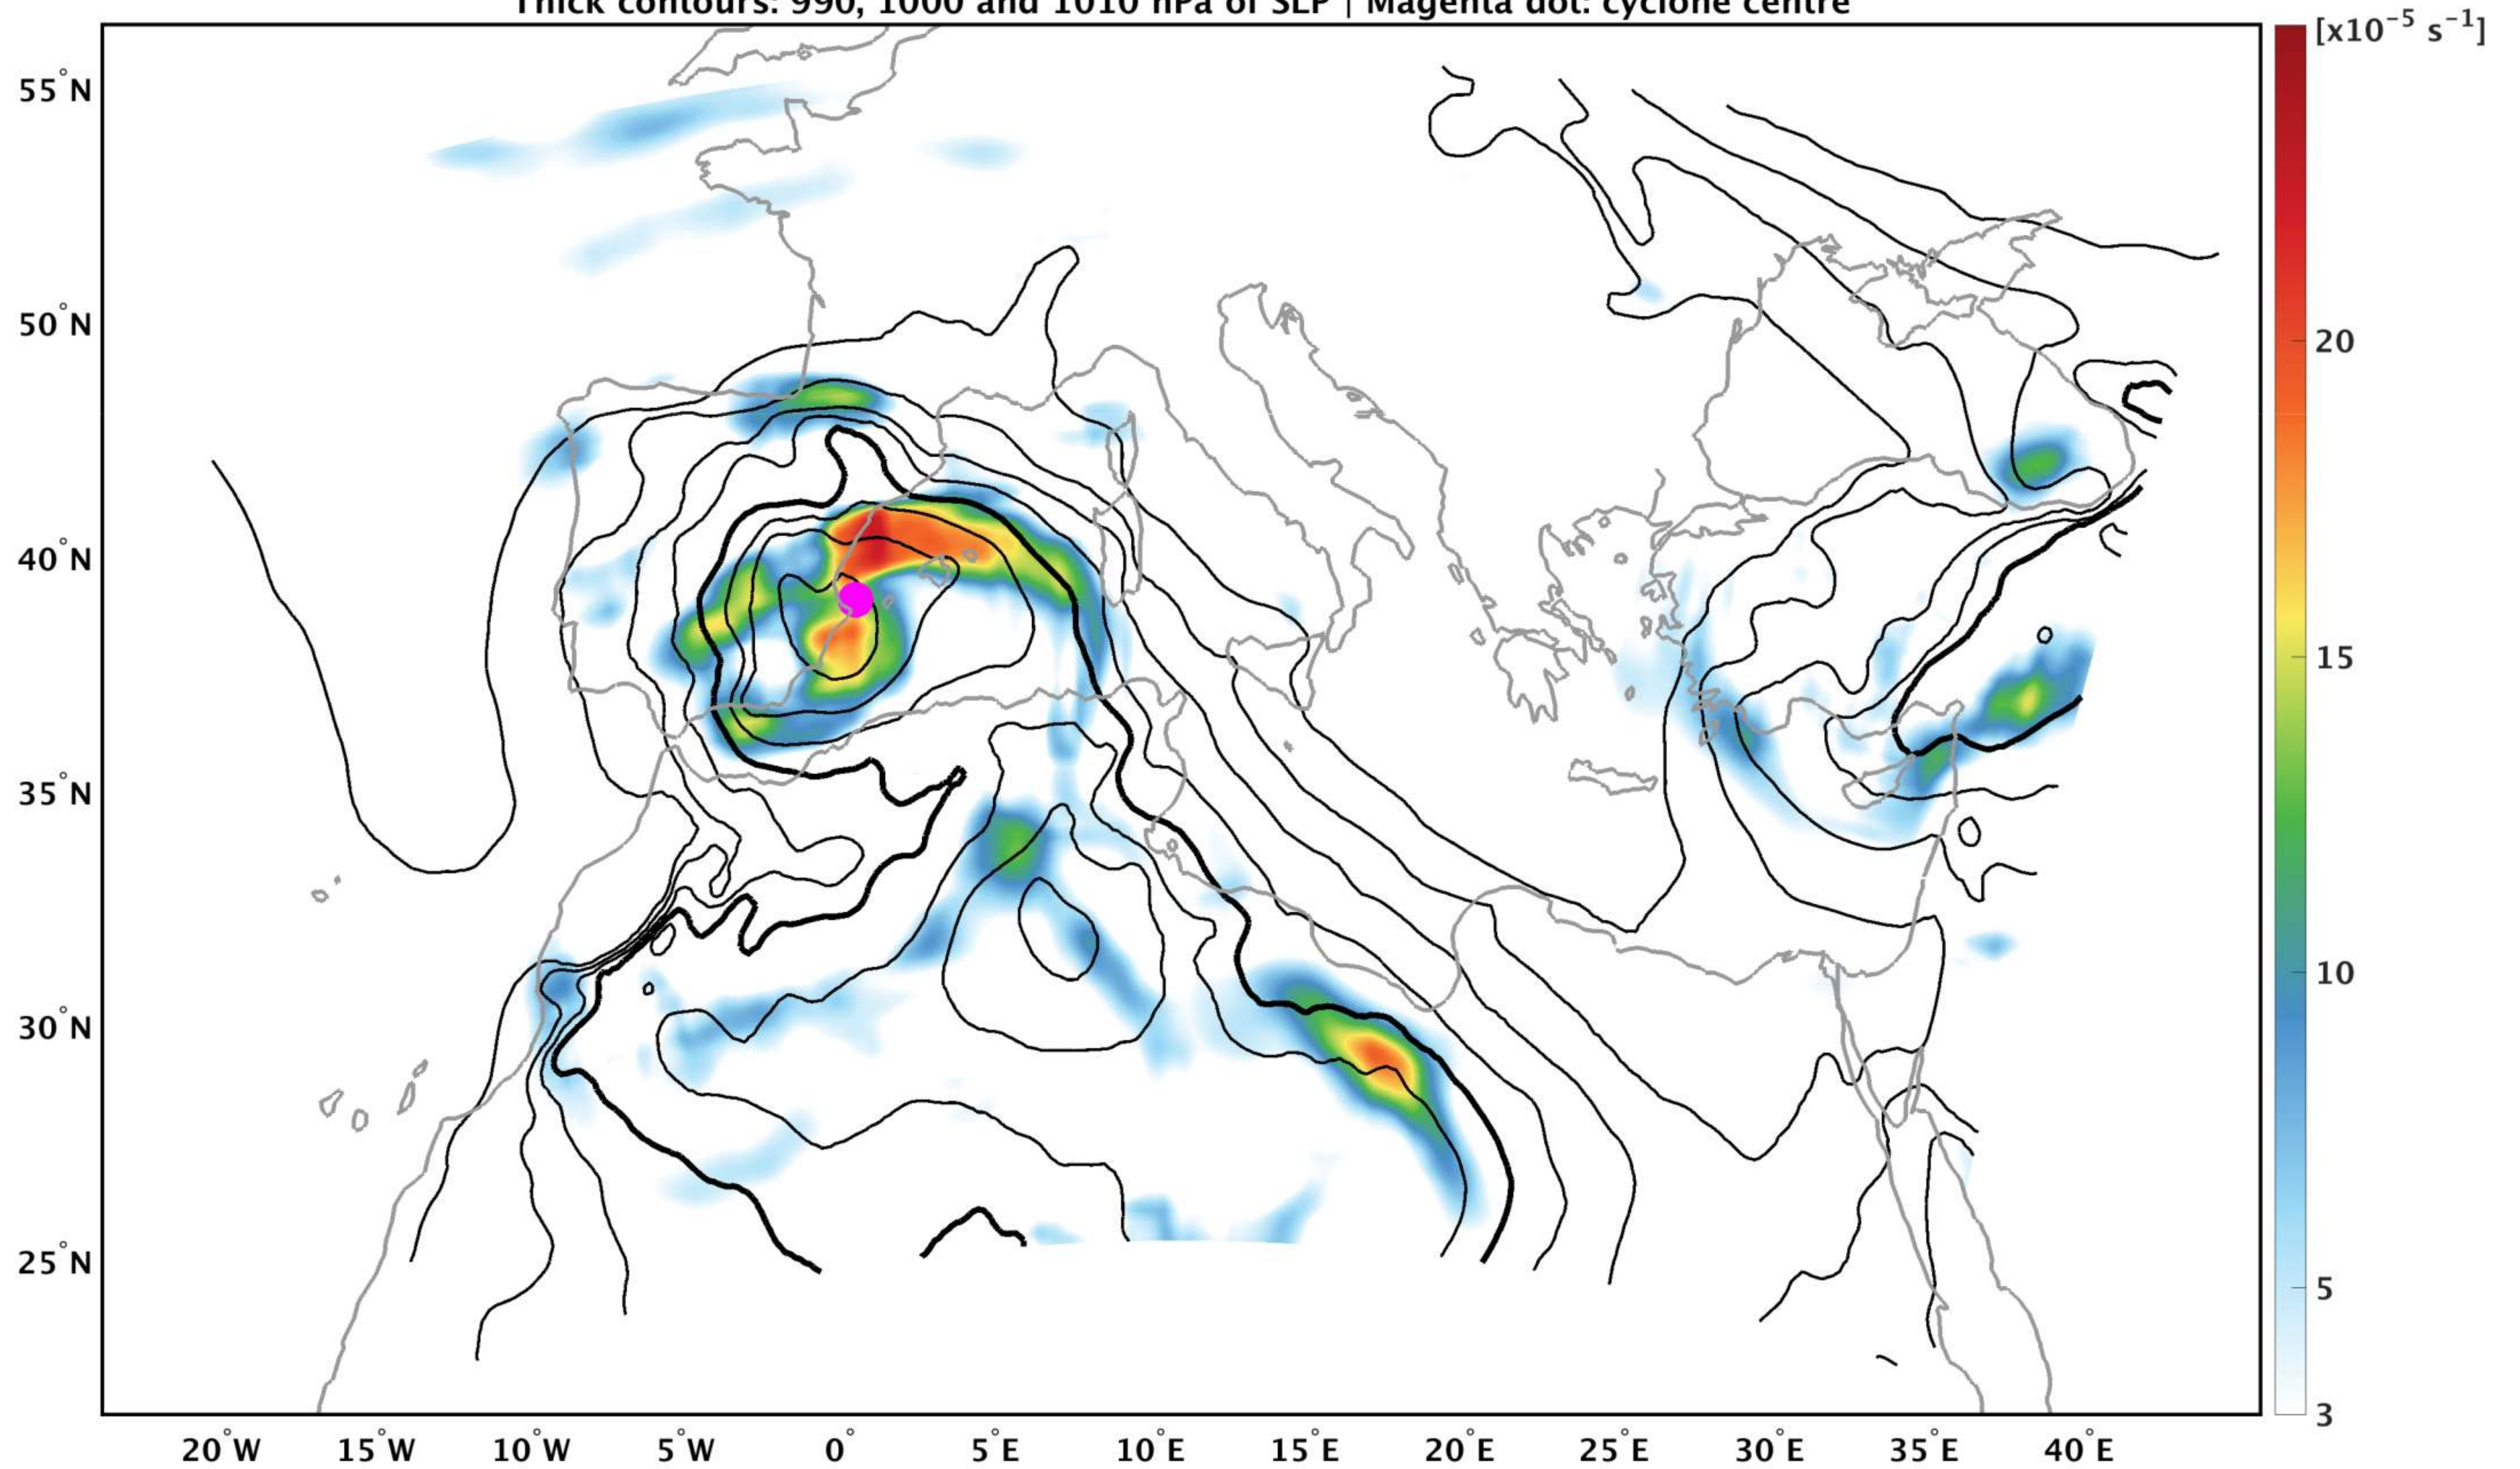



Case-30; Date: 19/10/2010

Colour: Relative vorticity ( $\times 10^{-5}$ ) | Contour: SLP (from 1018 hPa with an interval of 2 hPa)

Thick contours: 990, 1000 and 1010 hPa of SLP | Magenta dot: cyclone centre

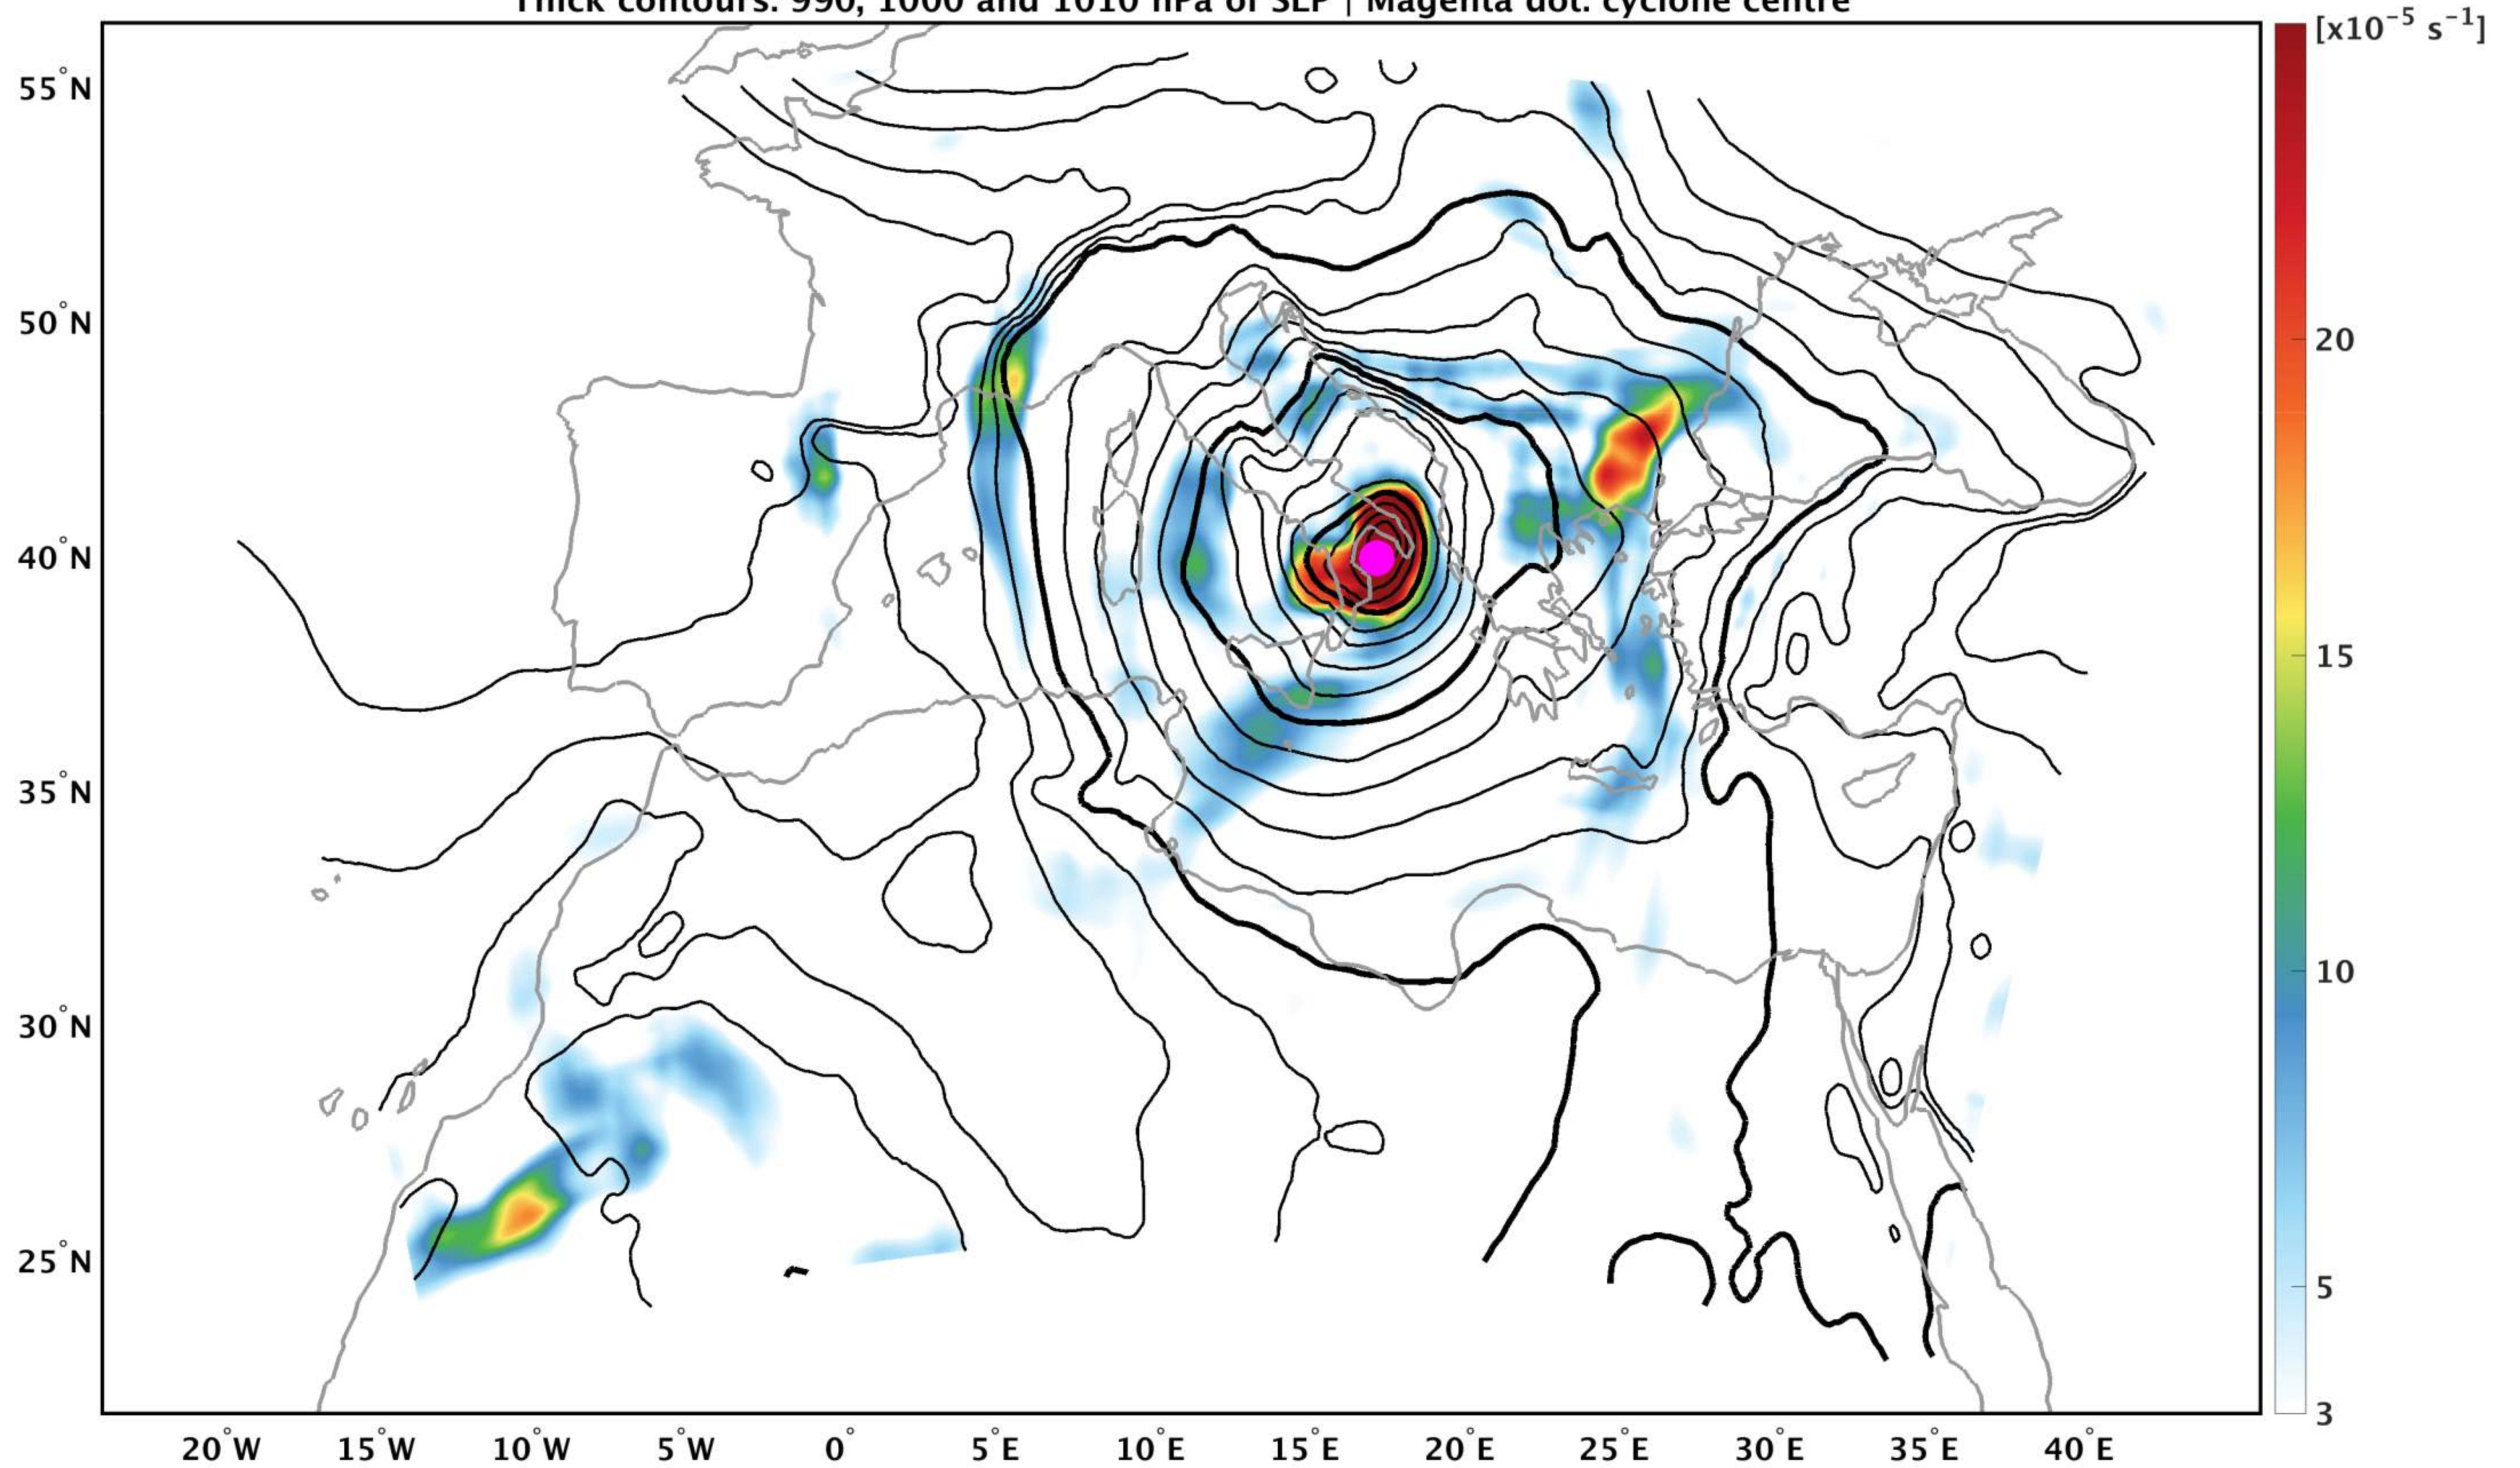



Case-31; Date: 27/3/2014

Colour: Relative vorticity ( $\times 10^{-5}$ ) | Contour: SLP (from 1018 hPa with an interval of 2 hPa)

Thick contours: 990, 1000 and 1010 hPa of SLP | Magenta dot: cyclone centre

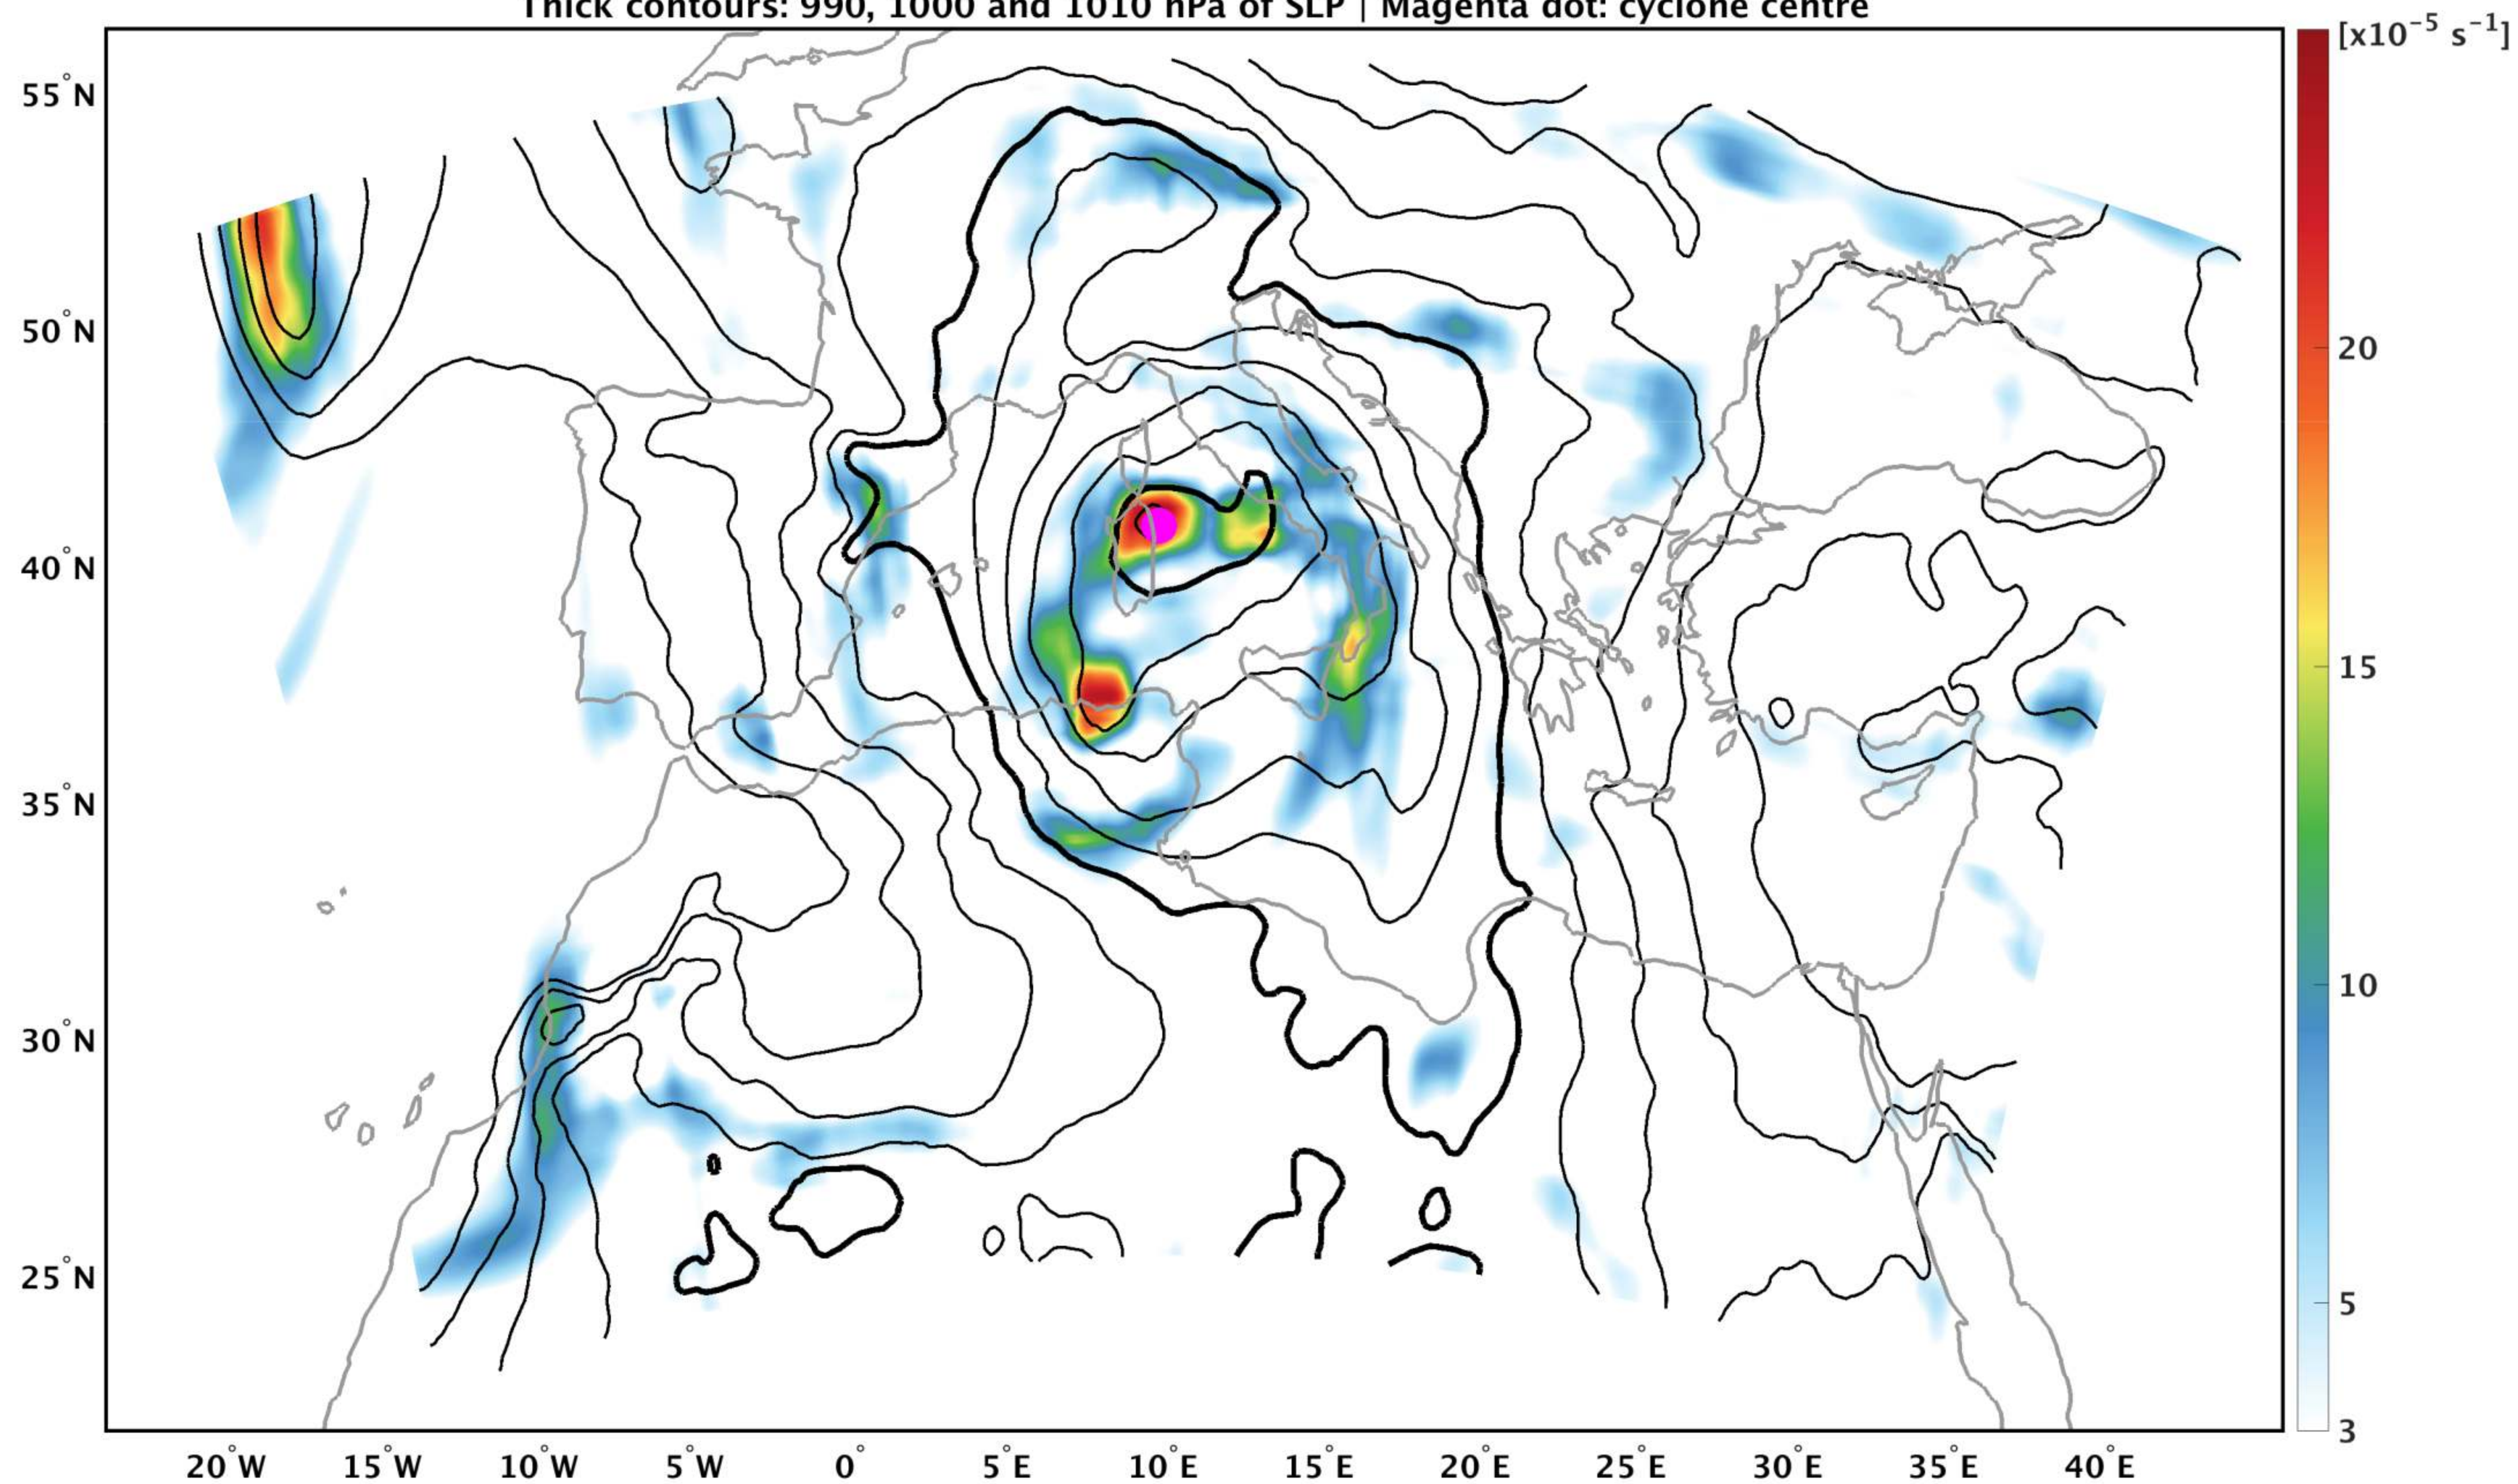



Case-32; Date: 6/11/2017

Colour: Relative vorticity ( $\times 10^{-5}$ ) | Contour: SLP (from 1018 hPa with an interval of 2 hPa)

Thick contours: 990, 1000 and 1010 hPa of SLP | Magenta dot: cyclone centre

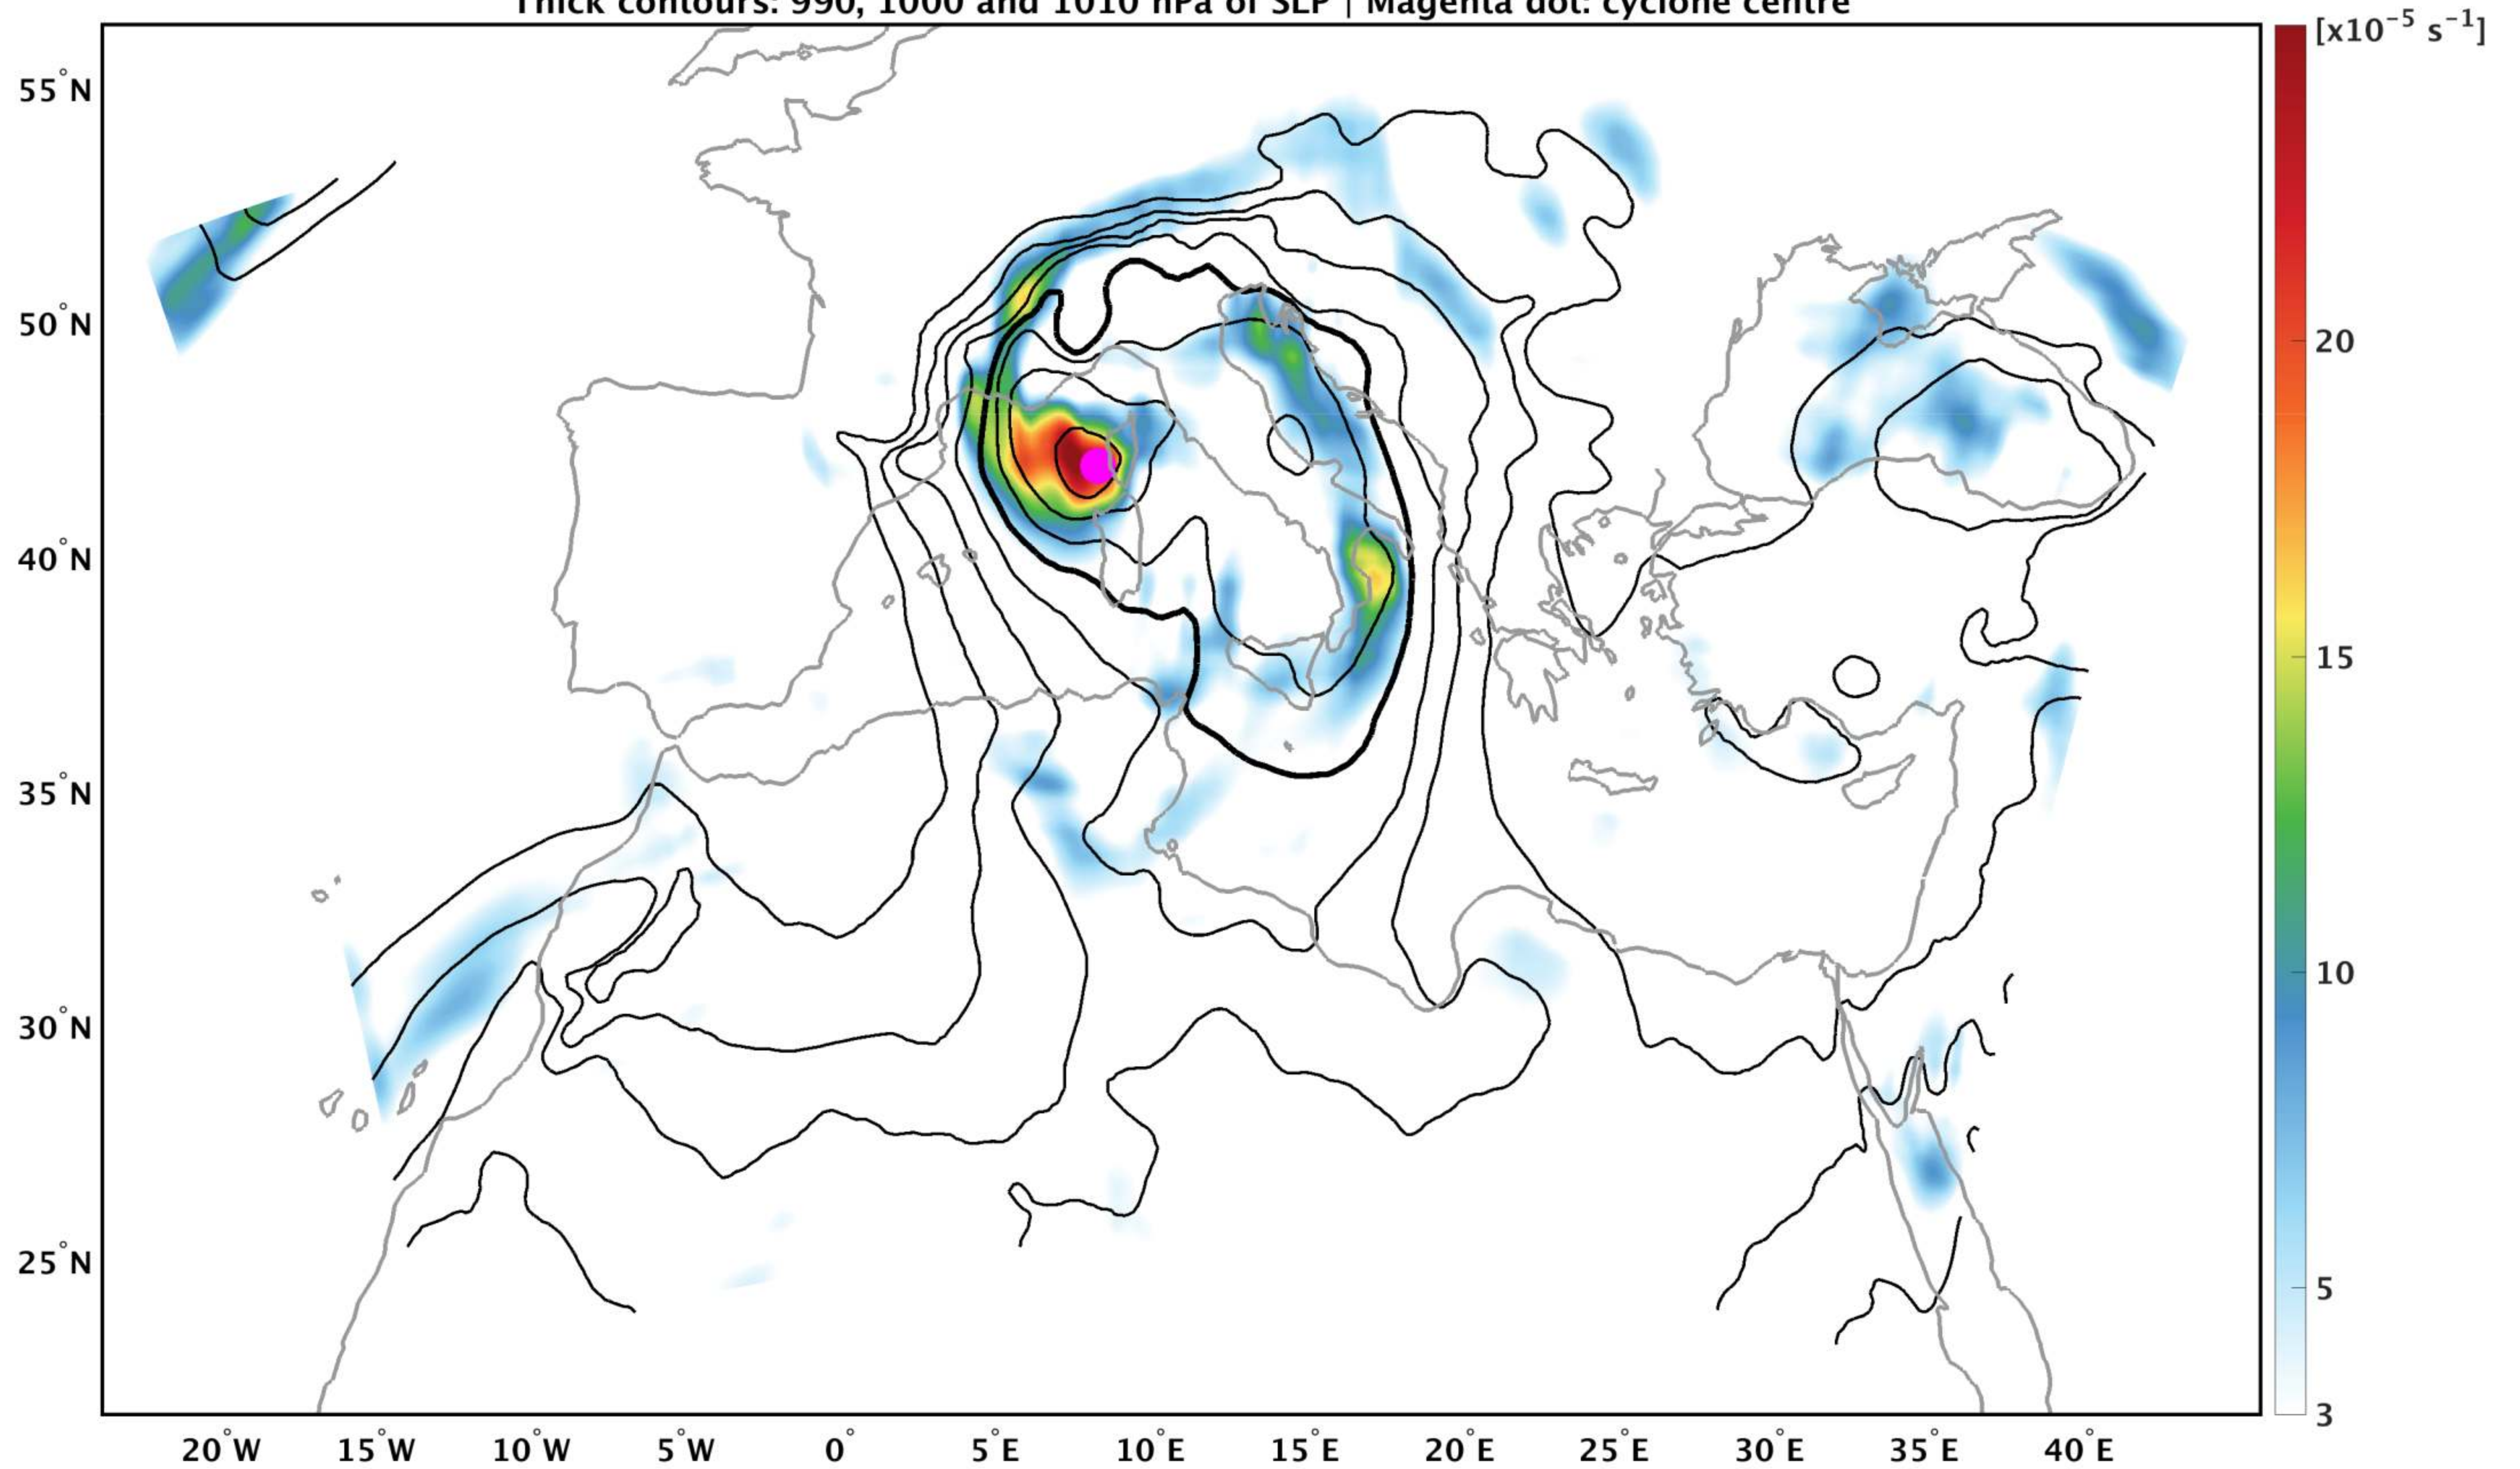



Case-33; Date: 17/3/2017

Colour: Relative vorticity ( $\times 10^{-5}$ ) | Contour: SLP (from 1018 hPa with an interval of 2 hPa)

Thick contours: 990, 1000 and 1010 hPa of SLP | Magenta dot: cyclone centre

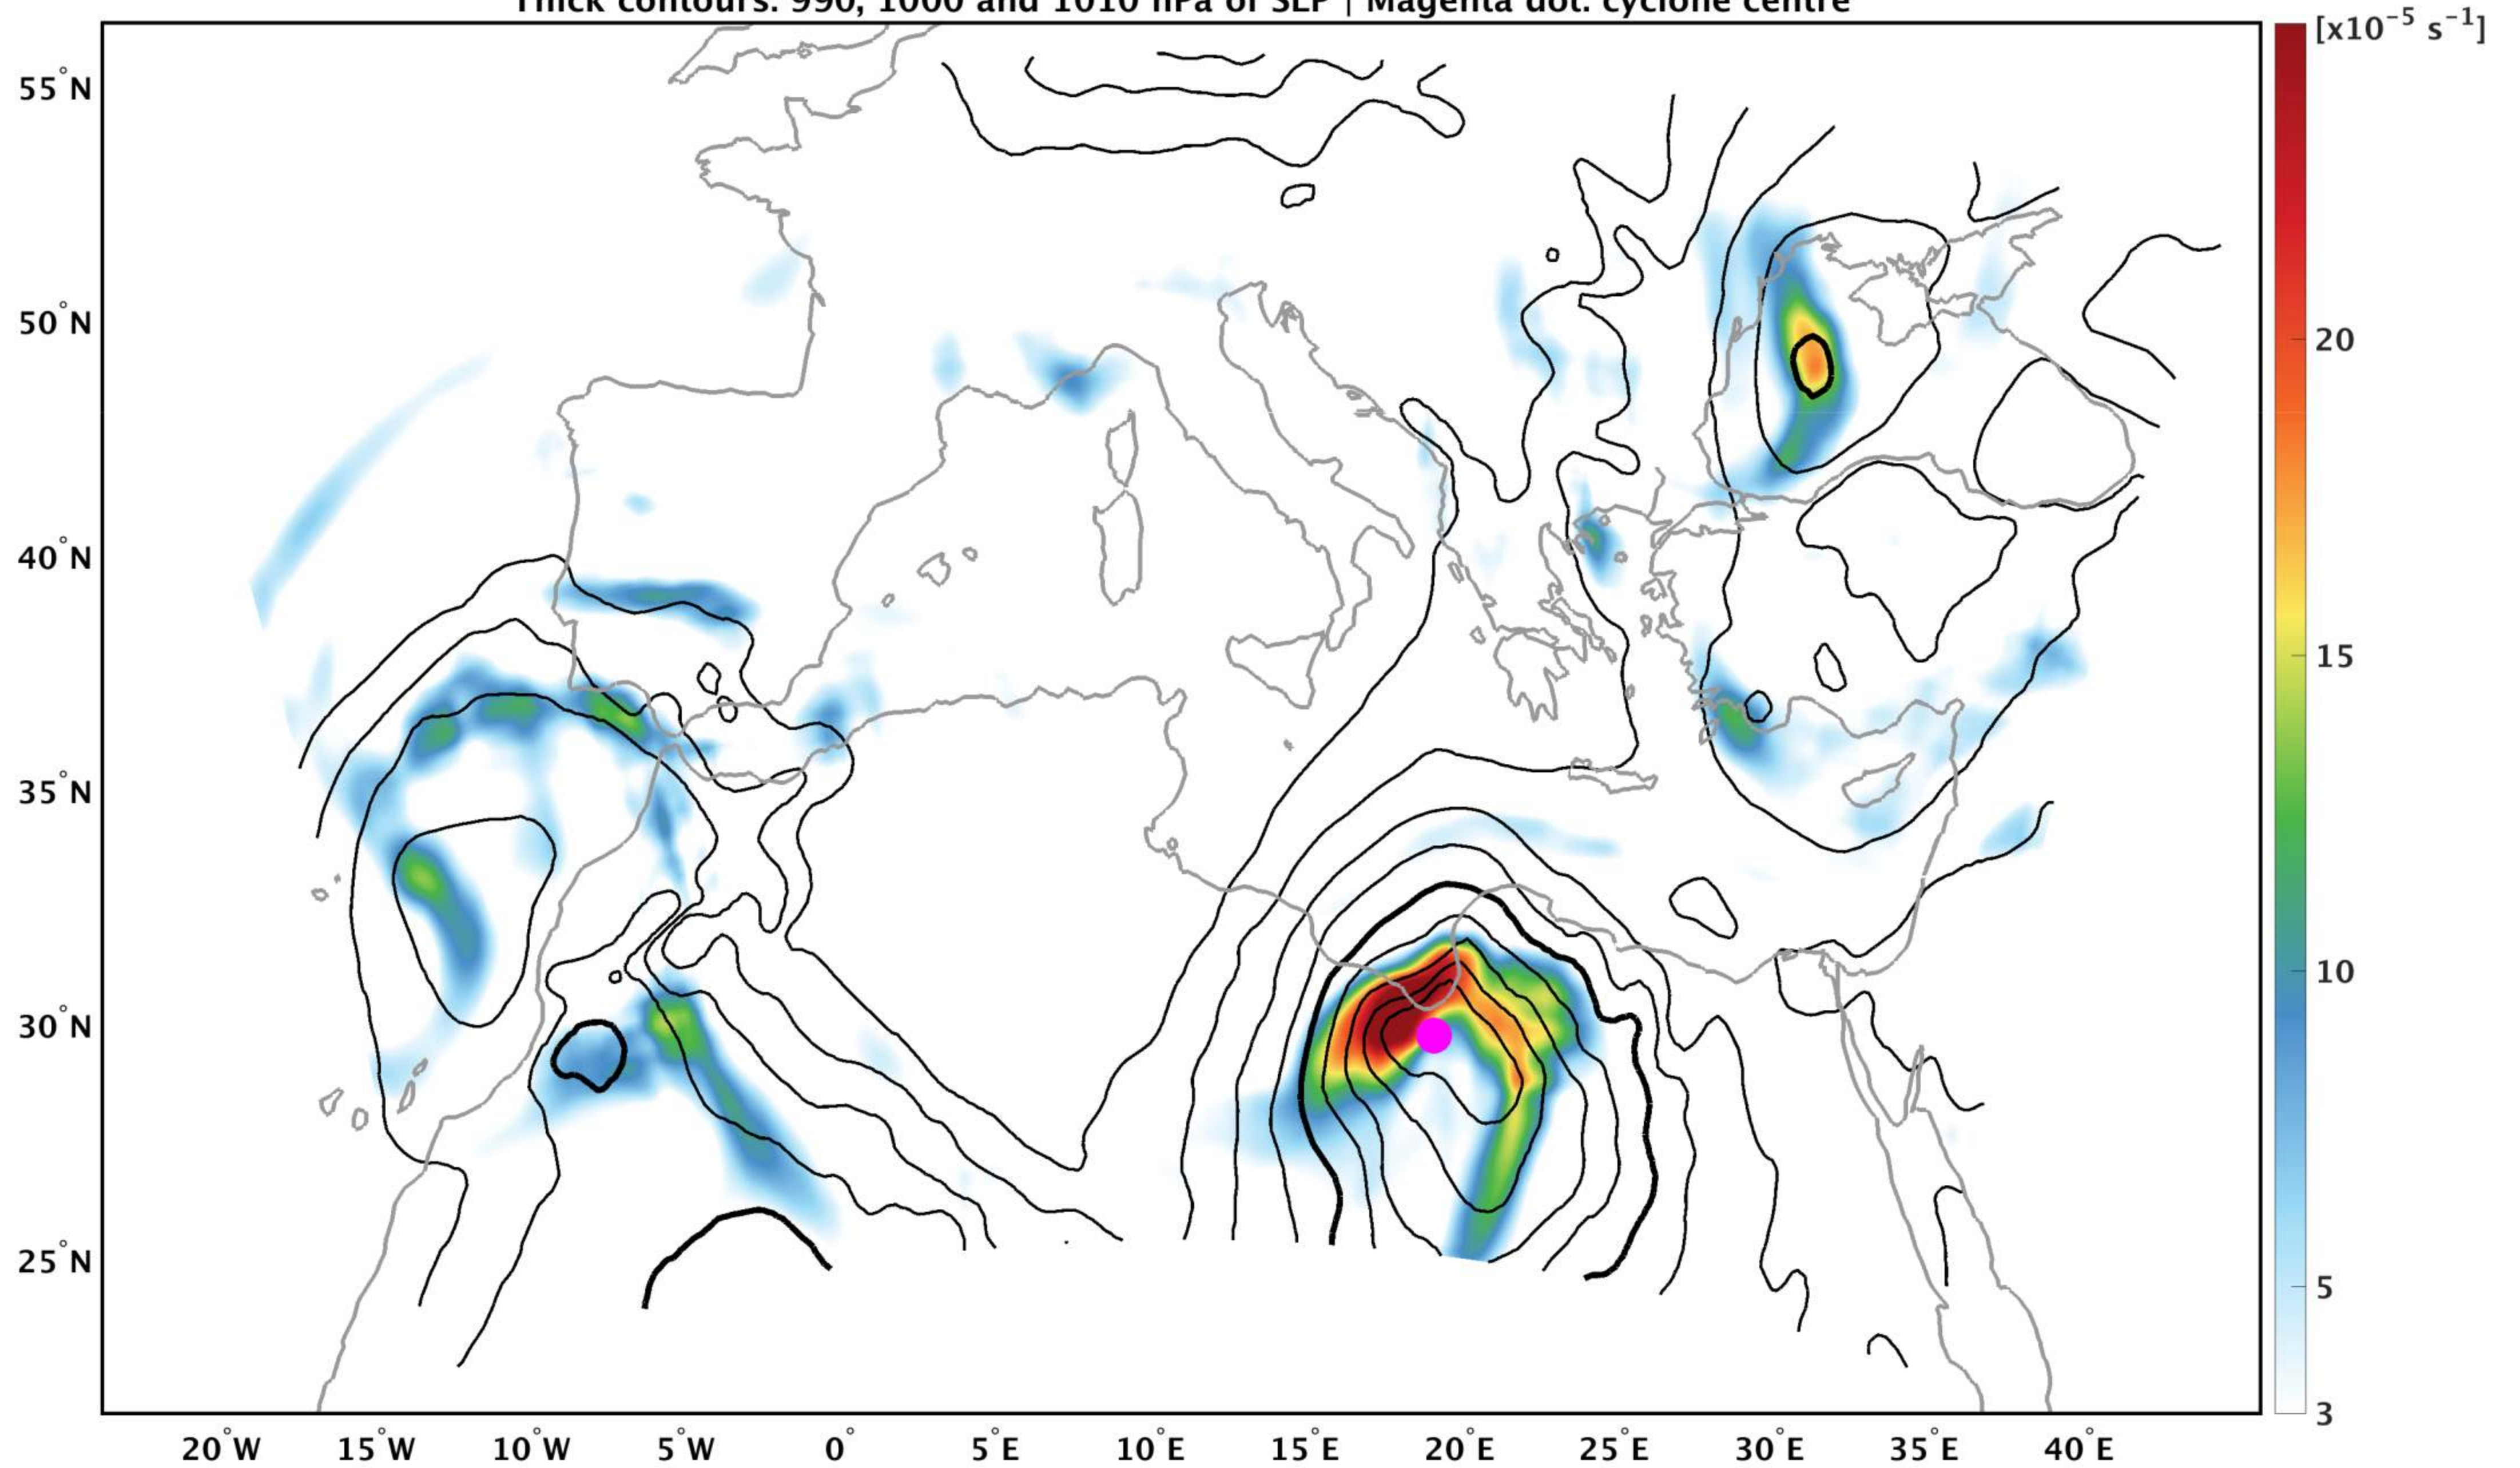



Case-34; Date: 15/5/2010

Colour: Relative vorticity ( $\times 10^{-5}$ ) | Contour: SLP (from 1018 hPa with an interval of 2 hPa)

Thick contours: 990, 1000 and 1010 hPa of SLP | Magenta dot: cyclone centre

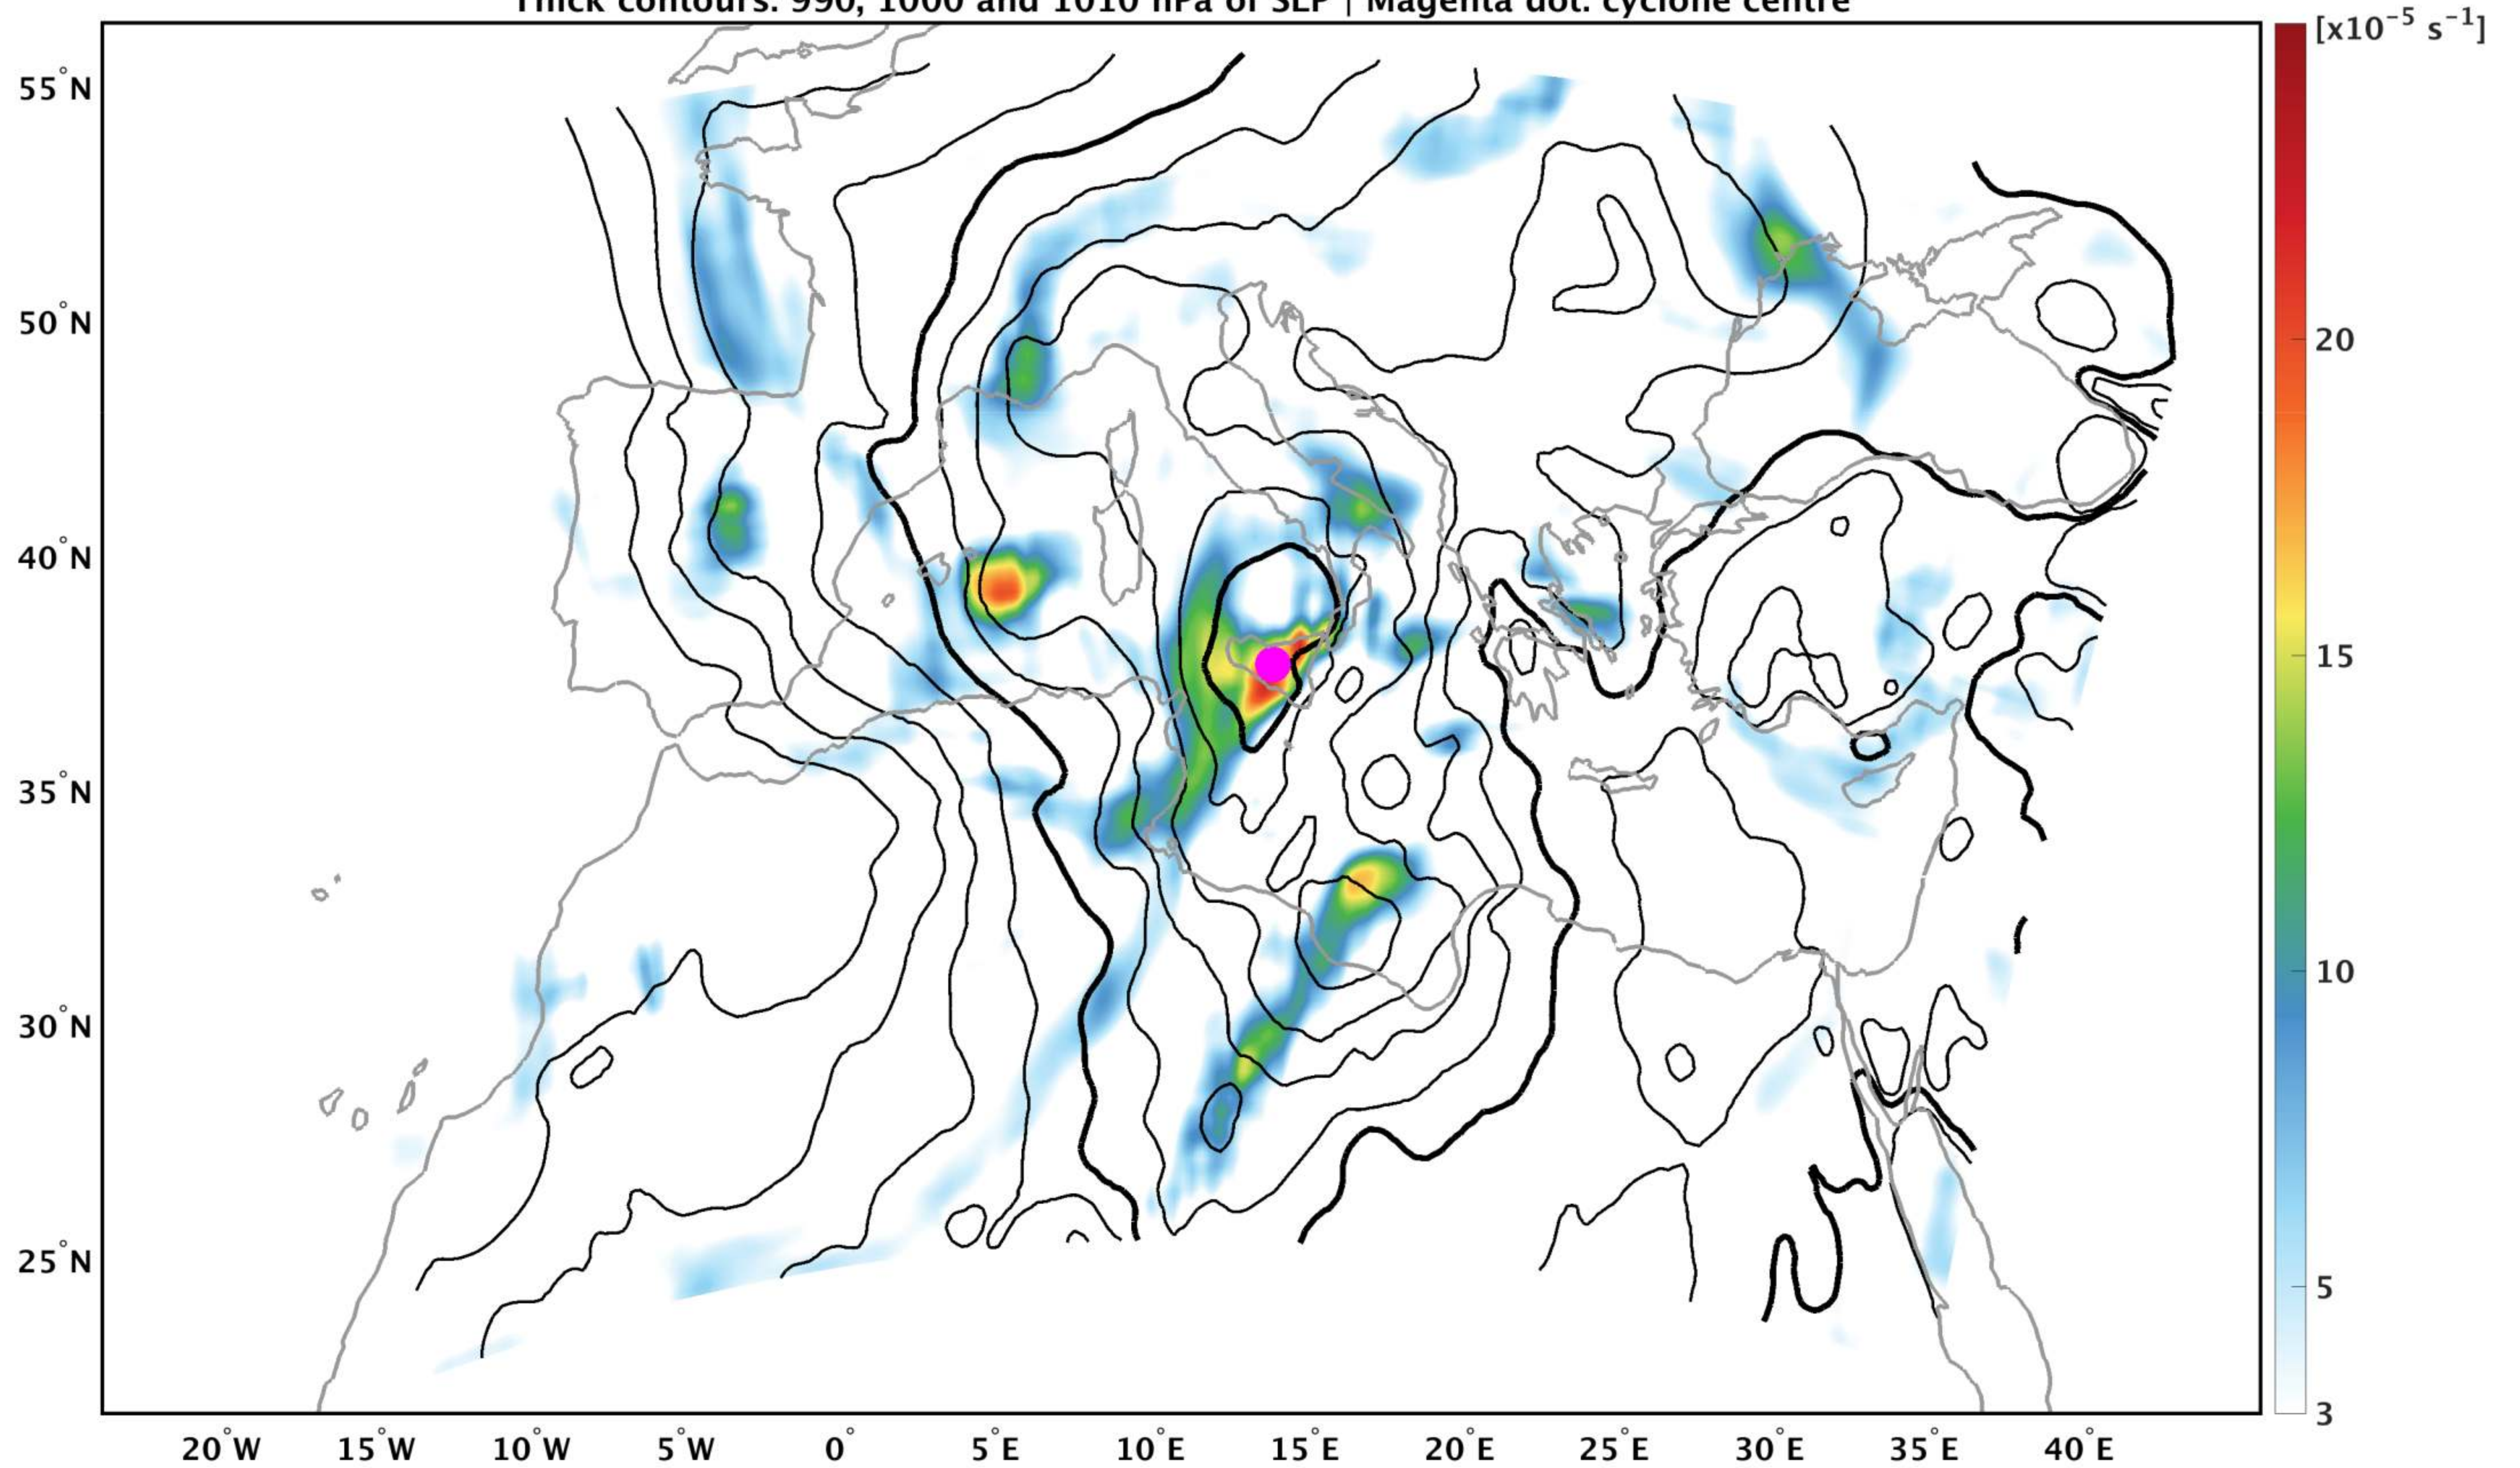



Case-35; Date: 8/3/2010

Colour: Relative vorticity ( $\times 10^{-5}$ ) | Contour: SLP (from 1018 hPa with an interval of 2 hPa)

Thick contours: 990, 1000 and 1010 hPa of SLP | Magenta dot: cyclone centre

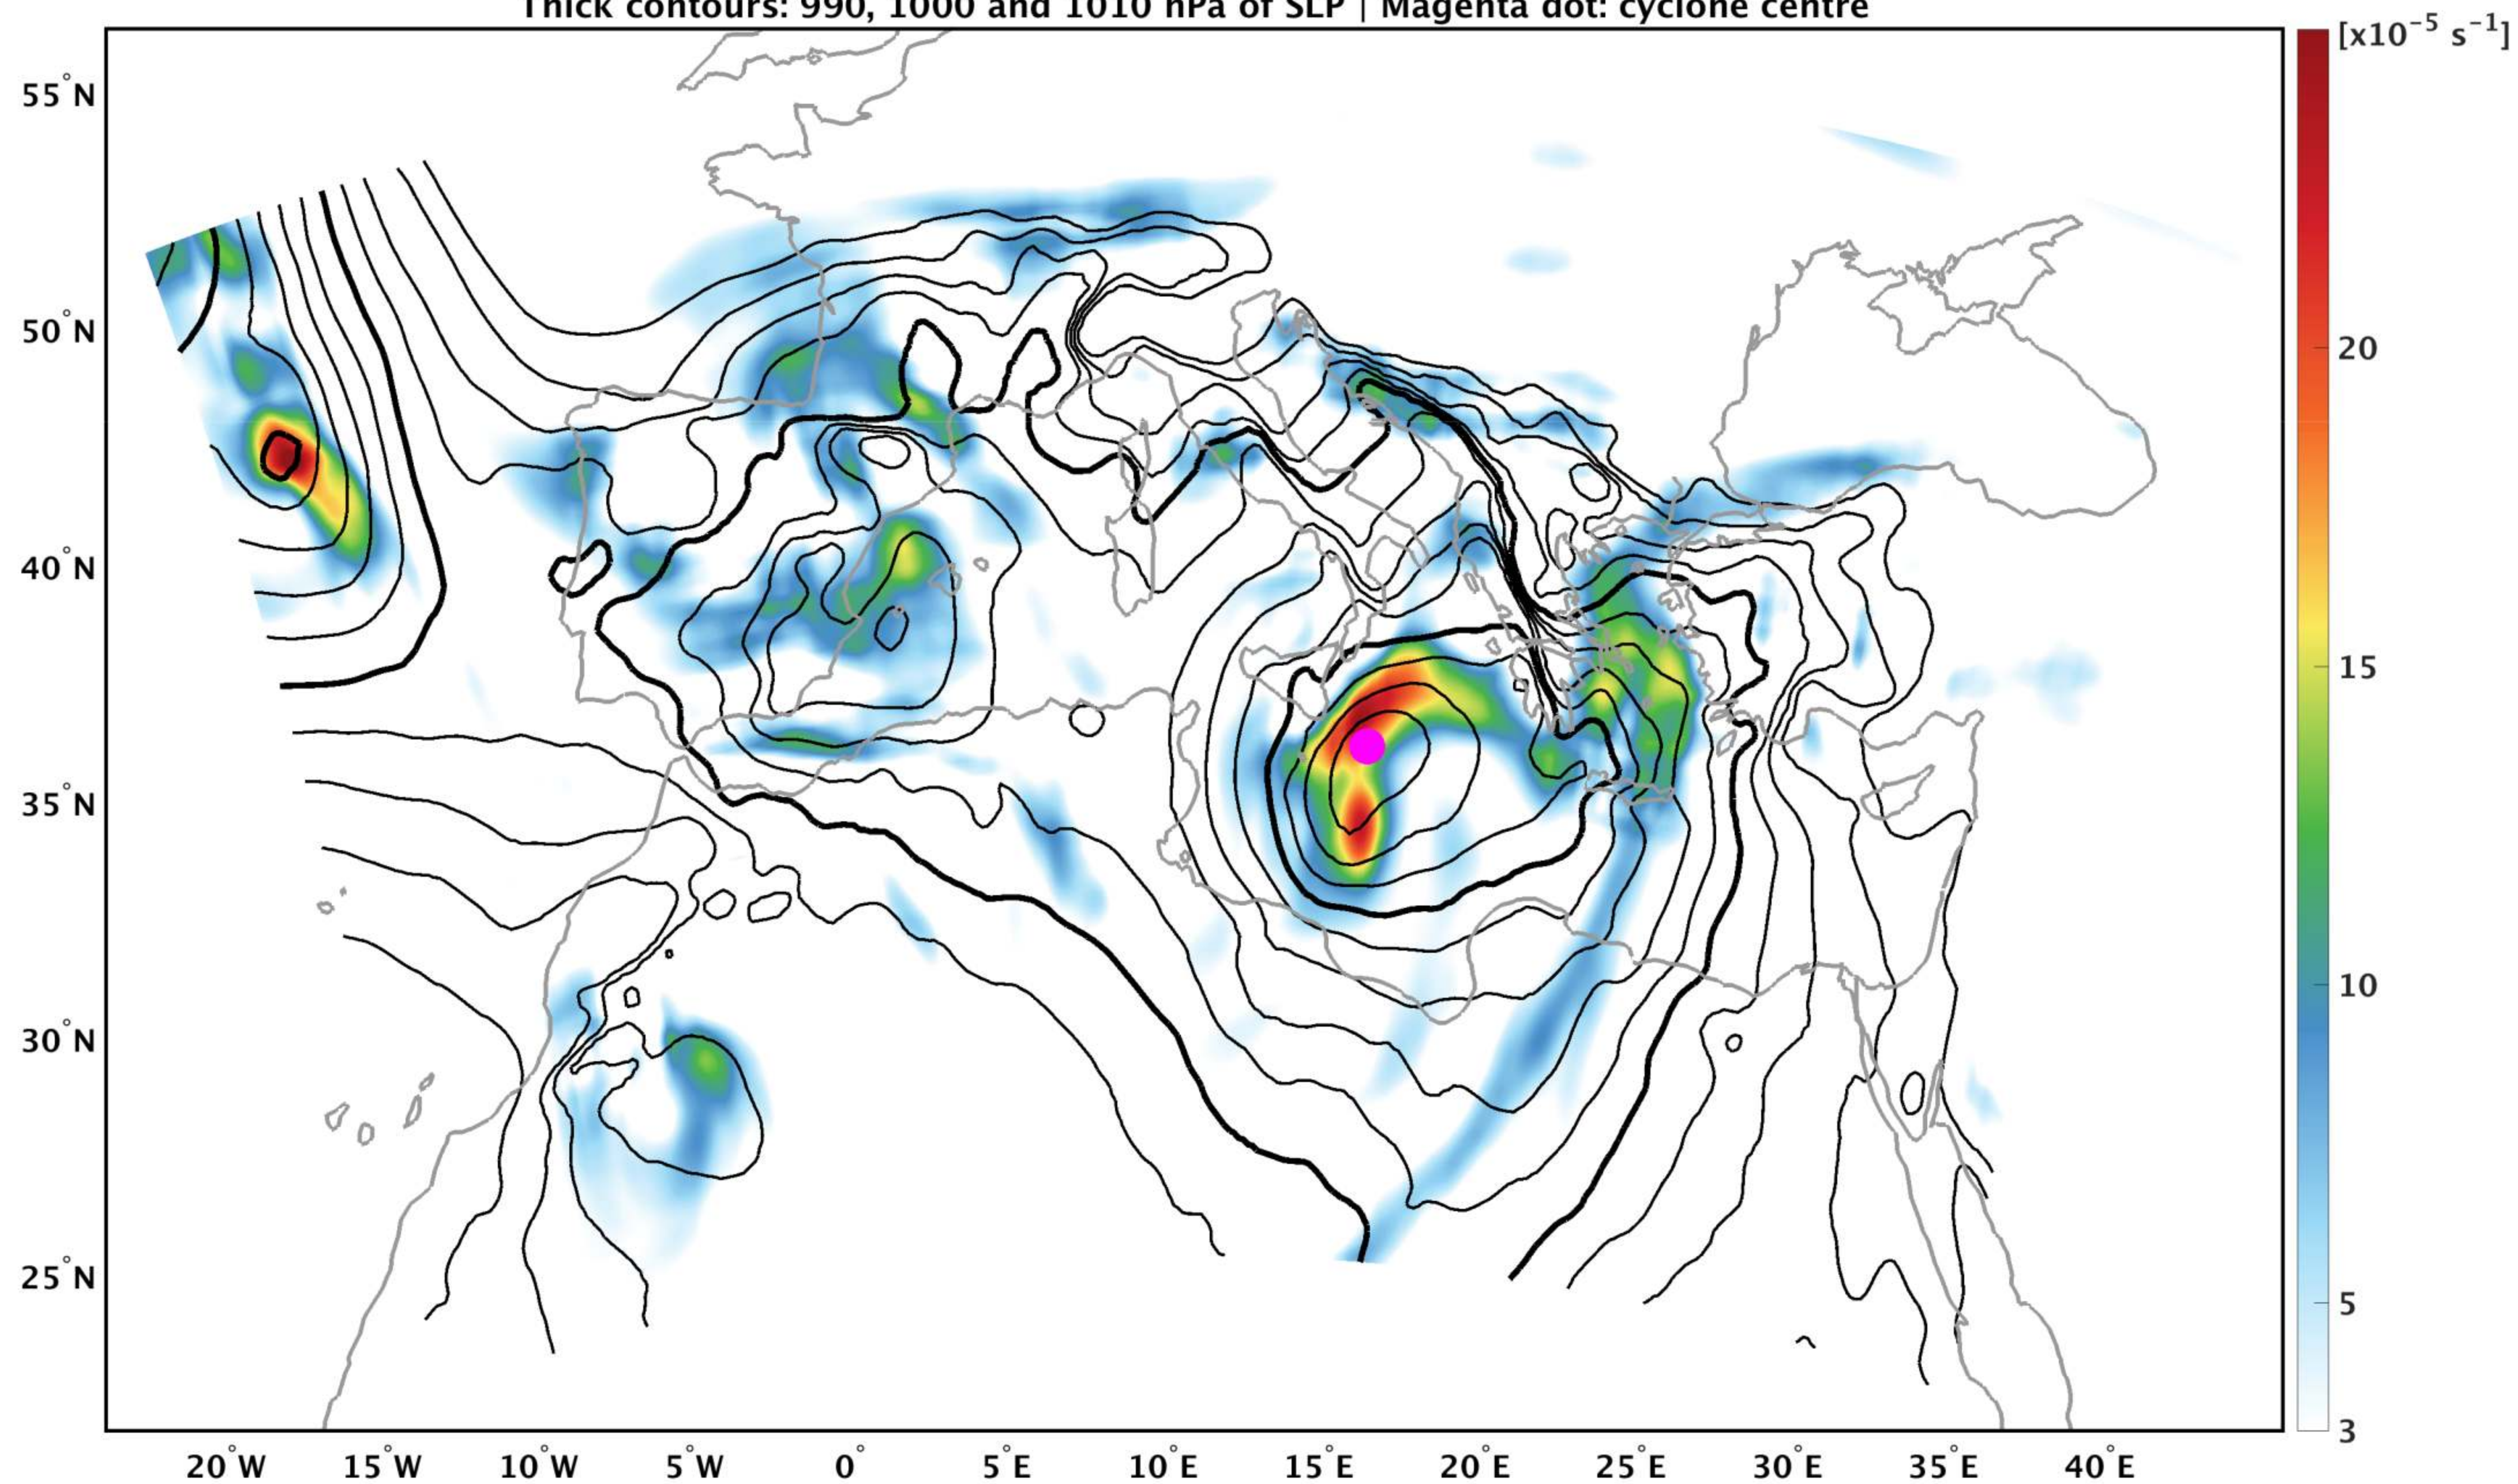



Case-36; Date: 14/1/2010

Colour: Relative vorticity ( $\times 10^{-5}$ ) | Contour: SLP (from 1018 hPa with an interval of 2 hPa)

Thick contours: 990, 1000 and 1010 hPa of SLP | Magenta dot: cyclone centre

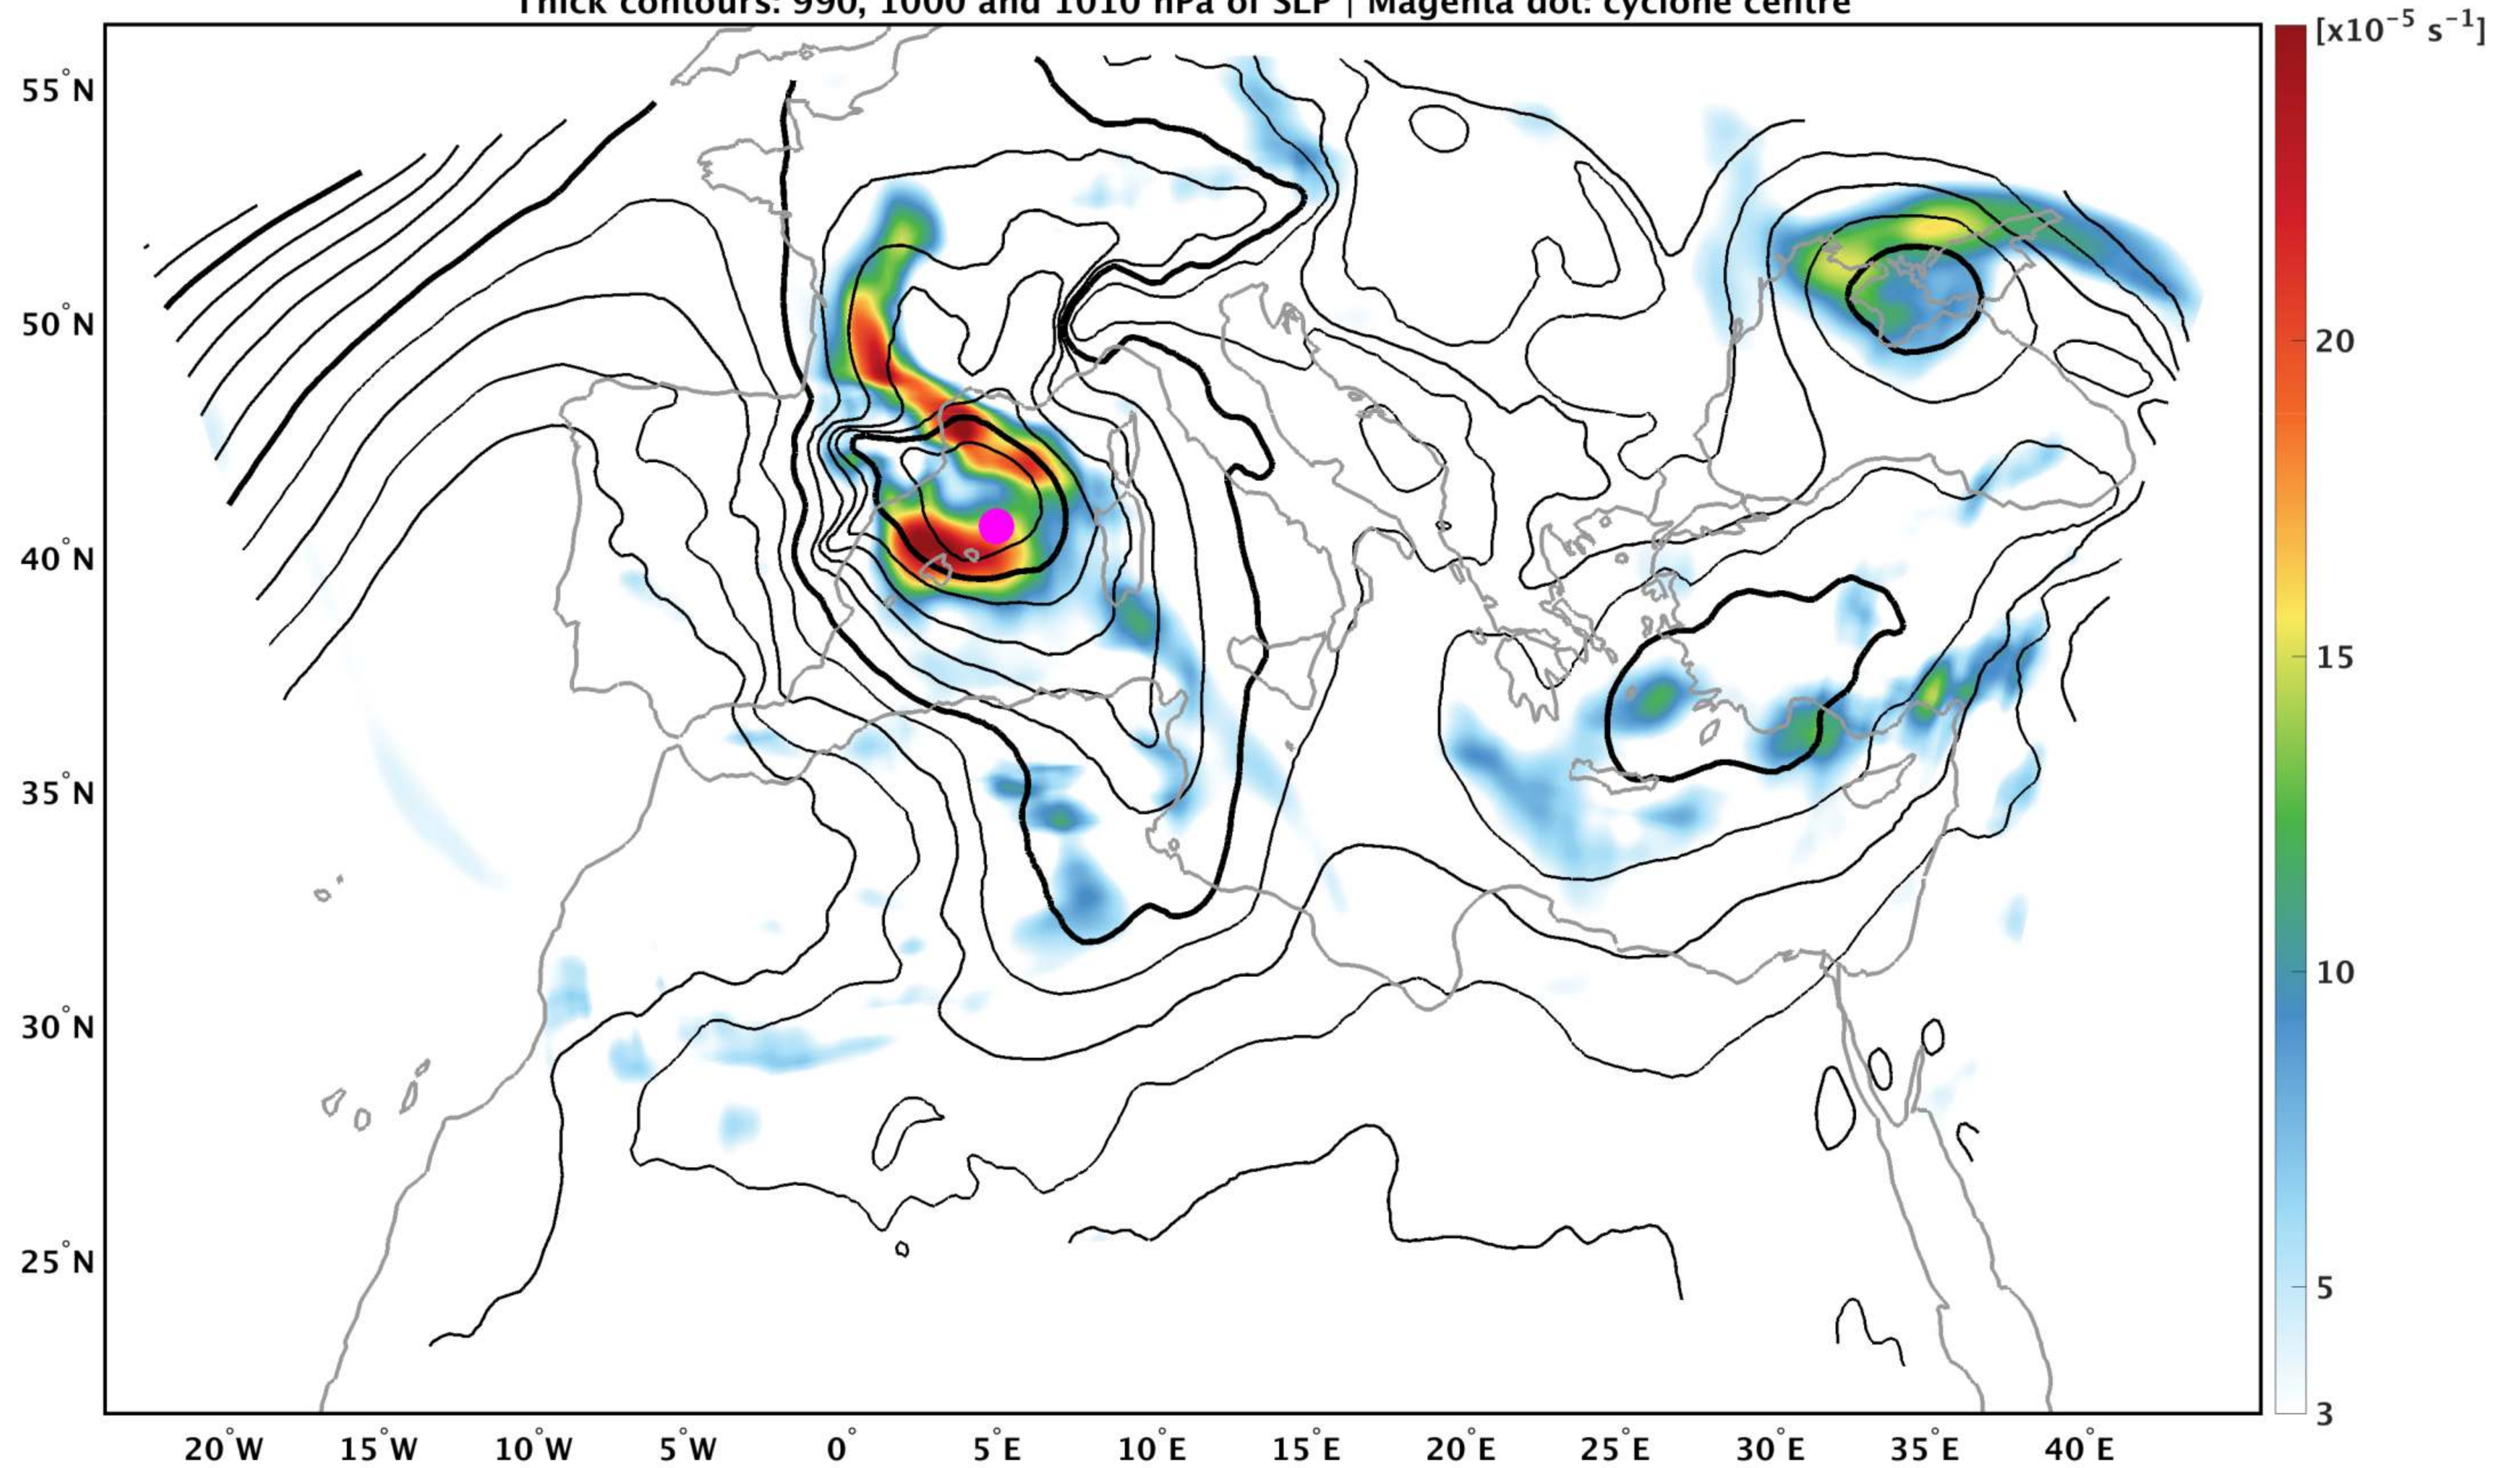



Case-37; Date: 15/5/2009

Colour: Relative vorticity ( $\times 10^{-5}$ ) | Contour: SLP (from 1018 hPa with an interval of 2 hPa)

Thick contours: 990, 1000 and 1010 hPa of SLP | Magenta dot: cyclone centre

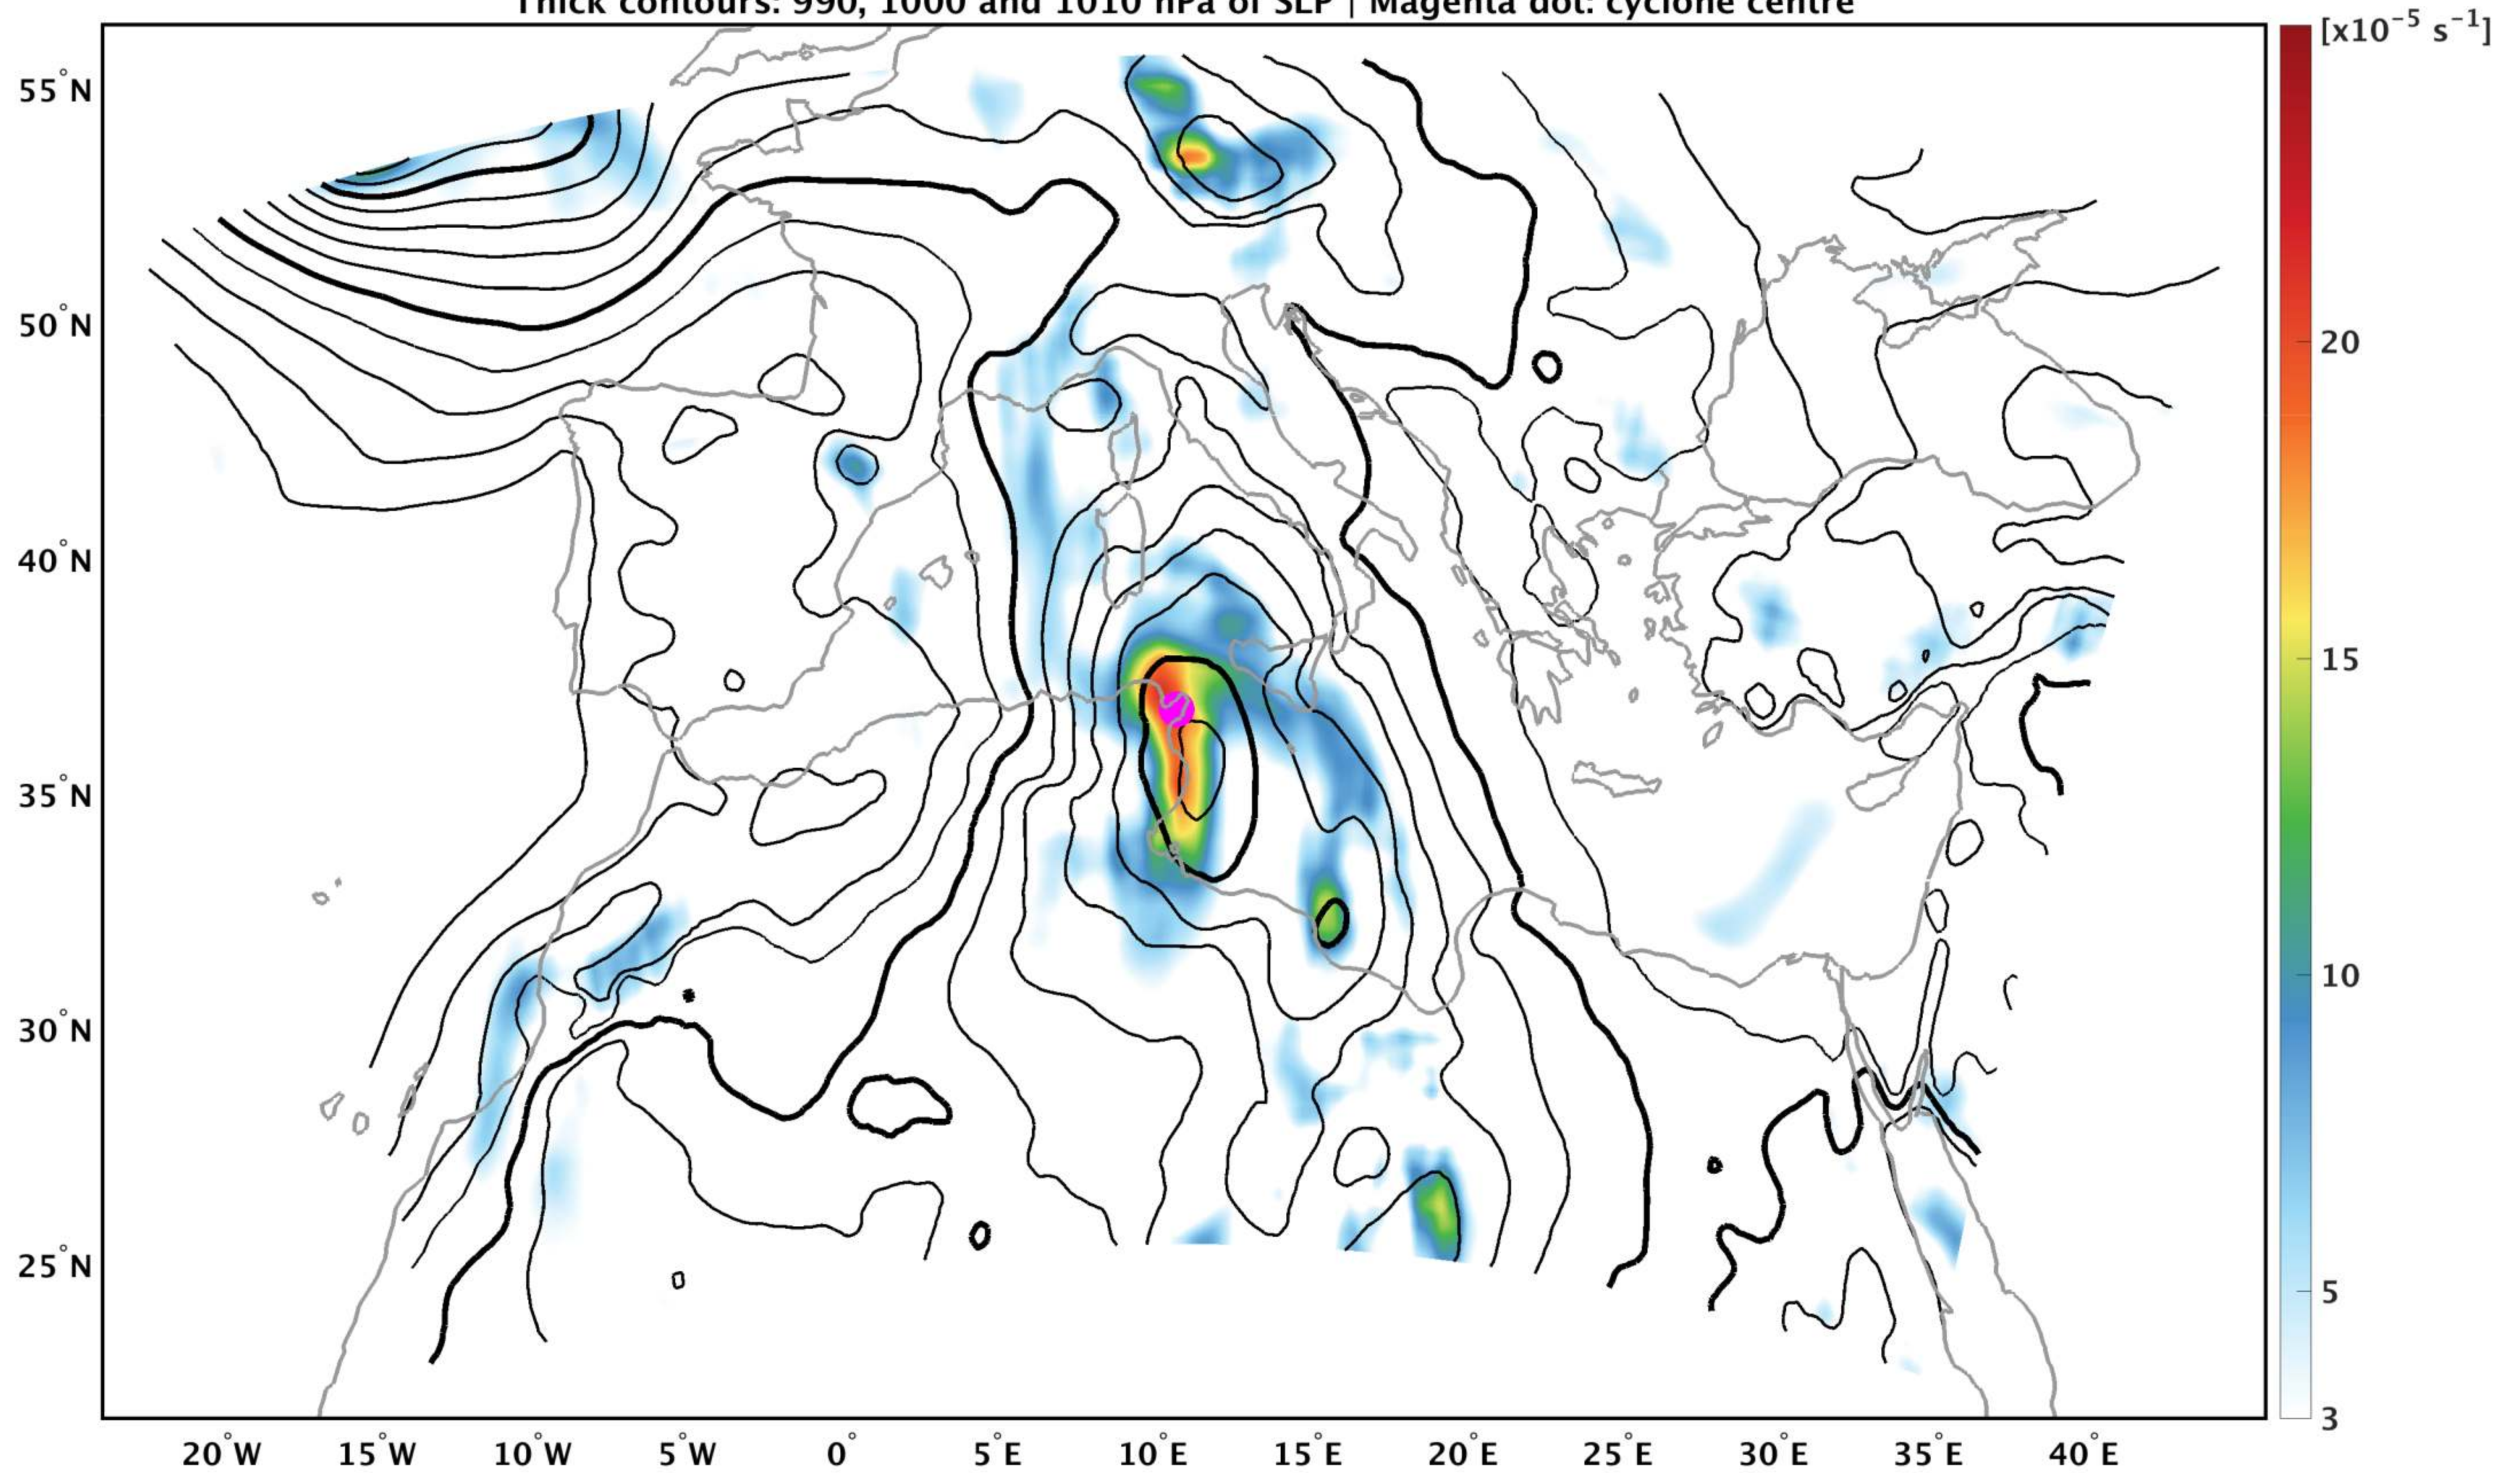



Case-38; Date: 28/11/2008

Colour: Relative vorticity ( $\times 10^{-5}$ ) | Contour: SLP (from 1018 hPa with an interval of 2 hPa)

Thick contours: 990, 1000 and 1010 hPa of SLP | Magenta dot: cyclone centre

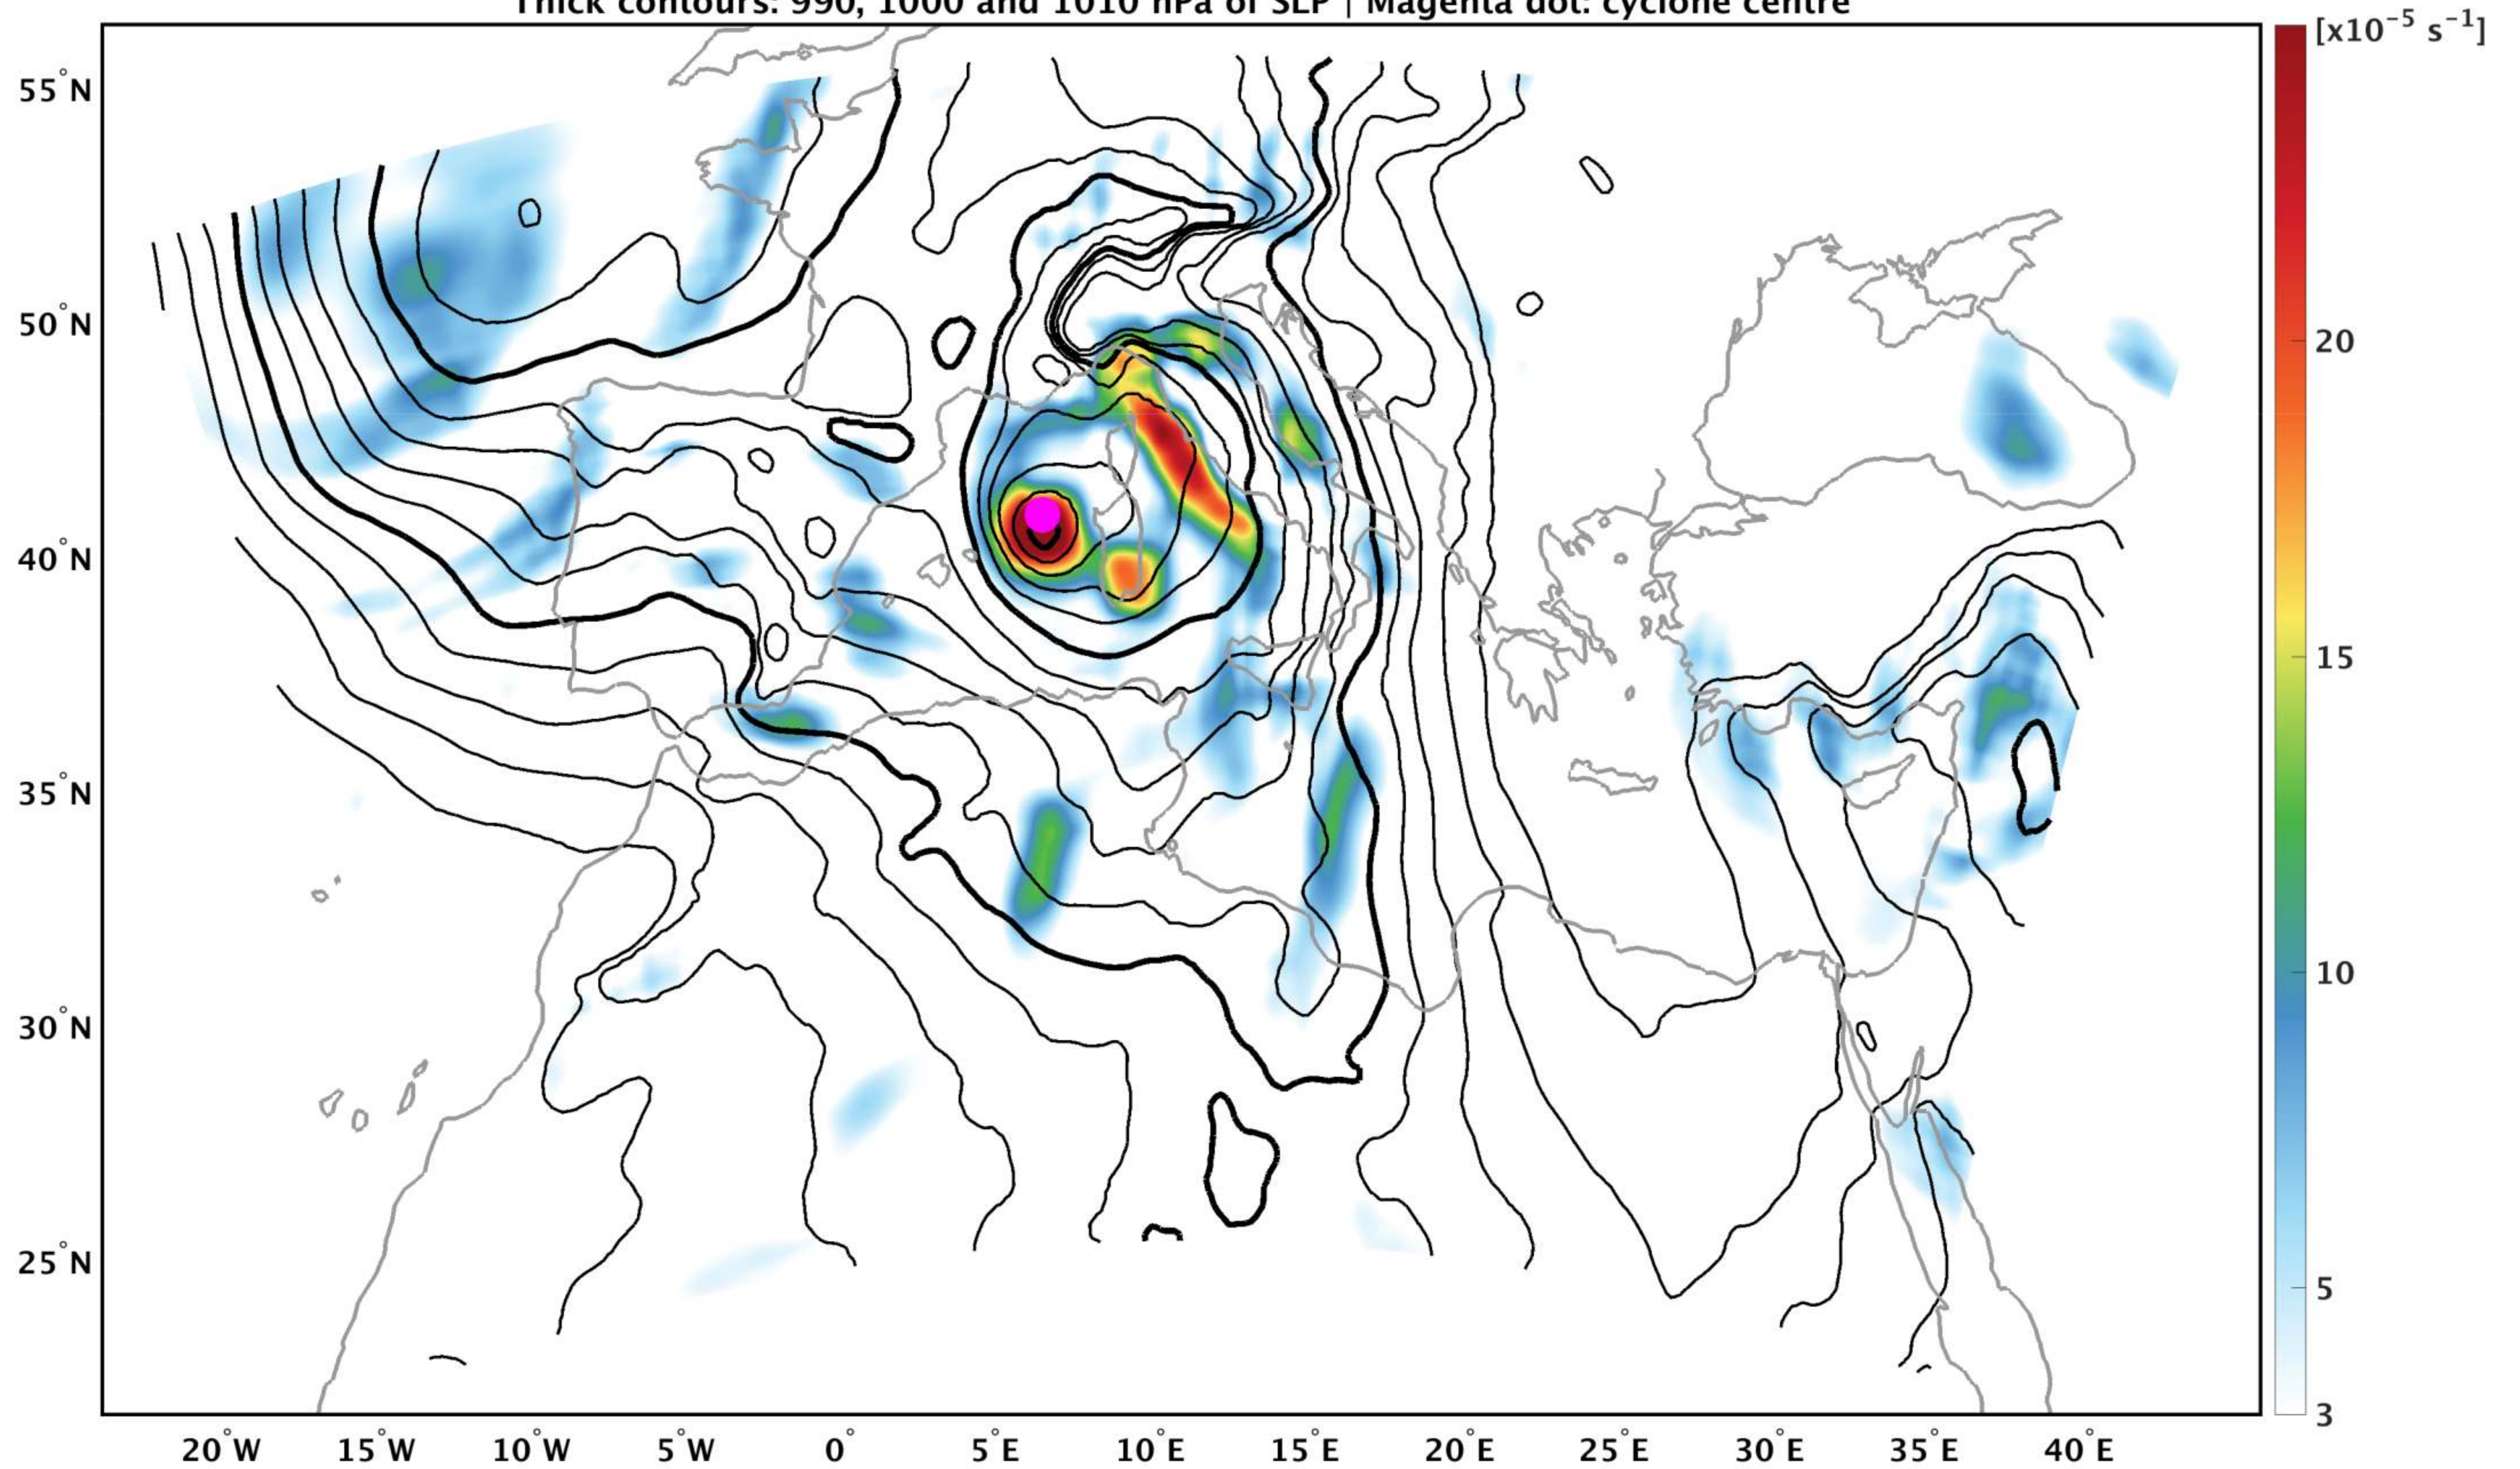



Case-39; Date: 16/1/2017

Colour: Relative vorticity ( $\times 10^{-5}$ ) | Contour: SLP (from 1018 hPa with an interval of 2 hPa)

Thick contours: 990, 1000 and 1010 hPa of SLP | Magenta dot: cyclone centre

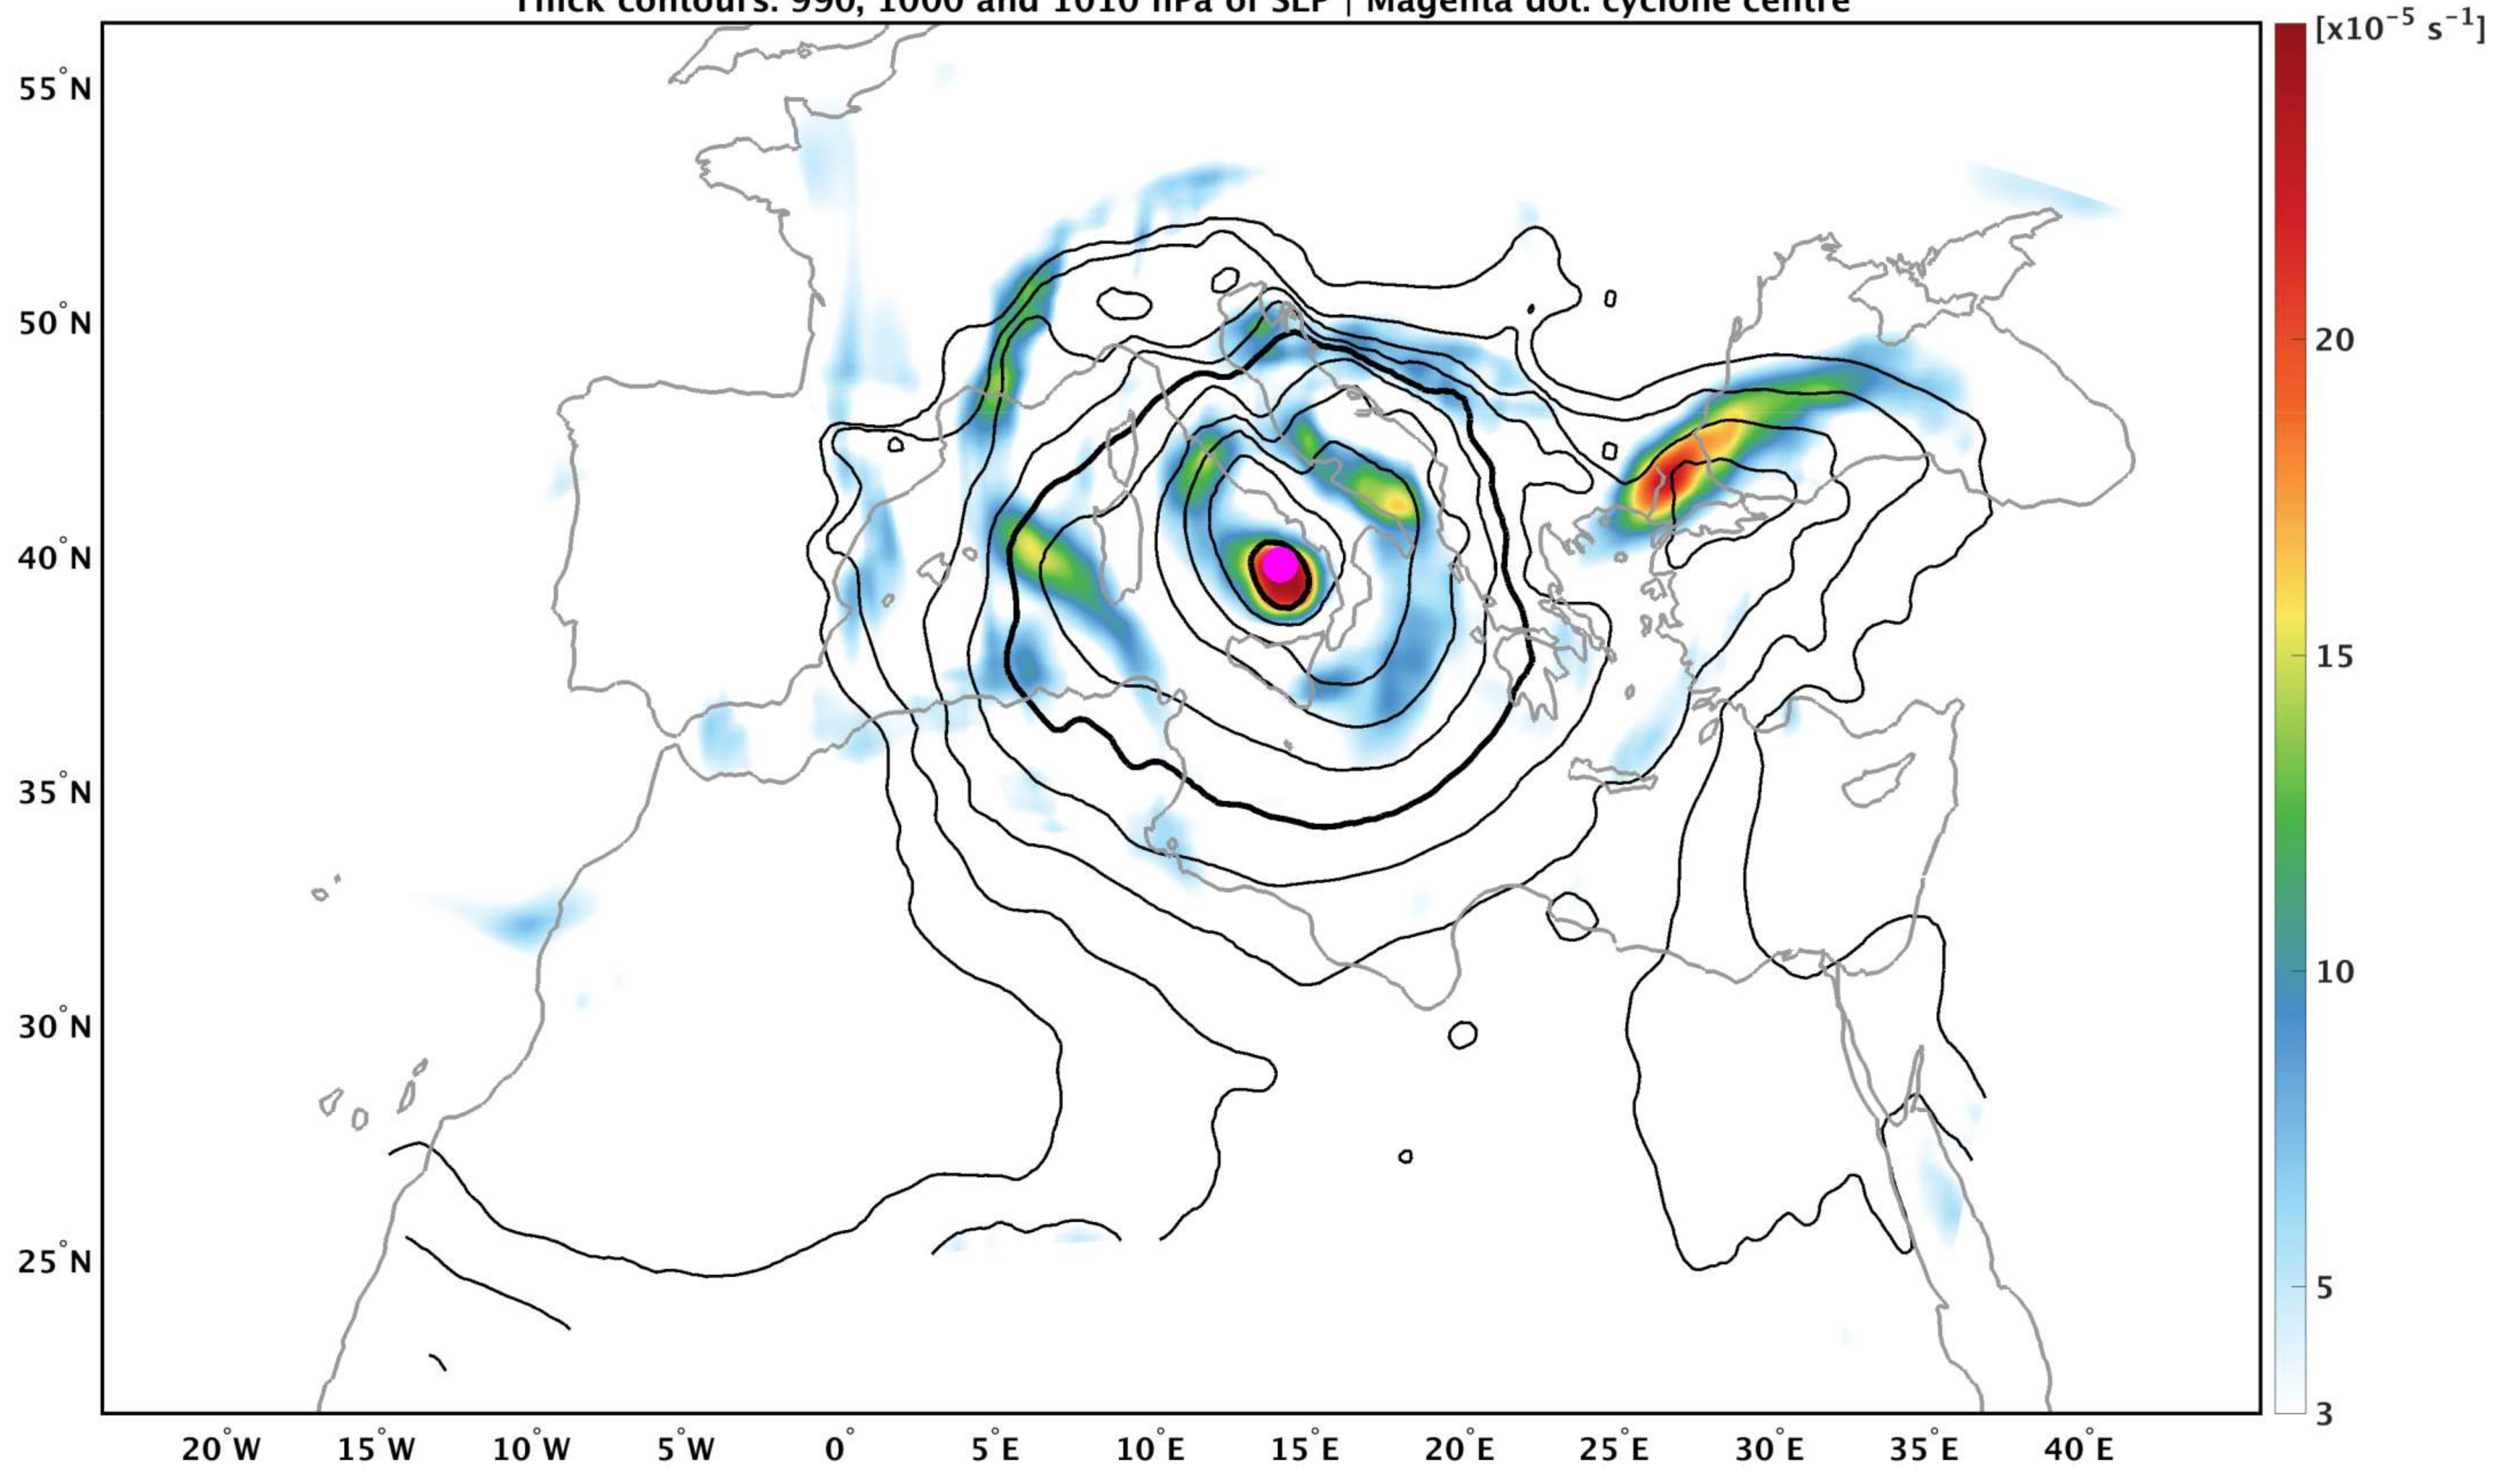



Case-40; Date: 8/2/2008

Colour: Relative vorticity ( $\times 10^{-5}$ ) | Contour: SLP (from 1018 hPa with an interval of 2 hPa)

Thick contours: 990, 1000 and 1010 hPa of SLP | Magenta dot: cyclone centre

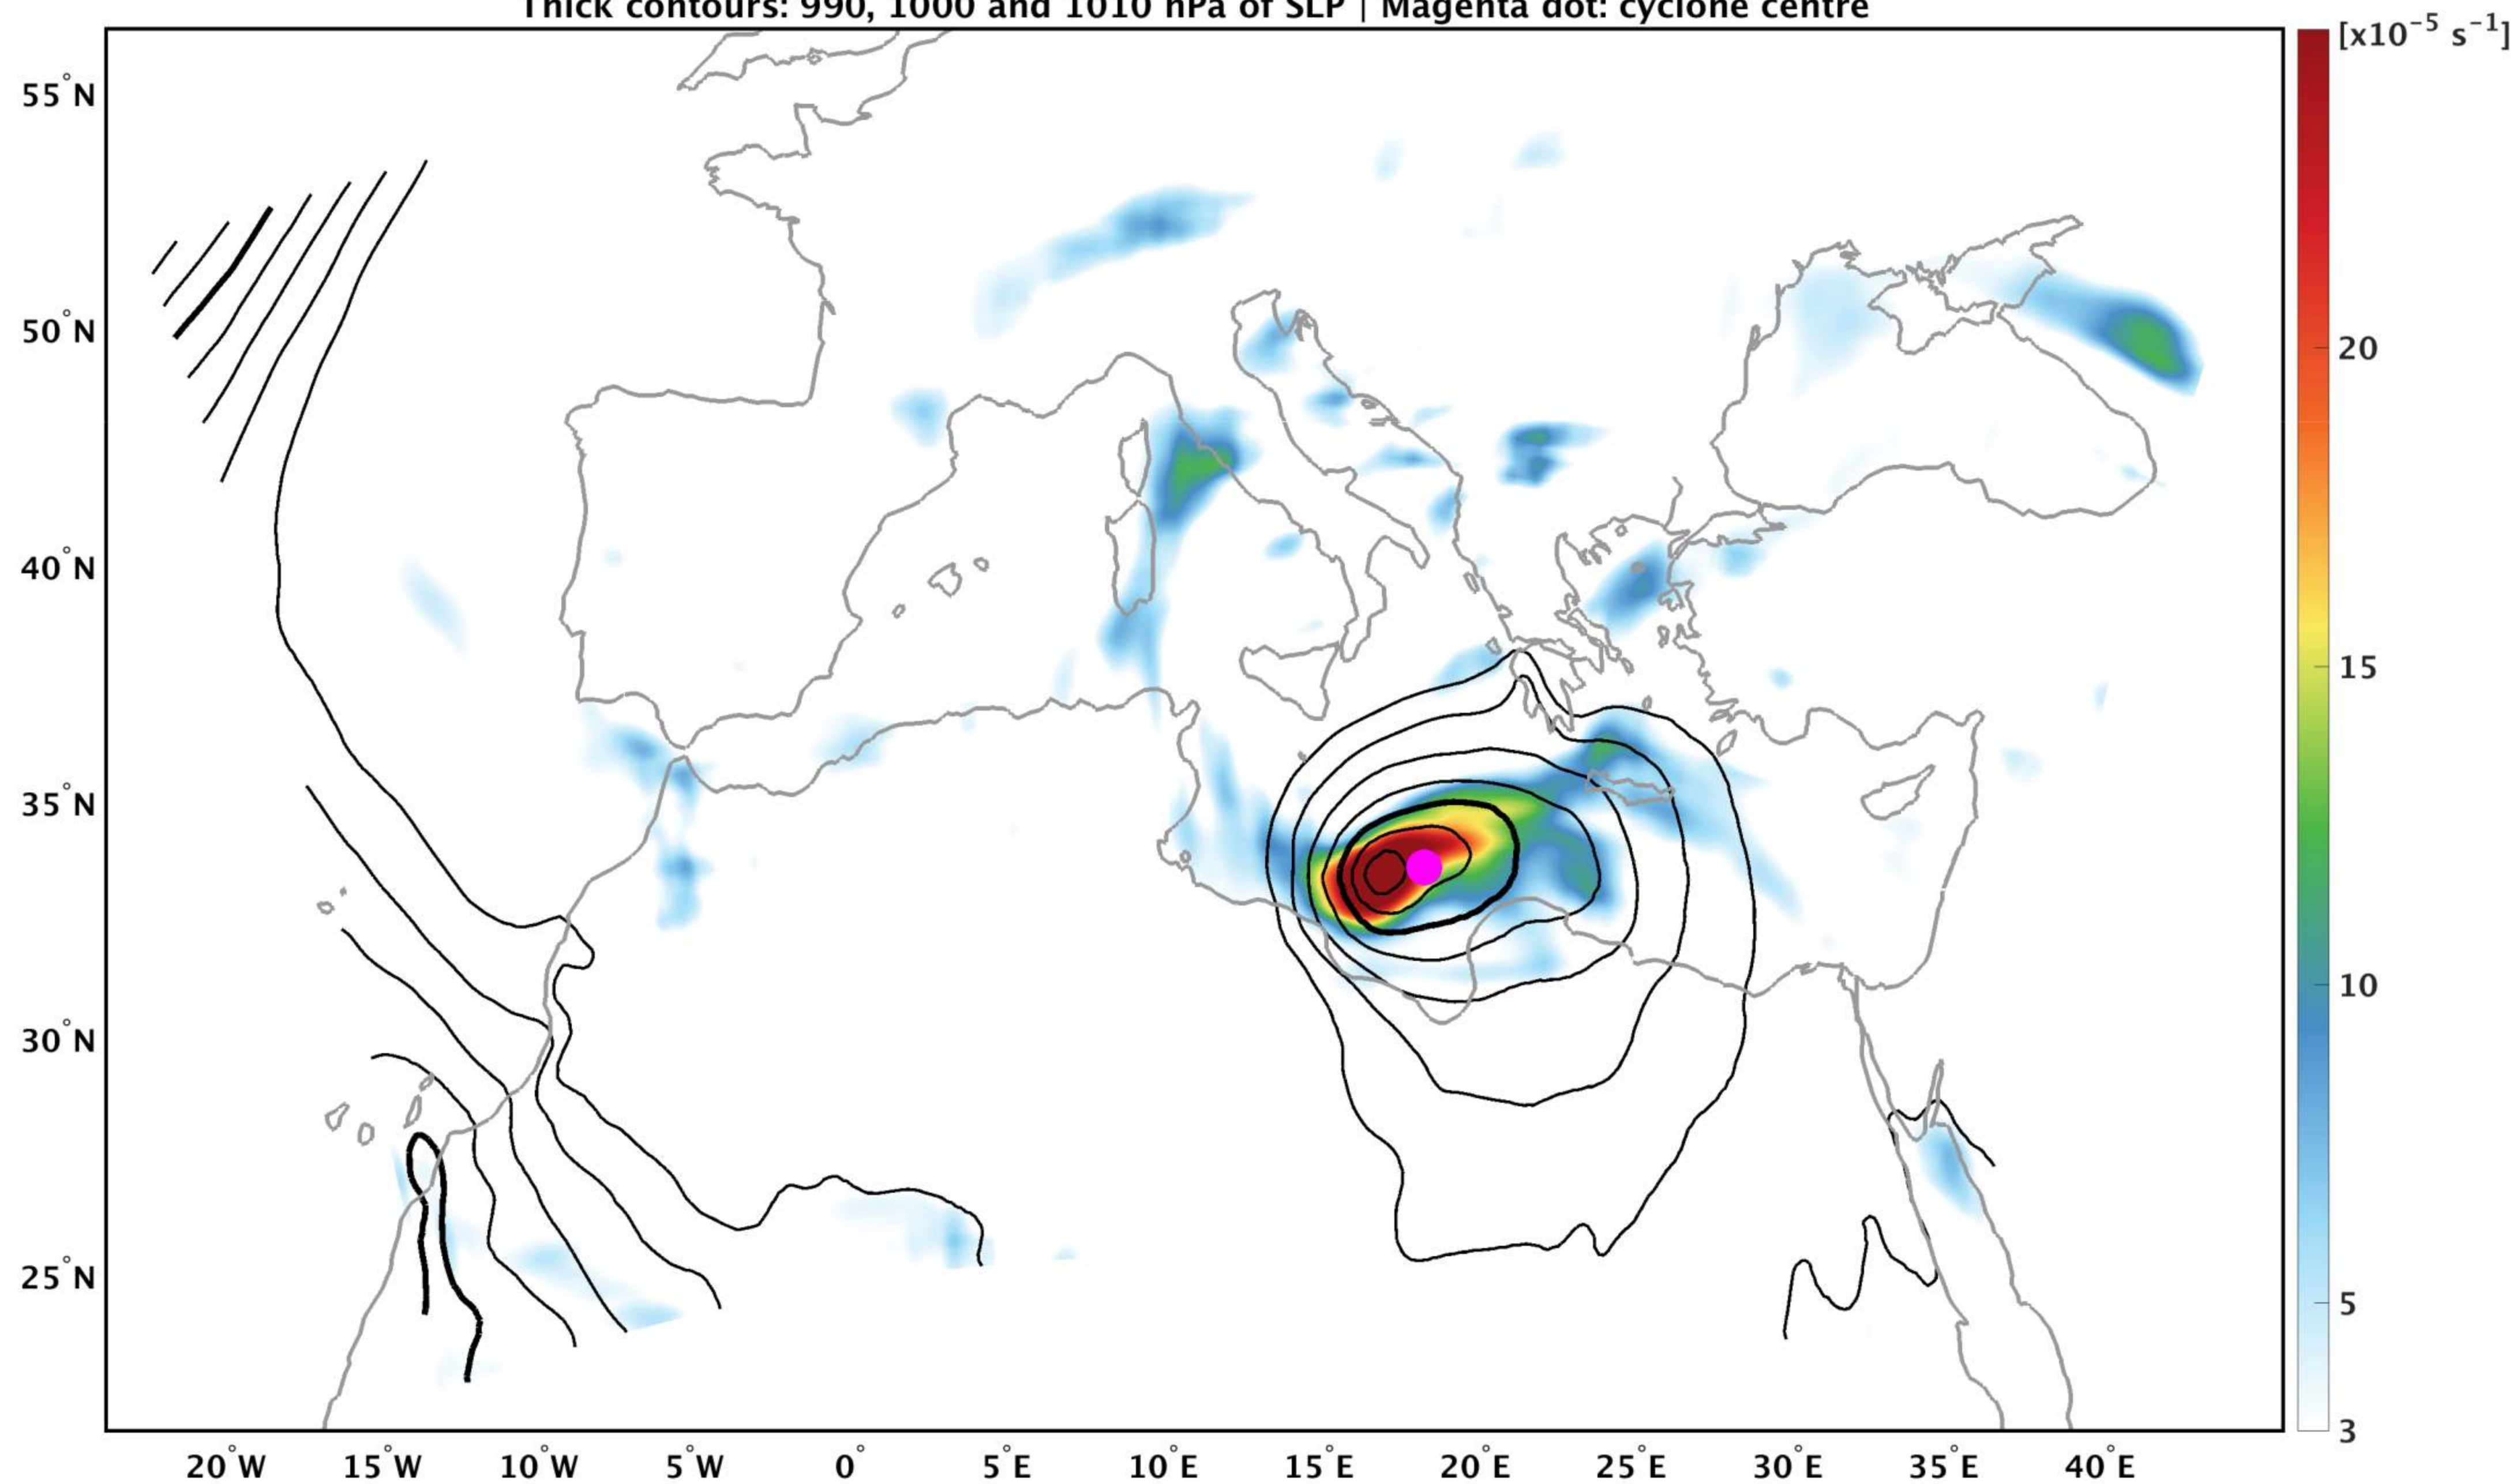



Case-41; Date: 22/1/2011

Colour: Relative vorticity ( $\times 10^{-5}$ ) | Contour: SLP (from 1018 hPa with an interval of 2 hPa)

Thick contours: 990, 1000 and 1010 hPa of SLP | Magenta dot: cyclone centre

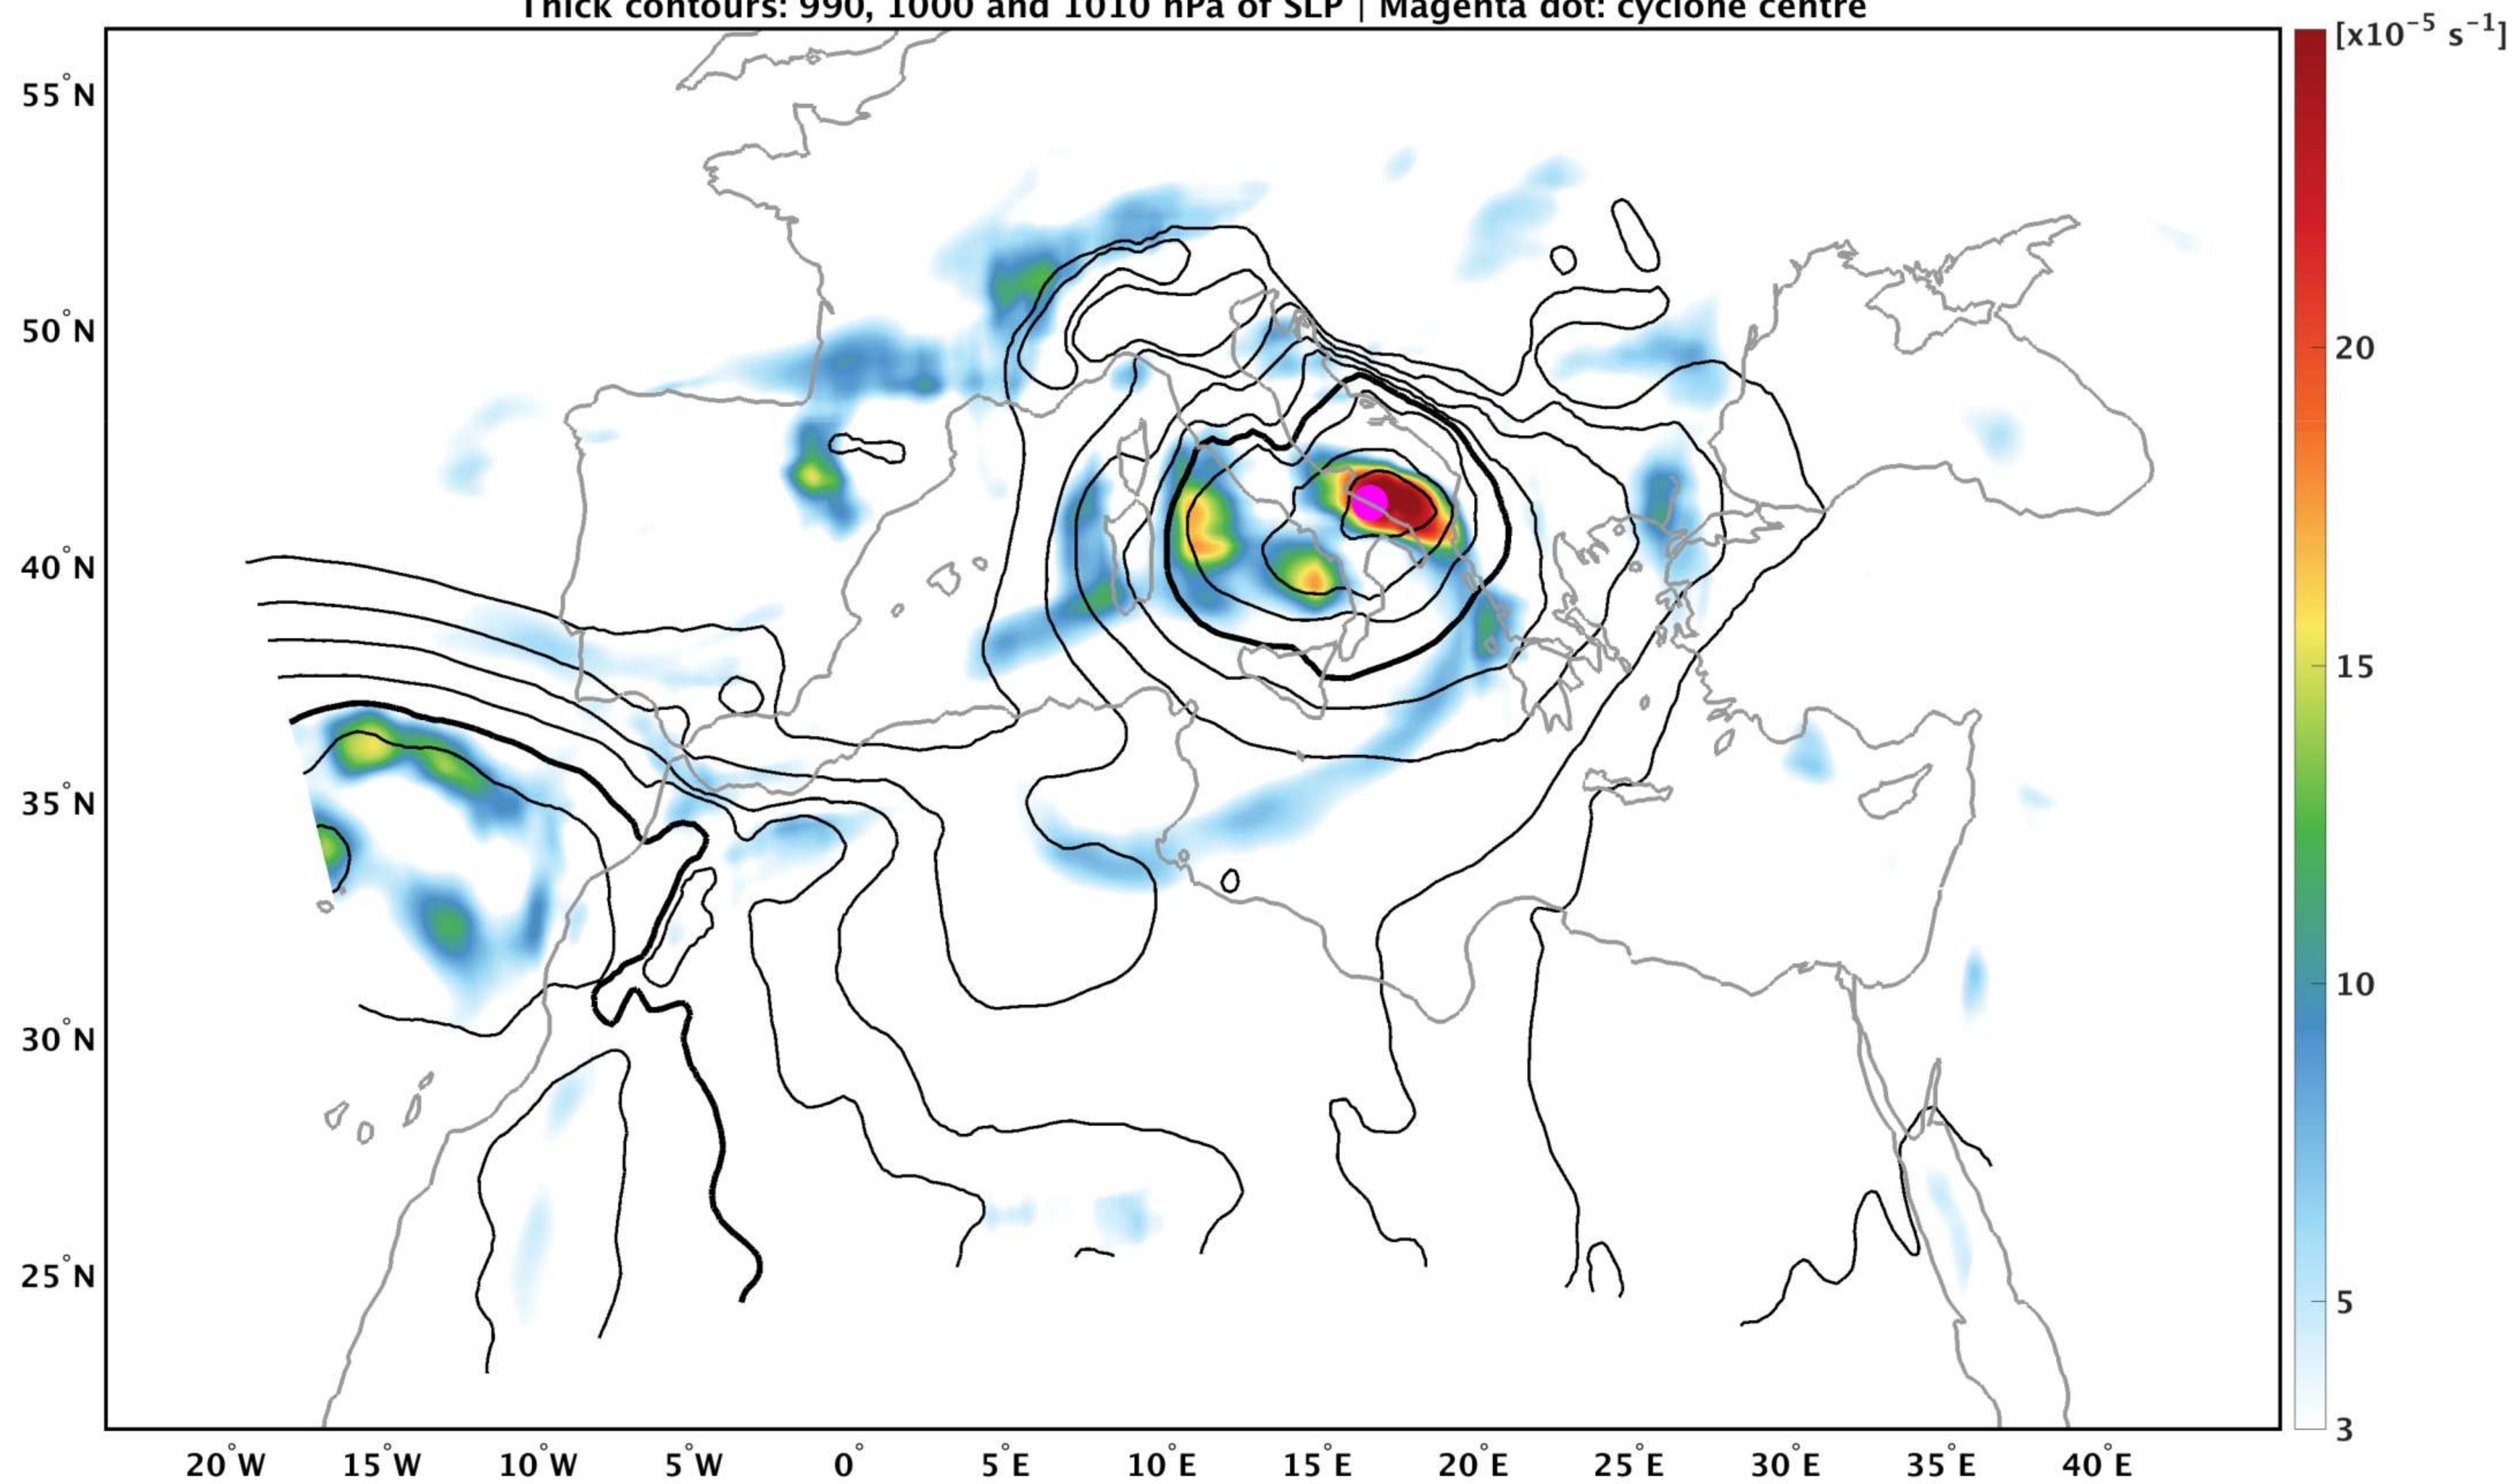



Case-42; Date: 2/3/2011

Colour: Relative vorticity ( $\times 10^{-5}$ ) | Contour: SLP (from 1018 hPa with an interval of 2 hPa)

Thick contours: 990, 1000 and 1010 hPa of SLP | Magenta dot: cyclone centre

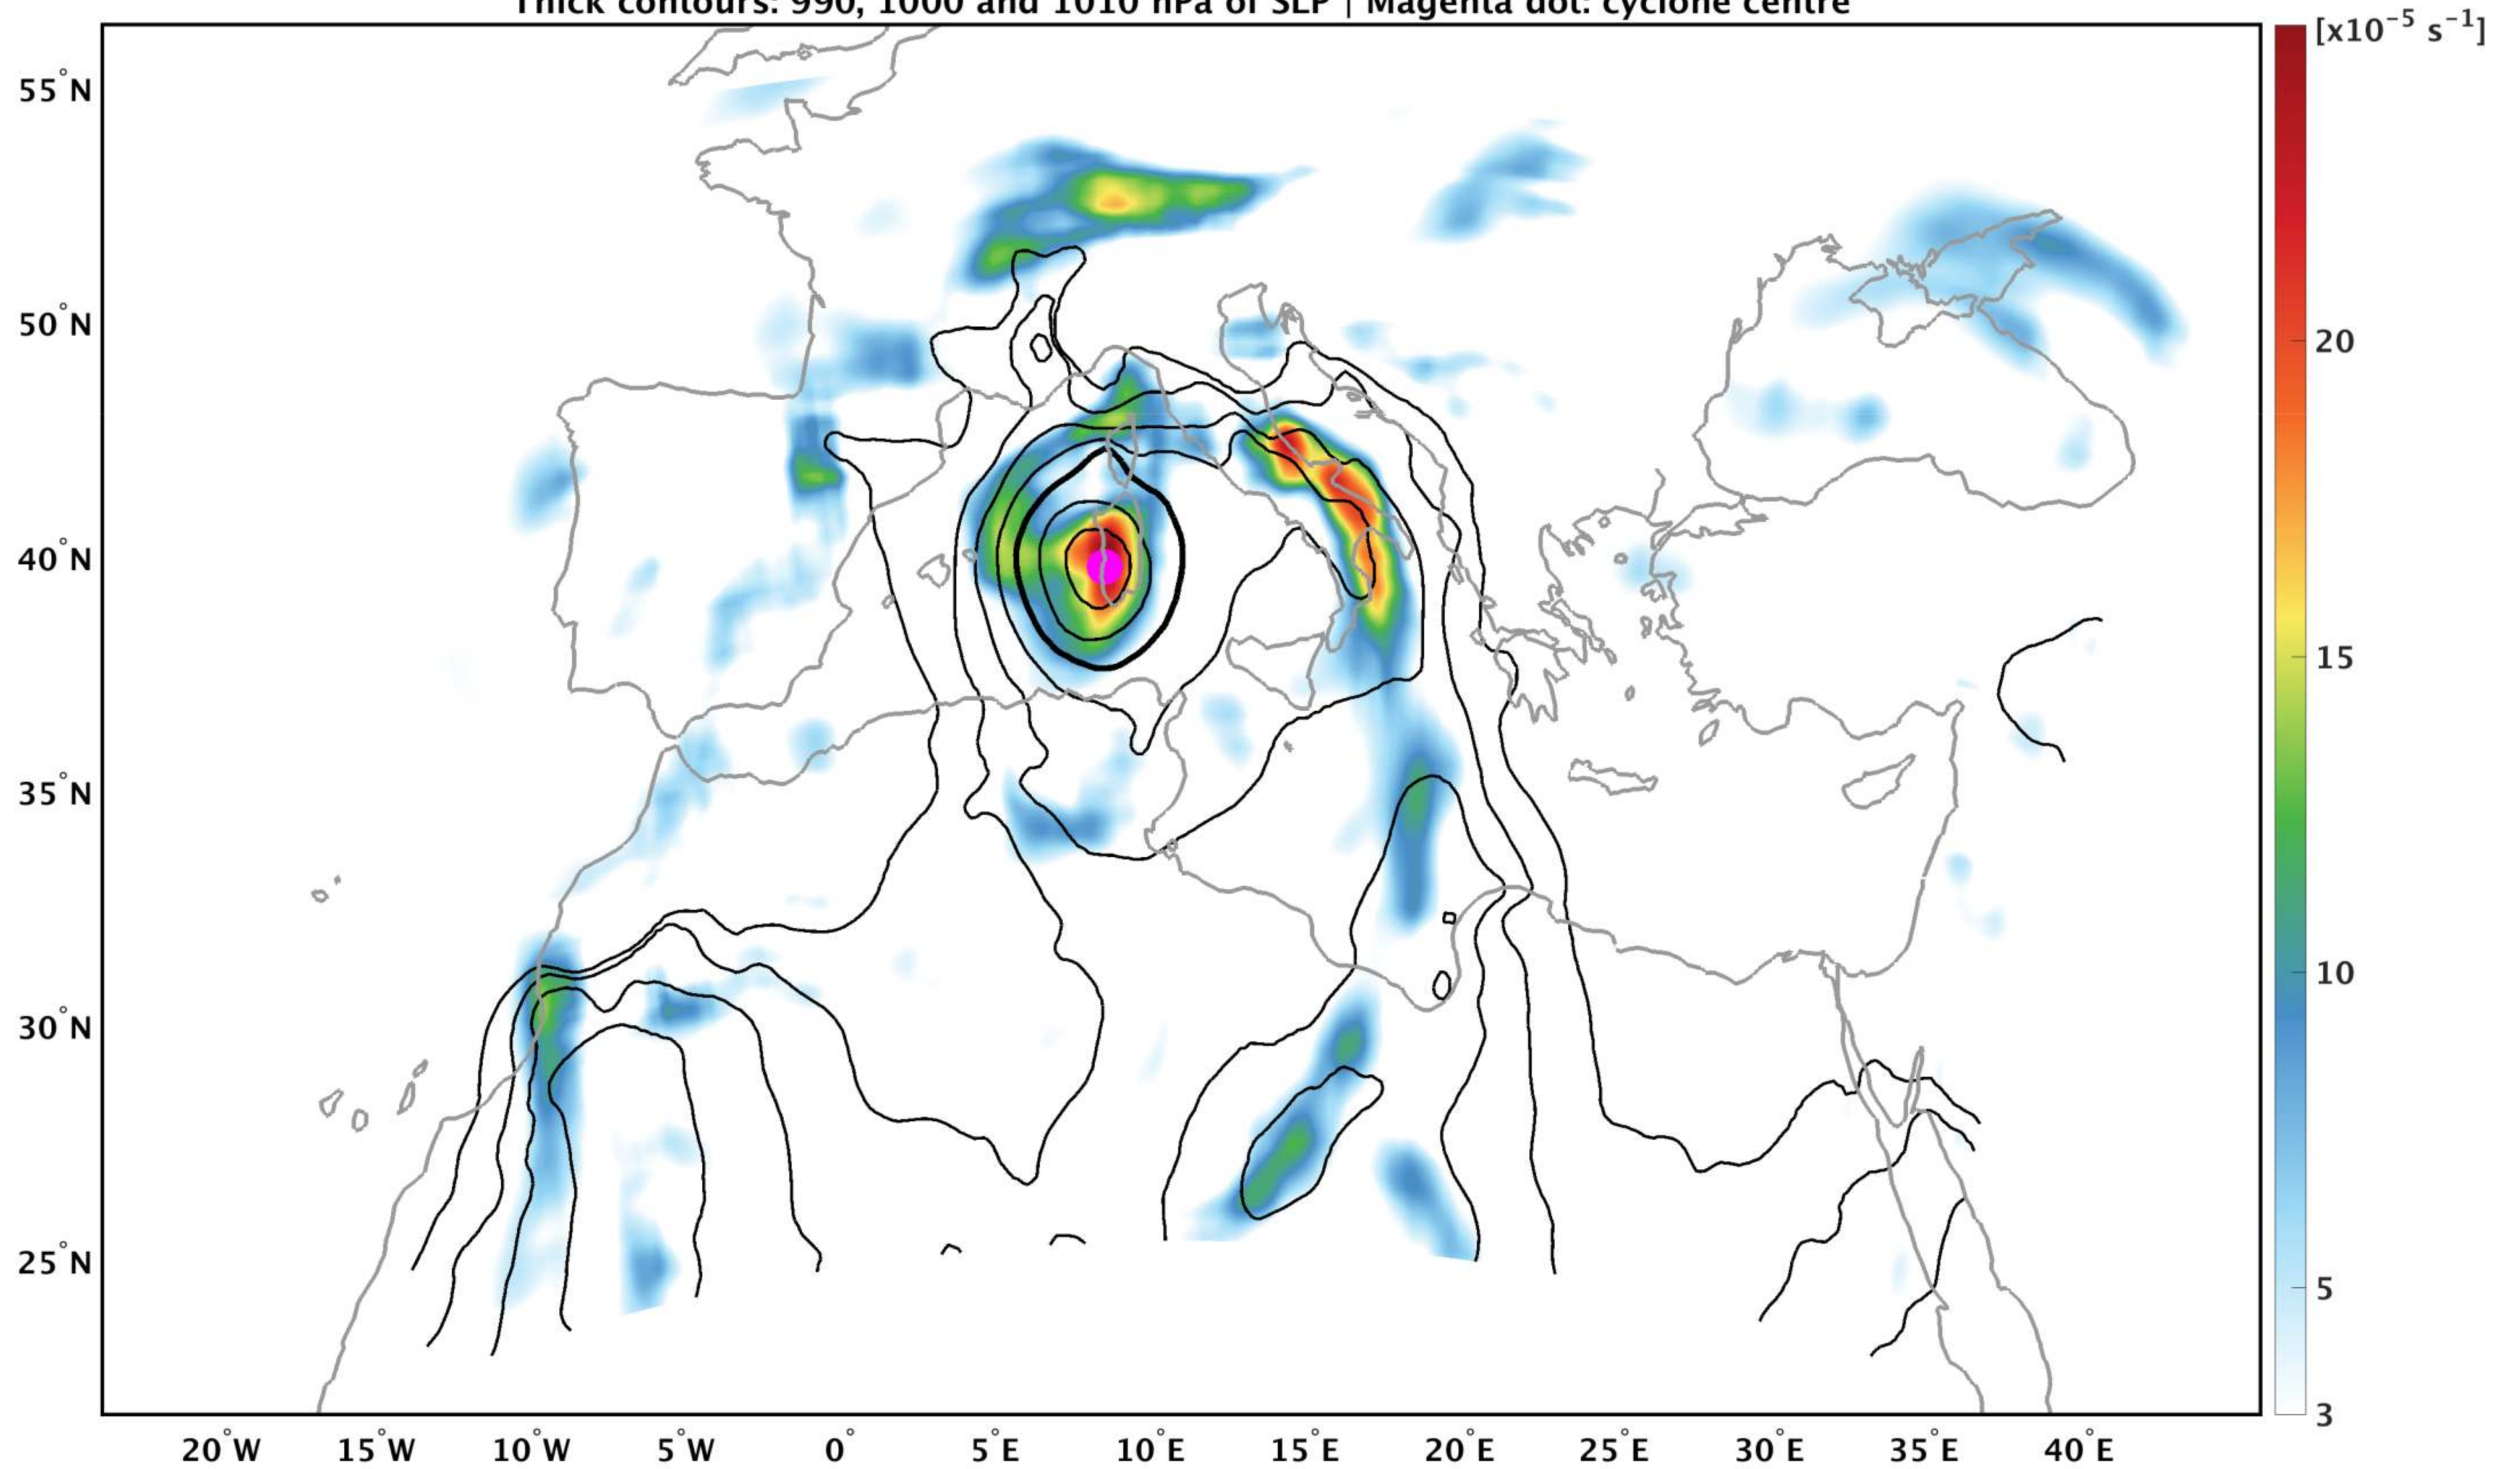



Case-43; Date: 18/2/2014

Colour: Relative vorticity ( $\times 10^{-5}$ ) | Contour: SLP (from 1018 hPa with an interval of 2 hPa)

Thick contours: 990, 1000 and 1010 hPa of SLP | Magenta dot: cyclone centre

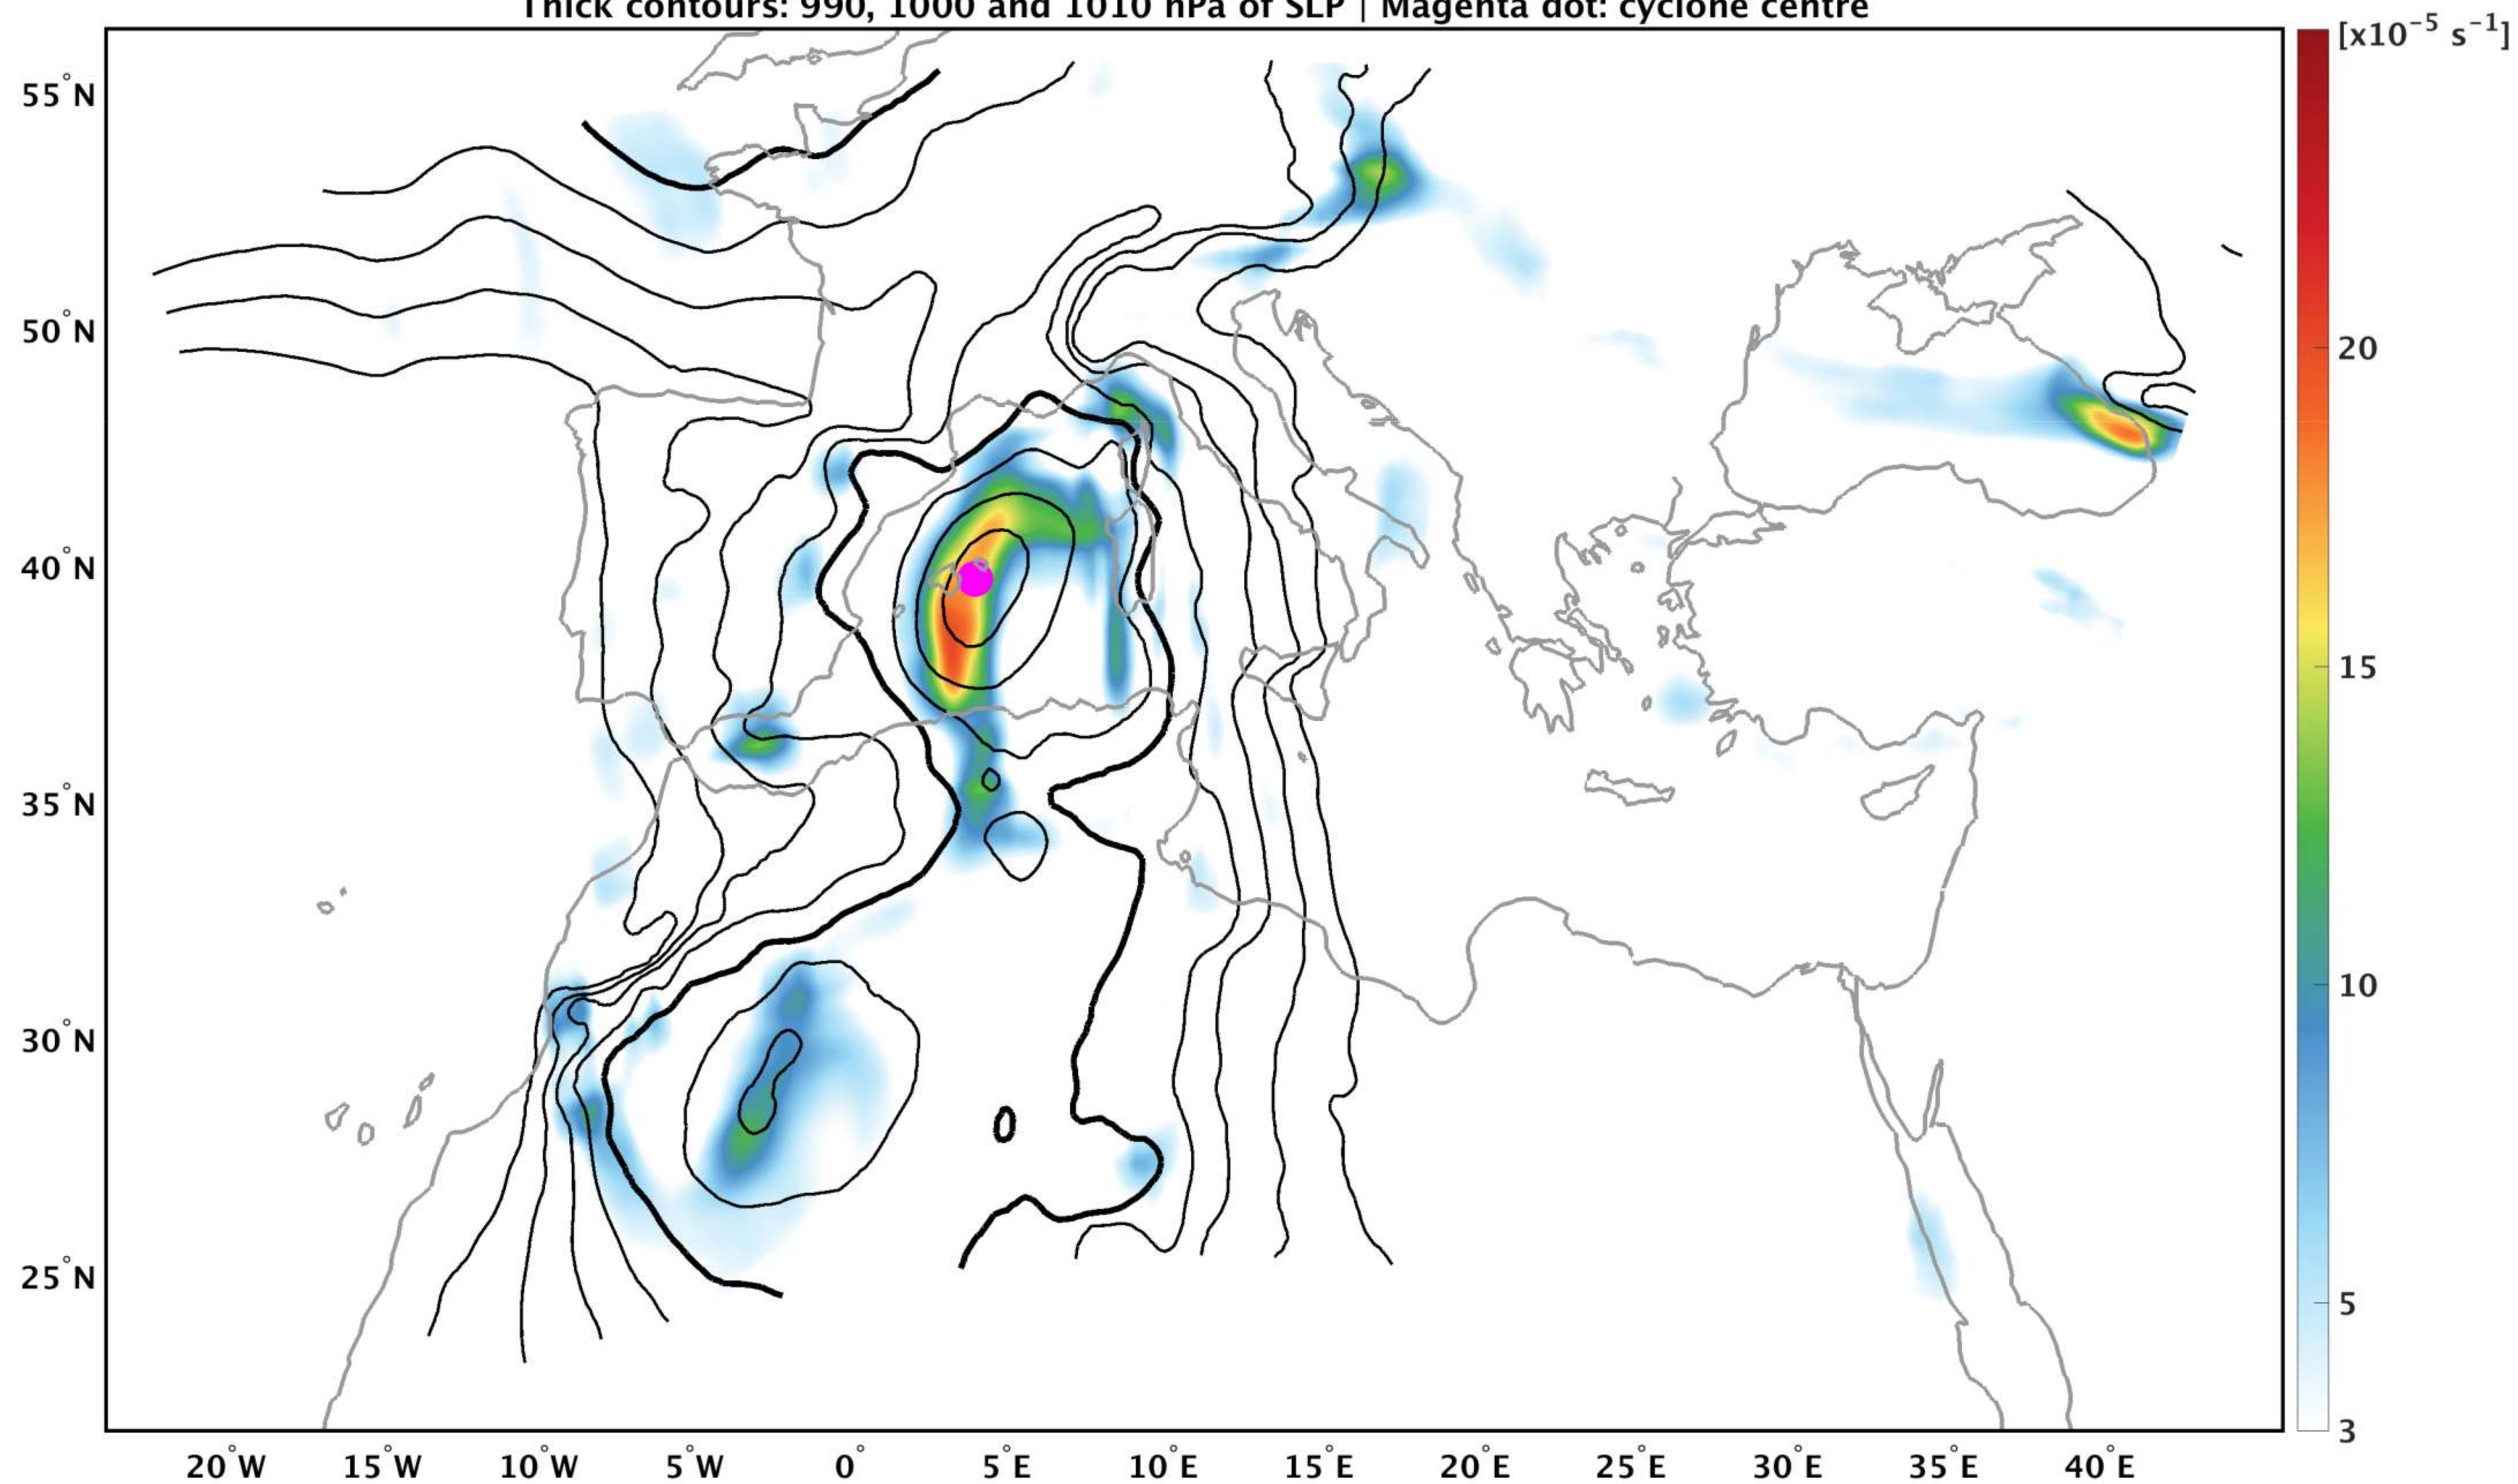



Case-44; Date: 23/4/2014

Colour: Relative vorticity ( $\times 10^{-5}$ ) | Contour: SLP (from 1018 hPa with an interval of 2 hPa)

Thick contours: 990, 1000 and 1010 hPa of SLP | Magenta dot: cyclone centre

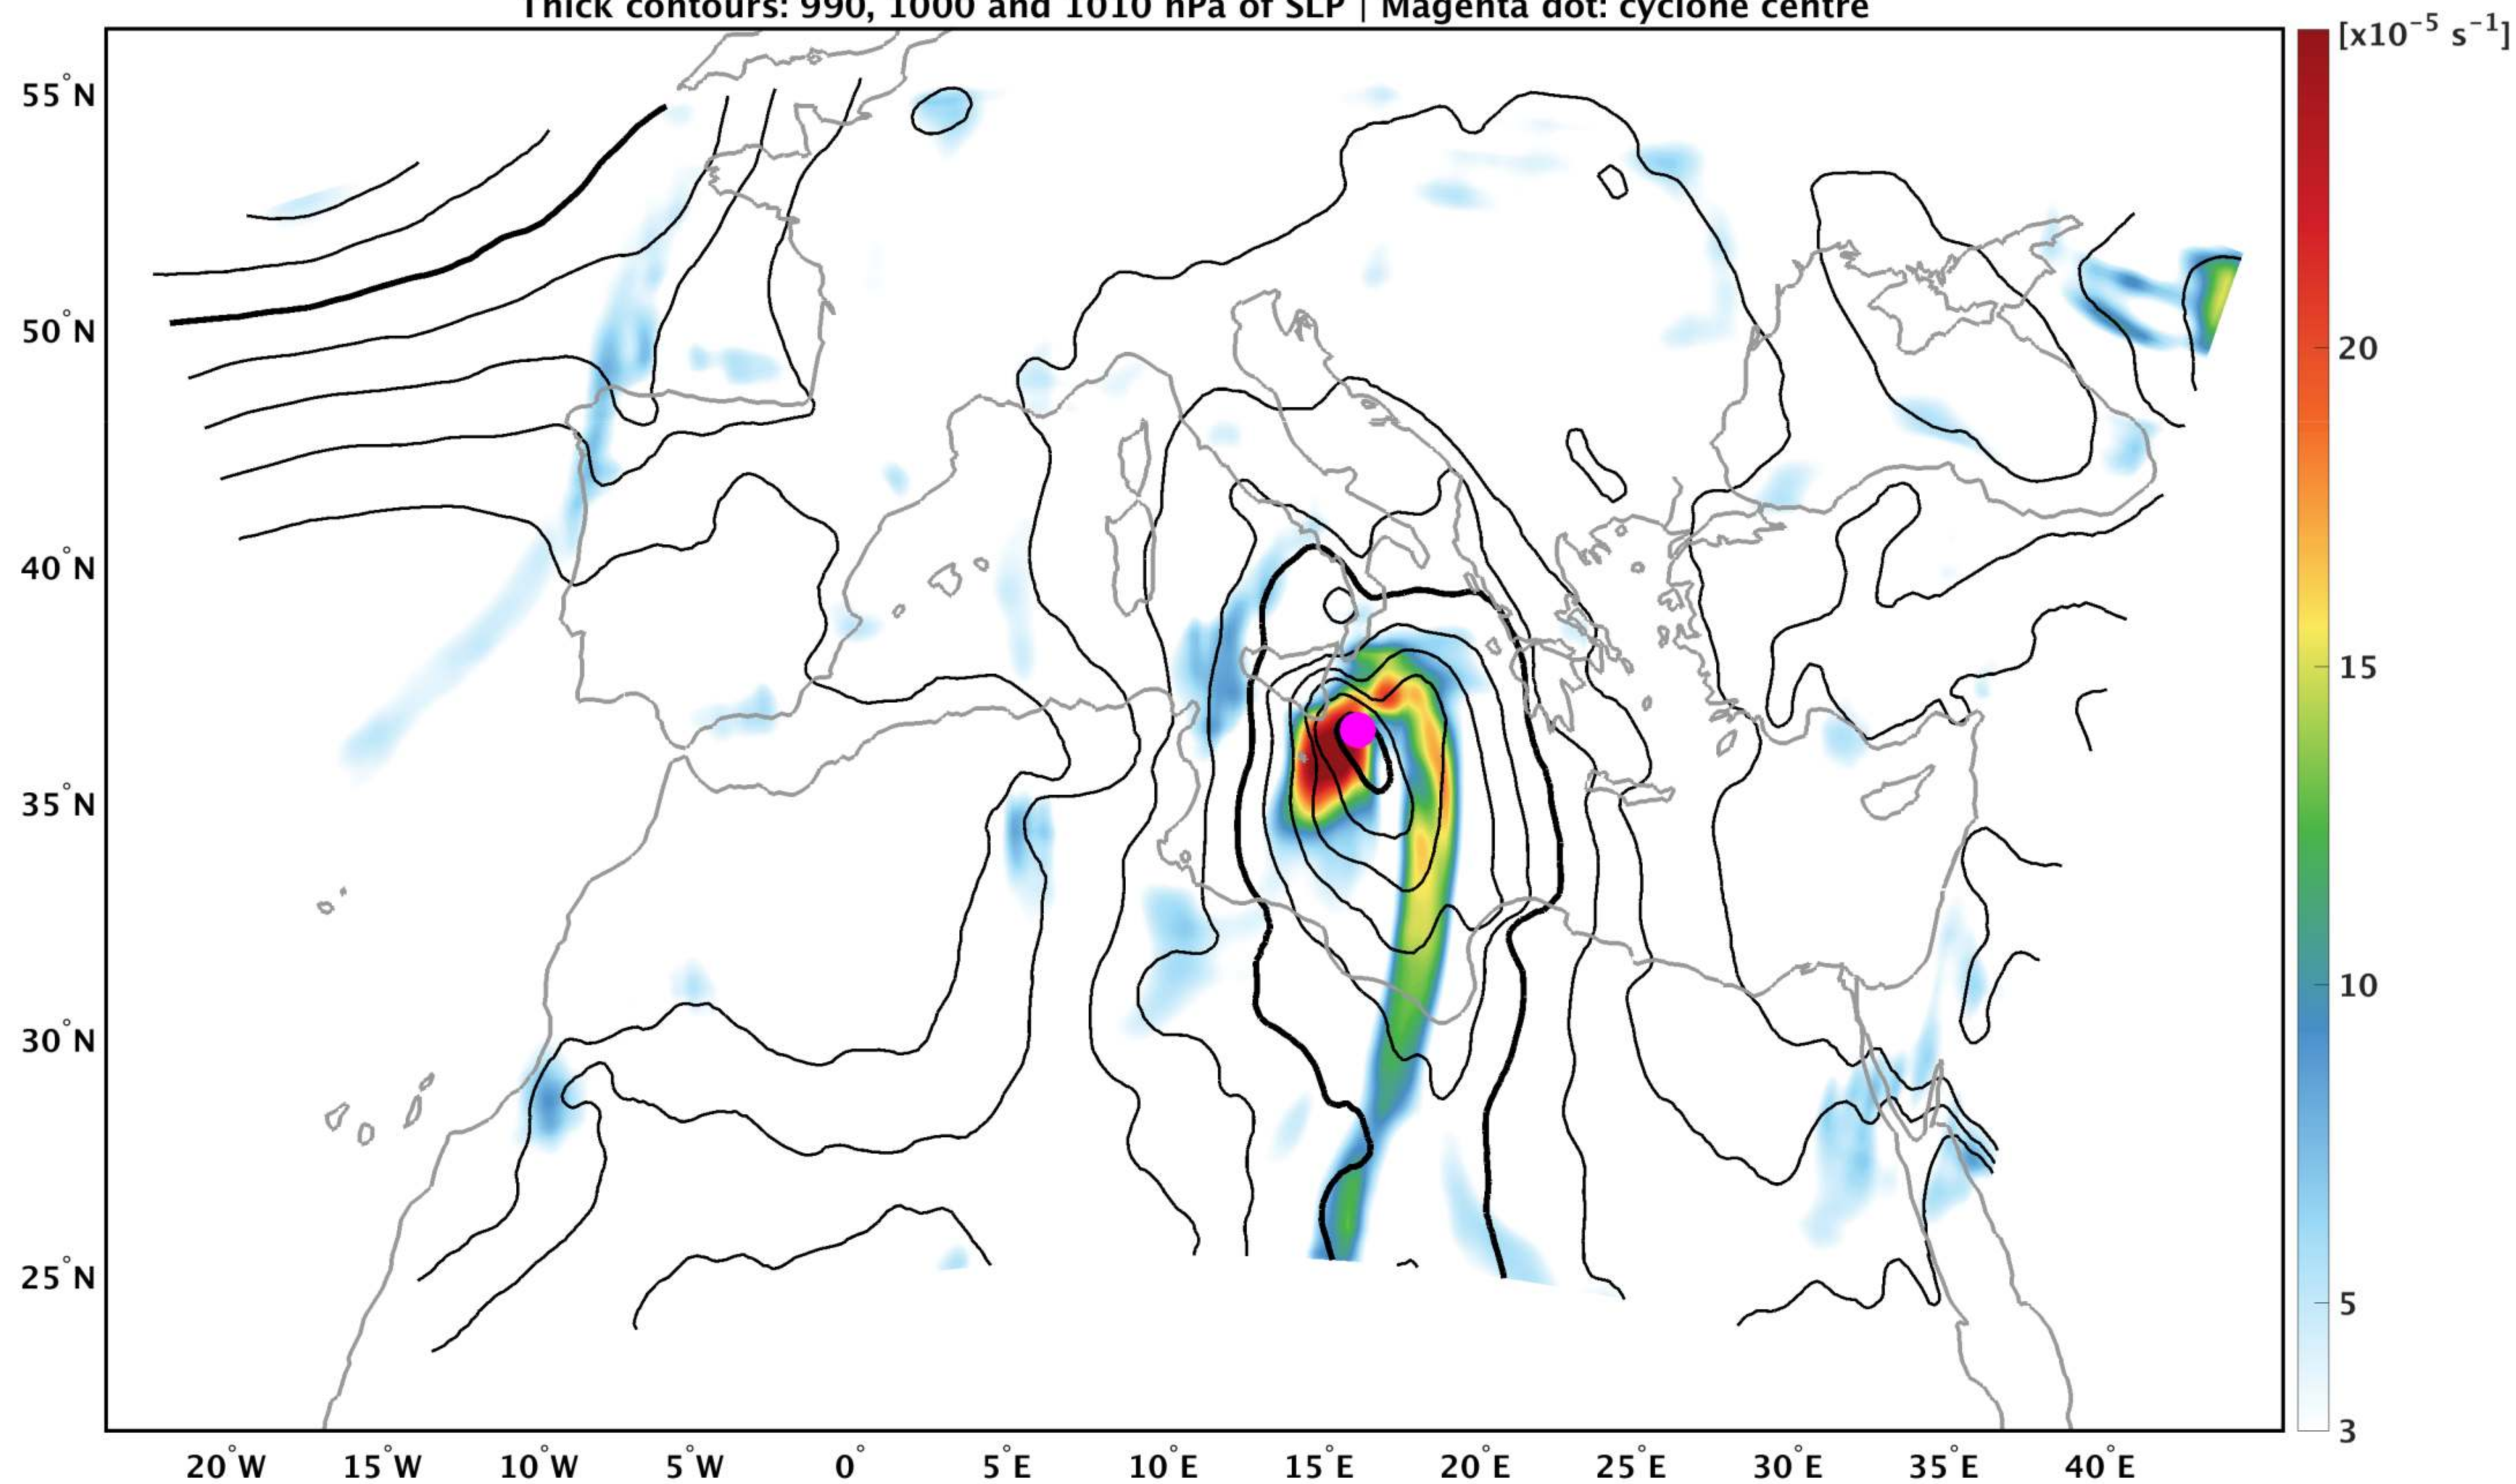



Case-45; Date: 19/1/2015

Colour: Relative vorticity ( $\times 10^{-5}$ ) | Contour: SLP (from 1018 hPa with an interval of 2 hPa)

Thick contours: 990, 1000 and 1010 hPa of SLP | Magenta dot: cyclone centre

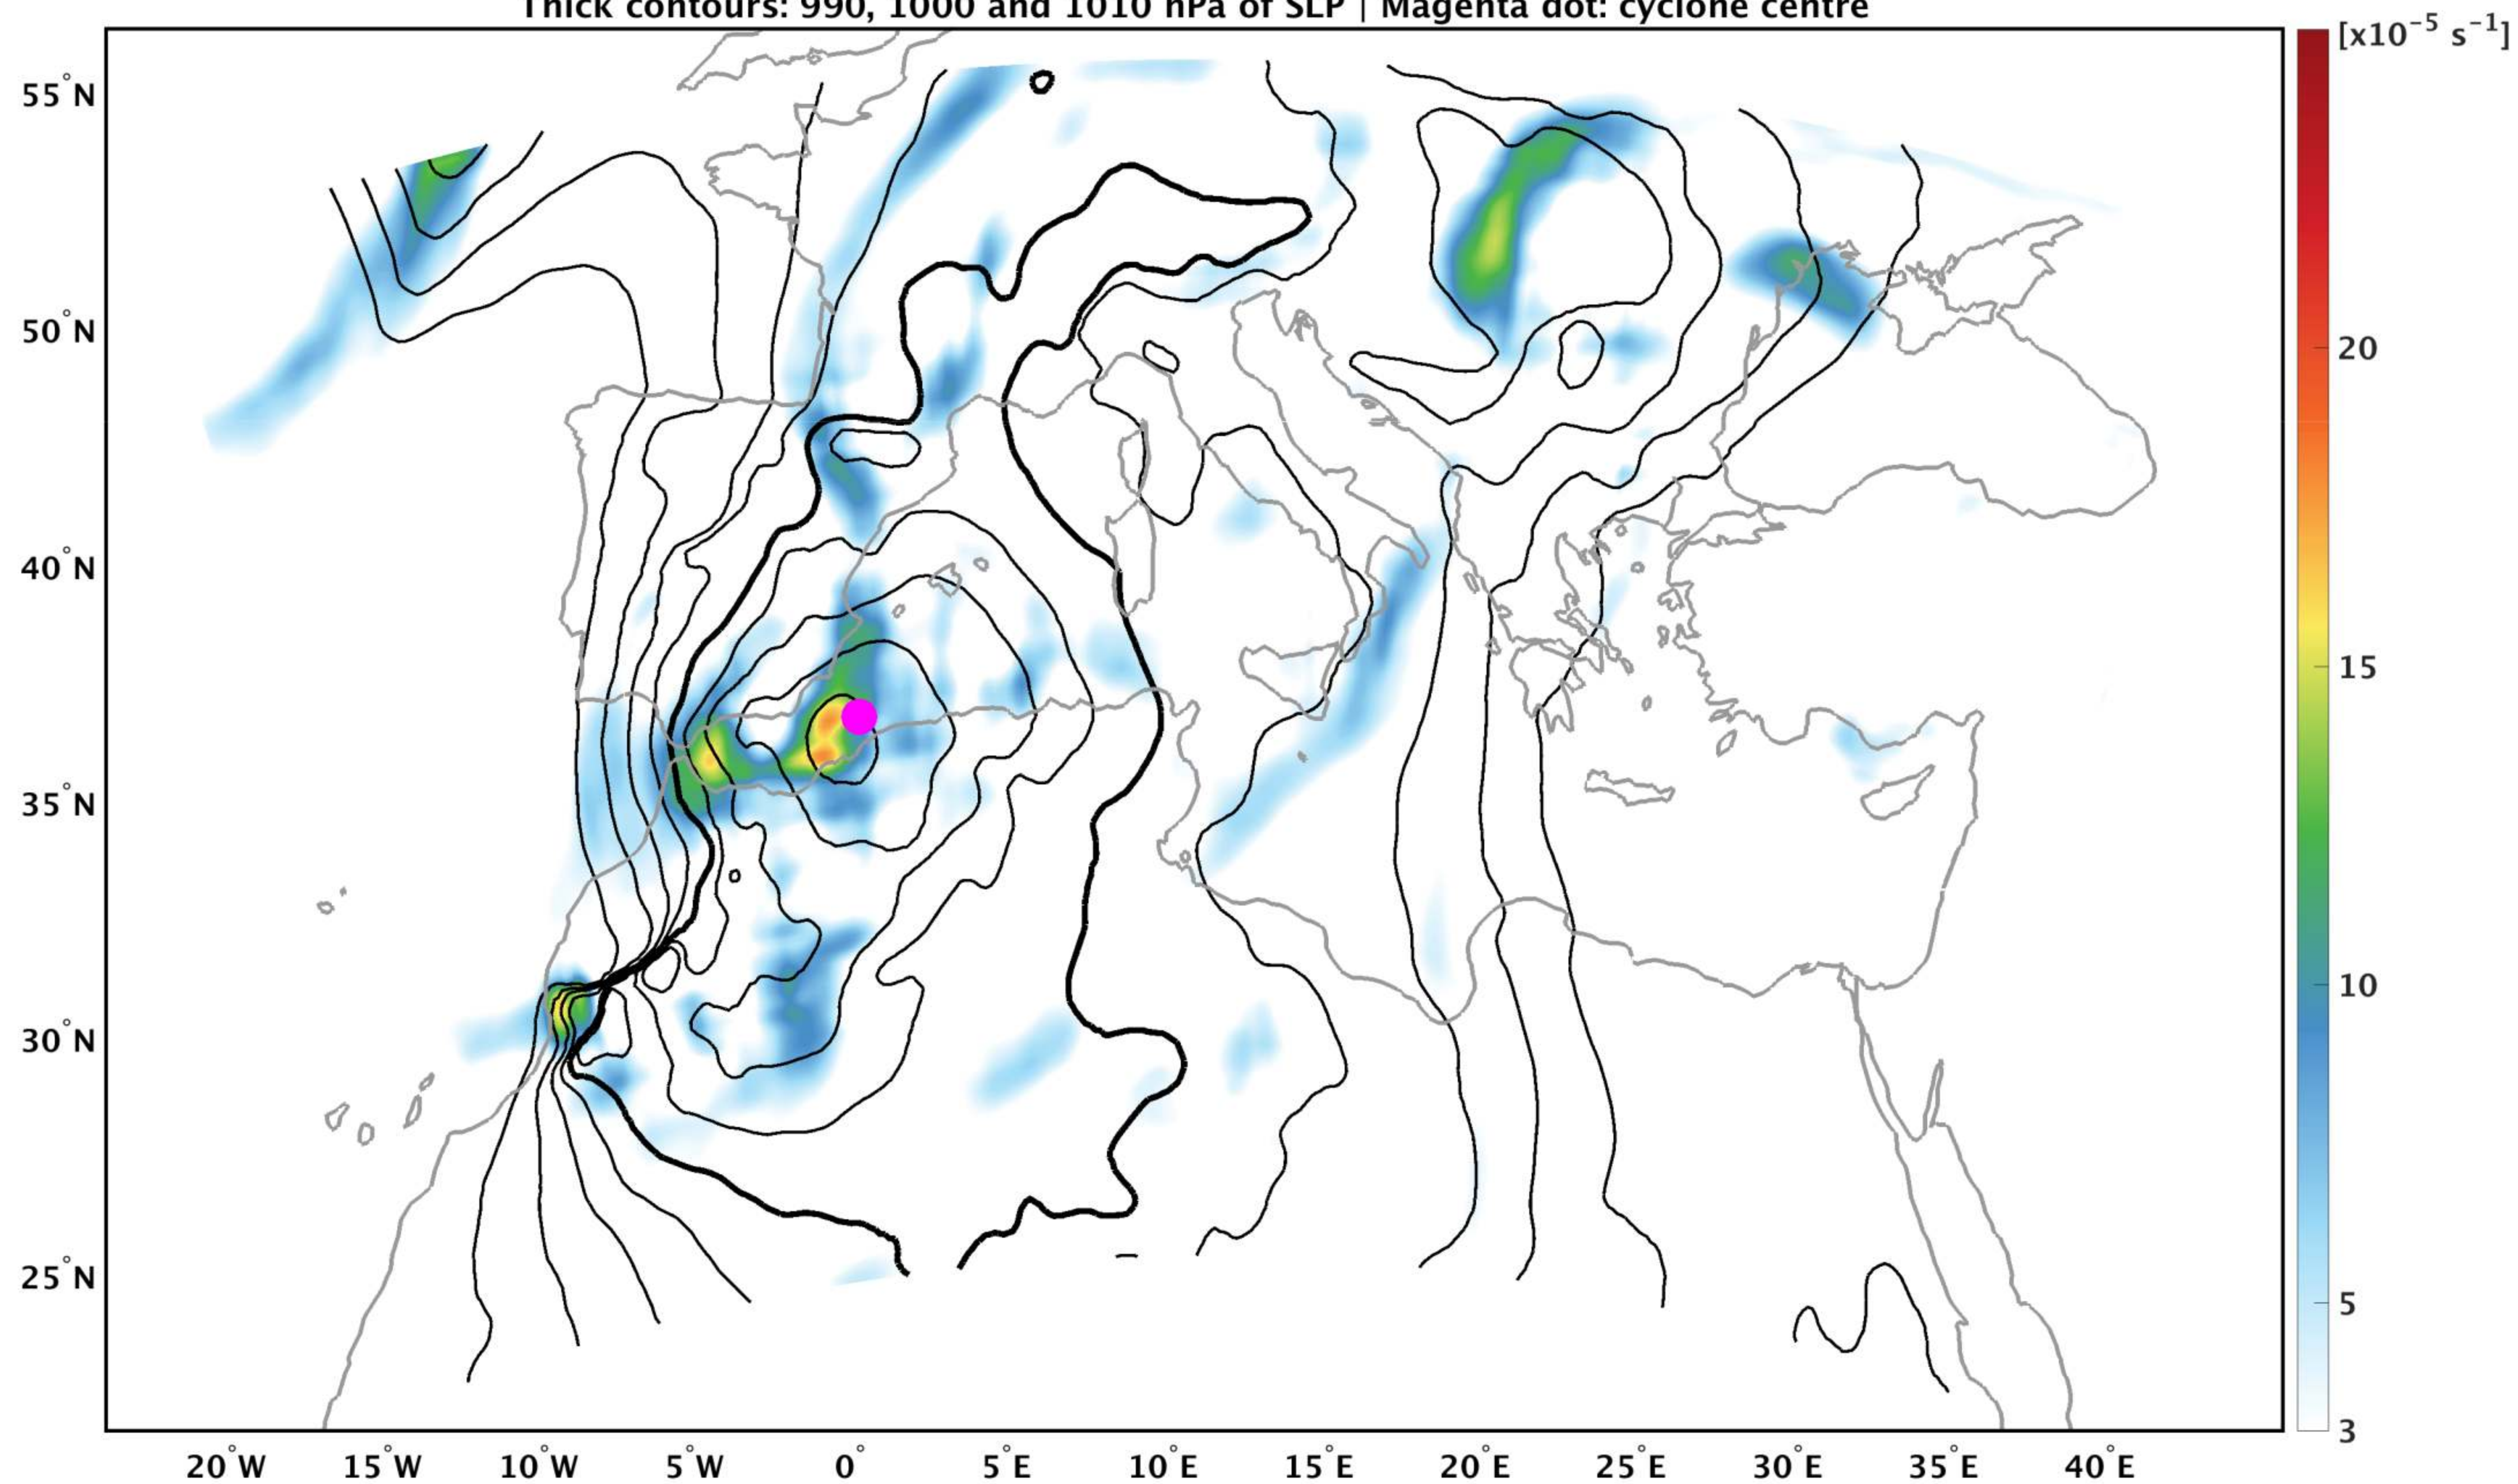



Case-46; Date: 7/11/2014

Colour: Relative vorticity ( $\times 10^{-5}$ ) | Contour: SLP (from 1018 hPa with an interval of 2 hPa)

Thick contours: 990, 1000 and 1010 hPa of SLP | Magenta dot: cyclone centre

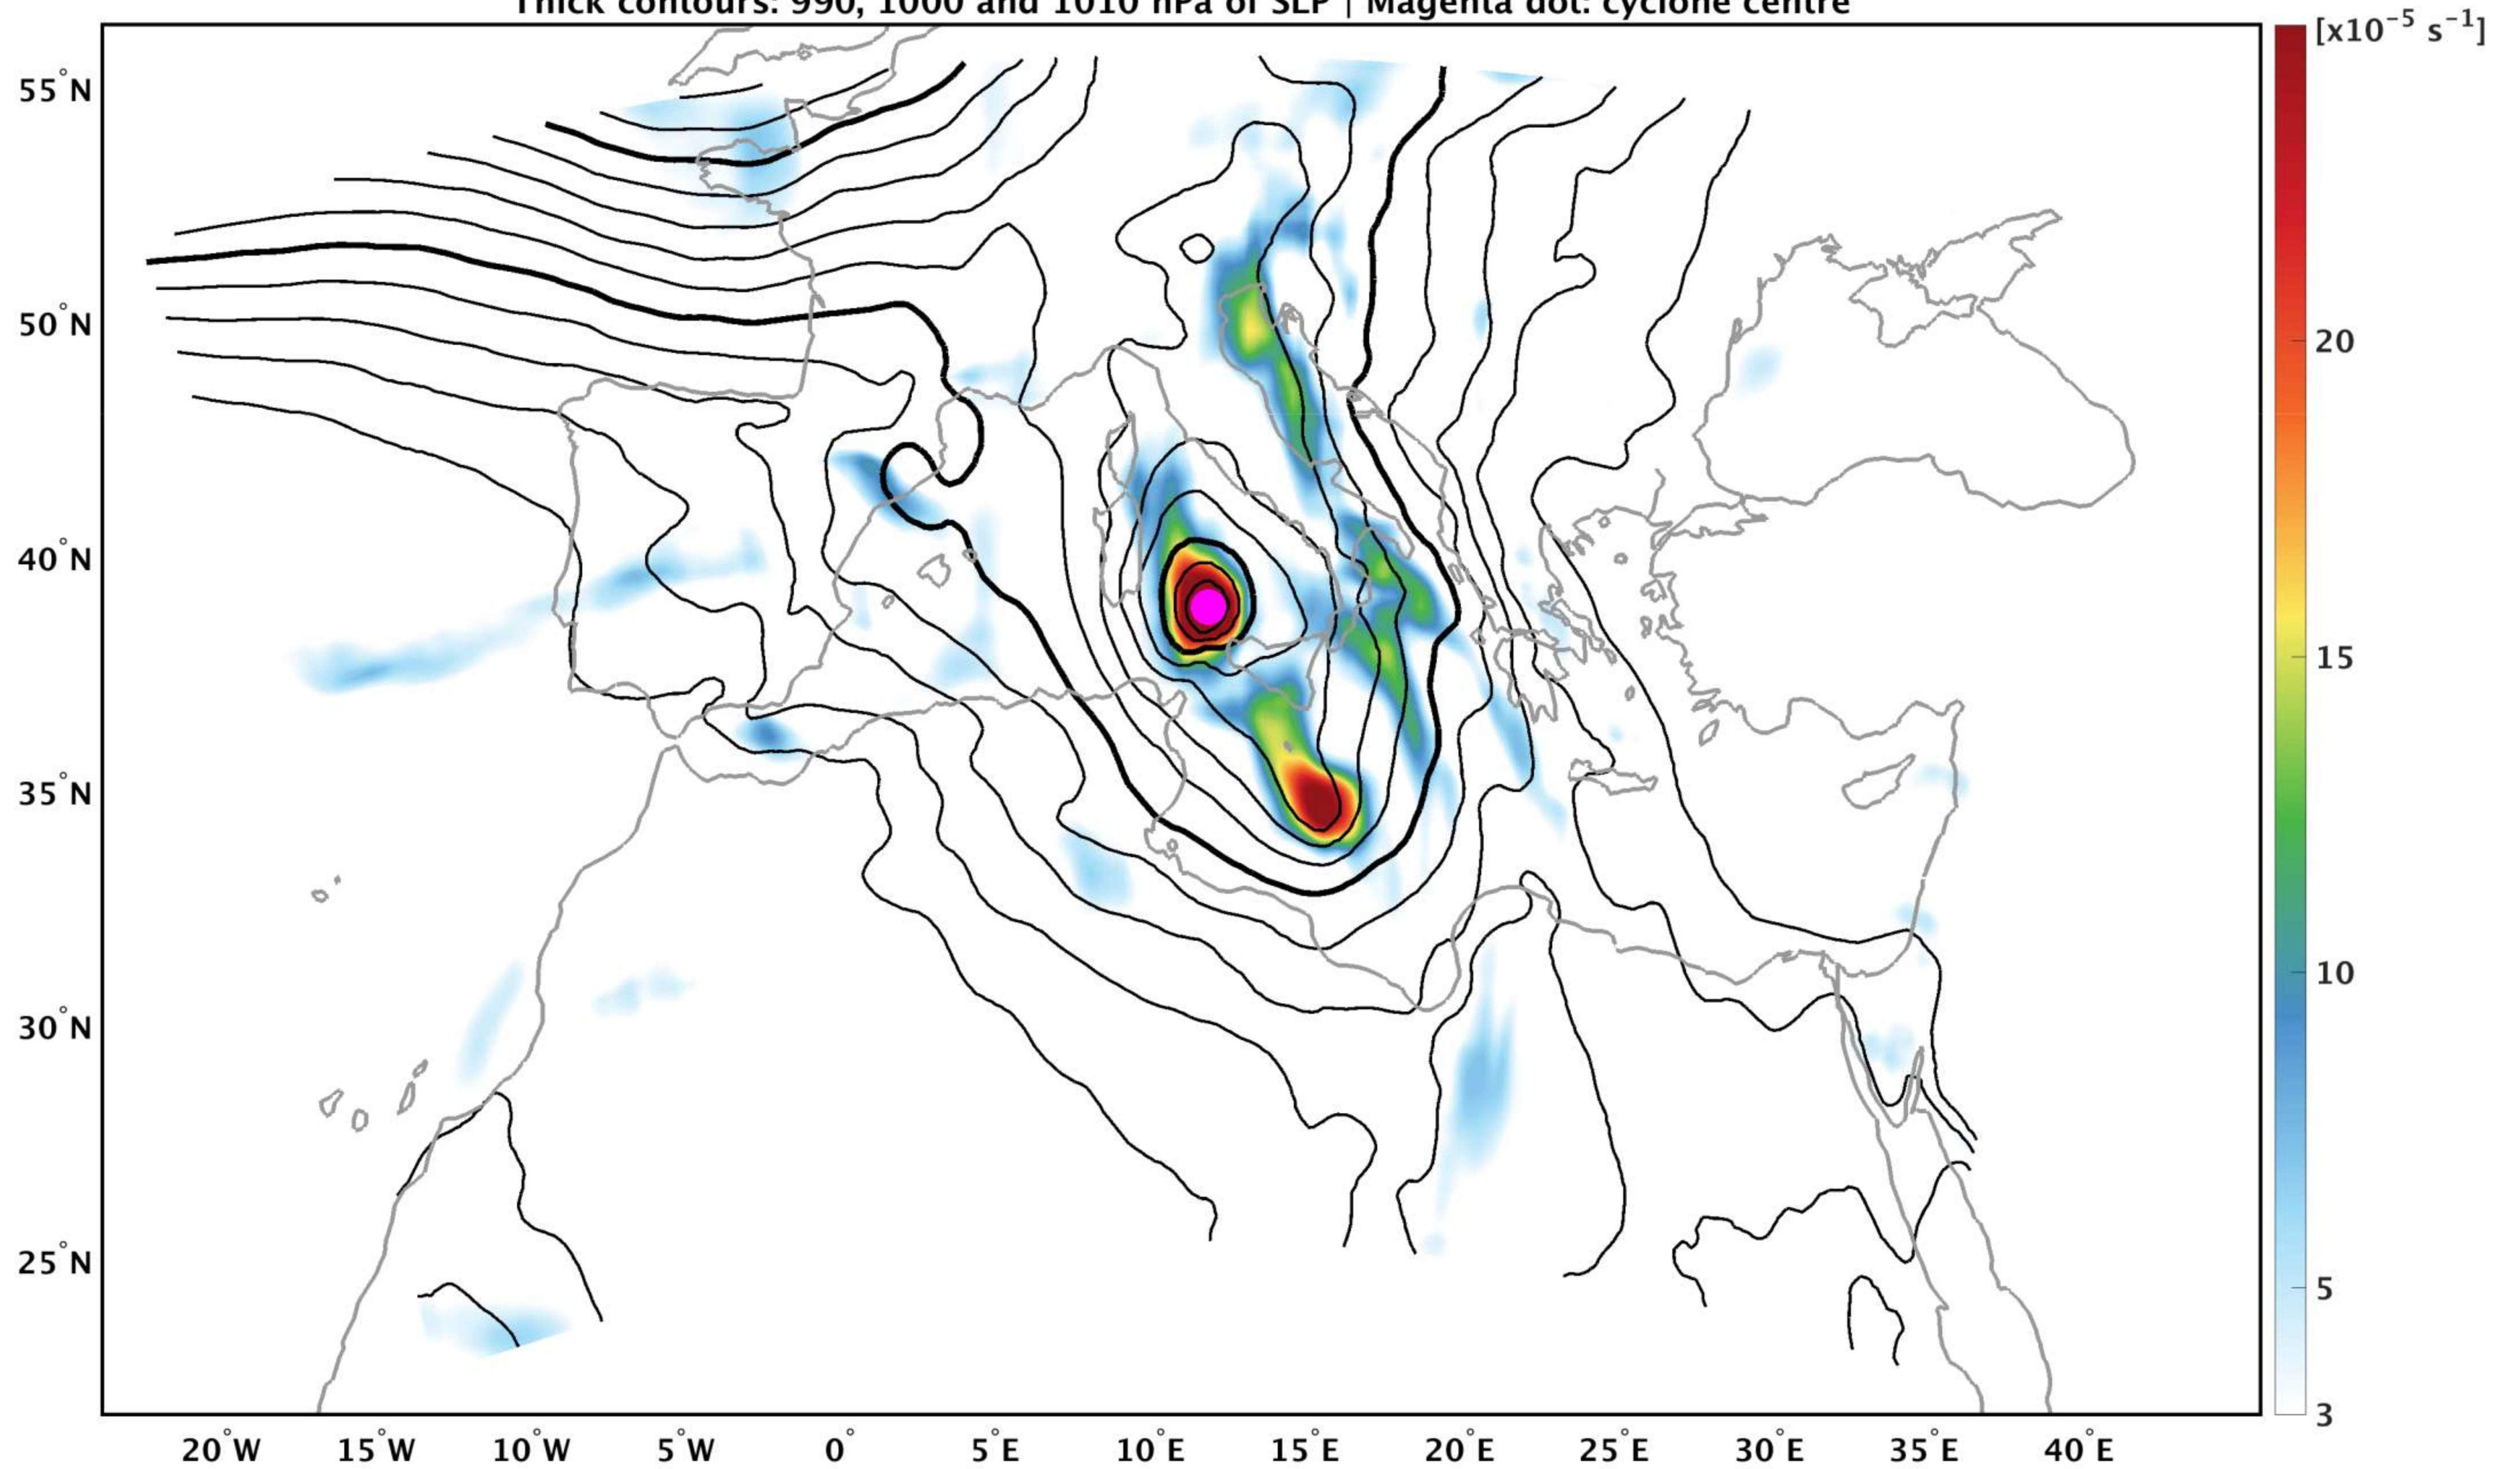



Case-47; Date: 9/2/2017

Colour: Relative vorticity ( $\times 10^{-5}$ ) | Contour: SLP (from 1018 hPa with an interval of 2 hPa)

Thick contours: 990, 1000 and 1010 hPa of SLP | Magenta dot: cyclone centre

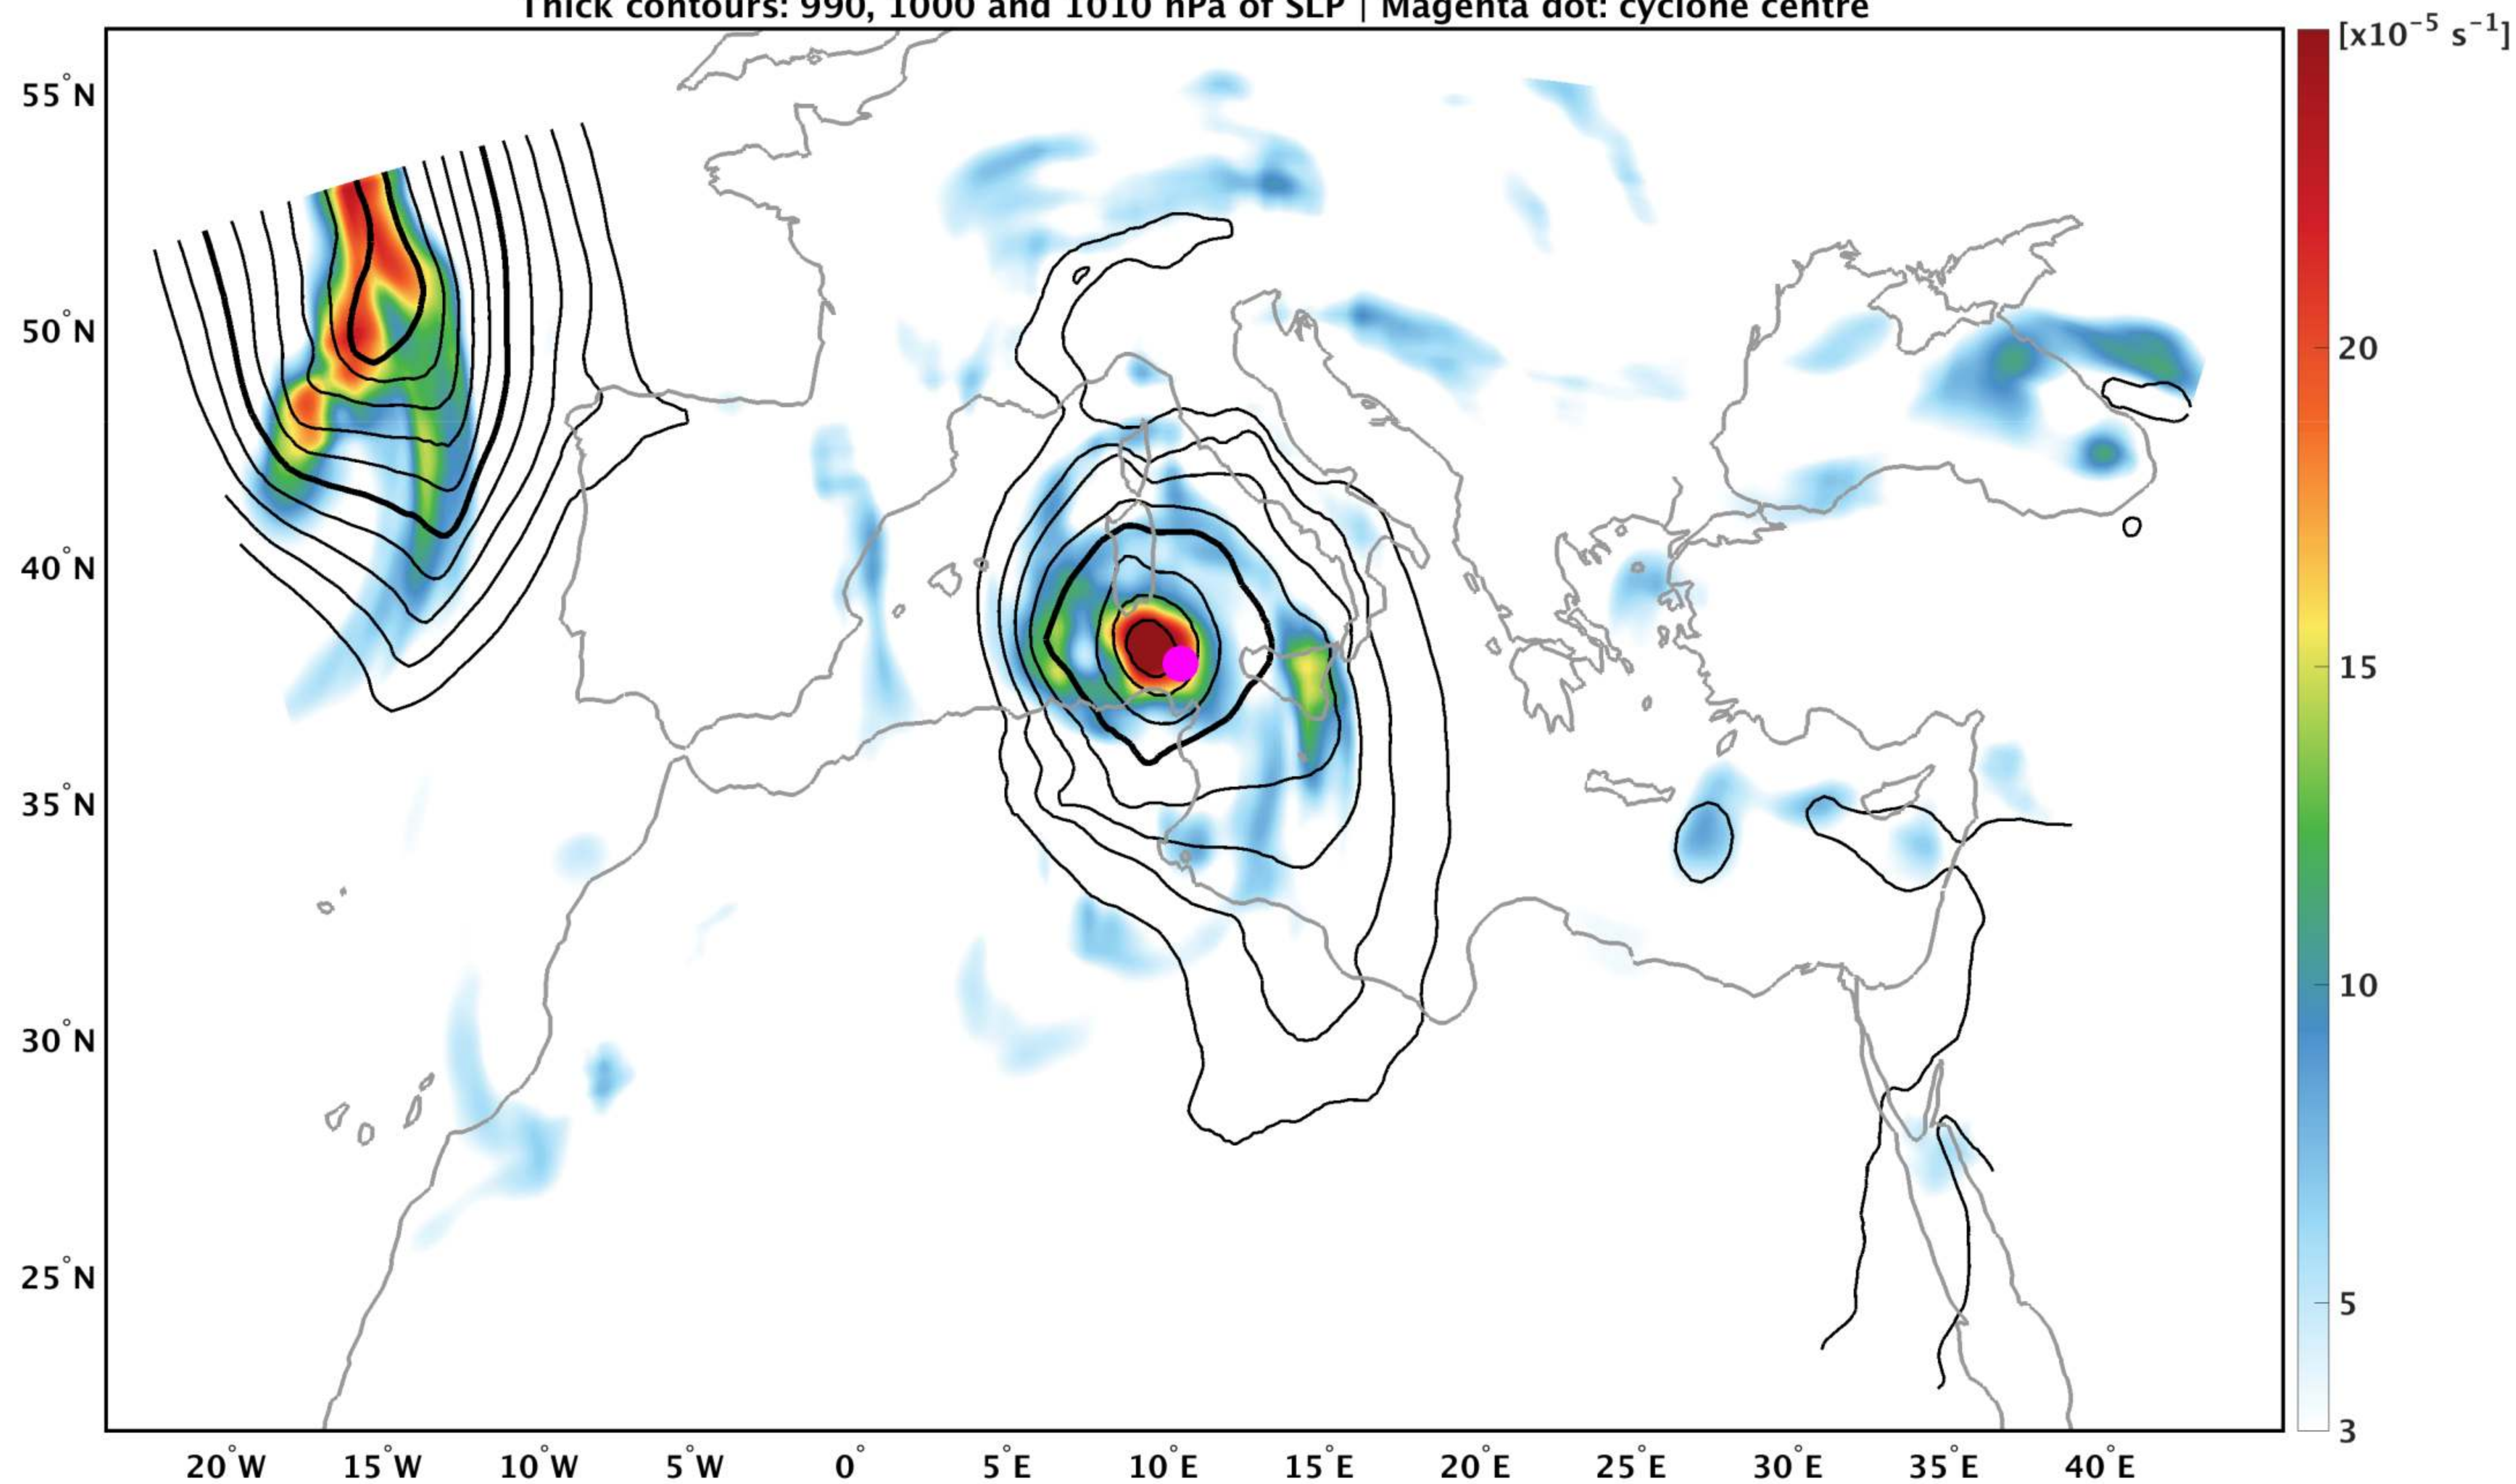



Case-48; Date: 16/12/2008

Colour: Relative vorticity ( $\times 10^{-5}$ ) | Contour: SLP (from 1018 hPa with an interval of 2 hPa)

Thick contours: 990, 1000 and 1010 hPa of SLP | Magenta dot: cyclone centre

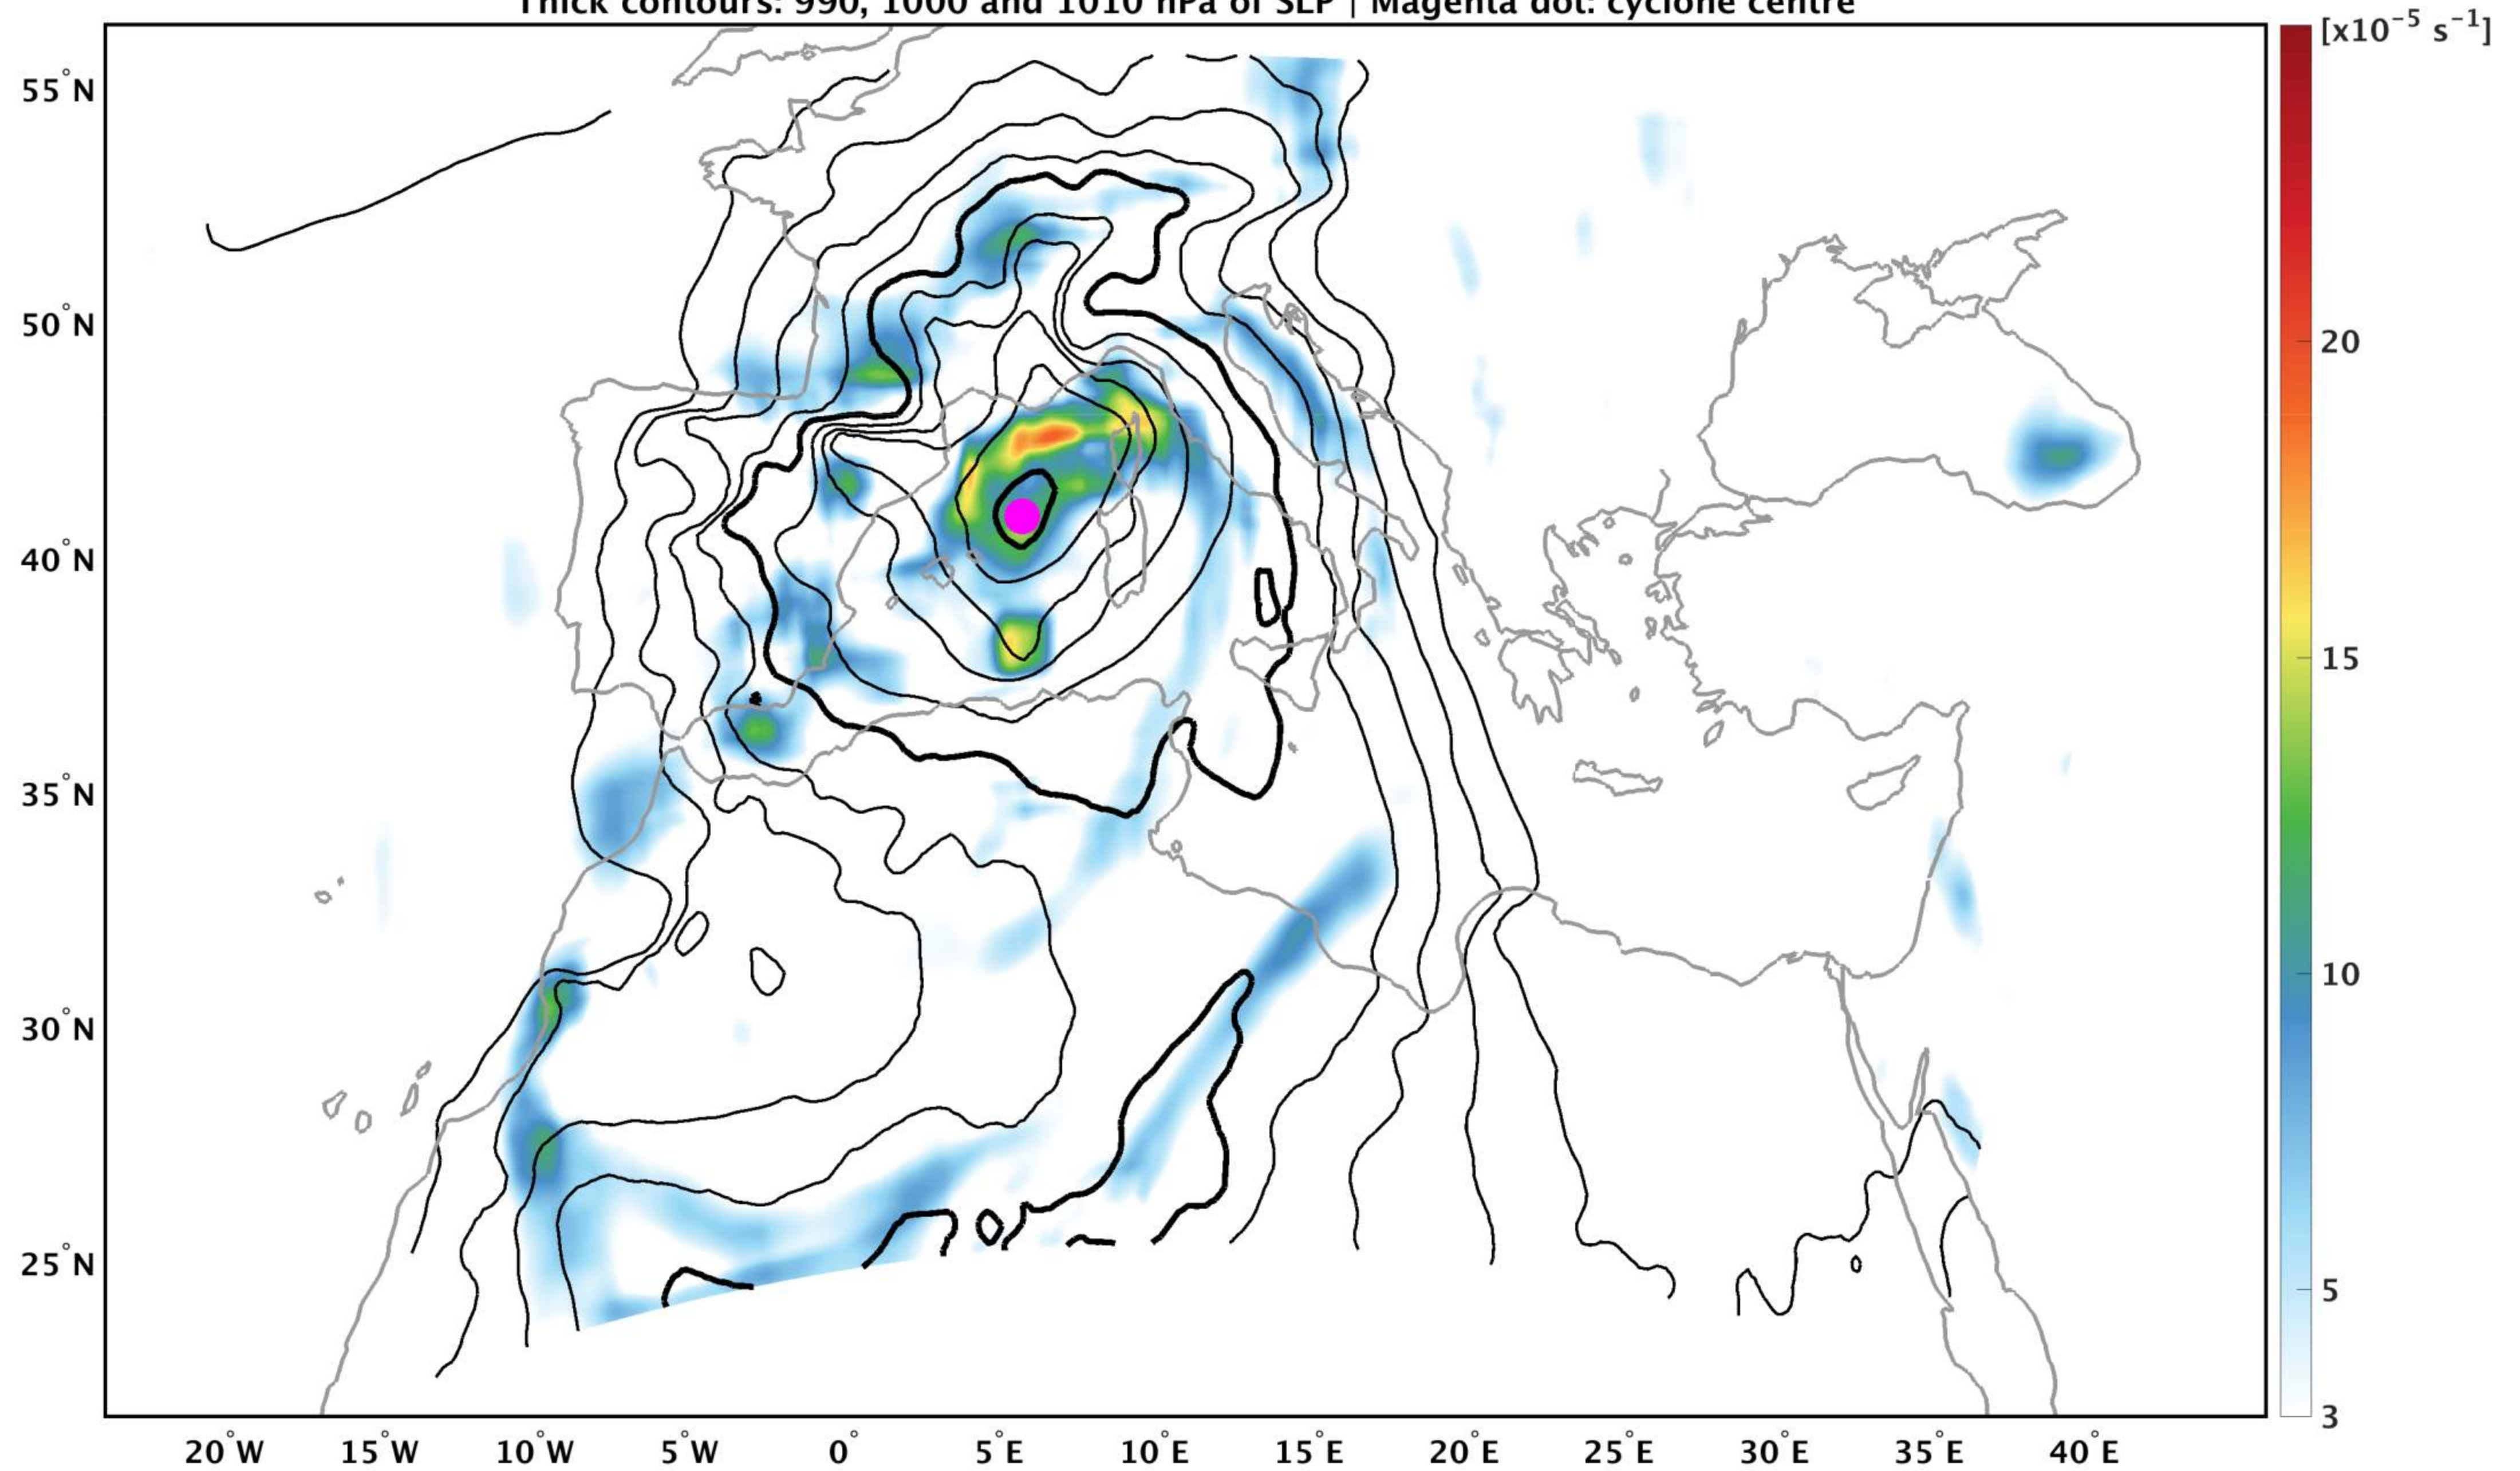



Case-49; Date: 24/2/2011

Colour: Relative vorticity ( $\times 10^{-5}$ ) | Contour: SLP (from 1018 hPa with an interval of 2 hPa)

Thick contours: 990, 1000 and 1010 hPa of SLP | Magenta dot: cyclone centre

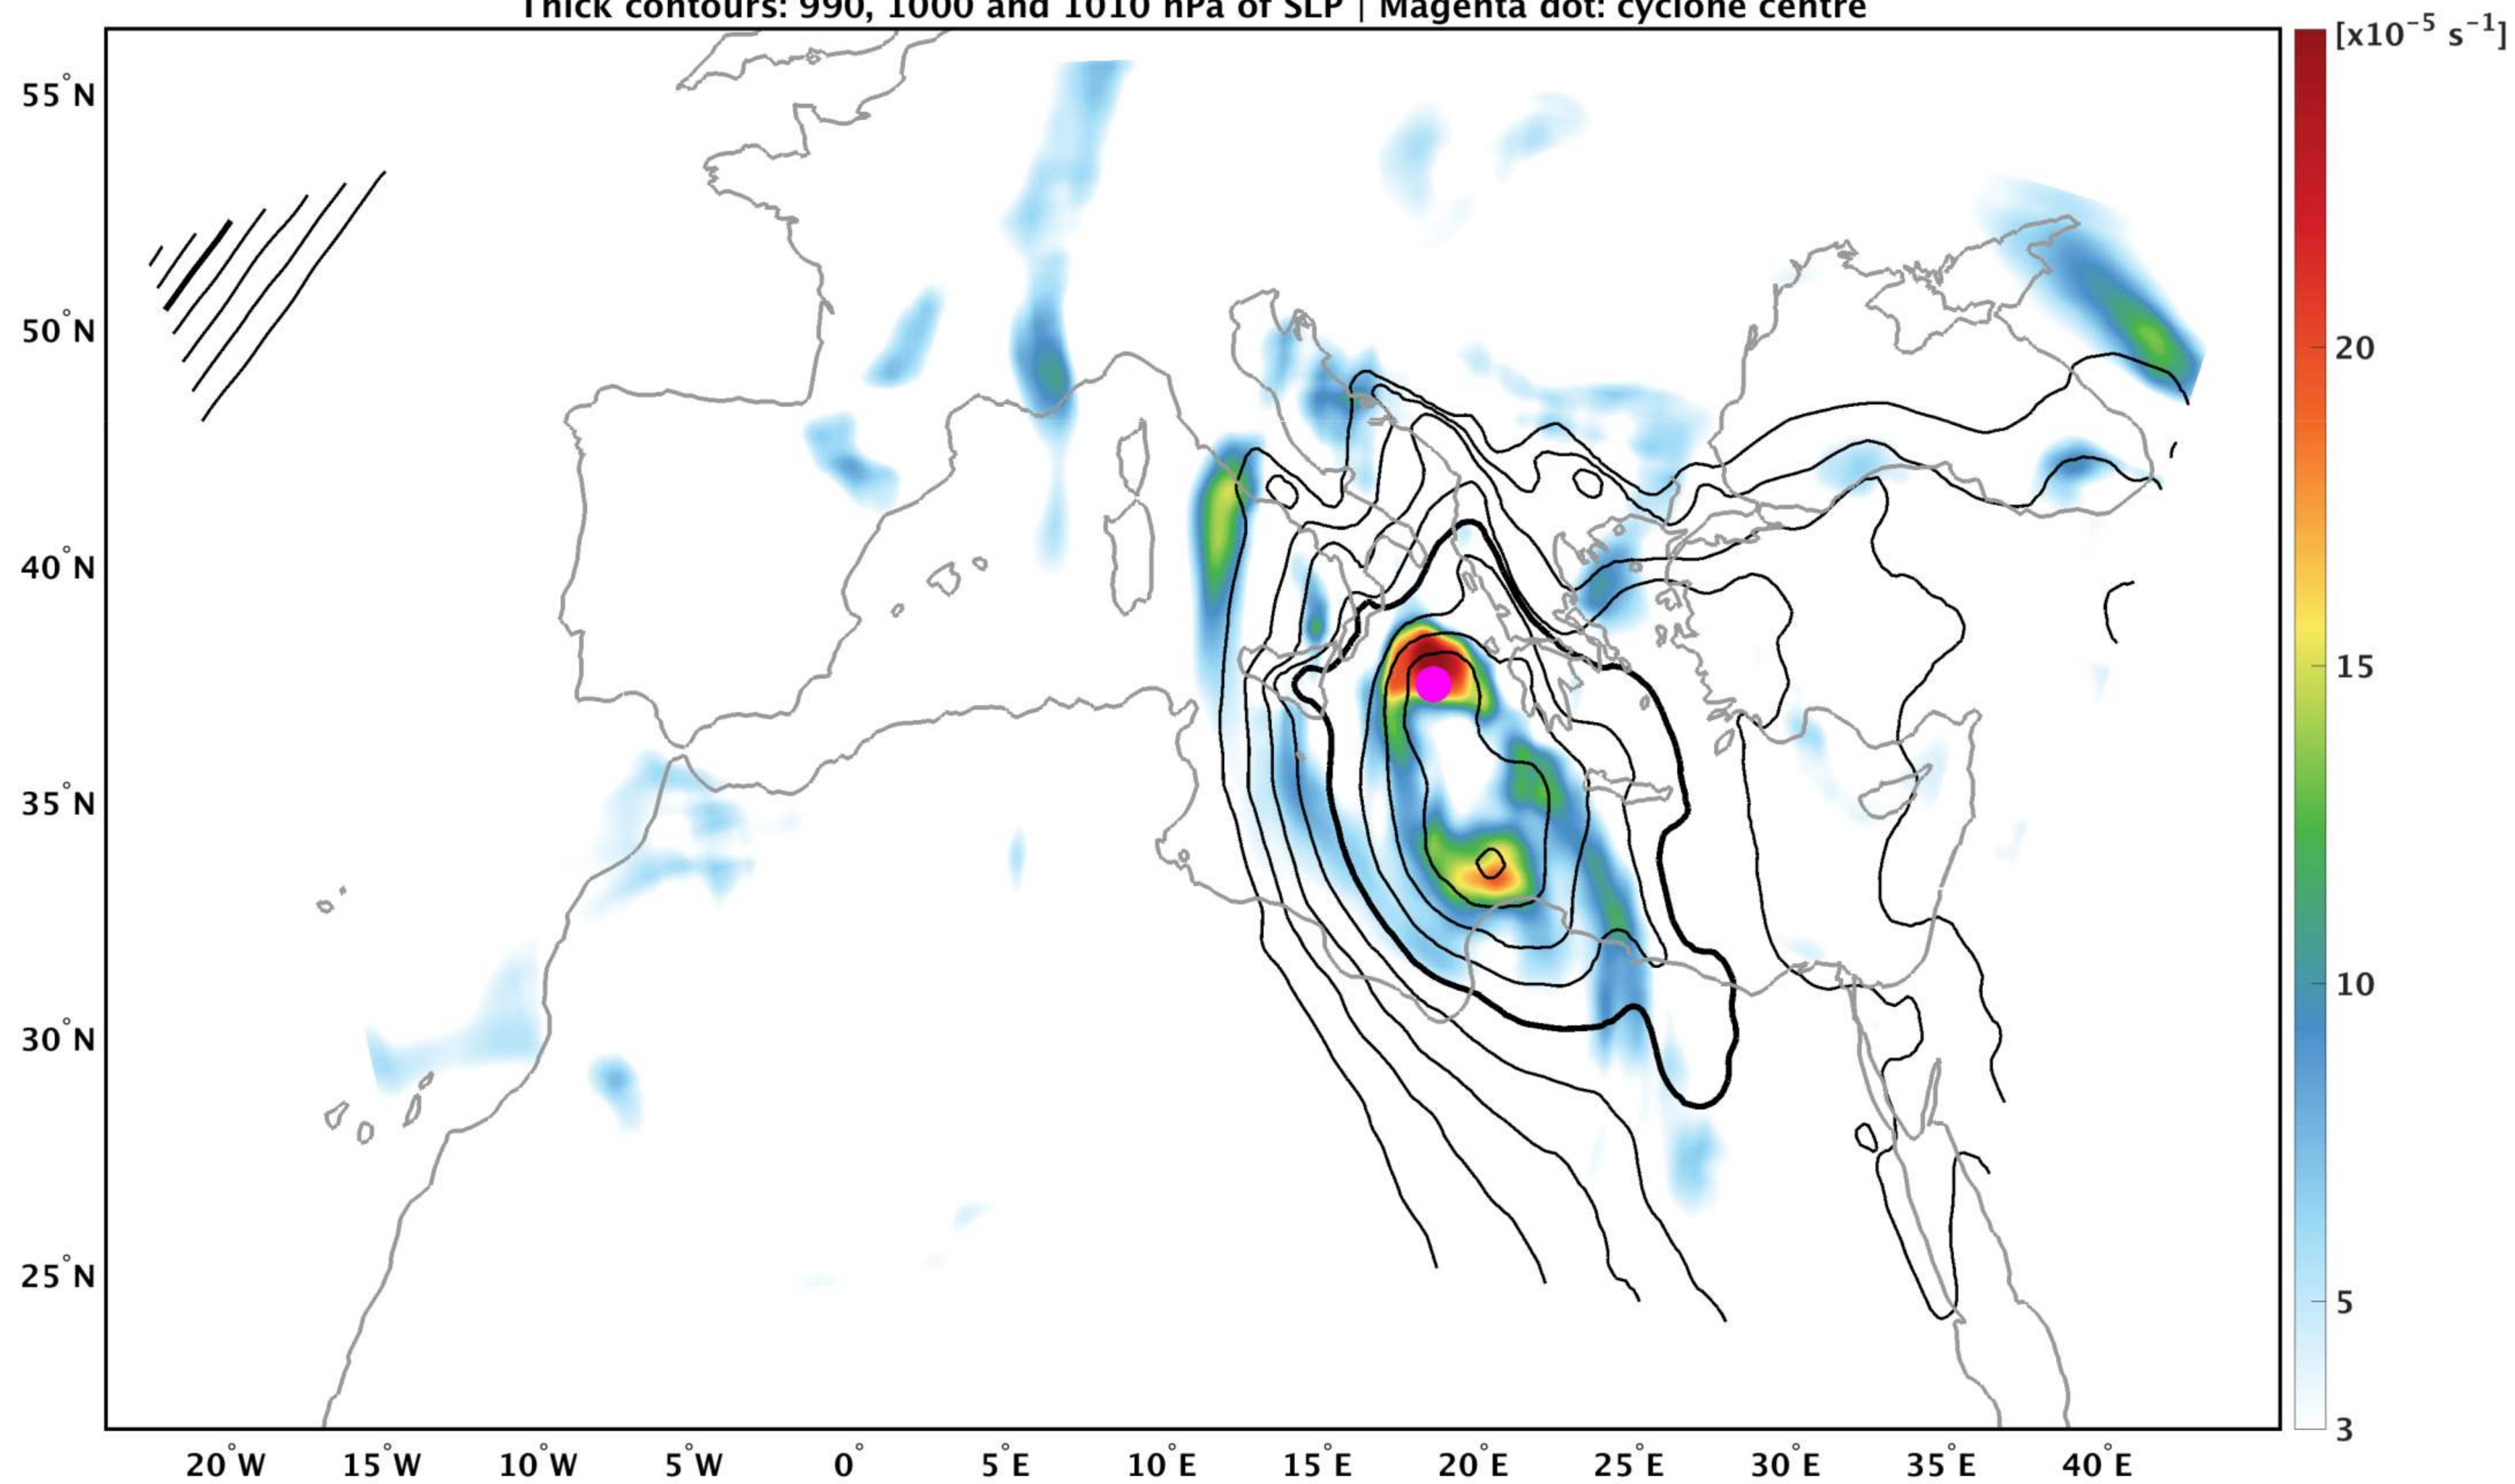



Case-50; Date: 20/2/2013

Colour: Relative vorticity ( $\times 10^{-5}$ ) | Contour: SLP (from 1018 hPa with an interval of 2 hPa)

Thick contours: 990, 1000 and 1010 hPa of SLP | Magenta dot: cyclone centre

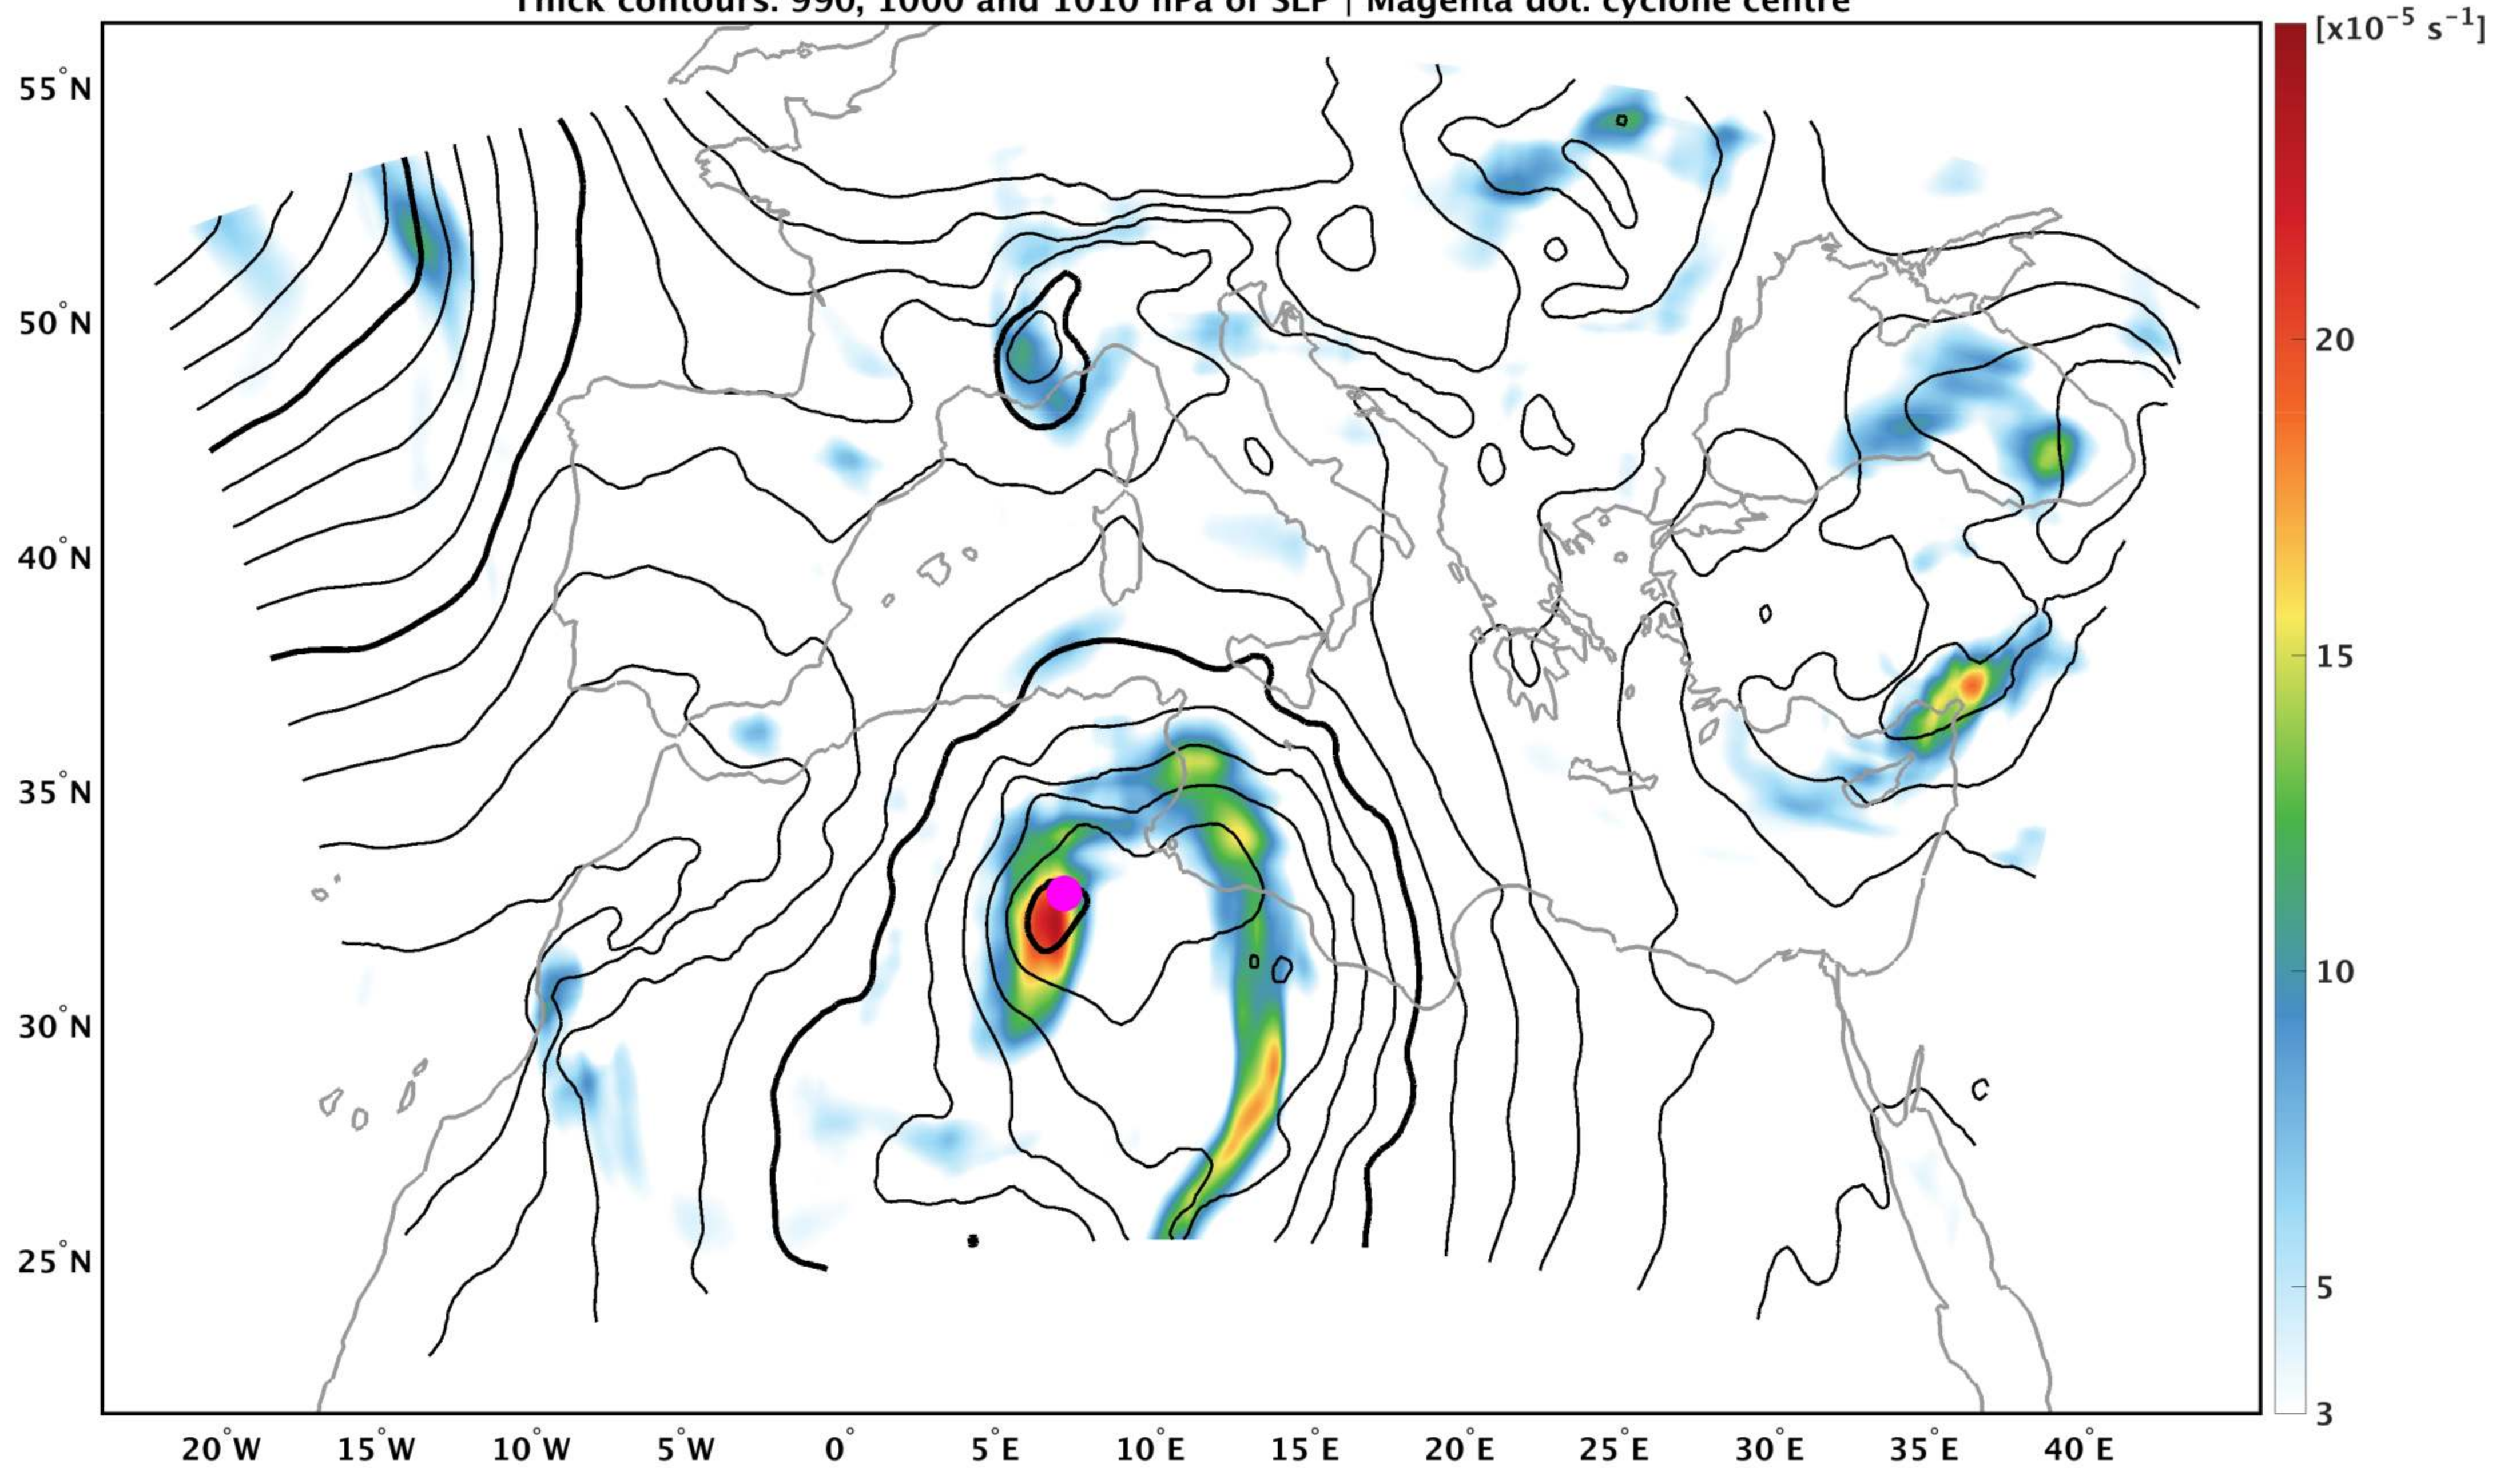



Case-51; Date: 23/1/2013

Colour: Relative vorticity ( $\times 10^{-5}$ ) | Contour: SLP (from 1018 hPa with an interval of 2 hPa)

Thick contours: 990, 1000 and 1010 hPa of SLP | Magenta dot: cyclone centre

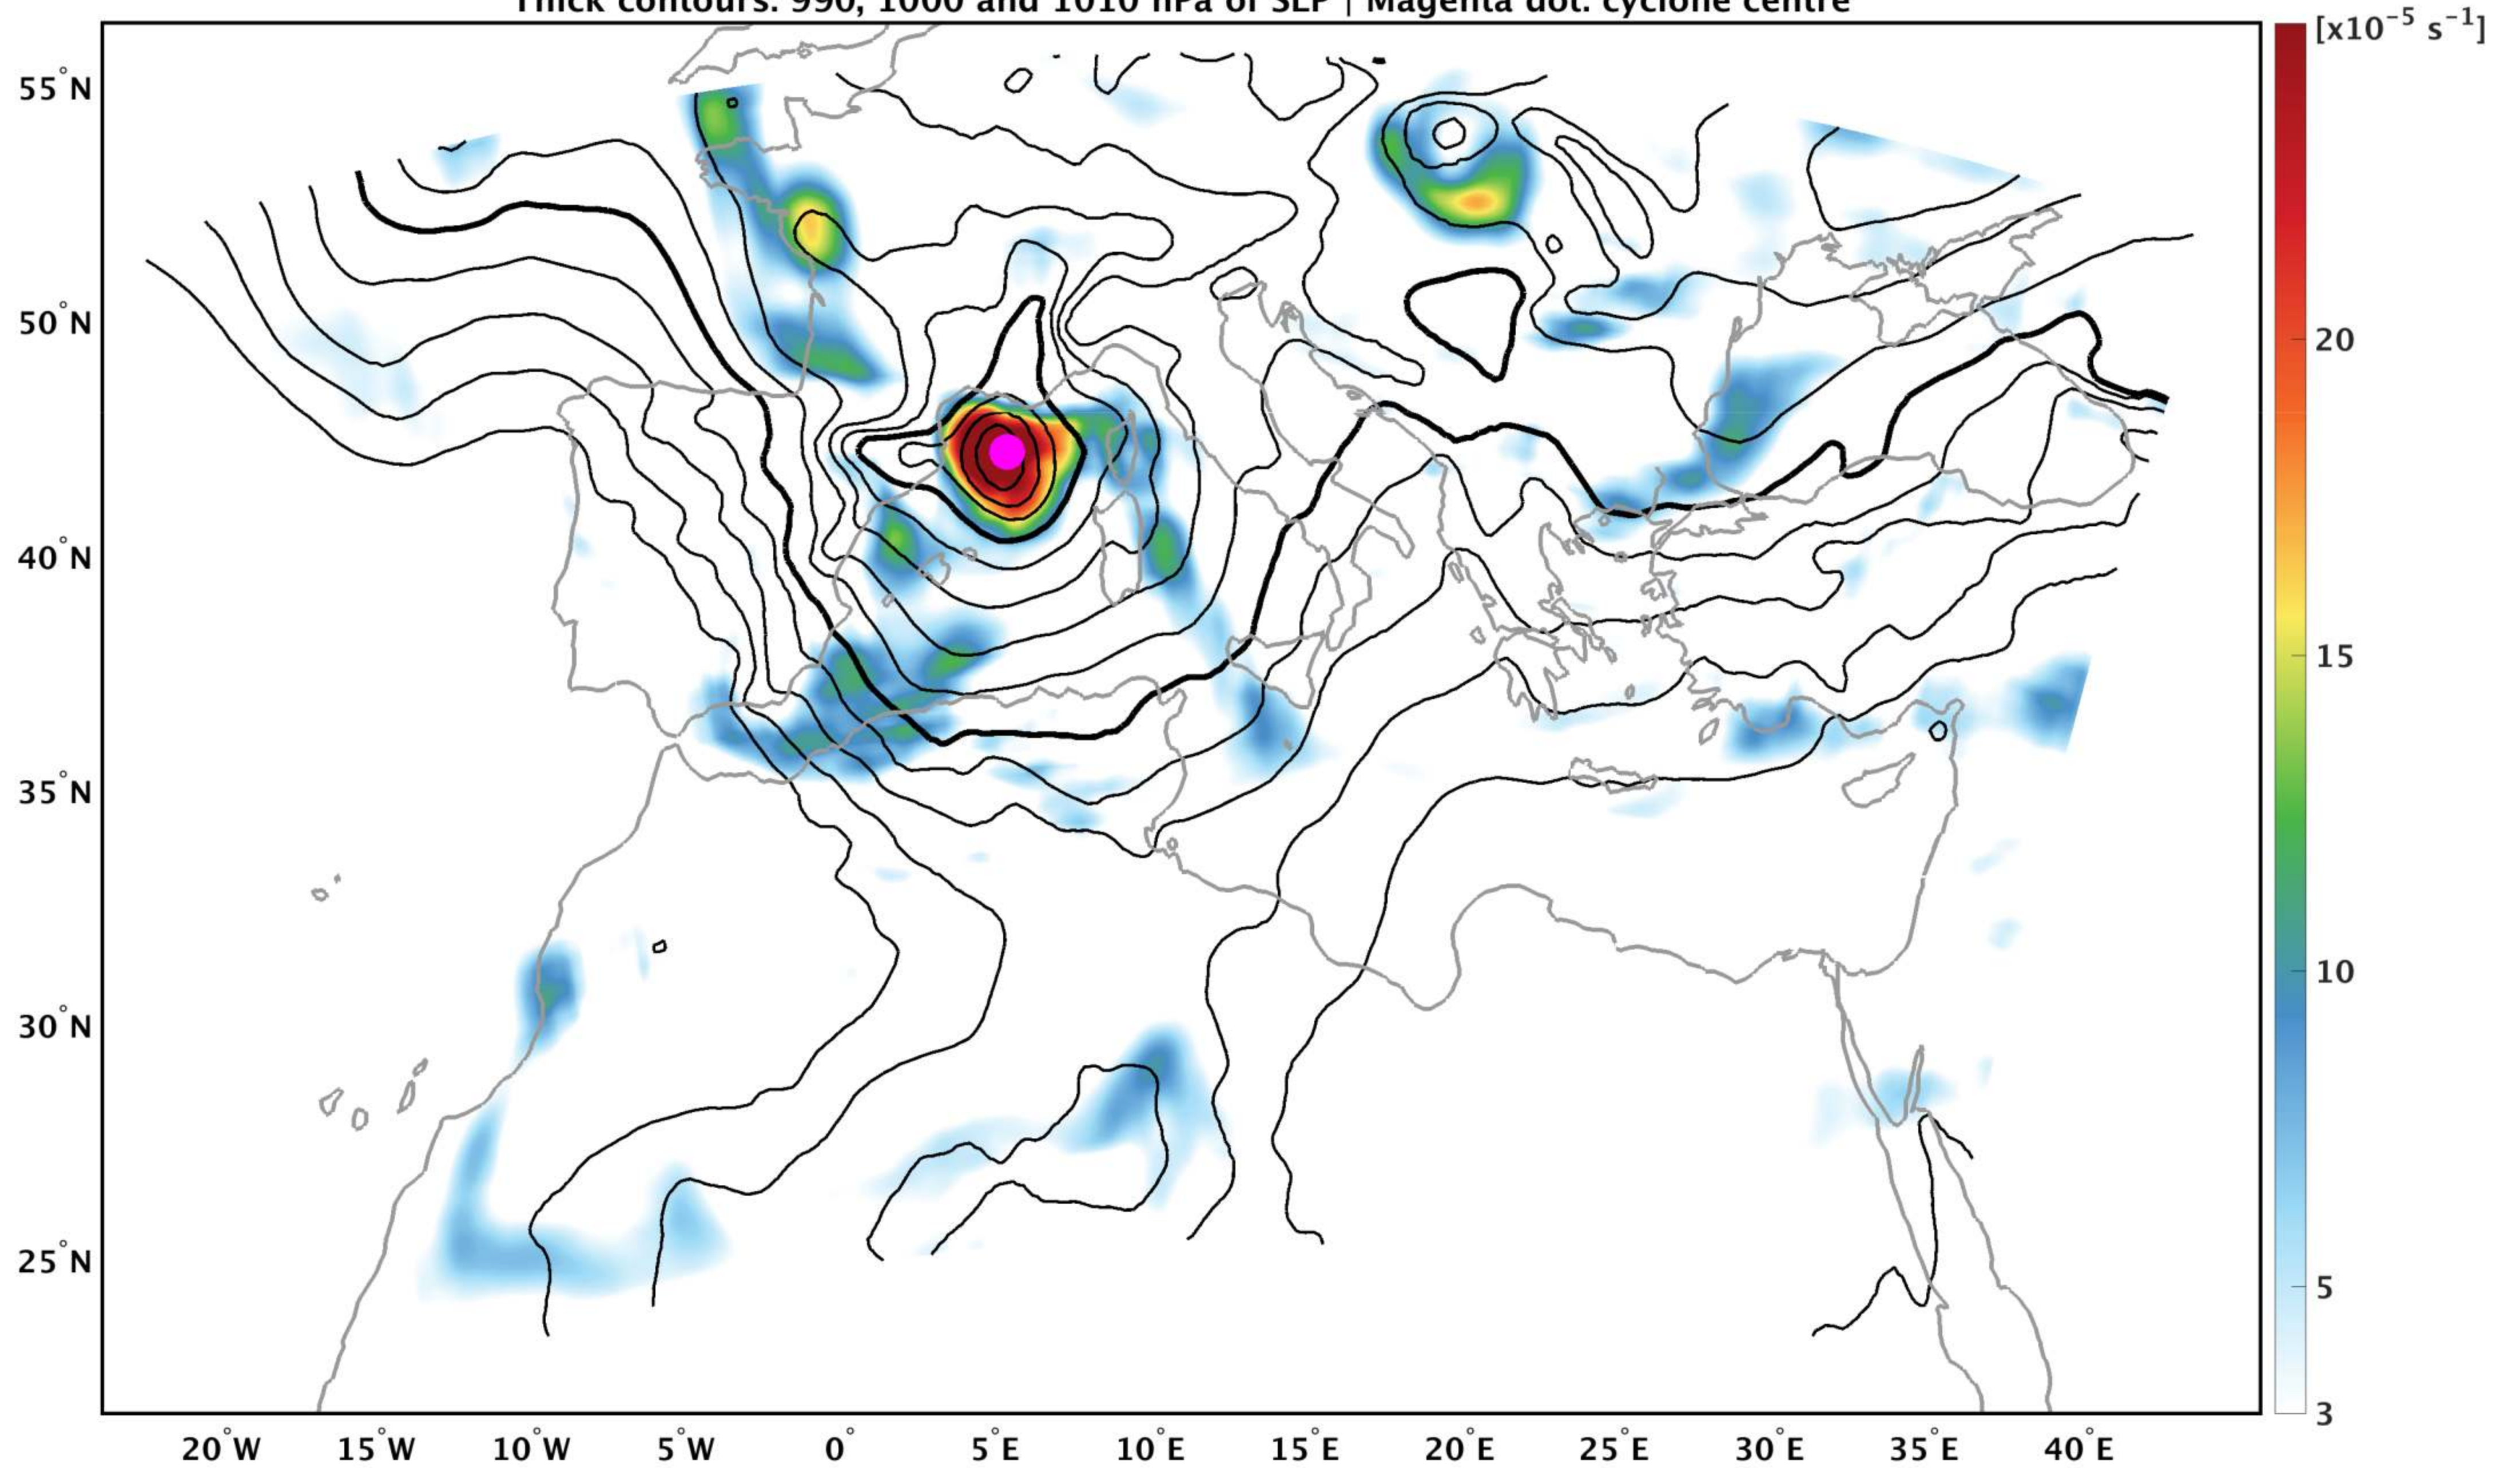



Case-52; Date: 25/10/2010

Colour: Relative vorticity ( $\times 10^{-5}$ ) | Contour: SLP (from 1018 hPa with an interval of 2 hPa)

Thick contours: 990, 1000 and 1010 hPa of SLP | Magenta dot: cyclone centre

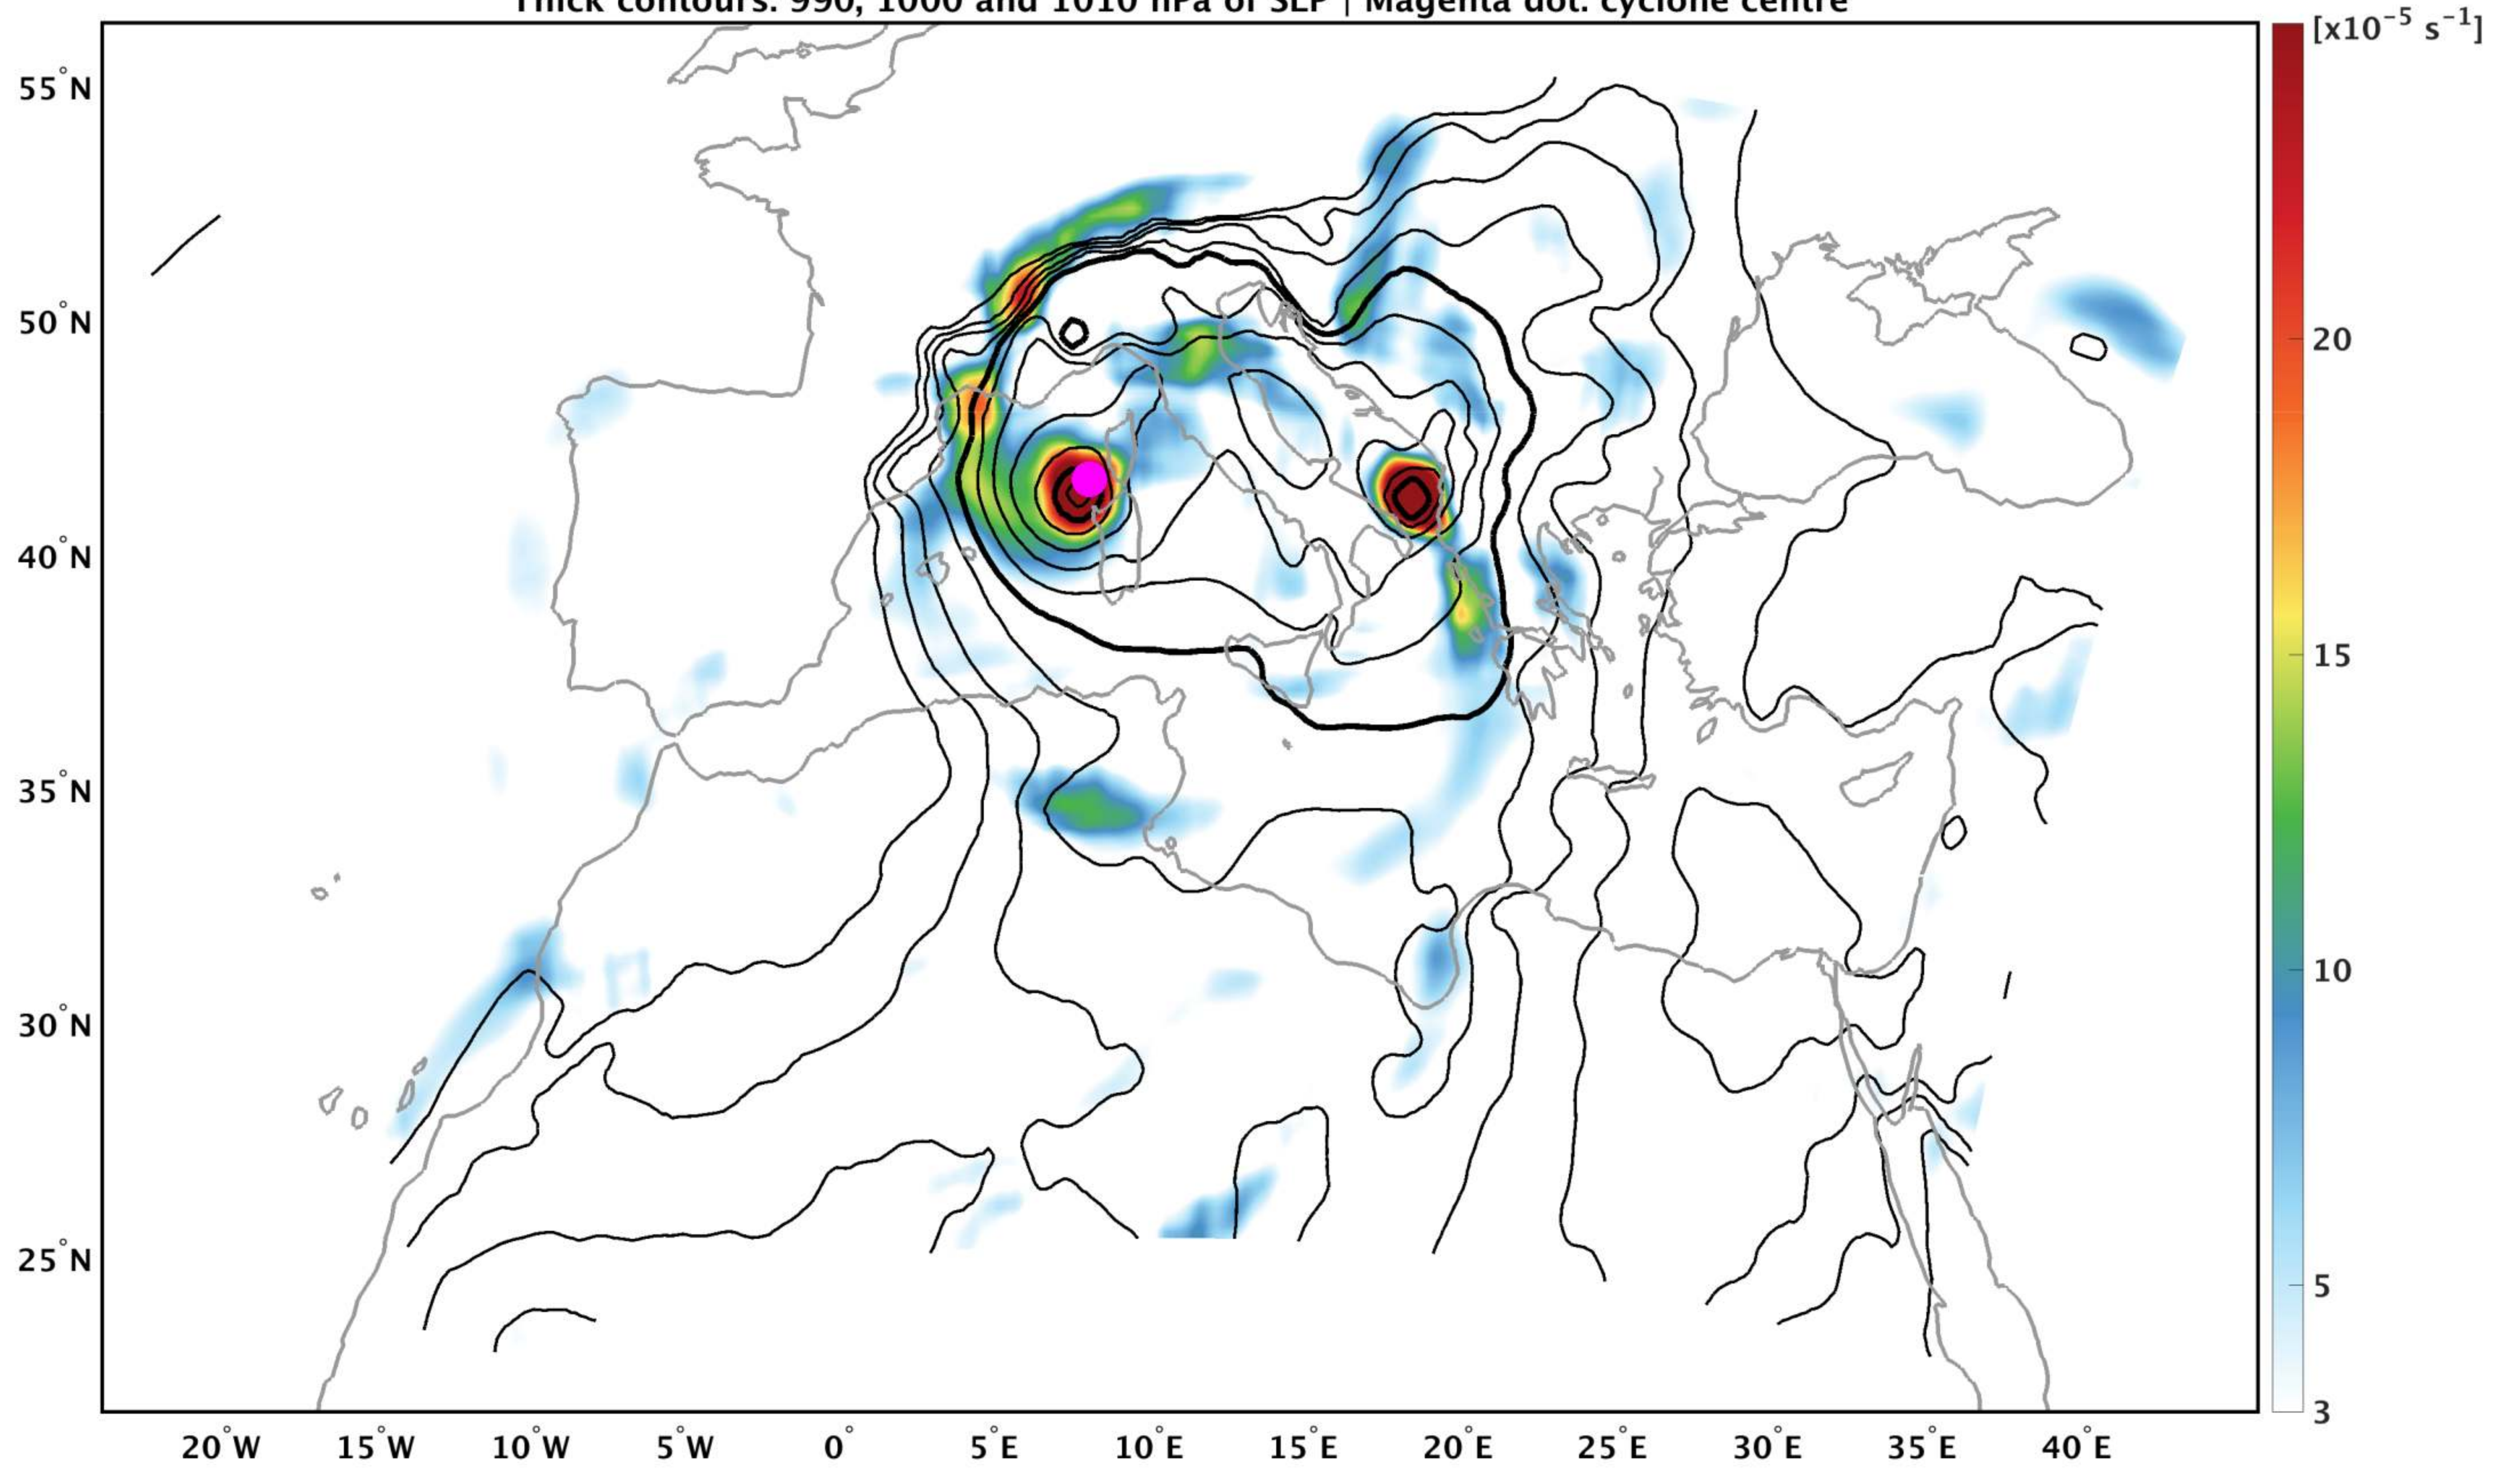



Case-53; Date: 10/12/2009

Colour: Relative vorticity ( $\times 10^{-5}$ ) | Contour: SLP (from 1018 hPa with an interval of 2 hPa)

Thick contours: 990, 1000 and 1010 hPa of SLP | Magenta dot: cyclone centre

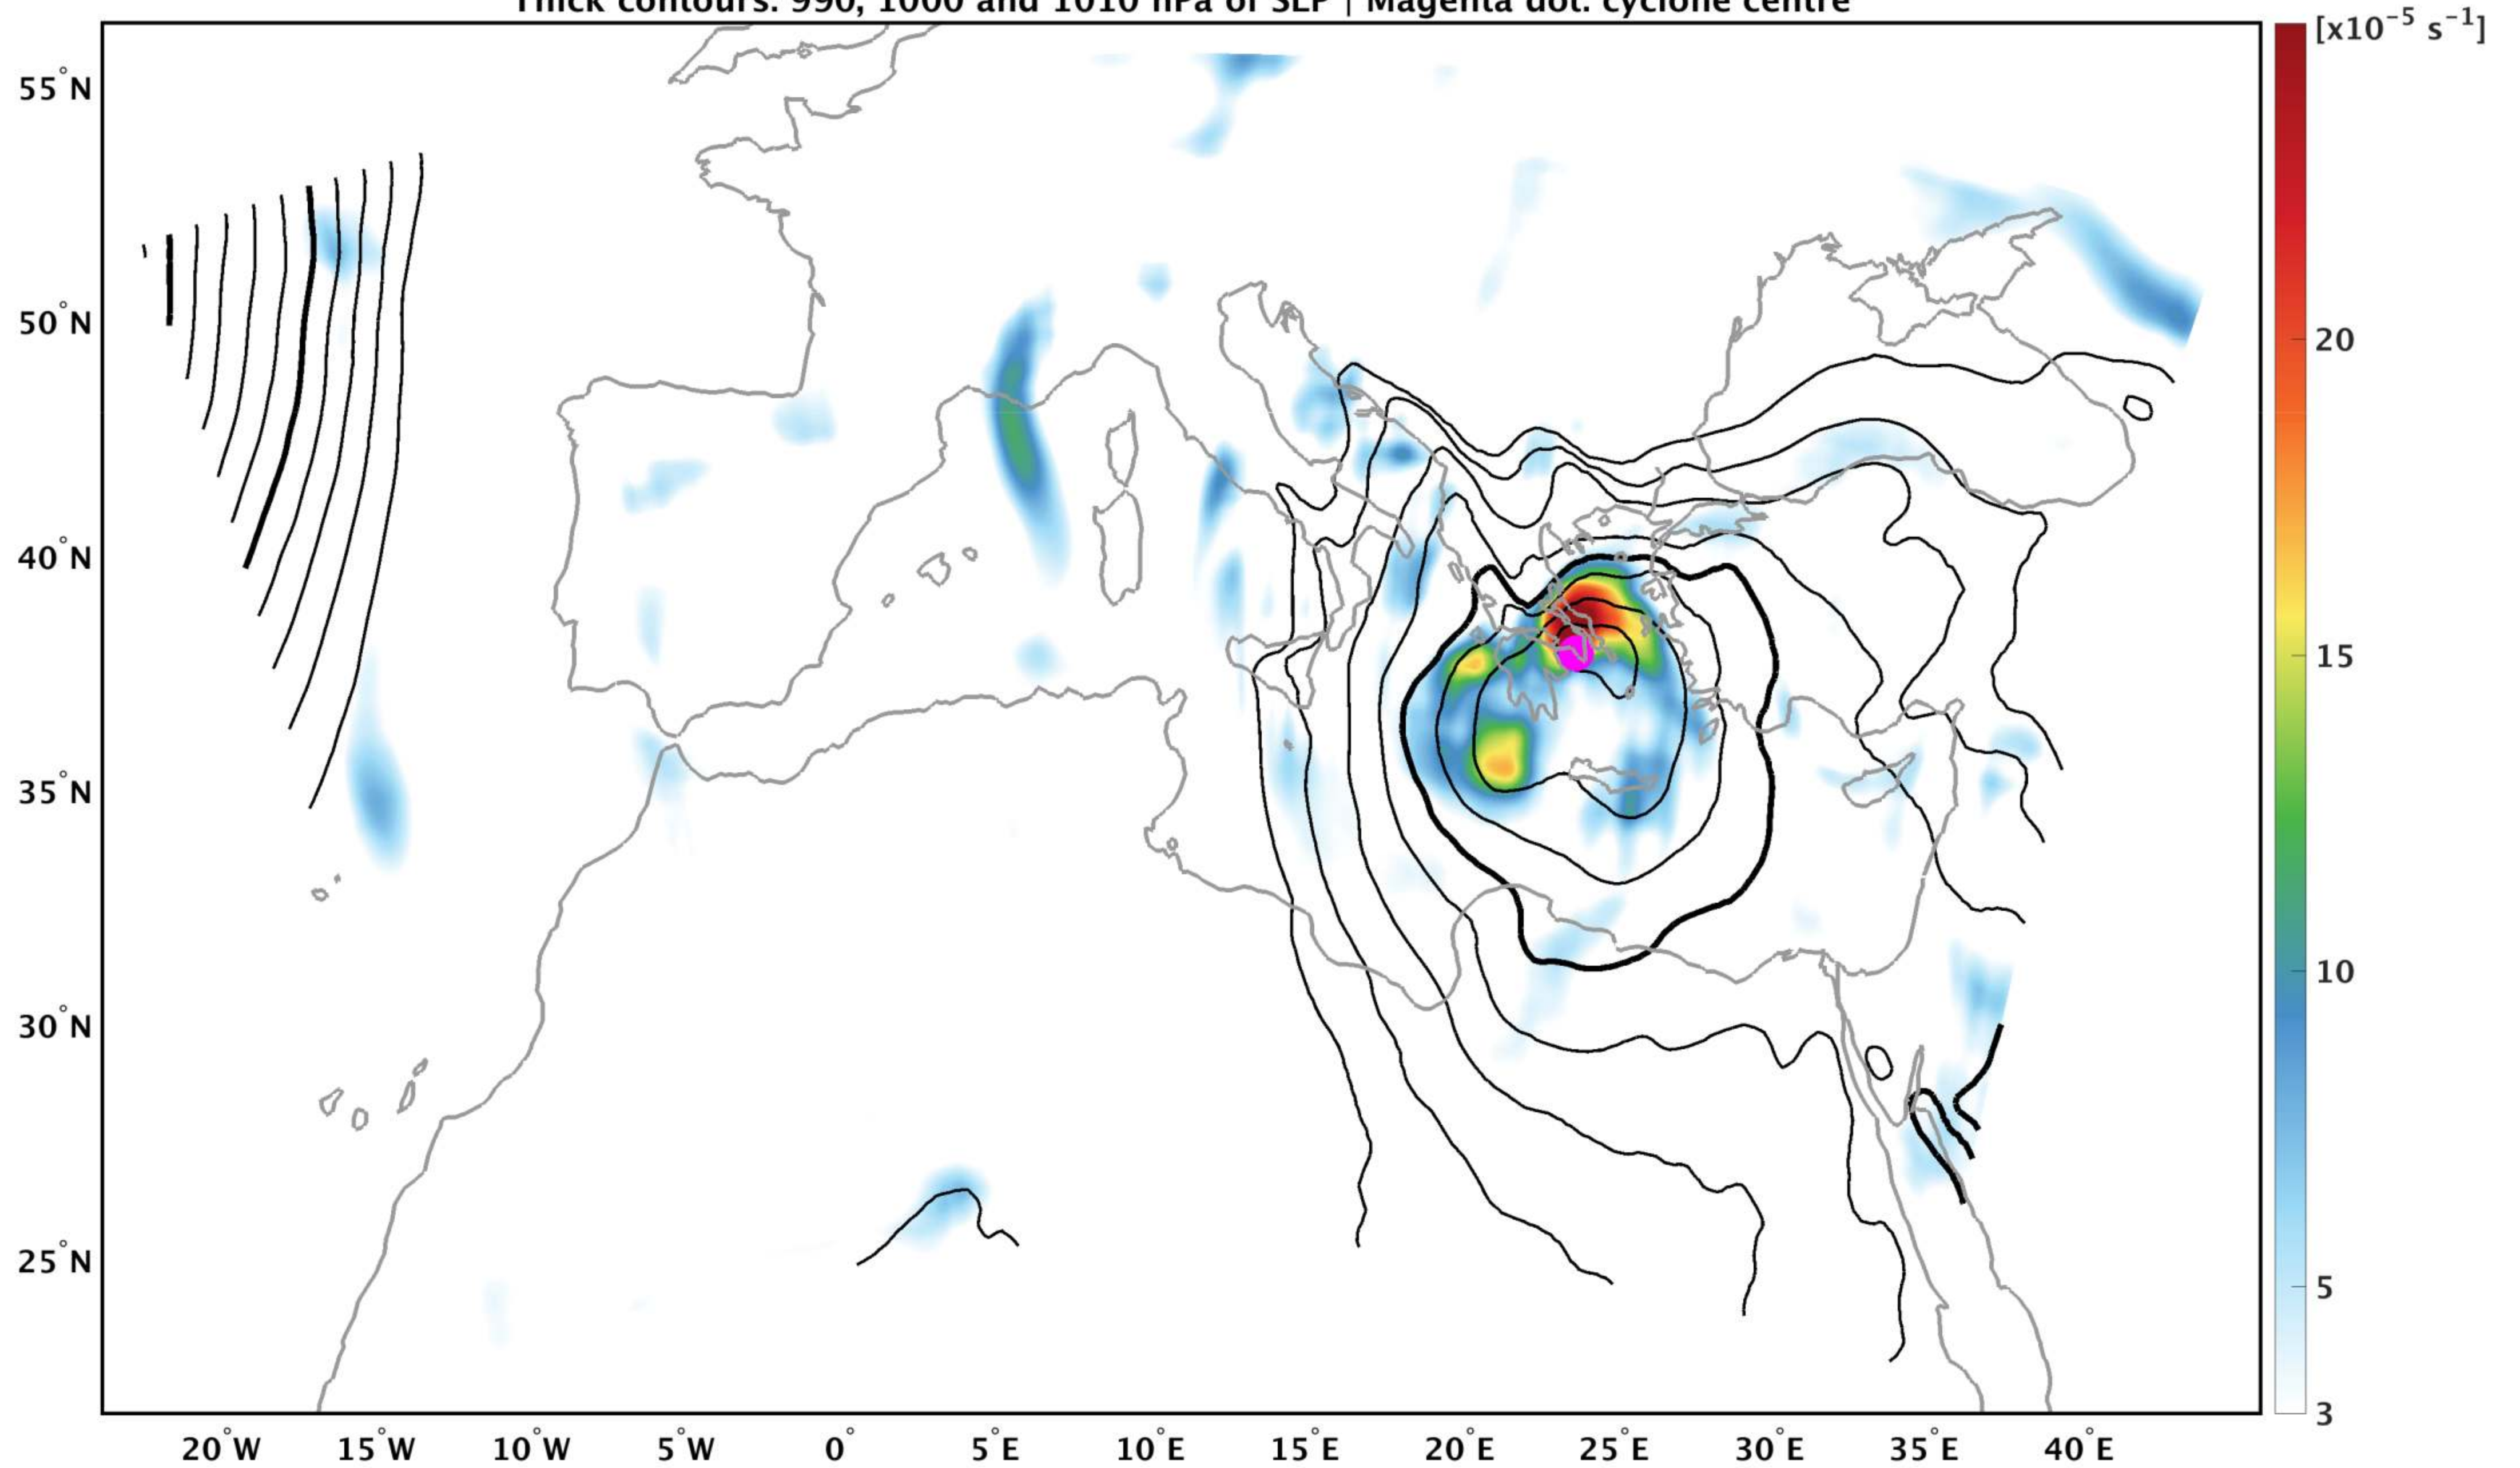



Case-54; Date: 4/6/2014

Colour: Relative vorticity ( $\times 10^{-5}$ ) | Contour: SLP (from 1018 hPa with an interval of 2 hPa)

Thick contours: 990, 1000 and 1010 hPa of SLP | Magenta dot: cyclone centre

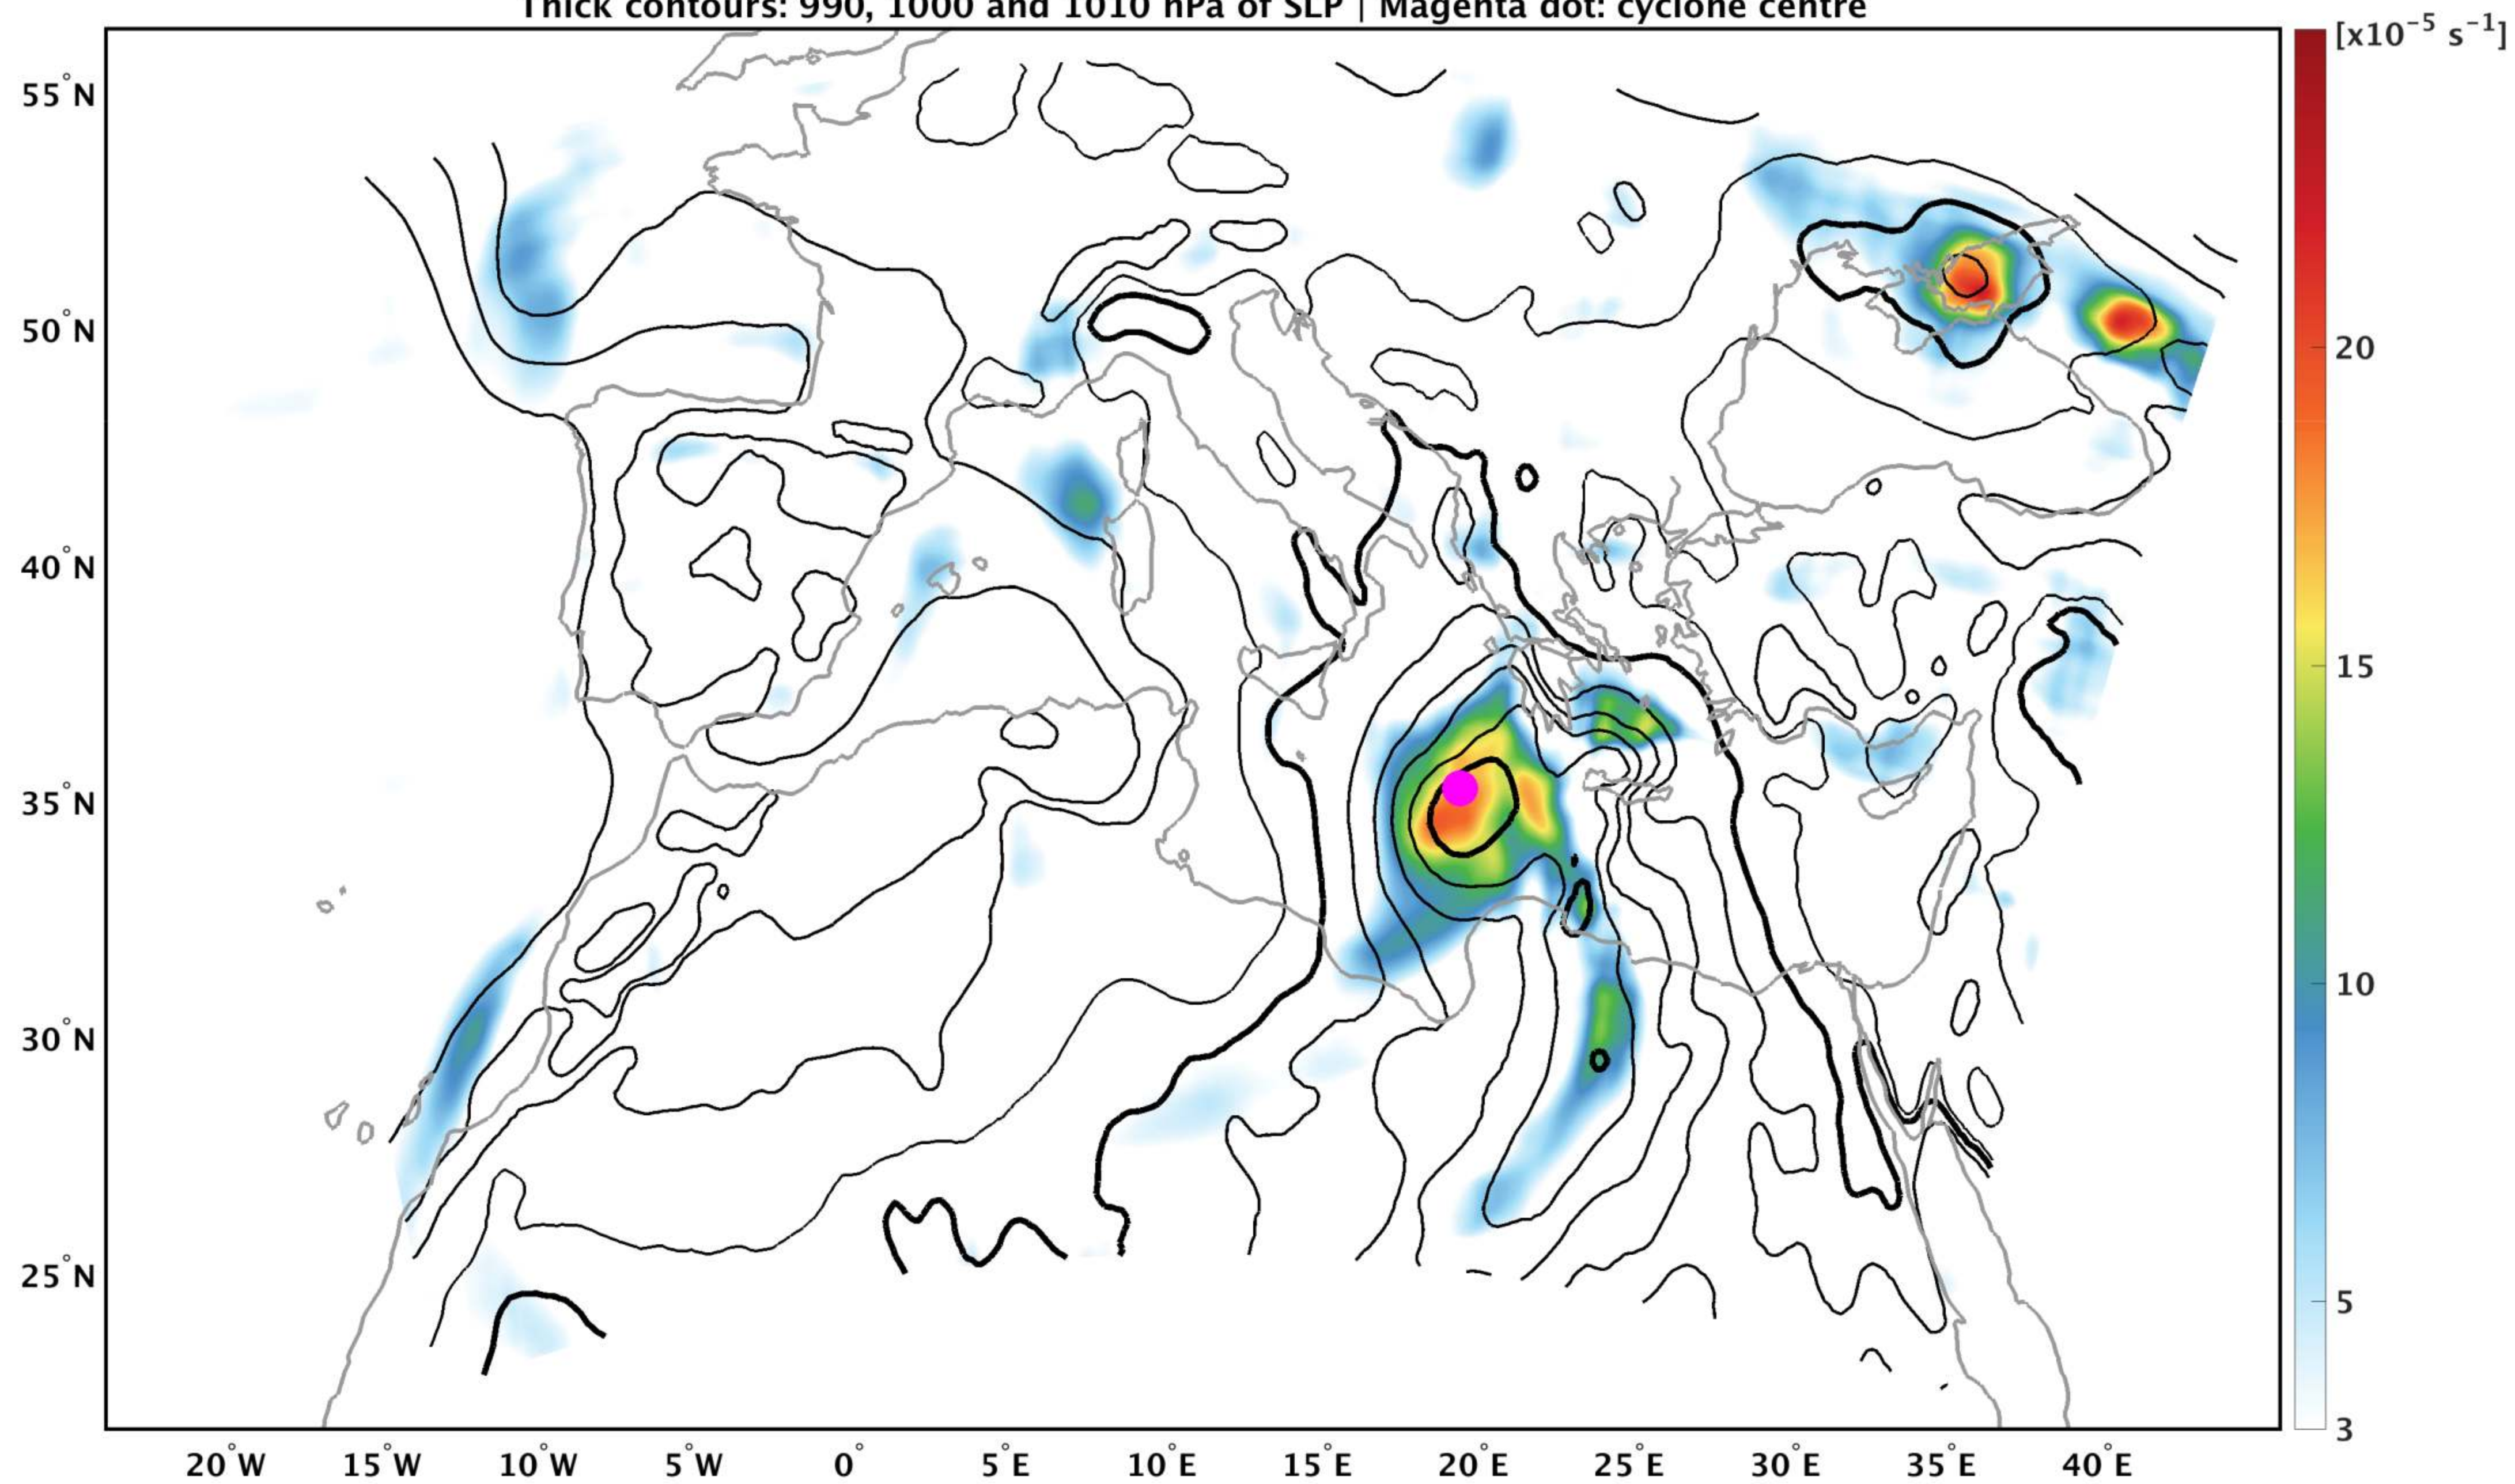



Case-55; Date: 7/3/2010

Colour: Relative vorticity ( $\times 10^{-5}$ ) | Contour: SLP (from 1018 hPa with an interval of 2 hPa)

Thick contours: 990, 1000 and 1010 hPa of SLP | Magenta dot: cyclone centre

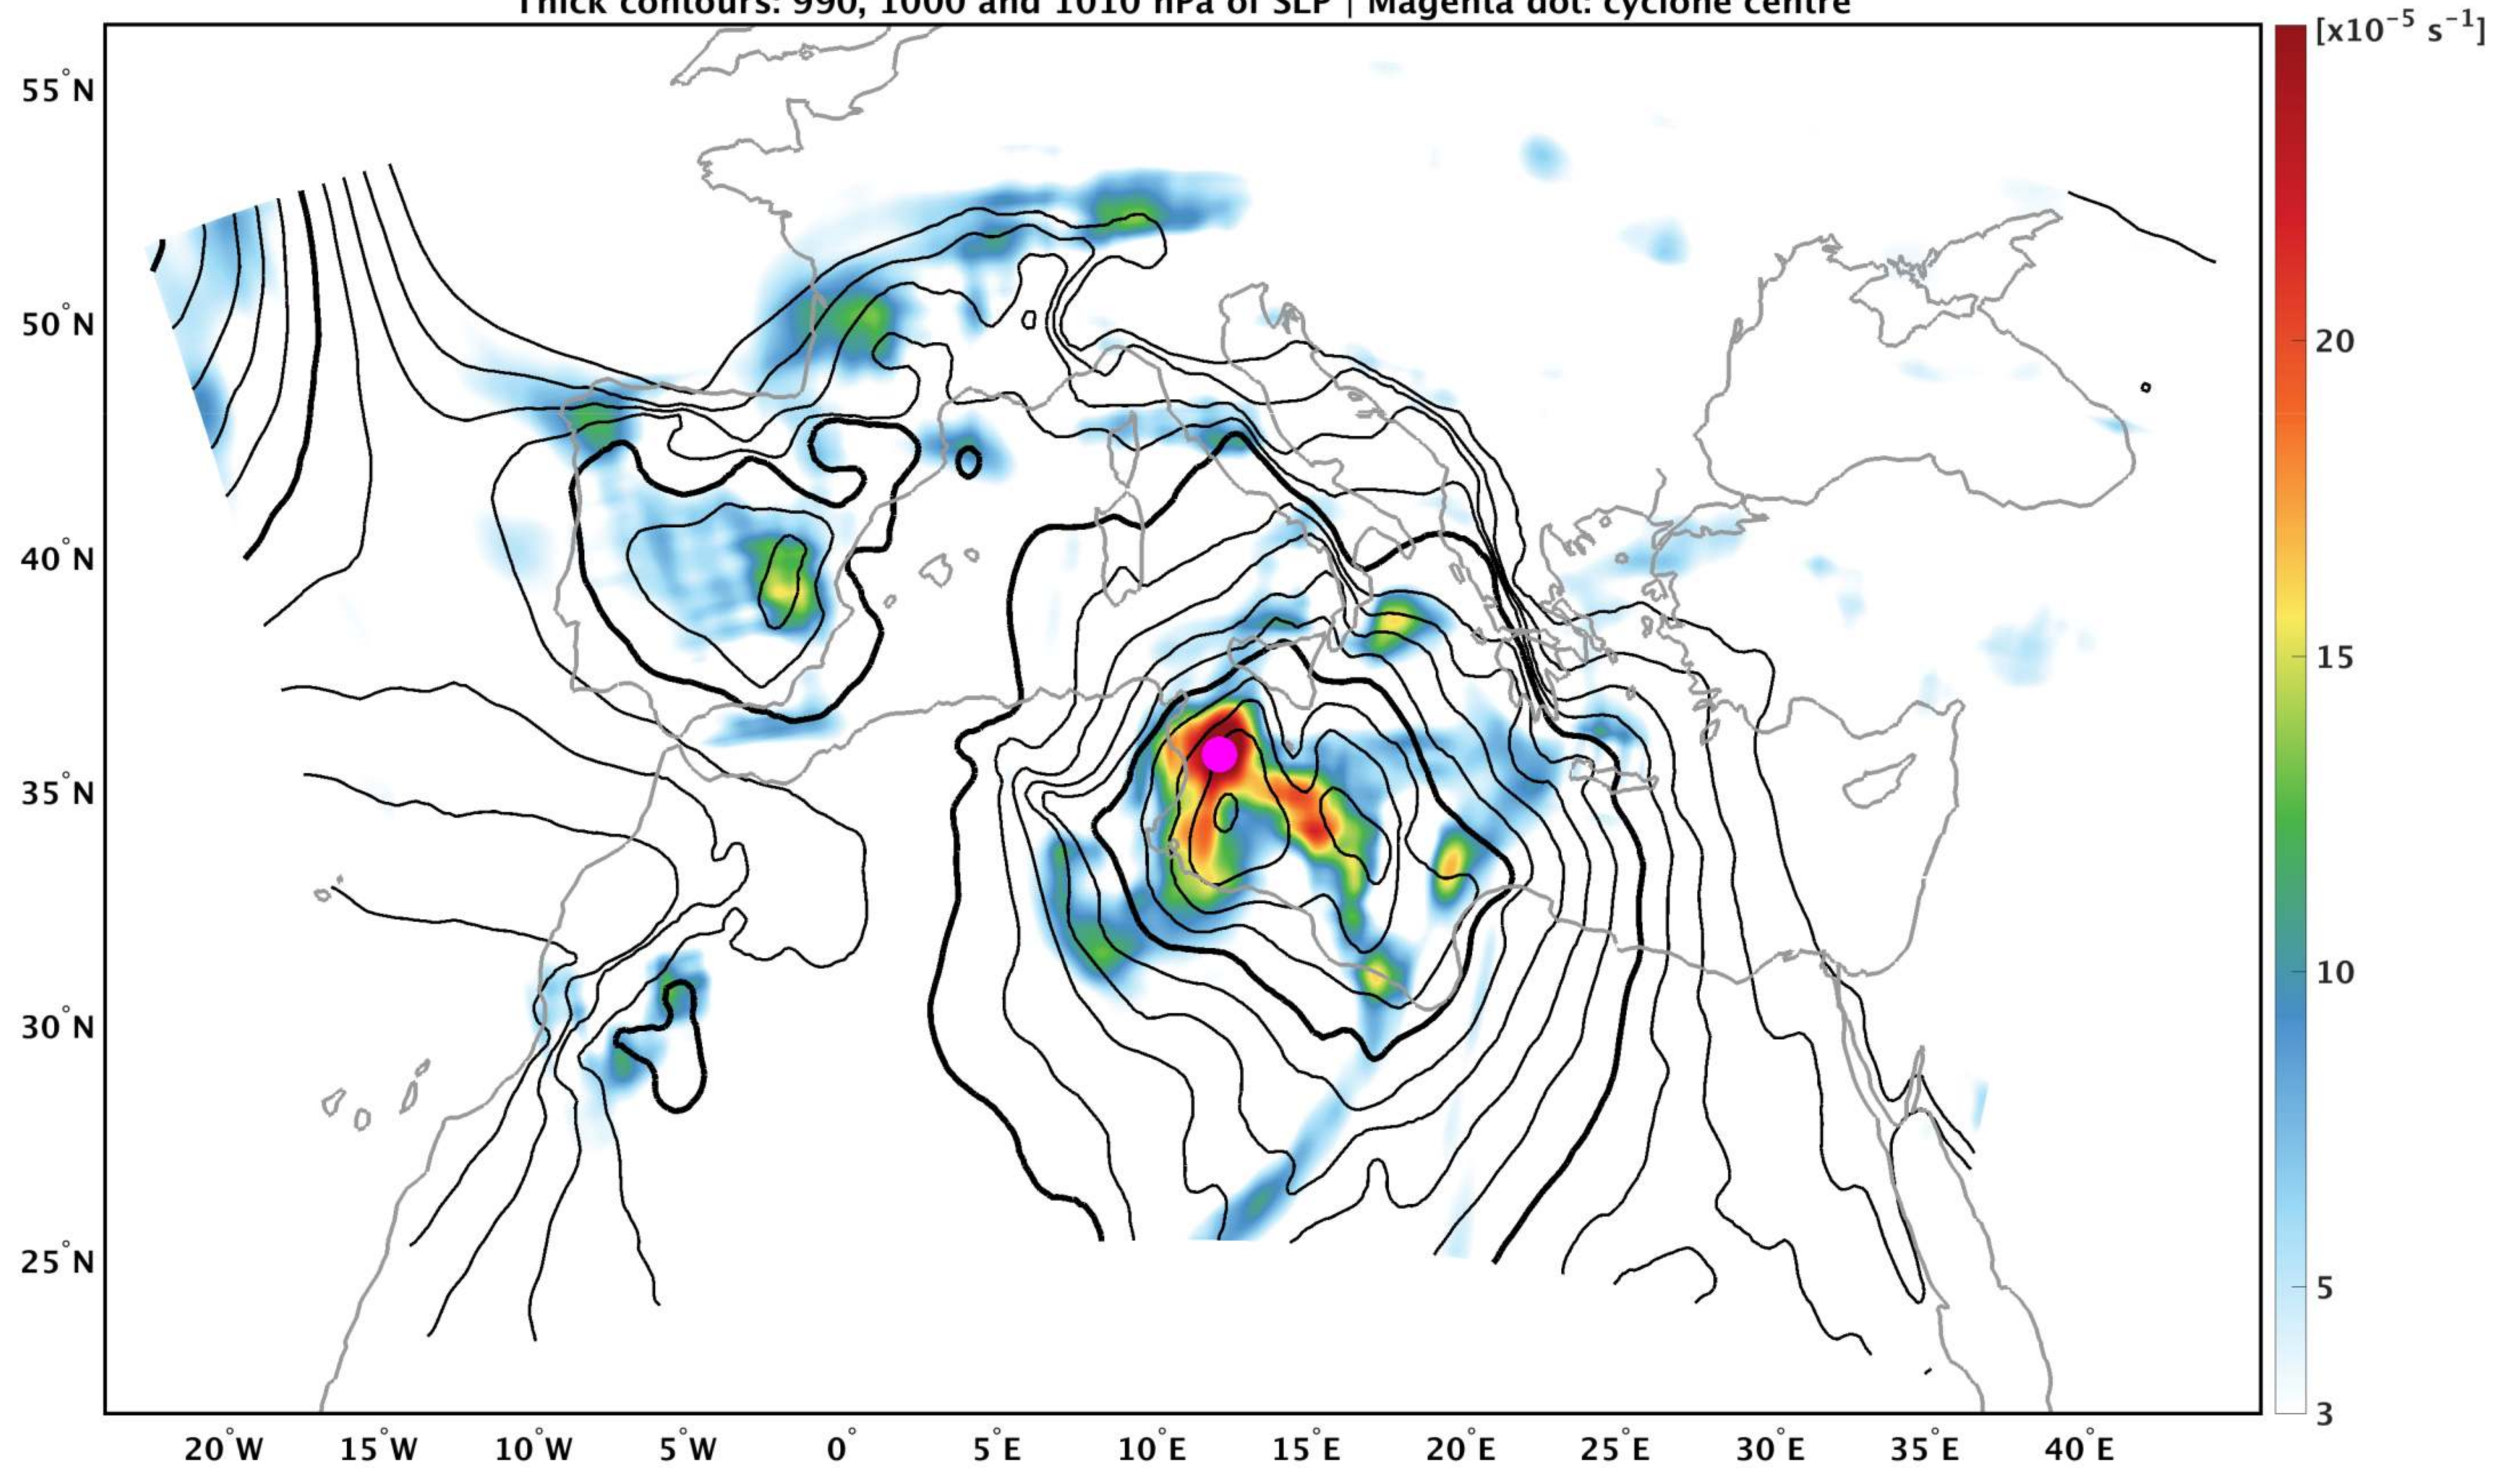



Case-56; Date: 14/4/2012

Colour: Relative vorticity ( $\times 10^{-5}$ ) | Contour: SLP (from 1018 hPa with an interval of 2 hPa)

Thick contours: 990, 1000 and 1010 hPa of SLP | Magenta dot: cyclone centre

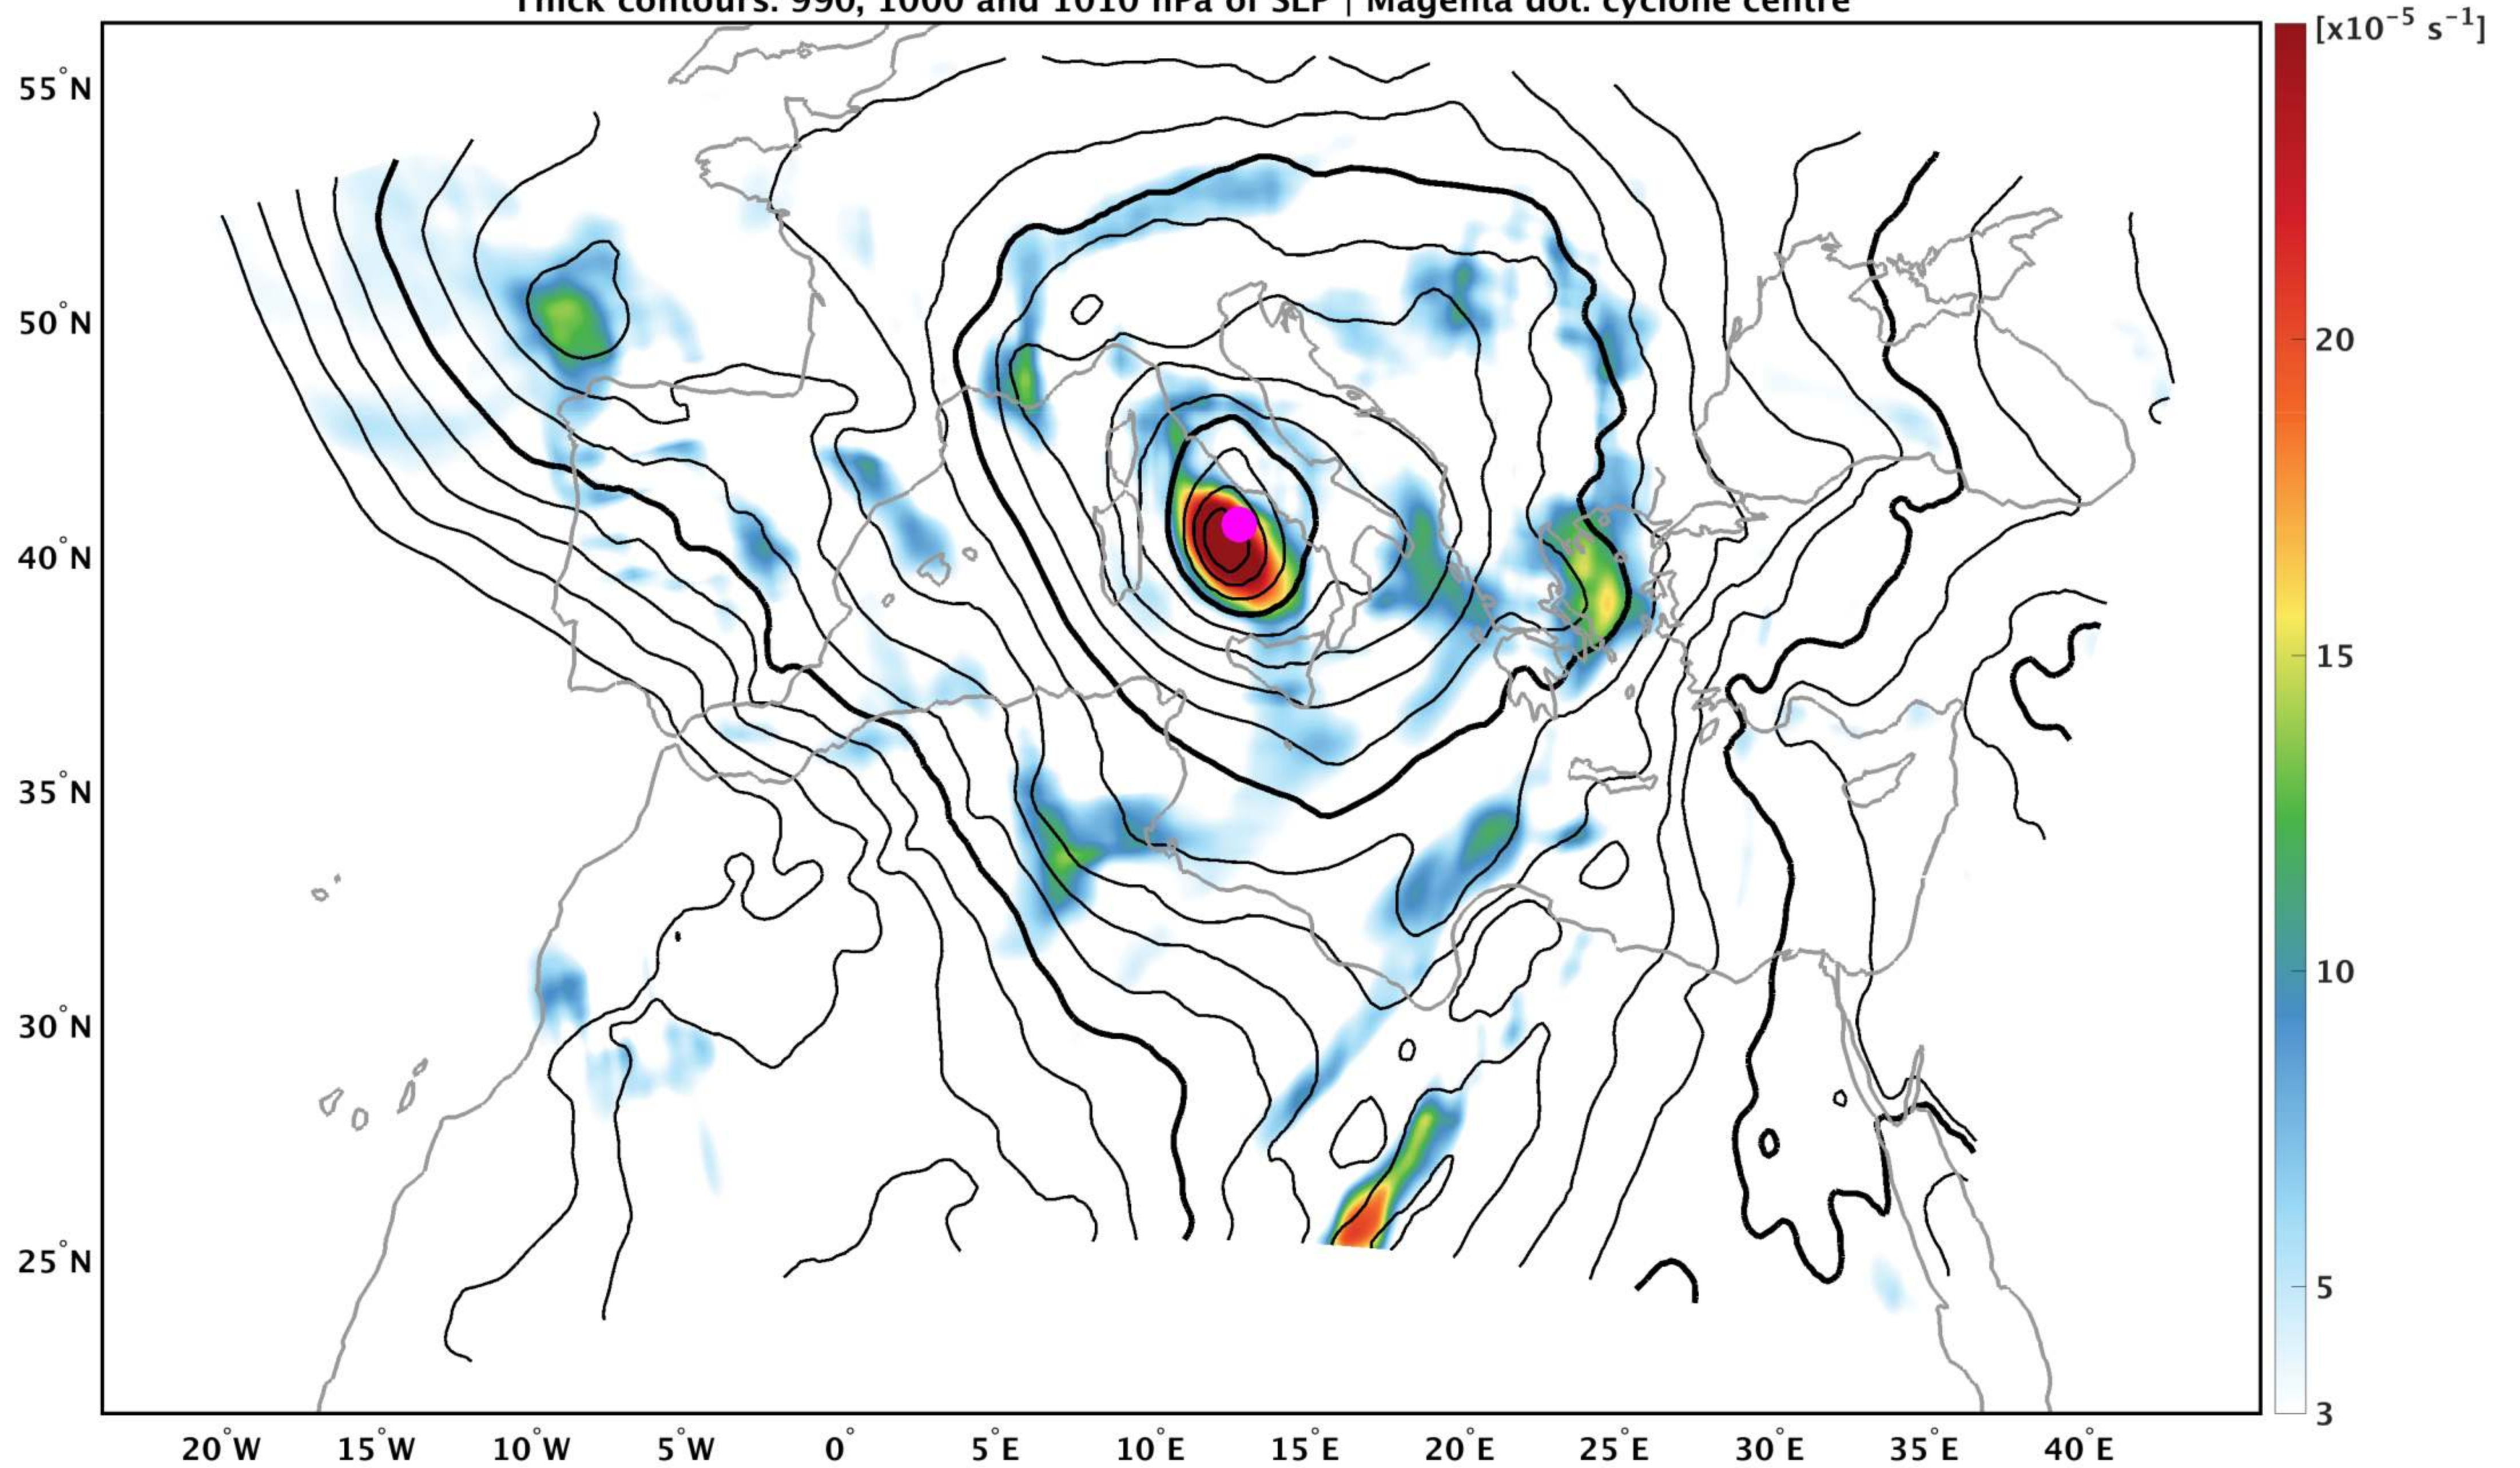



Case-57; Date: 25/3/2017

Colour: Relative vorticity ( $\times 10^{-5}$ ) | Contour: SLP (from 1018 hPa with an interval of 2 hPa)

Thick contours: 990, 1000 and 1010 hPa of SLP | Magenta dot: cyclone centre

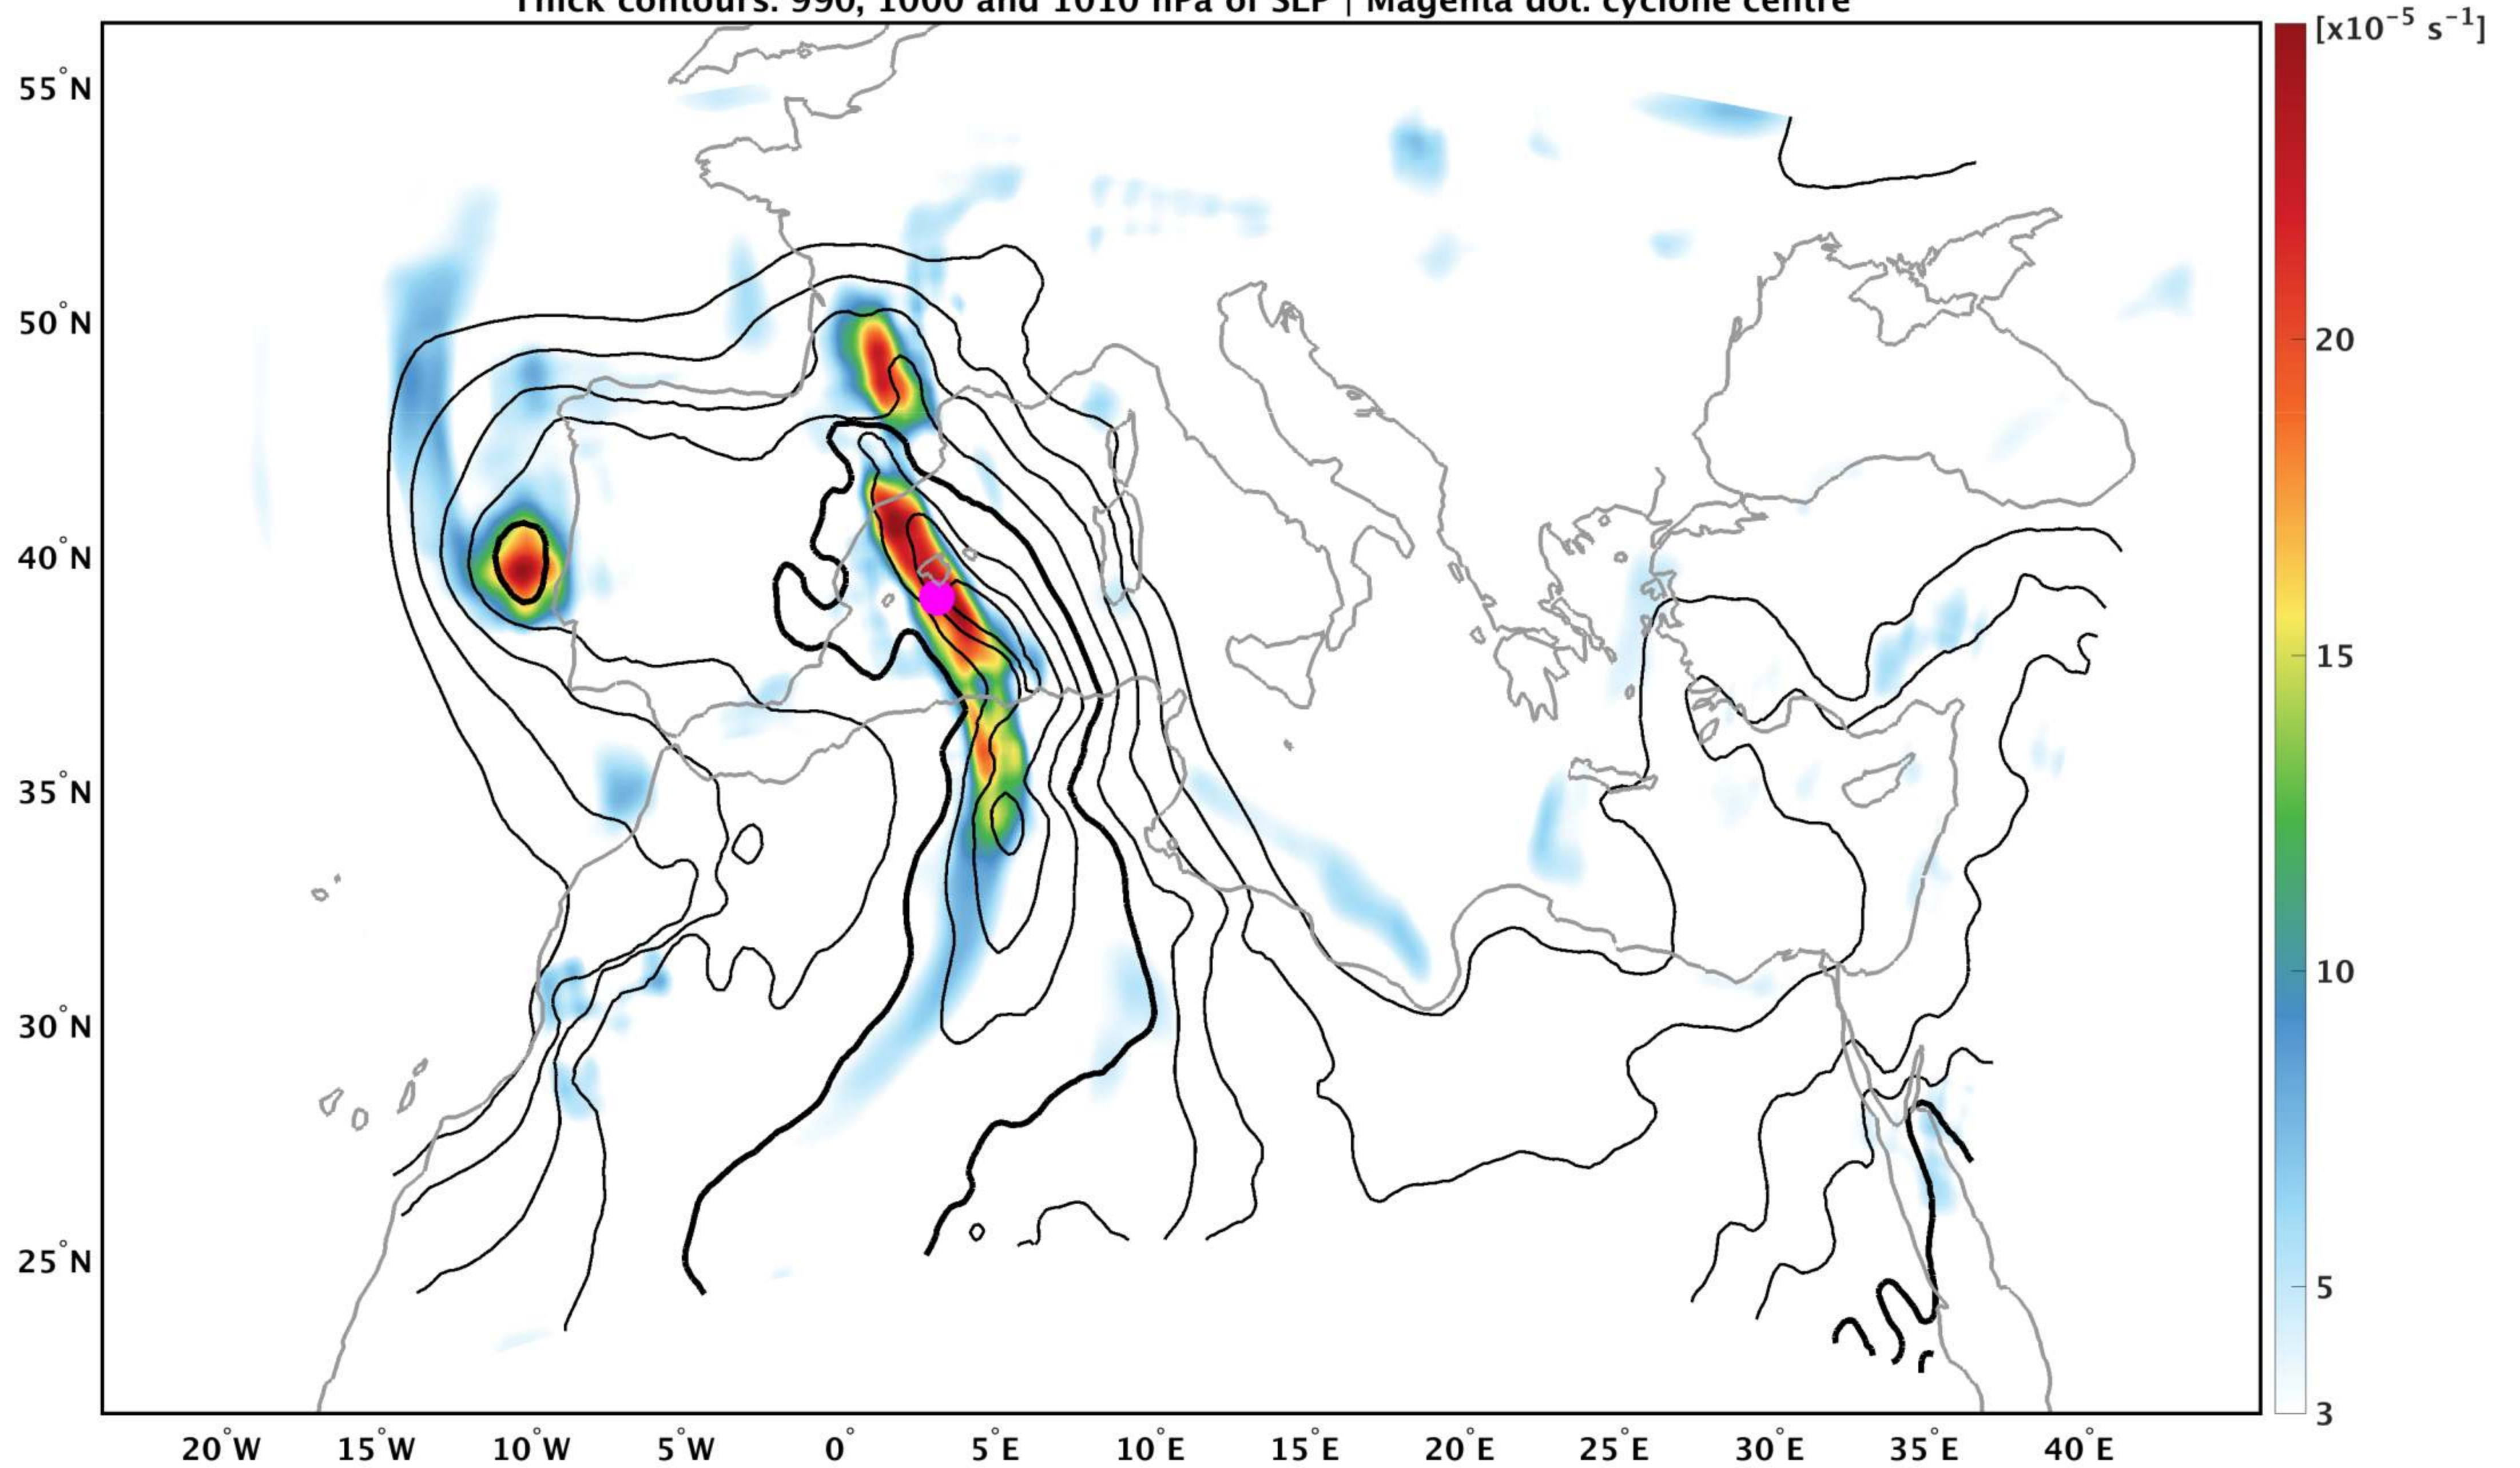



Case-58; Date: 16/11/2010

Colour: Relative vorticity ( $\times 10^{-5}$ ) | Contour: SLP (from 1018 hPa with an interval of 2 hPa)

Thick contours: 990, 1000 and 1010 hPa of SLP | Magenta dot: cyclone centre

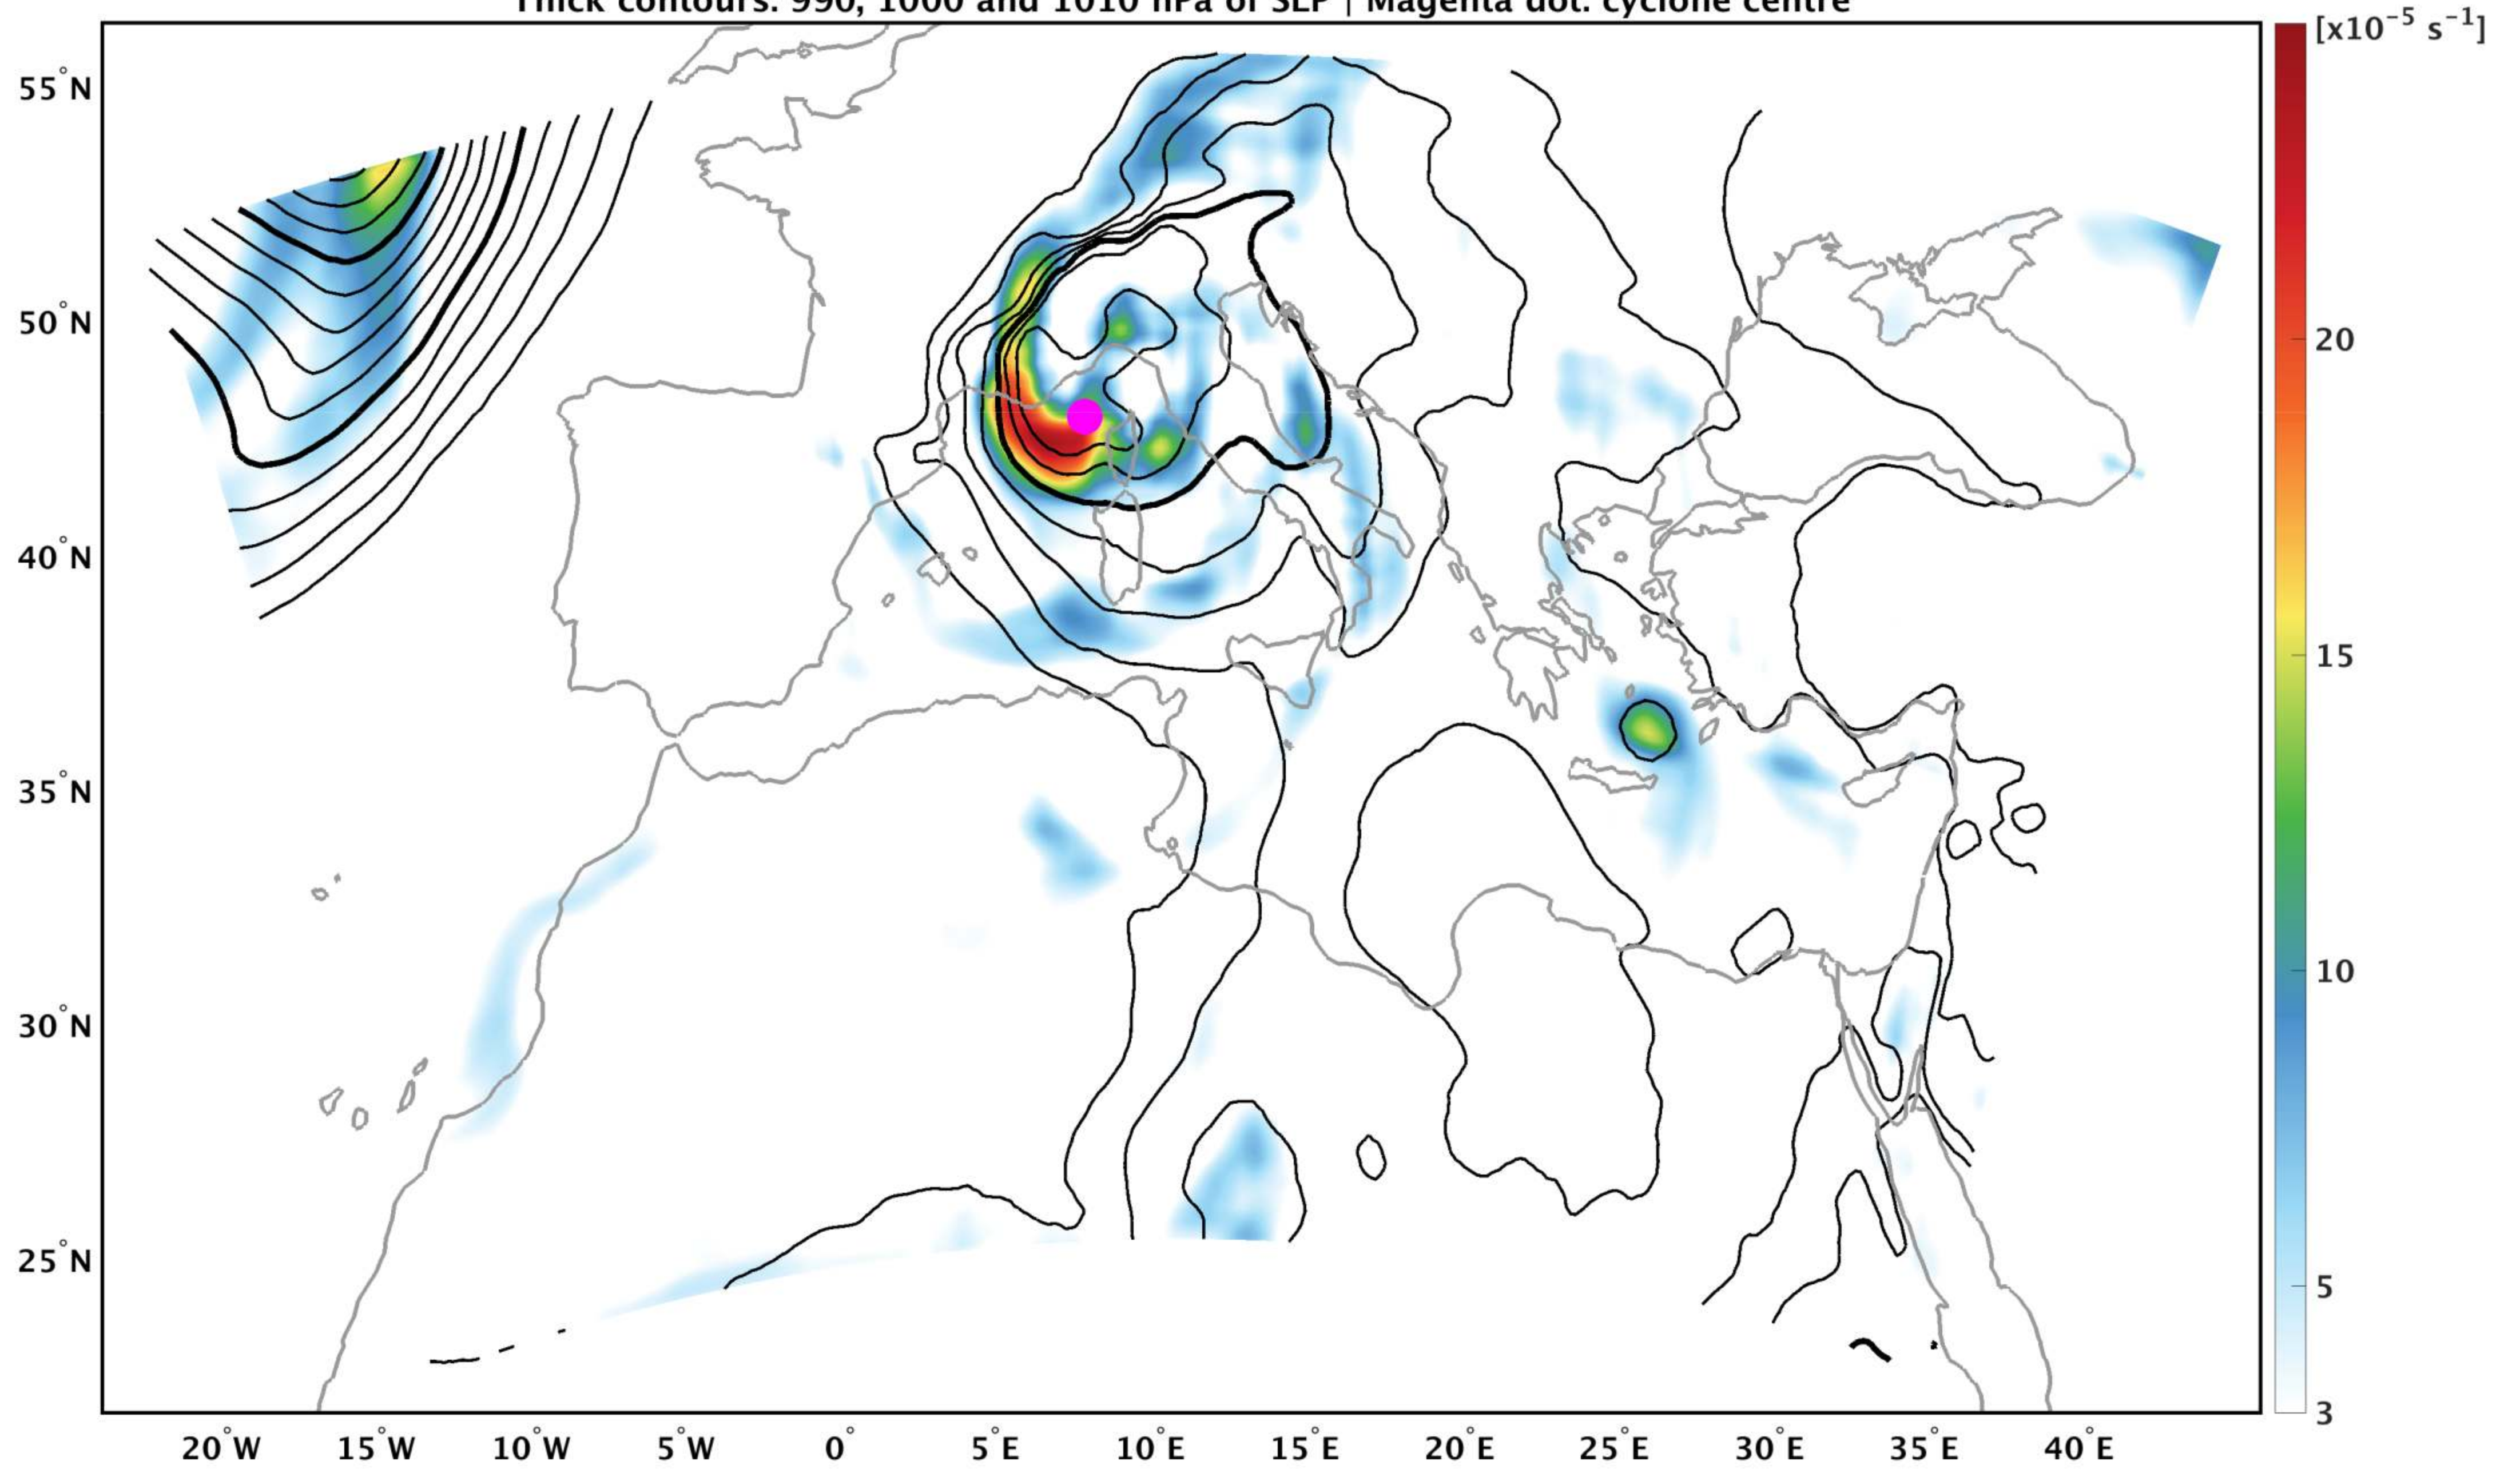



Case-59; Date: 7/4/2016

Colour: Relative vorticity ( $\times 10^{-5}$ ) | Contour: SLP (from 1018 hPa with an interval of 2 hPa)

Thick contours: 990, 1000 and 1010 hPa of SLP | Magenta dot: cyclone centre

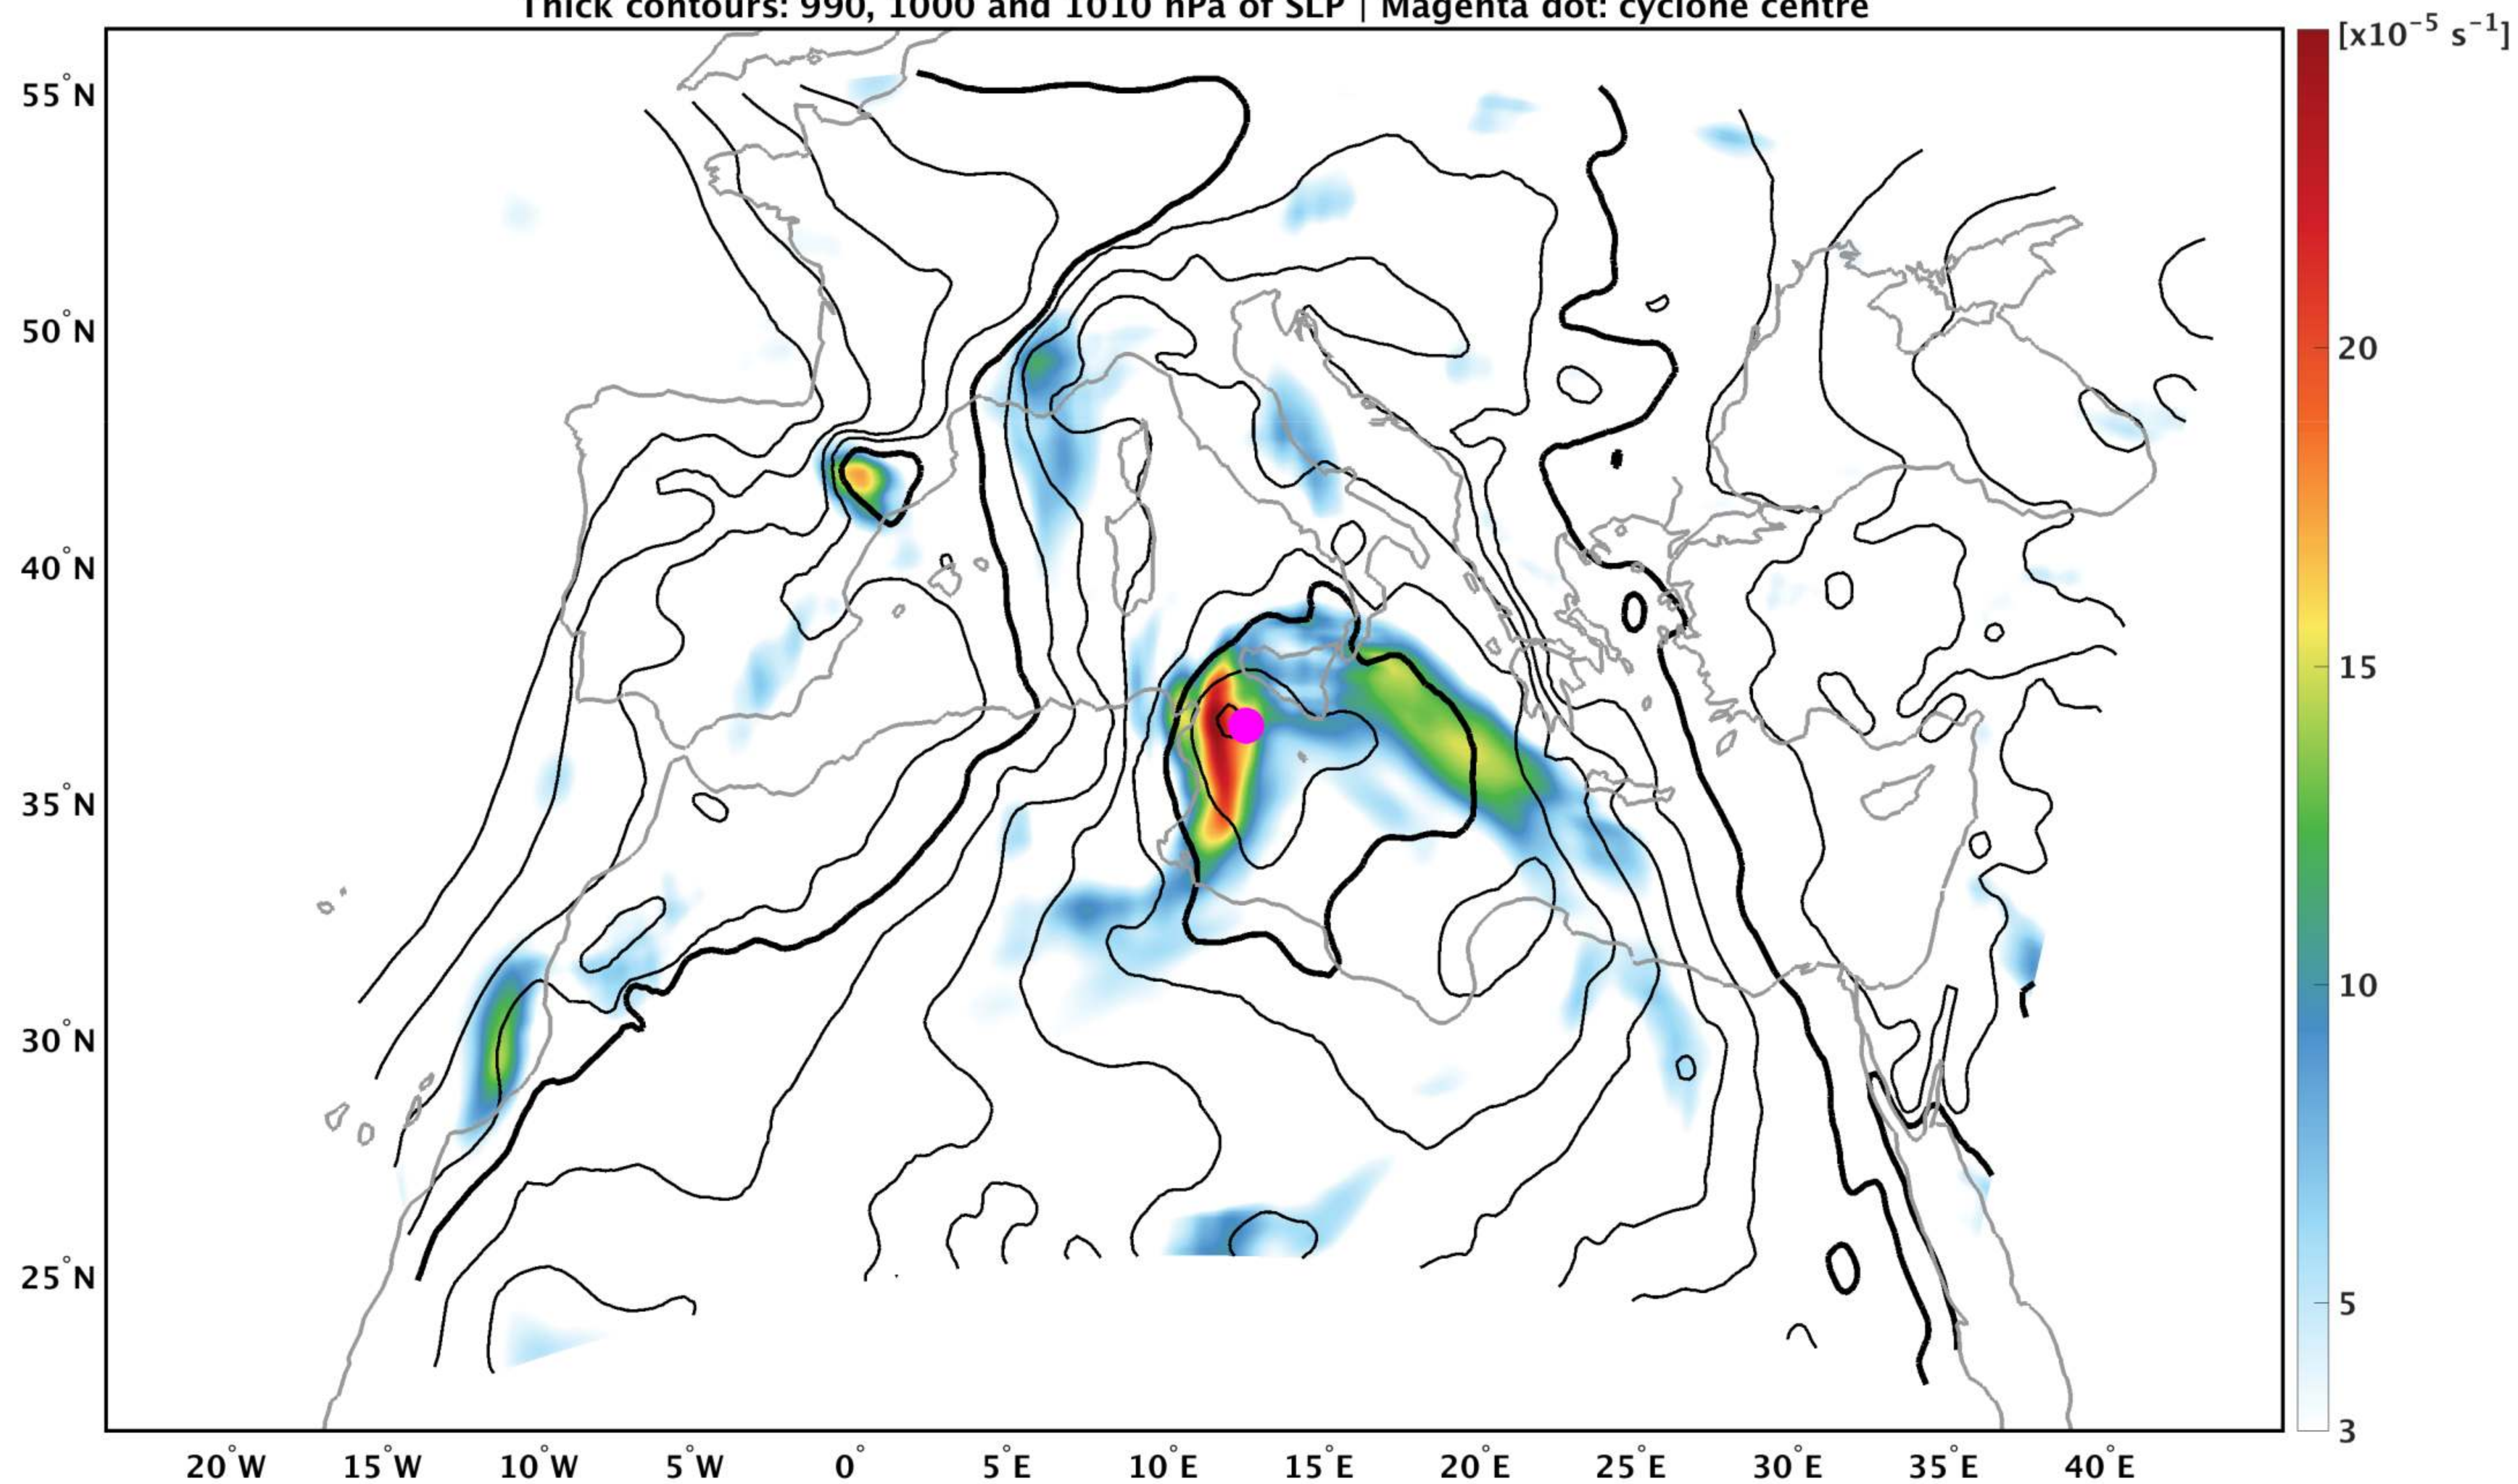



Case-60; Date: 22/12/2008

Colour: Relative vorticity ( $\times 10^{-5}$ ) | Contour: SLP (from 1018 hPa with an interval of 2 hPa)

Thick contours: 990, 1000 and 1010 hPa of SLP | Magenta dot: cyclone centre

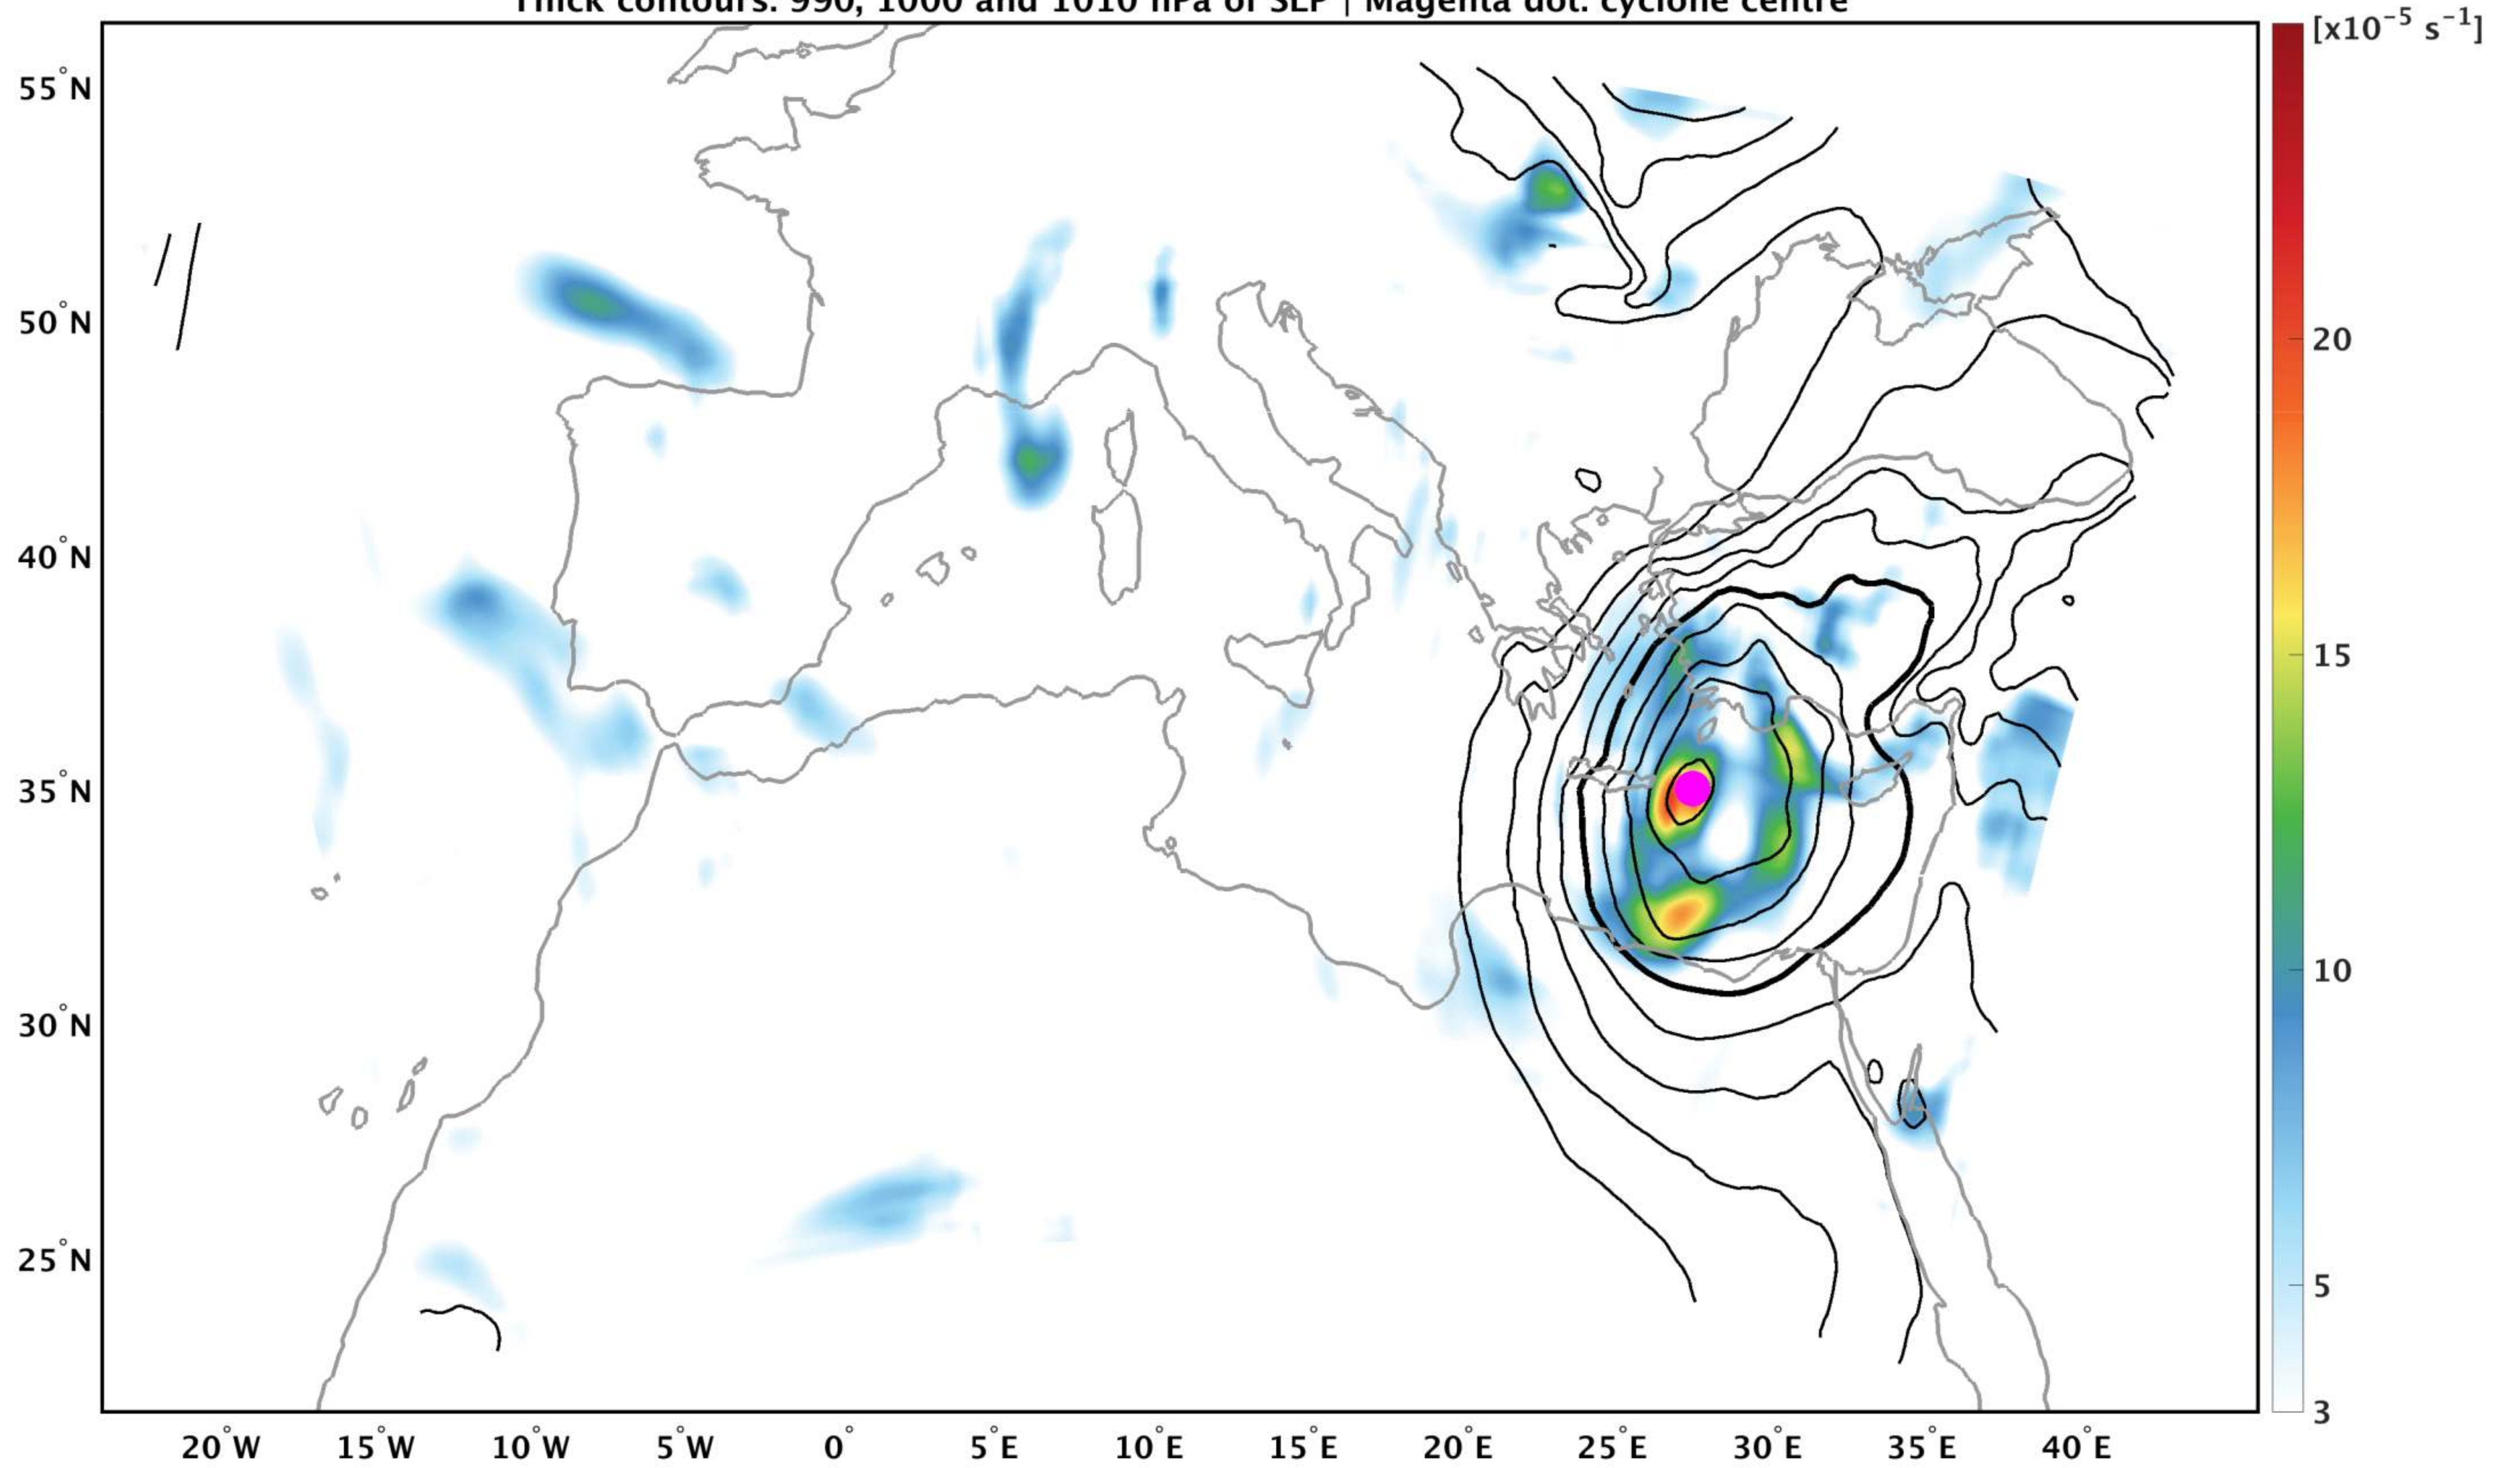



Case-61; Date: 28/3/2008

Colour: Relative vorticity ( $\times 10^{-5}$ ) | Contour: SLP (from 1018 hPa with an interval of 2 hPa)

Thick contours: 990, 1000 and 1010 hPa of SLP | Magenta dot: cyclone centre

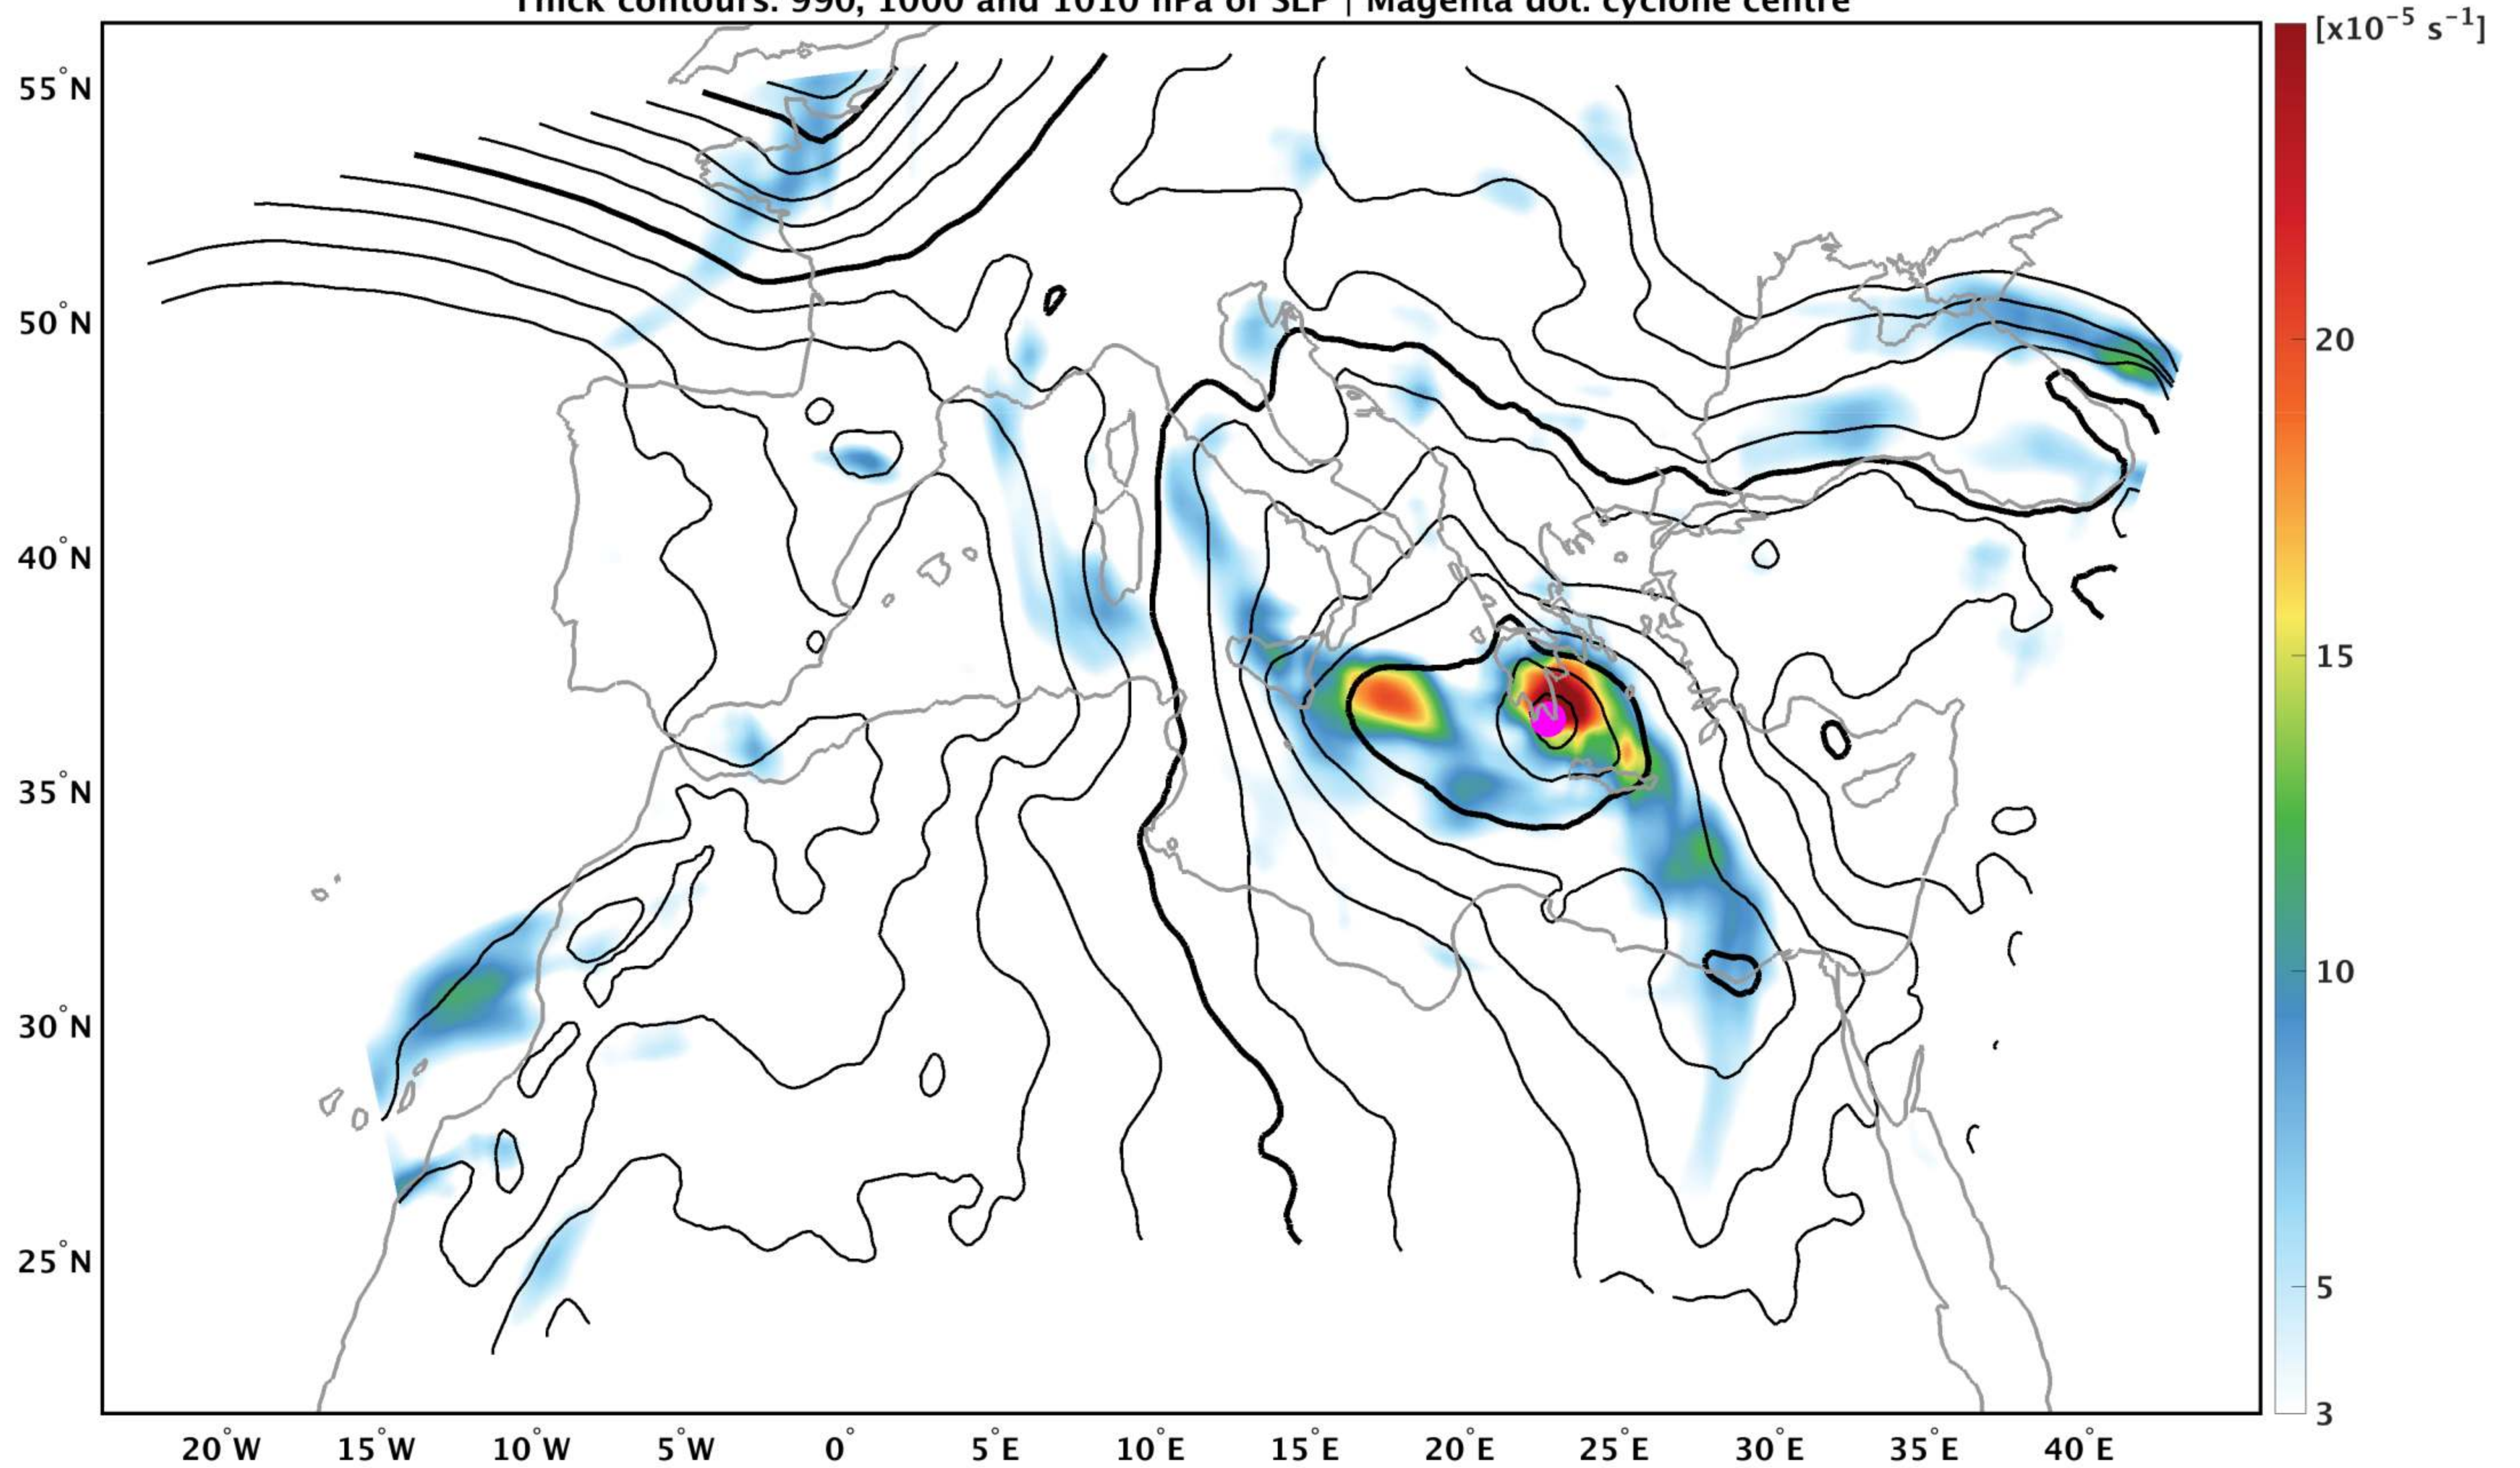



Case-62; Date: 30/4/2011

Colour: Relative vorticity ( $\times 10^{-5}$ ) | Contour: SLP (from 1018 hPa with an interval of 2 hPa)

Thick contours: 990, 1000 and 1010 hPa of SLP | Magenta dot: cyclone centre

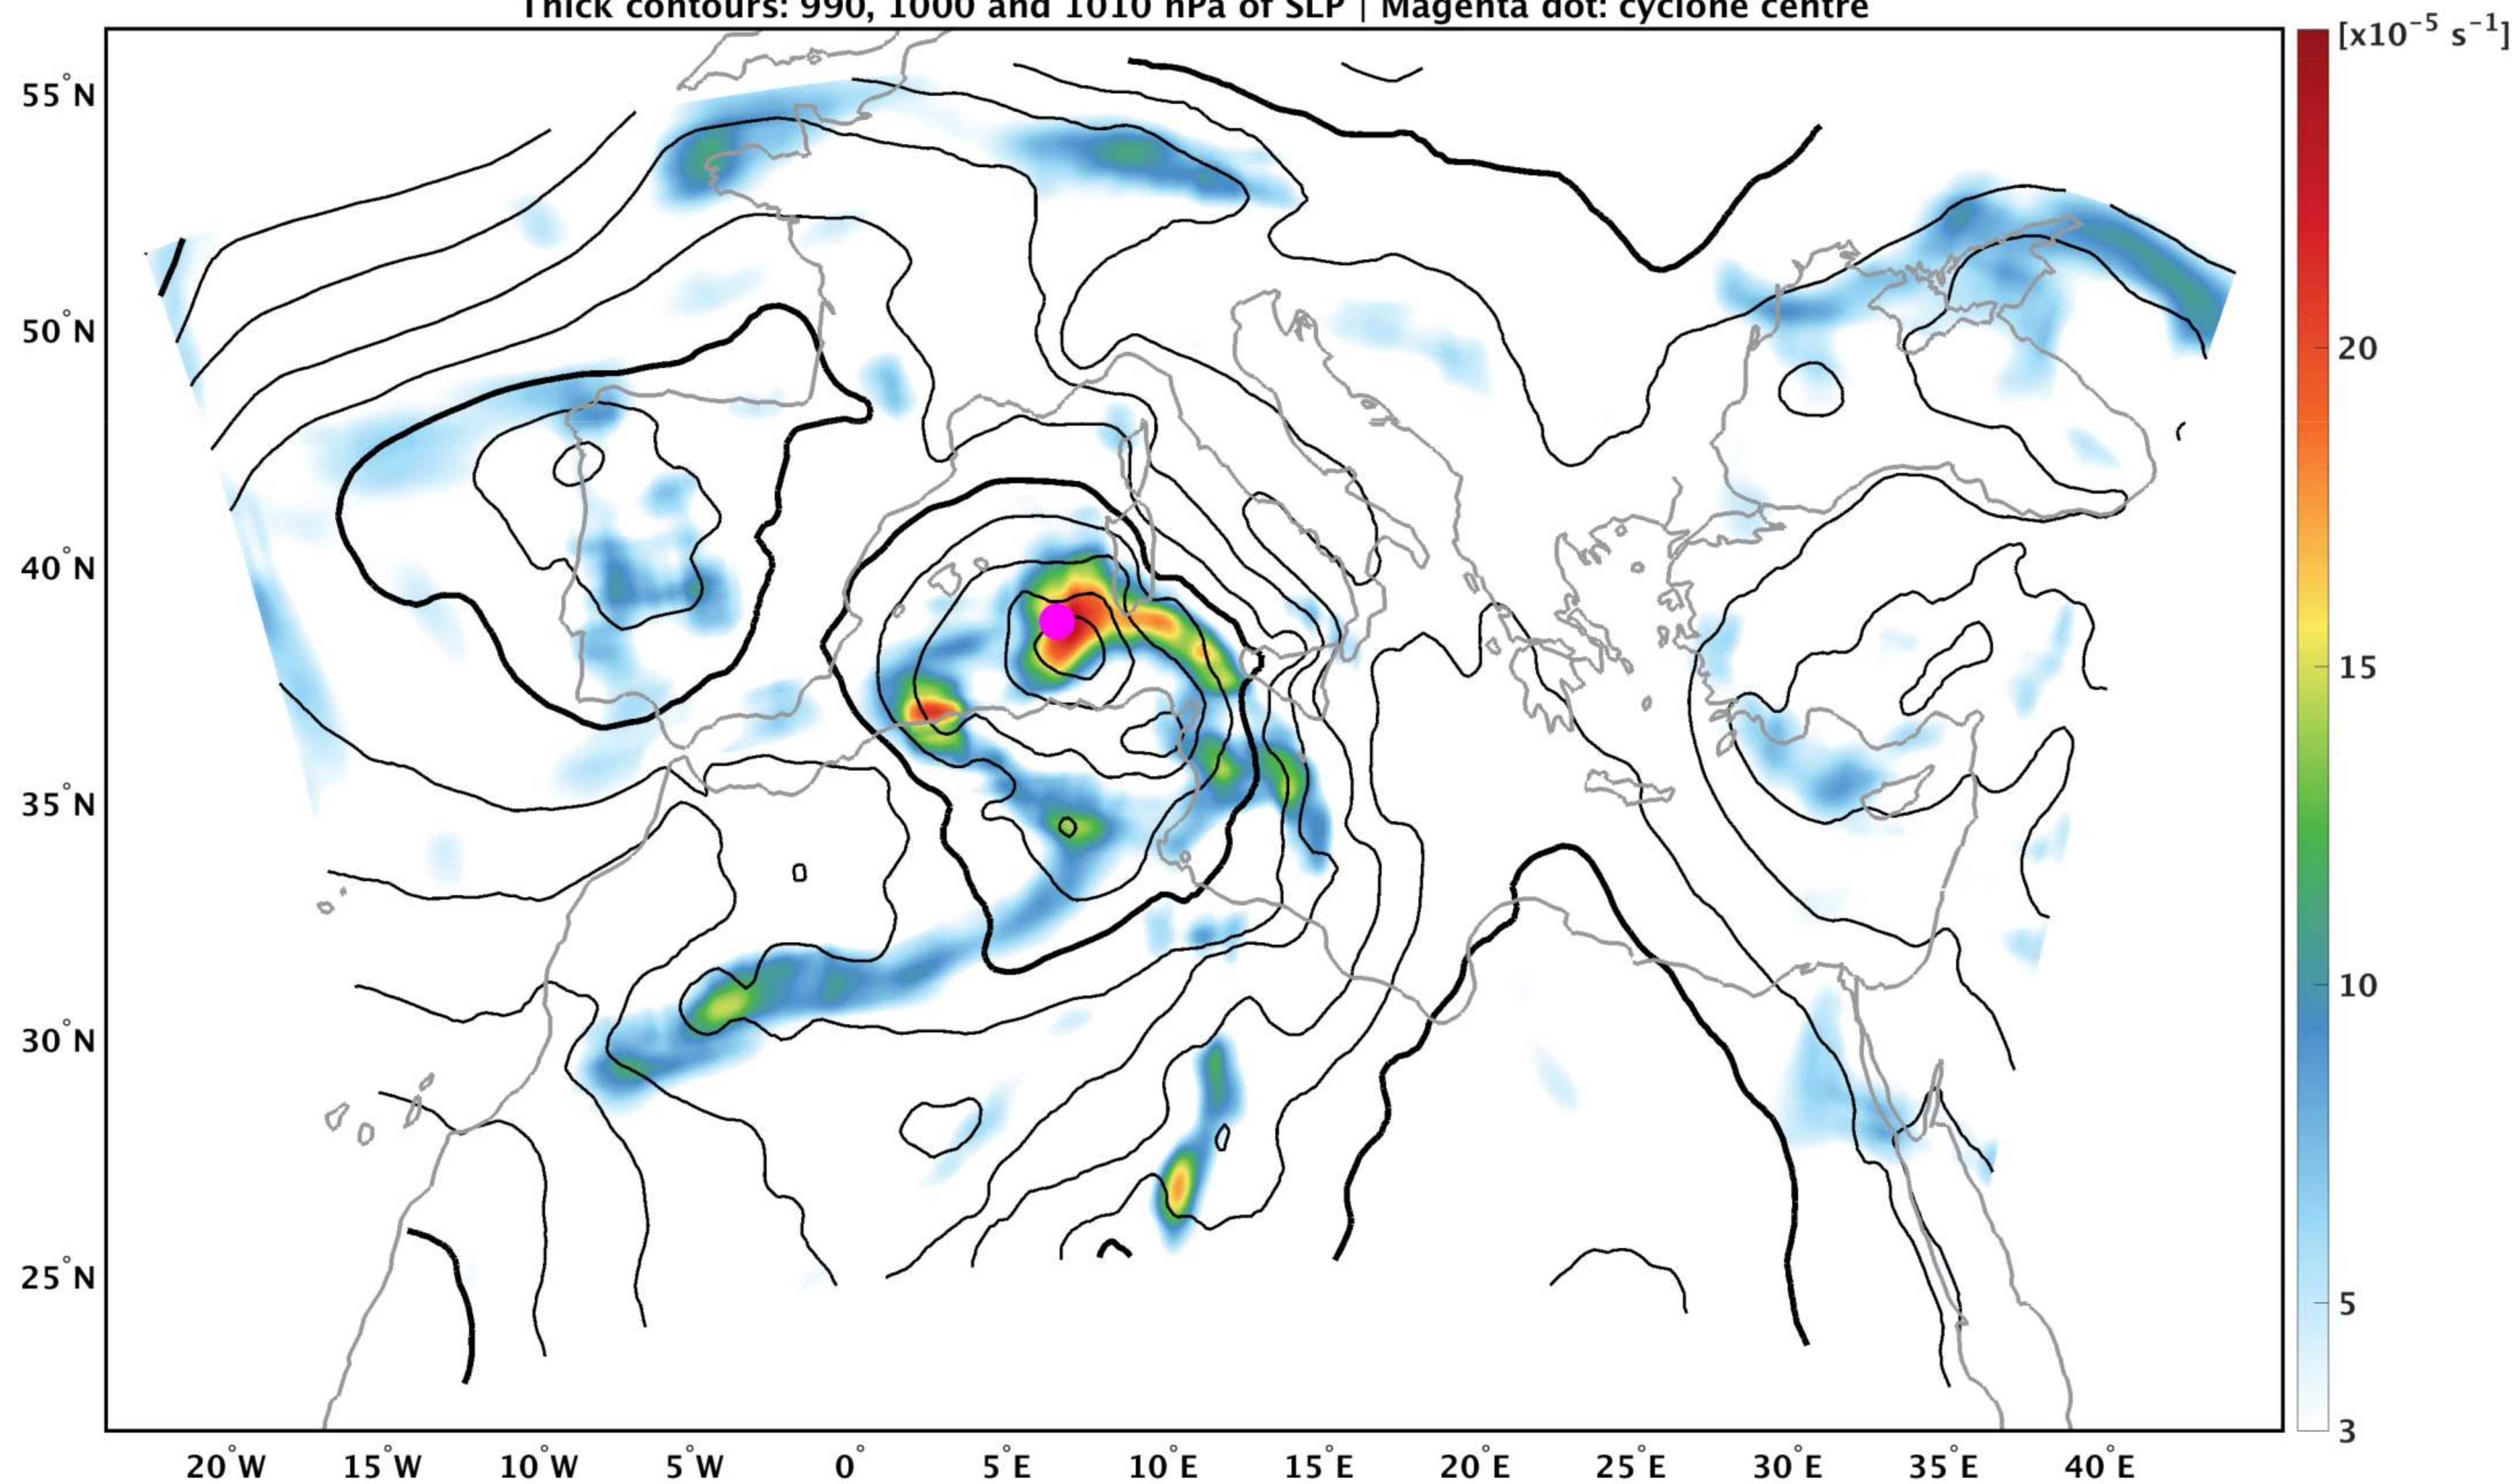



Case-63; Date: 6/9/2016

Colour: Relative vorticity ( $\times 10^{-5}$ ) | Contour: SLP (from 1018 hPa with an interval of 2 hPa)

Thick contours: 990, 1000 and 1010 hPa of SLP | Magenta dot: cyclone centre

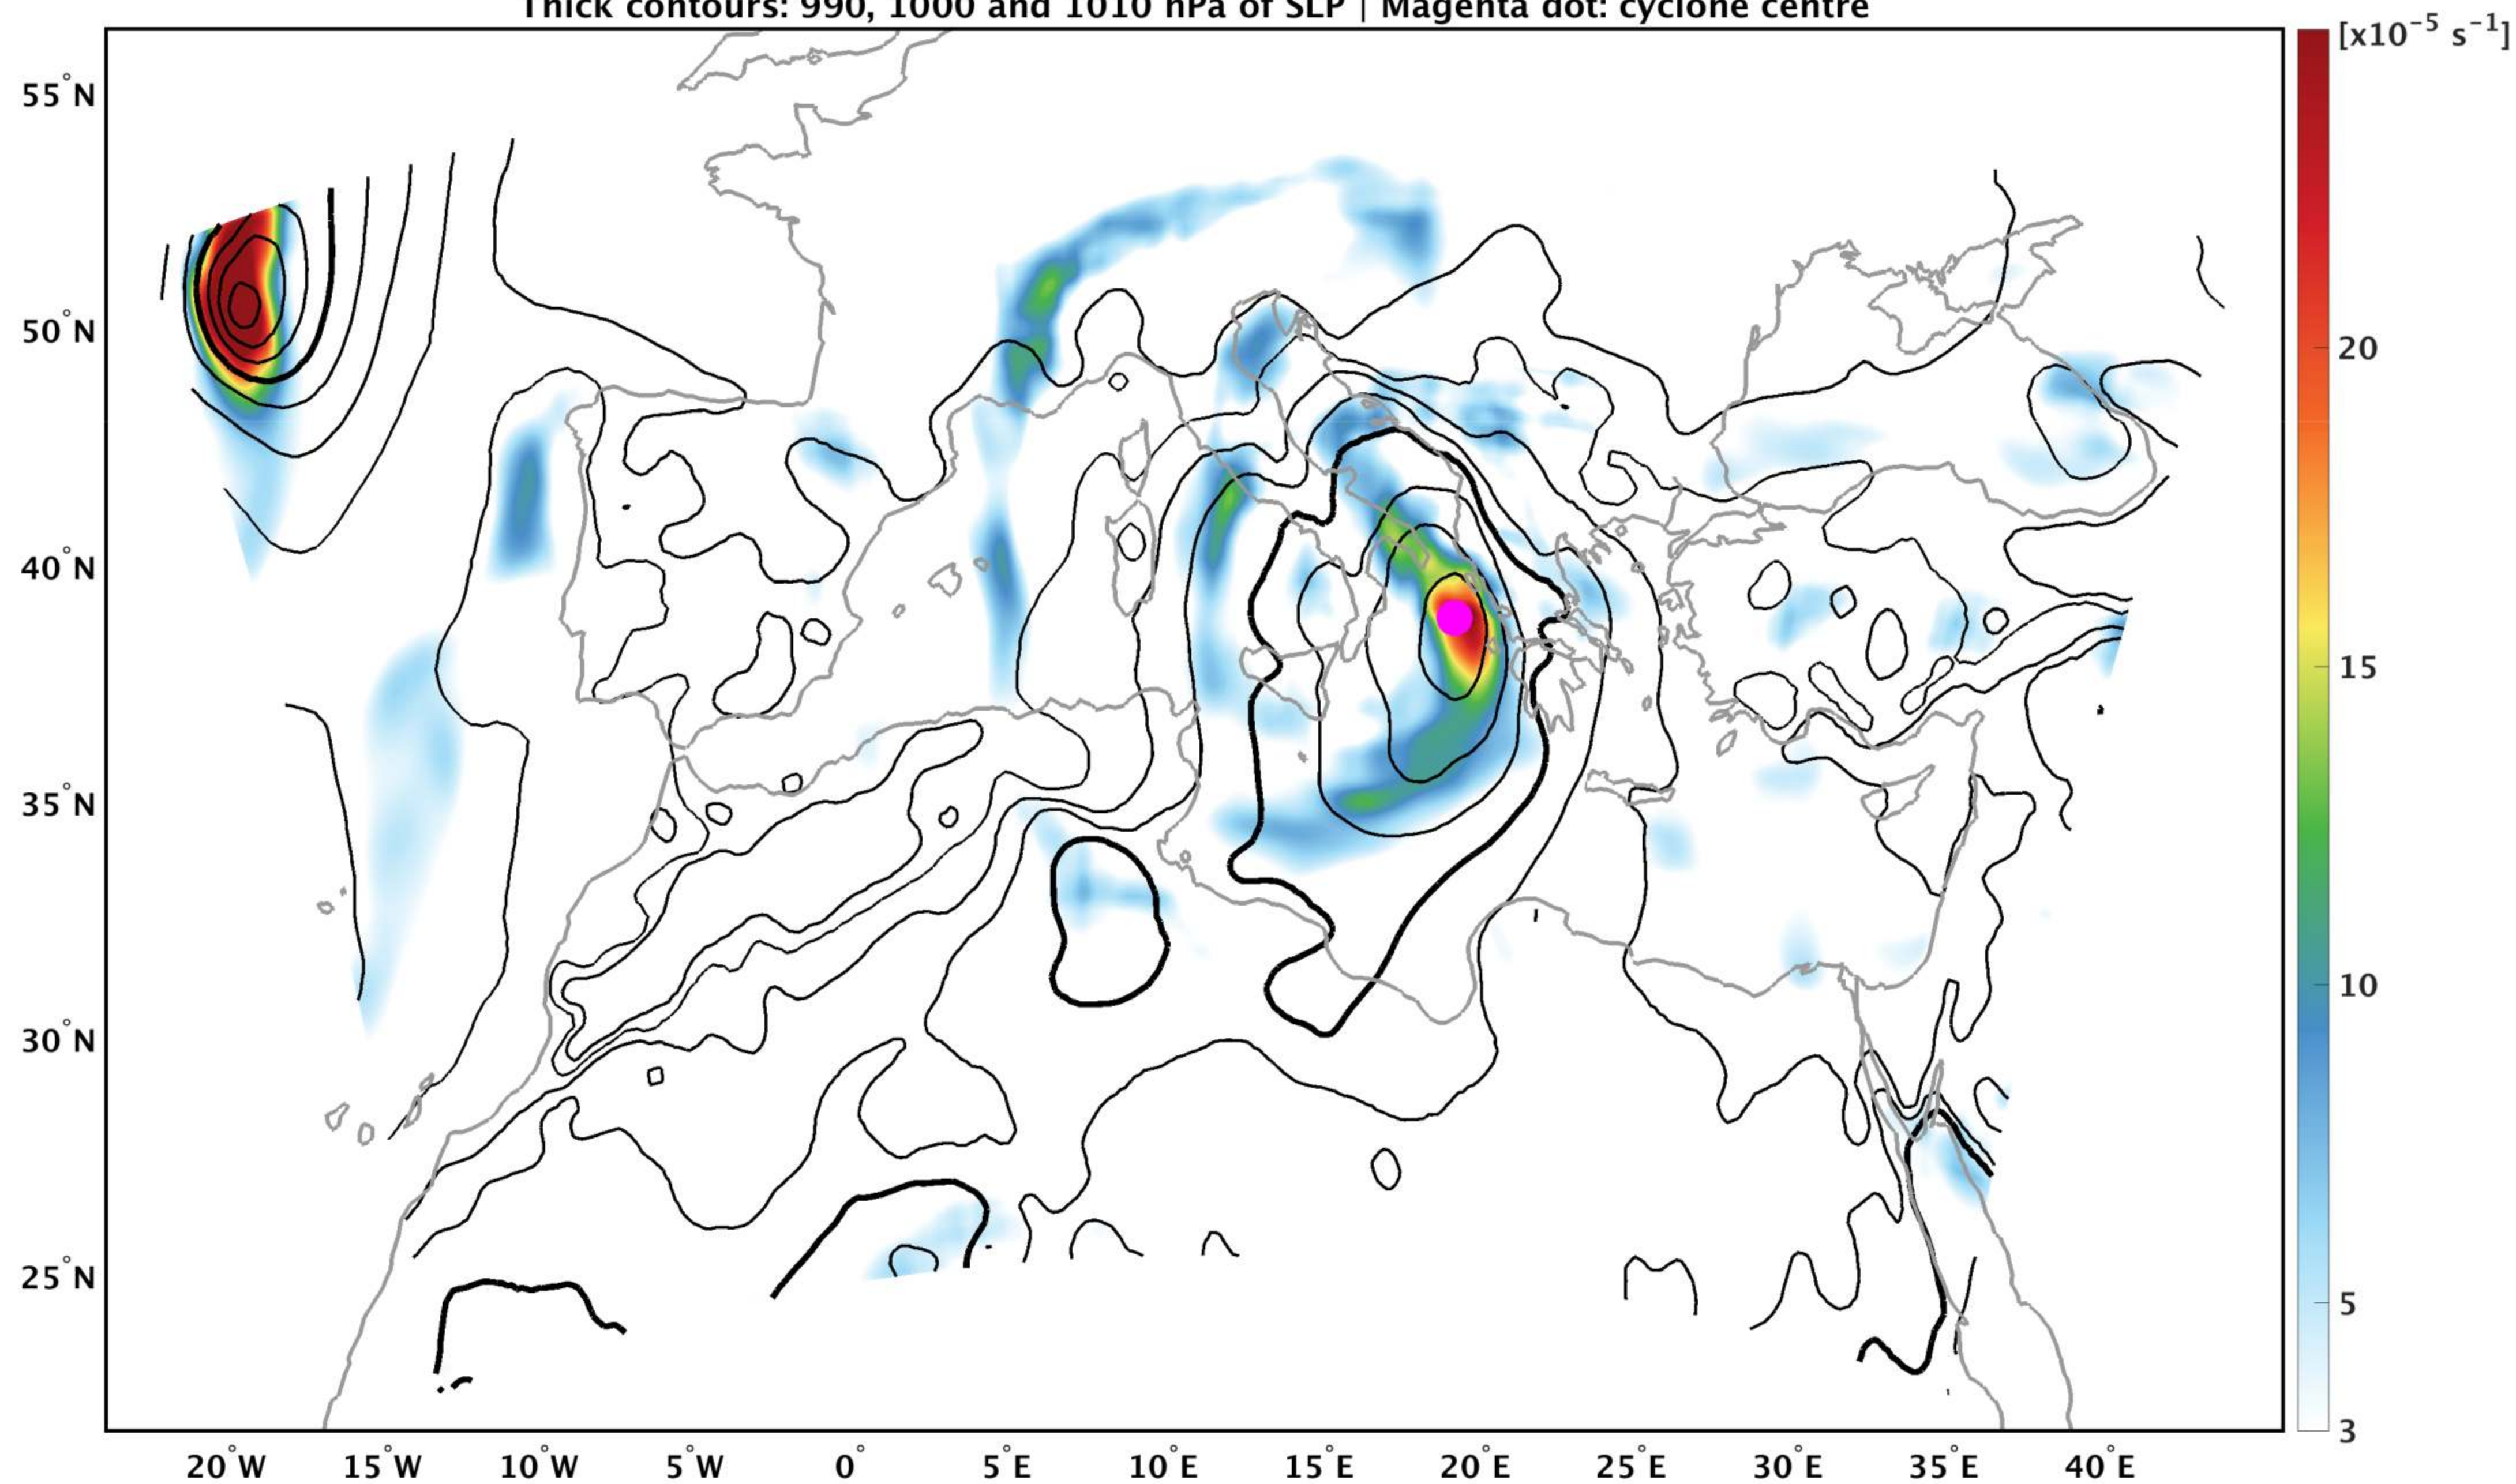



Case-64; Date: 28/1/2013

Colour: Relative vorticity ( $\times 10^{-5}$ ) | Contour: SLP (from 1018 hPa with an interval of 2 hPa)

Thick contours: 990, 1000 and 1010 hPa of SLP | Magenta dot: cyclone centre

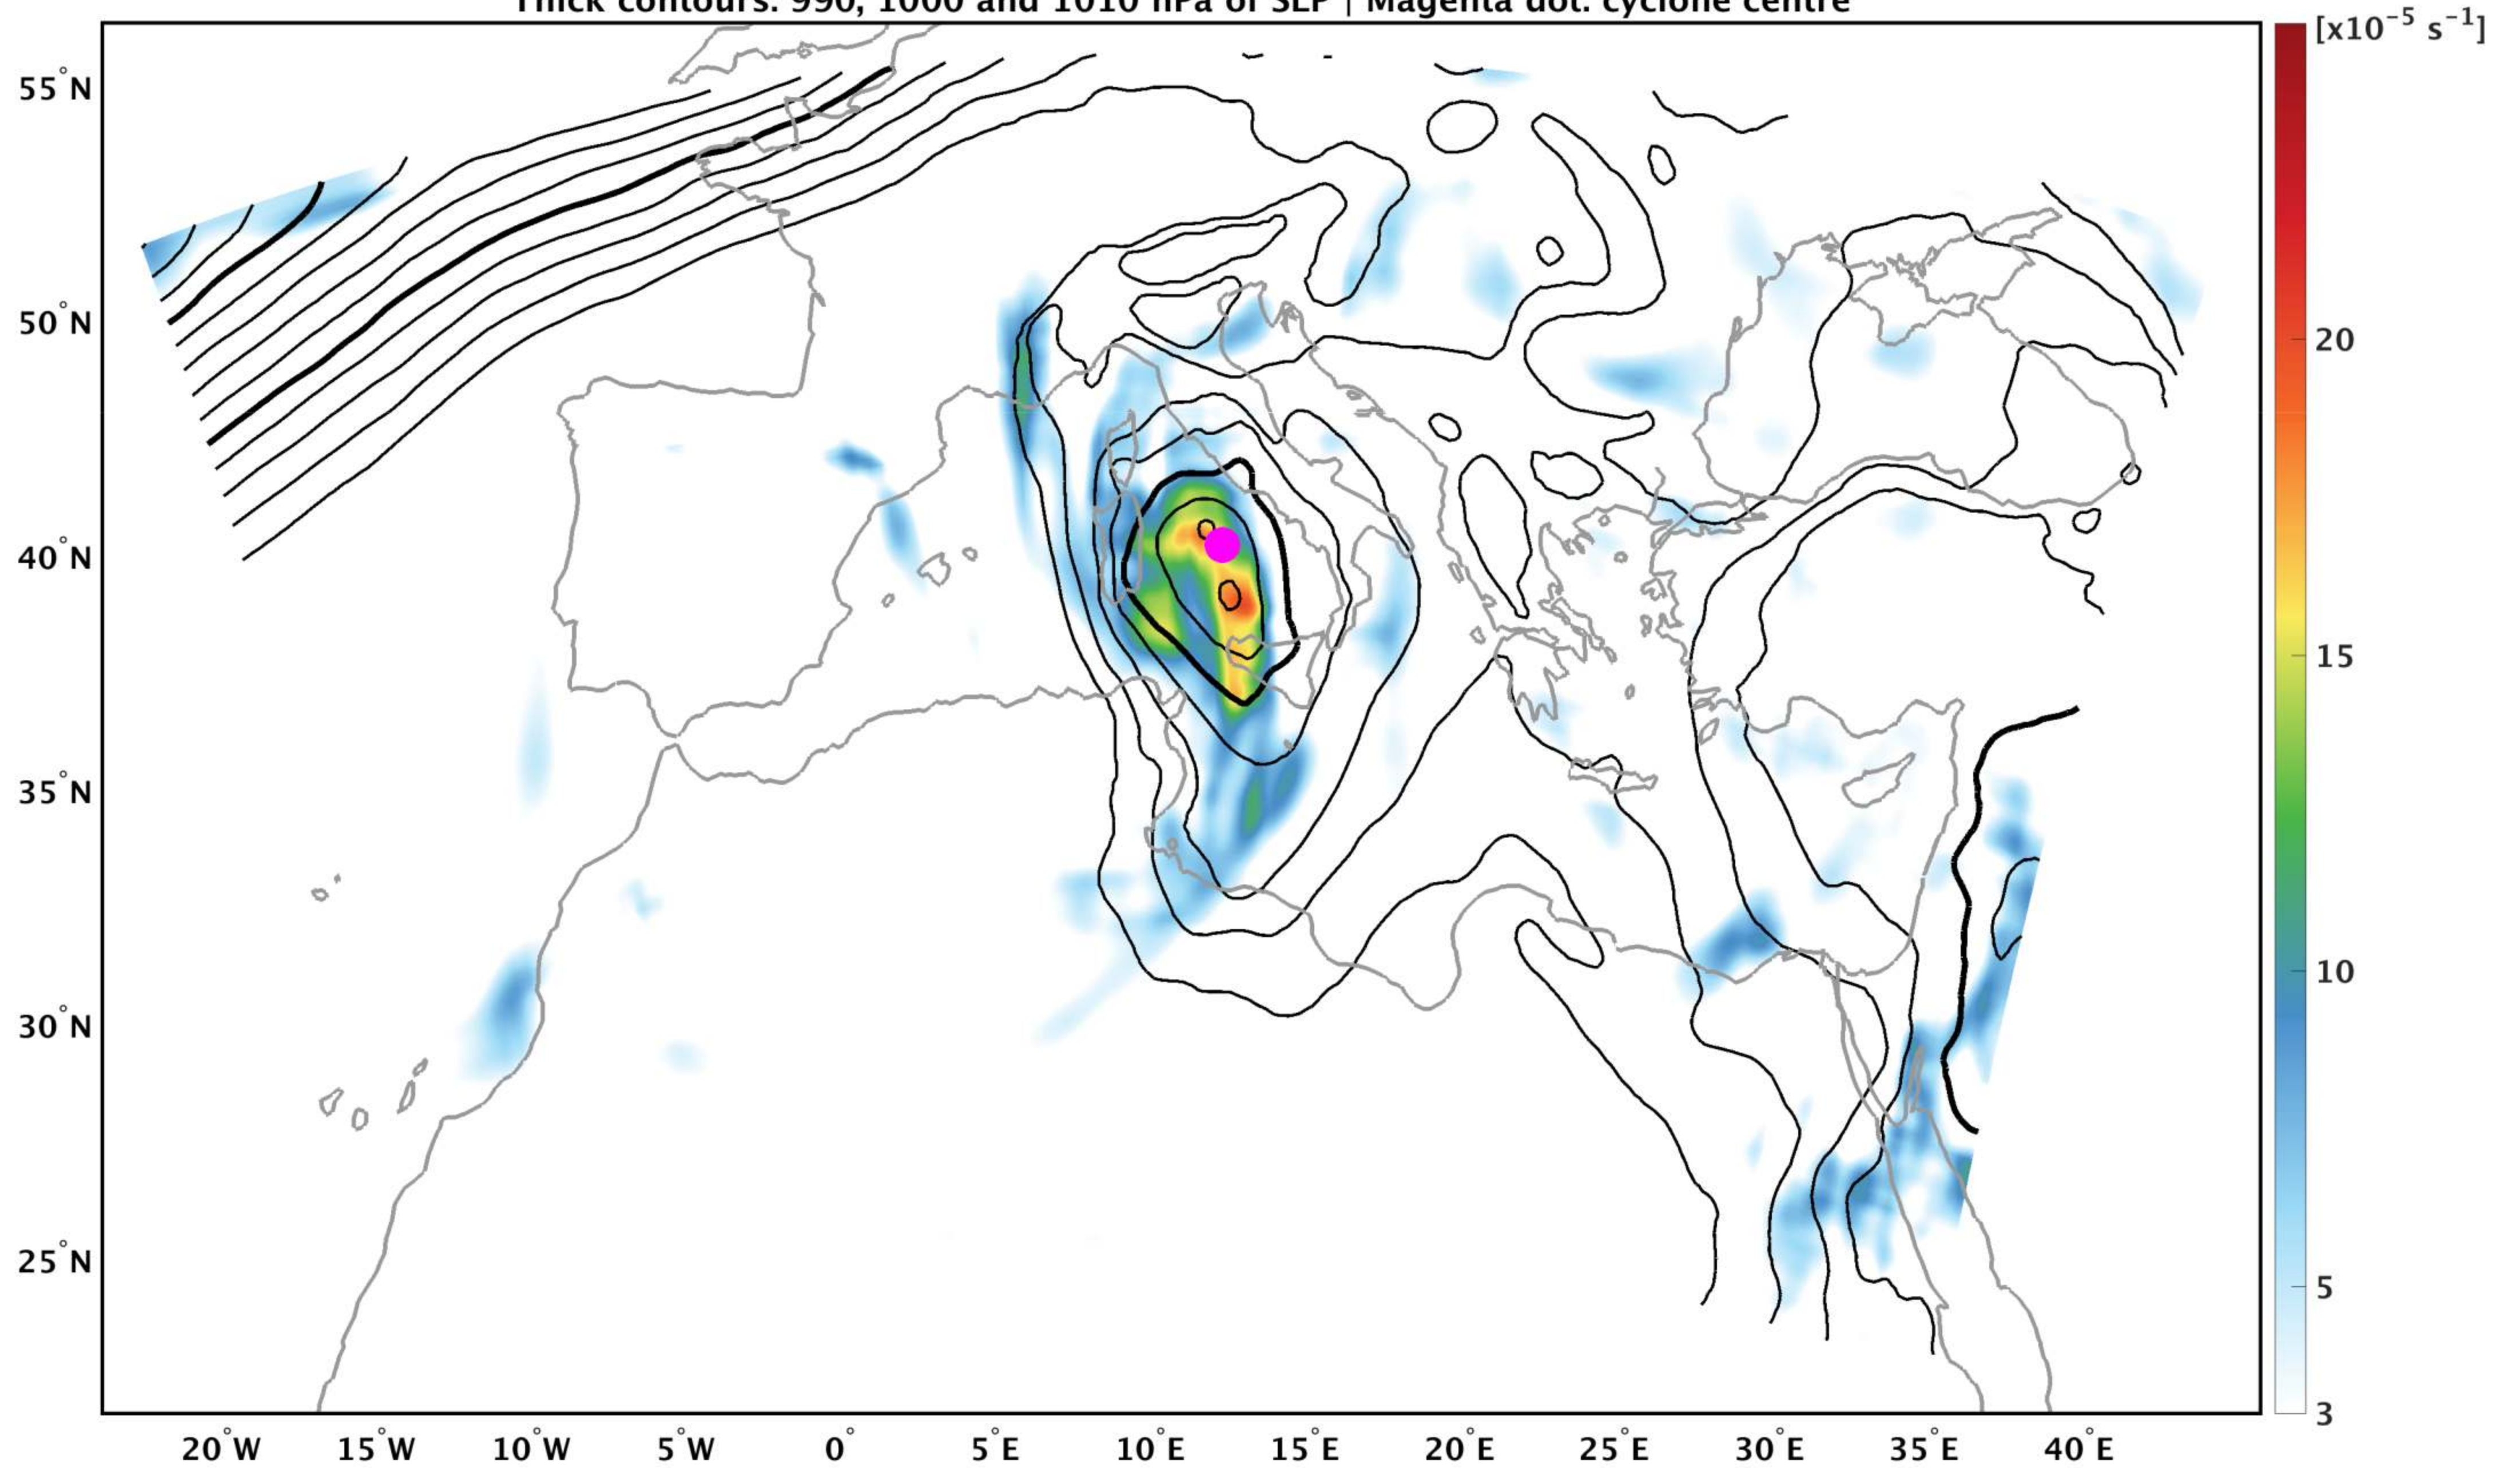



Case-65; Date: 27/1/2009

Colour: Relative vorticity ( $\times 10^{-5}$ ) | Contour: SLP (from 1018 hPa with an interval of 2 hPa)

Thick contours: 990, 1000 and 1010 hPa of SLP | Magenta dot: cyclone centre

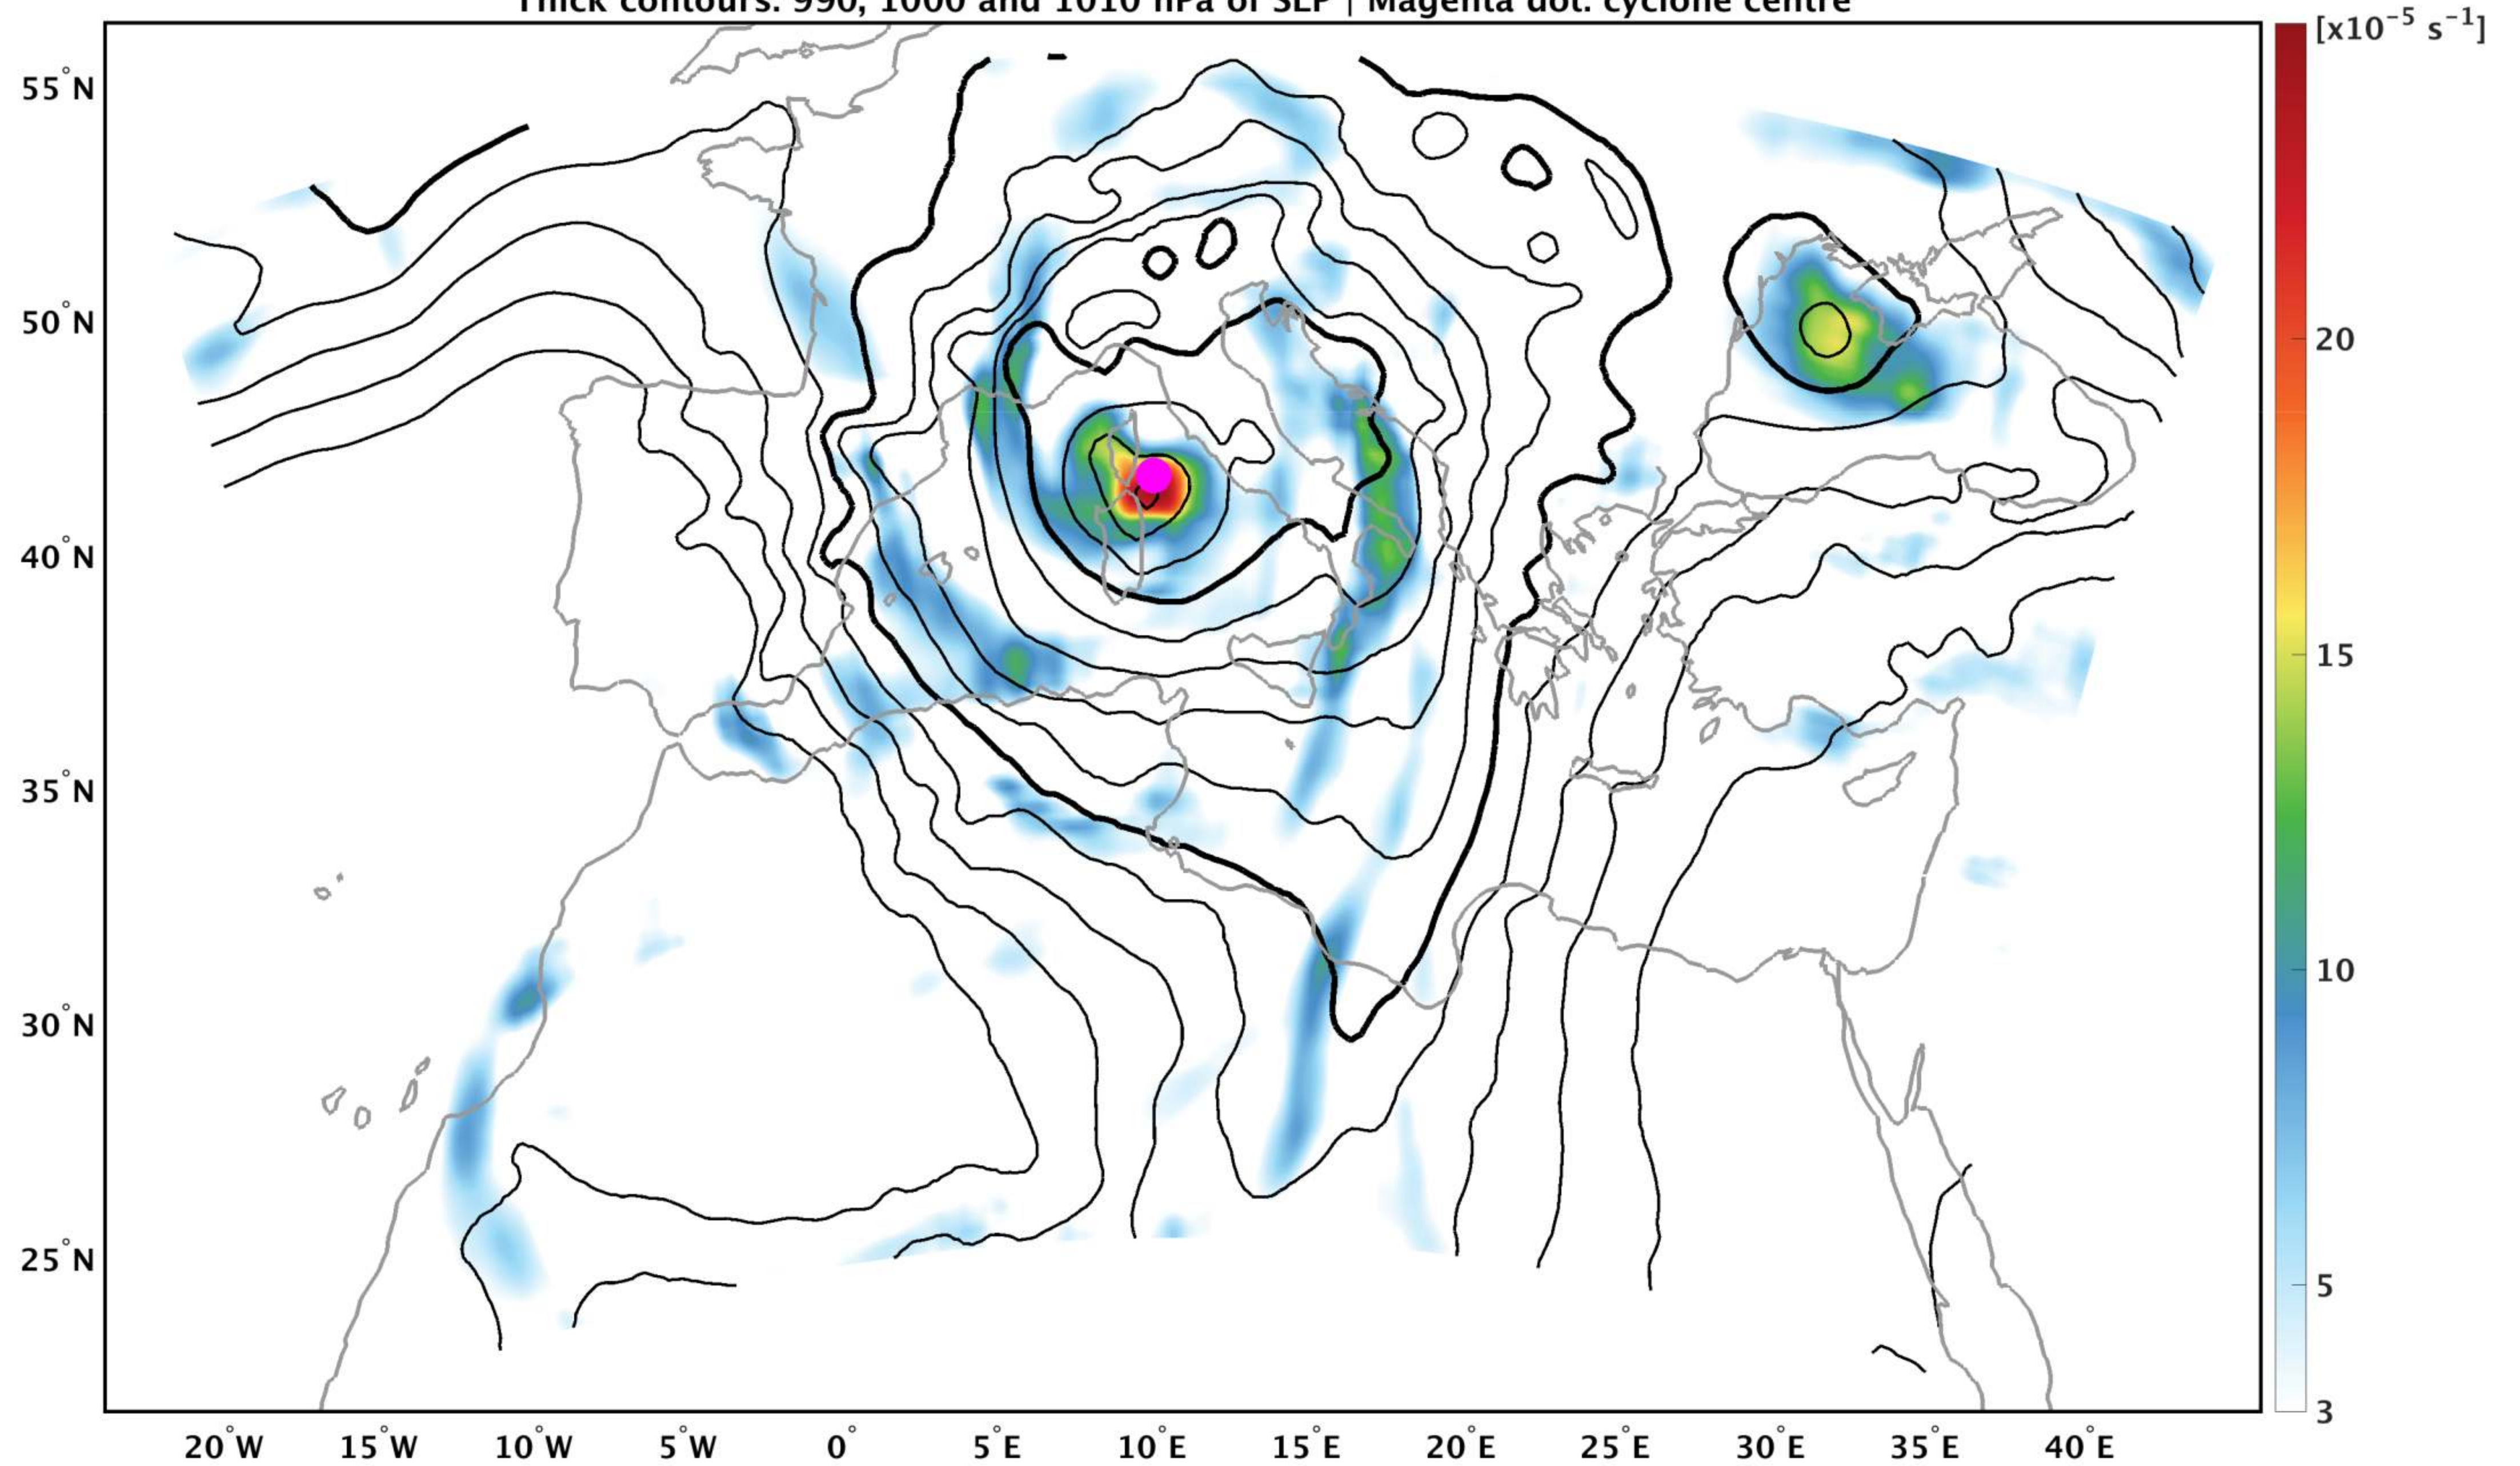



Case-66; Date: 25/4/2011

Colour: Relative vorticity ( $\times 10^{-5}$ ) | Contour: SLP (from 1018 hPa with an interval of 2 hPa)

Thick contours: 990, 1000 and 1010 hPa of SLP | Magenta dot: cyclone centre

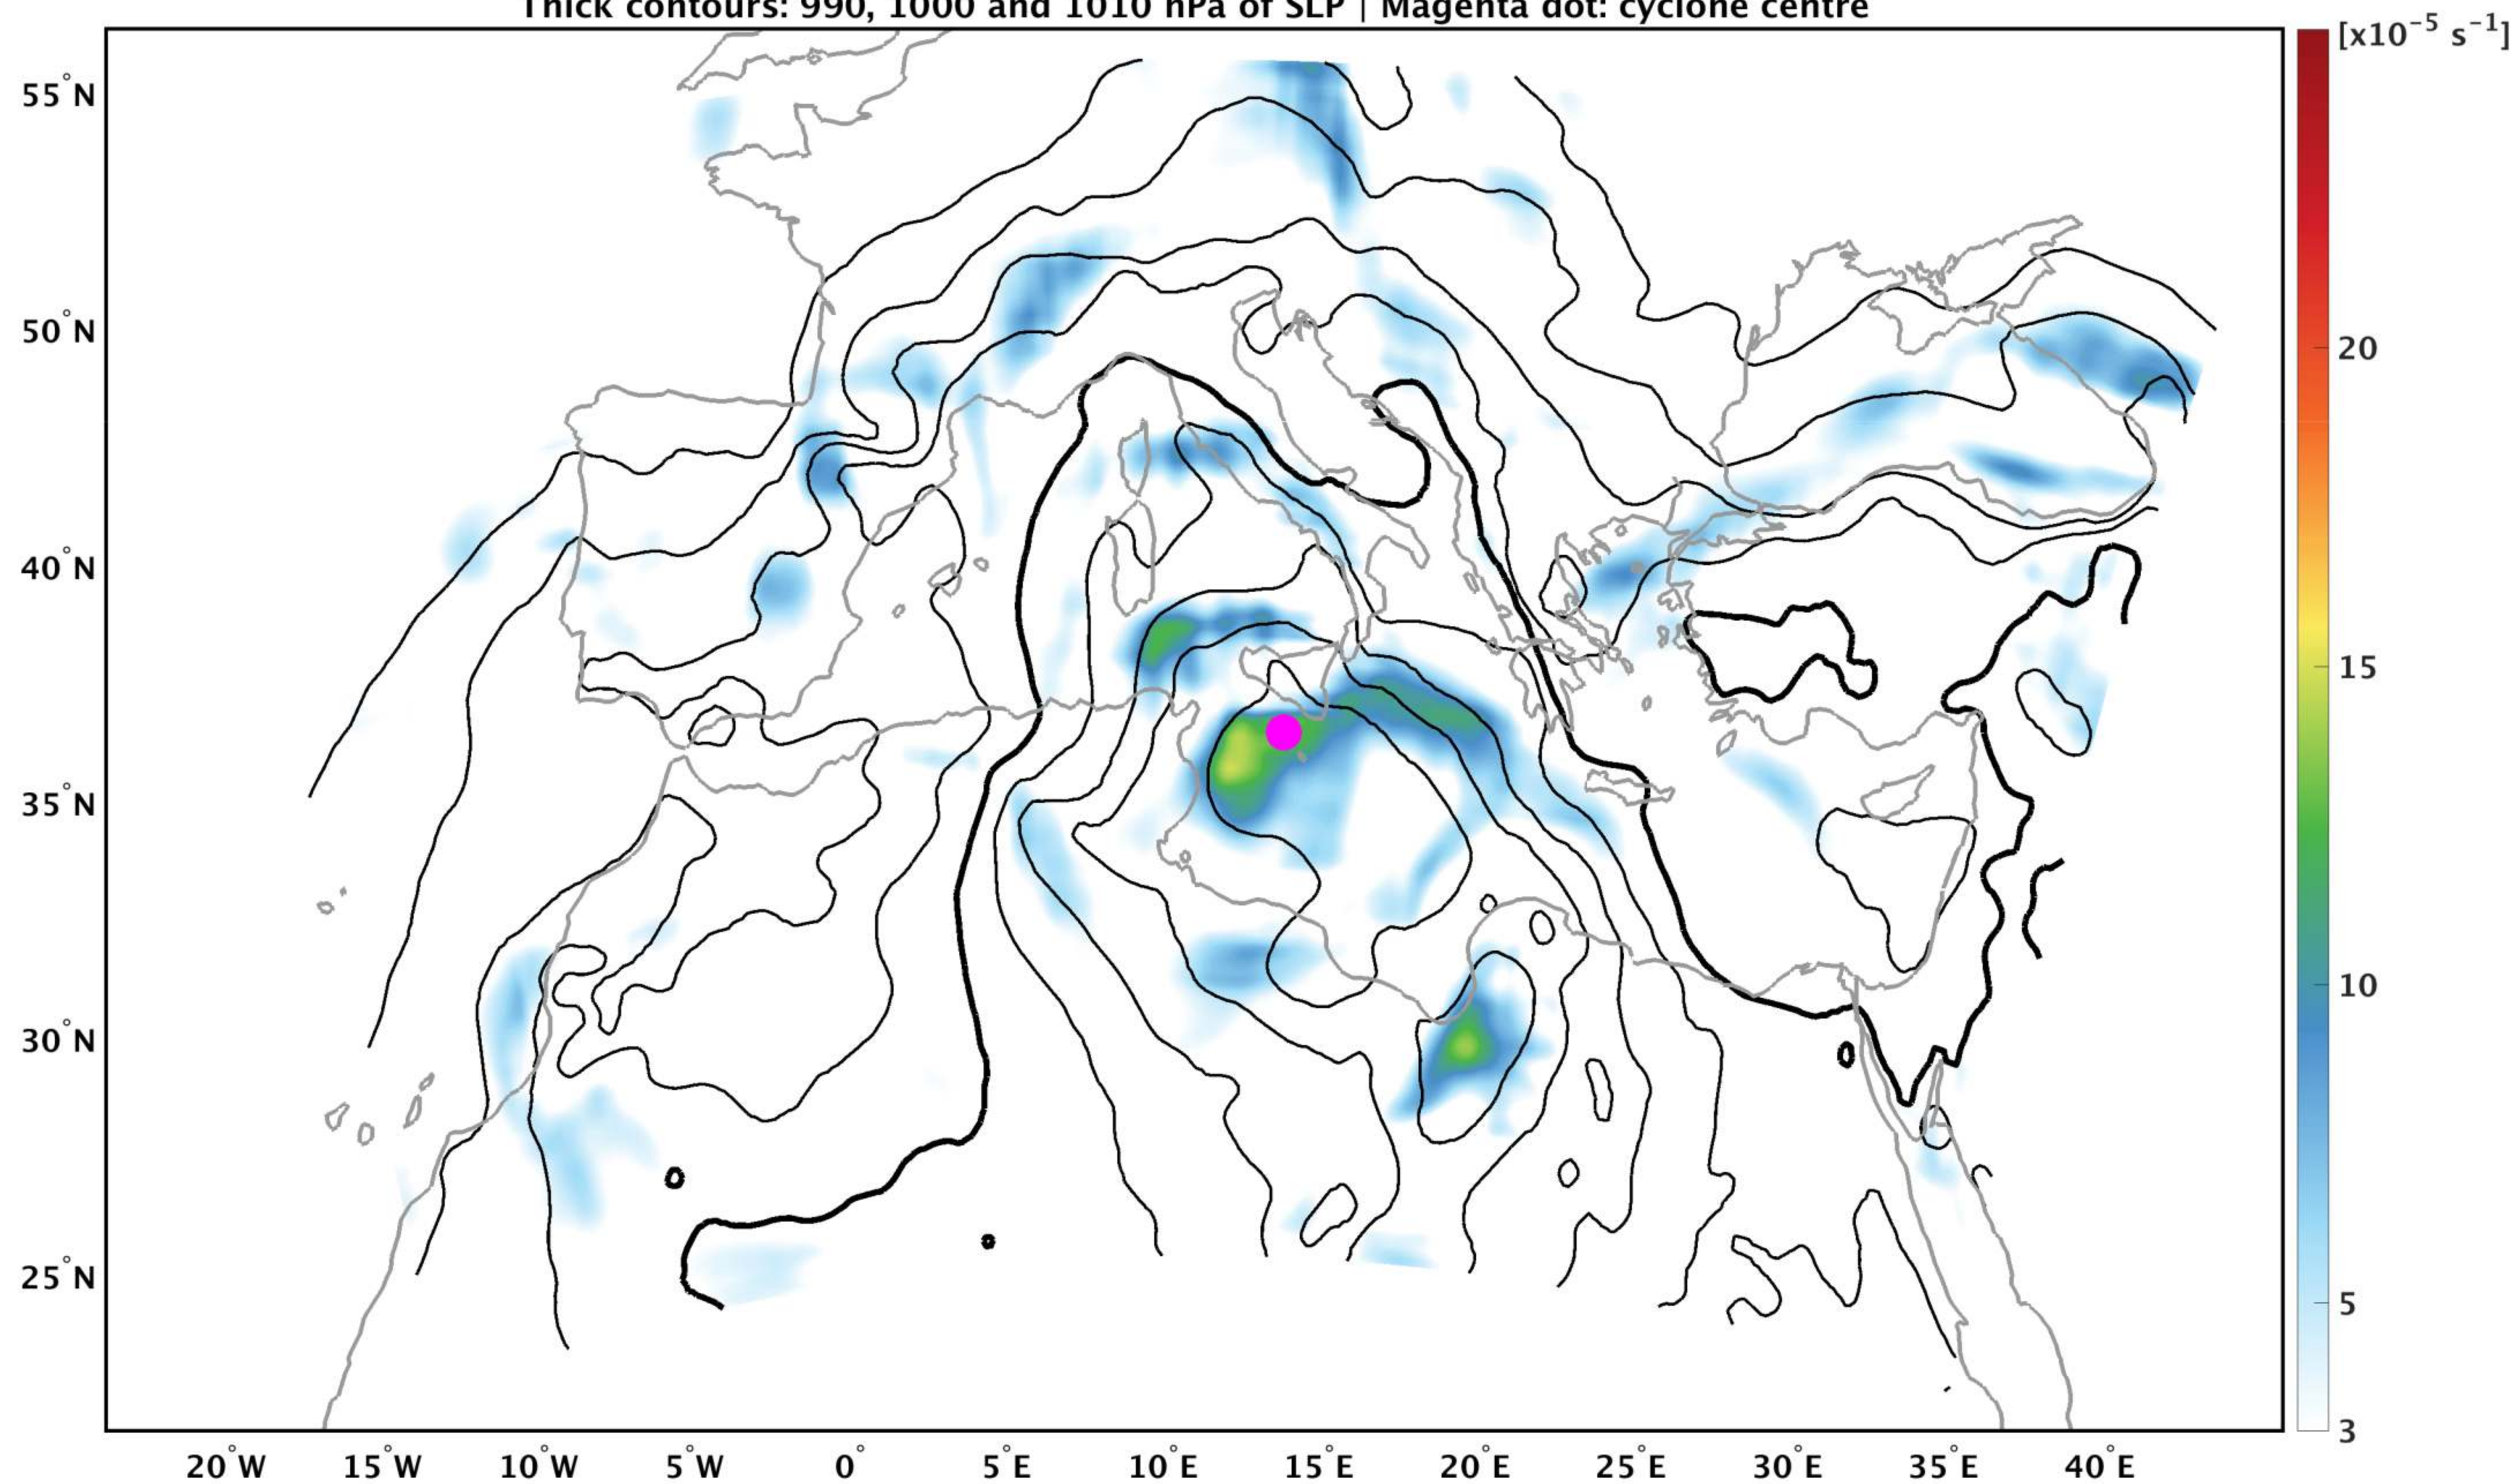



Case-67; Date: 25/2/2017

Colour: Relative vorticity ( $\times 10^{-5}$ ) | Contour: SLP (from 1018 hPa with an interval of 2 hPa)

Thick contours: 990, 1000 and 1010 hPa of SLP | Magenta dot: cyclone centre

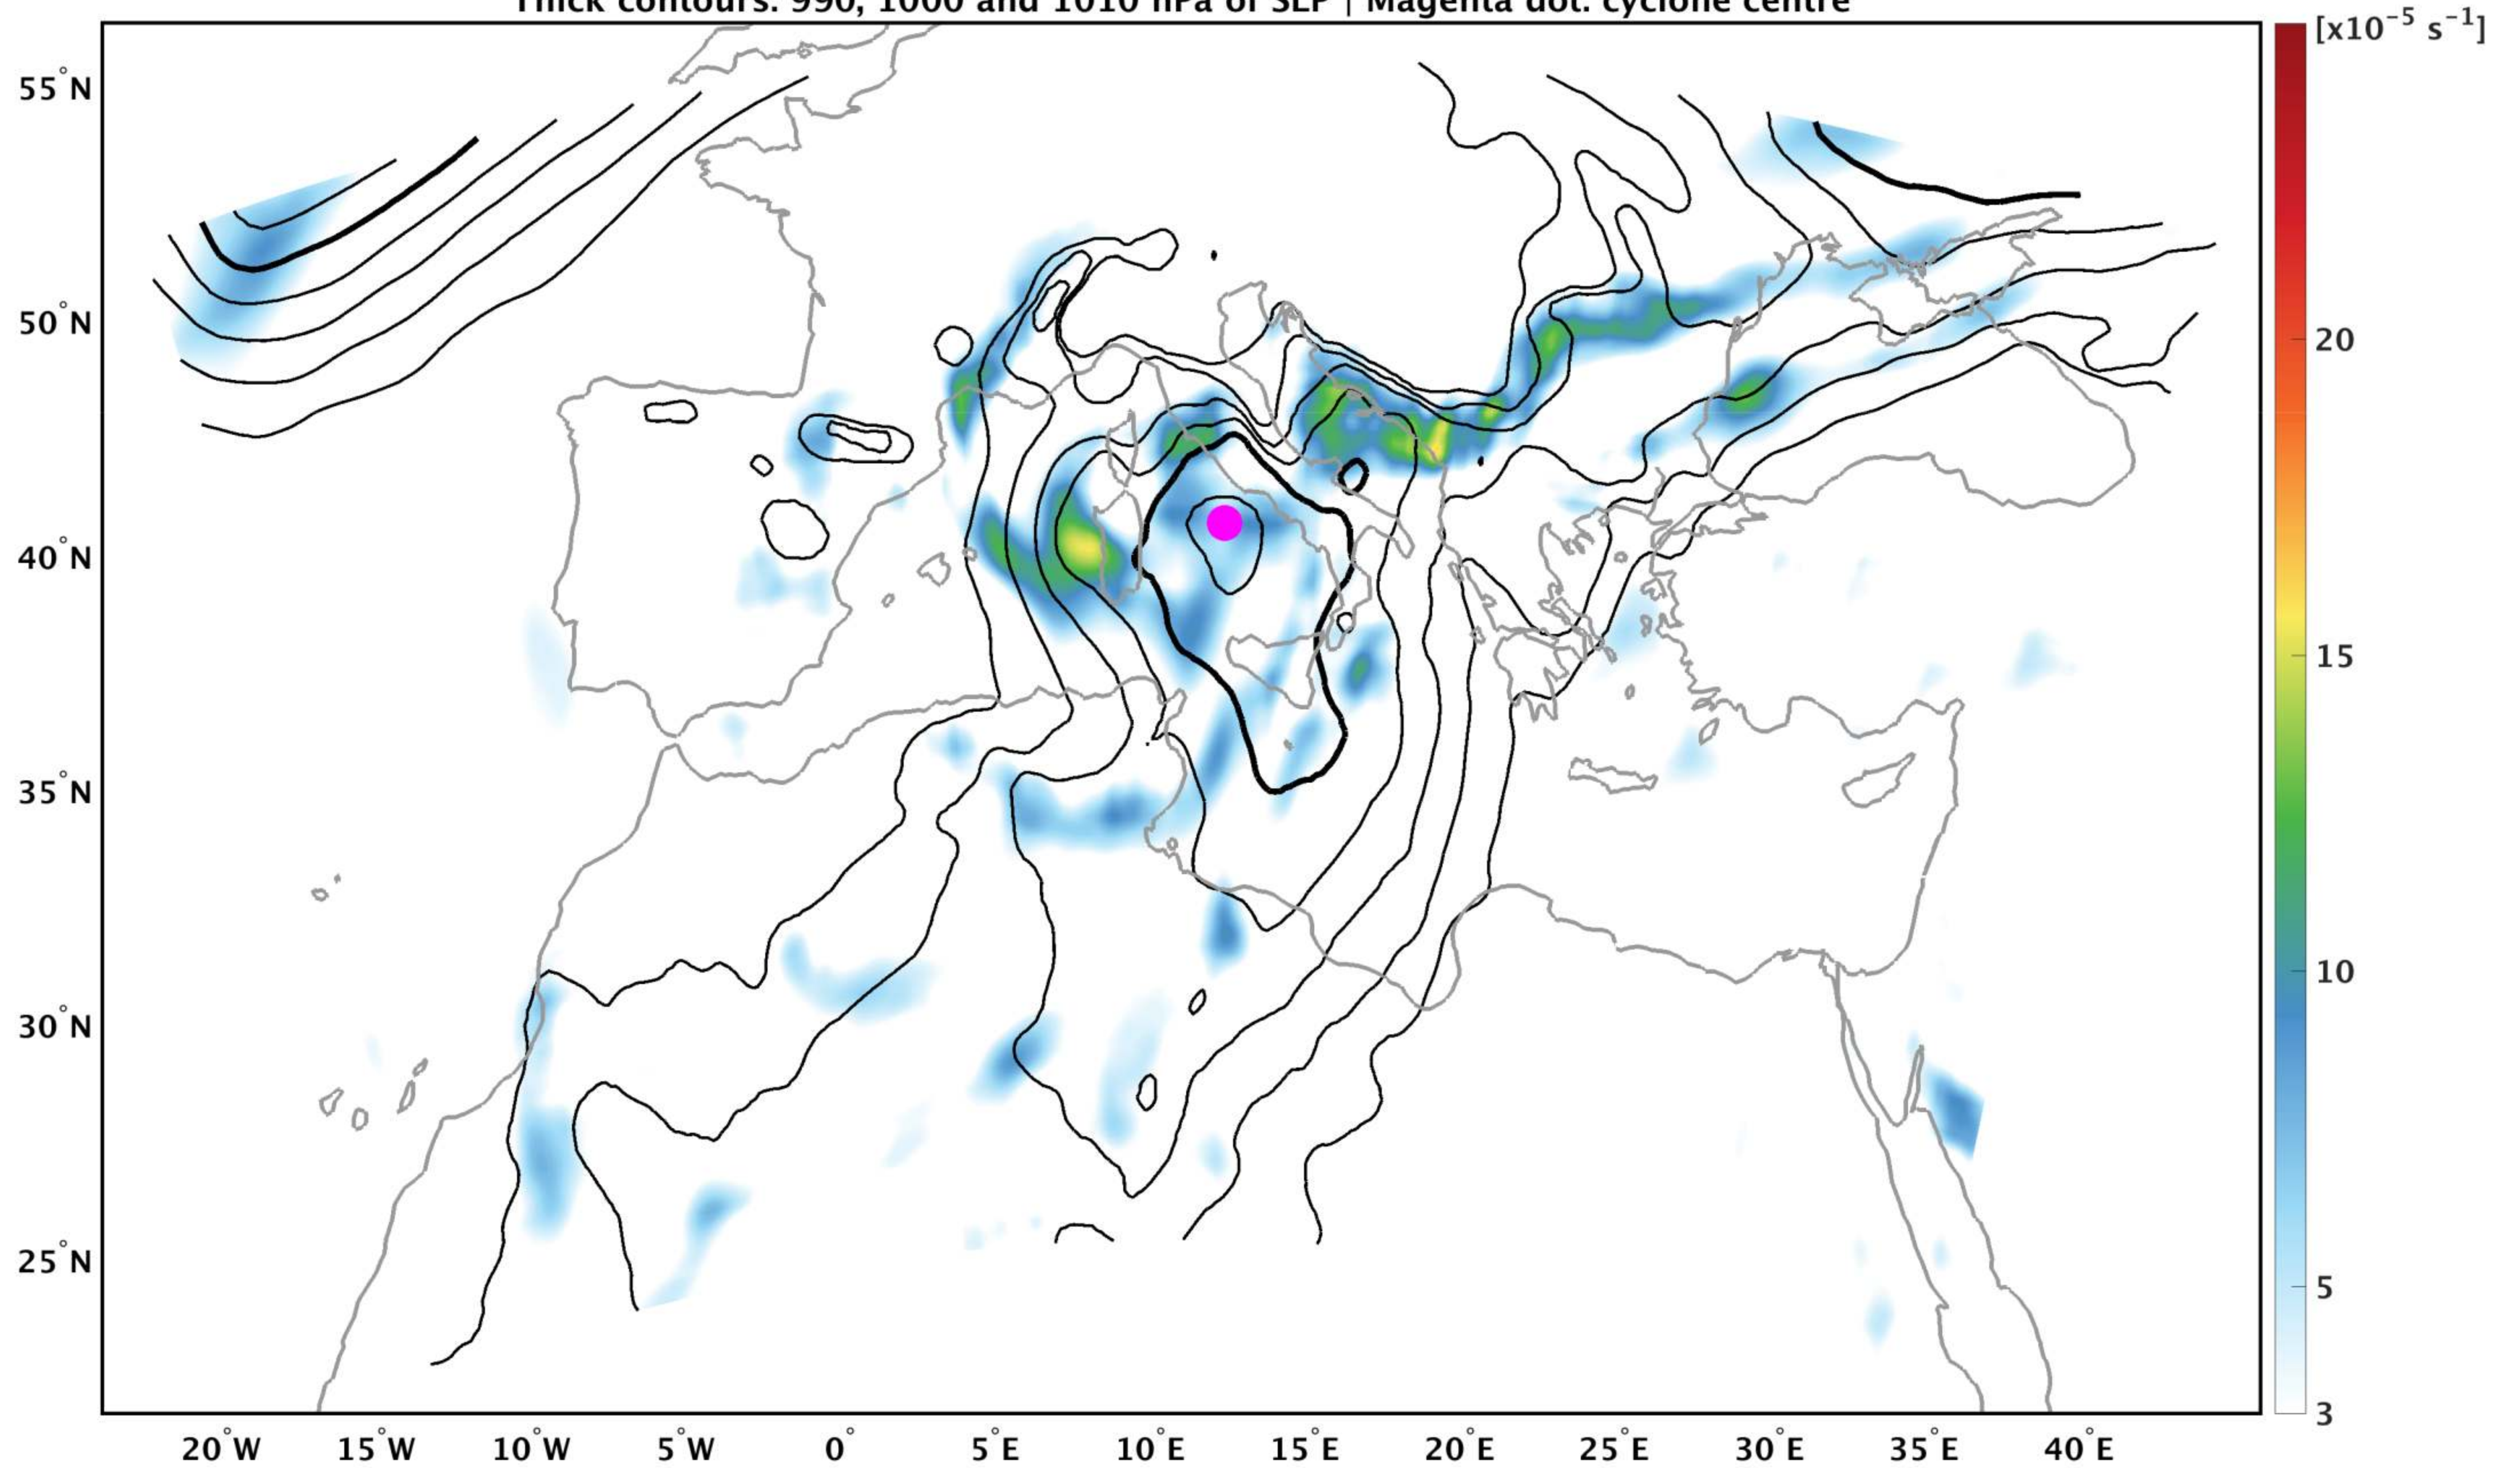



Case-68; Date: 13/1/2010

Colour: Relative vorticity ( $\times 10^{-5}$ ) | Contour: SLP (from 1018 hPa with an interval of 2 hPa)

Thick contours: 990, 1000 and 1010 hPa of SLP | Magenta dot: cyclone centre

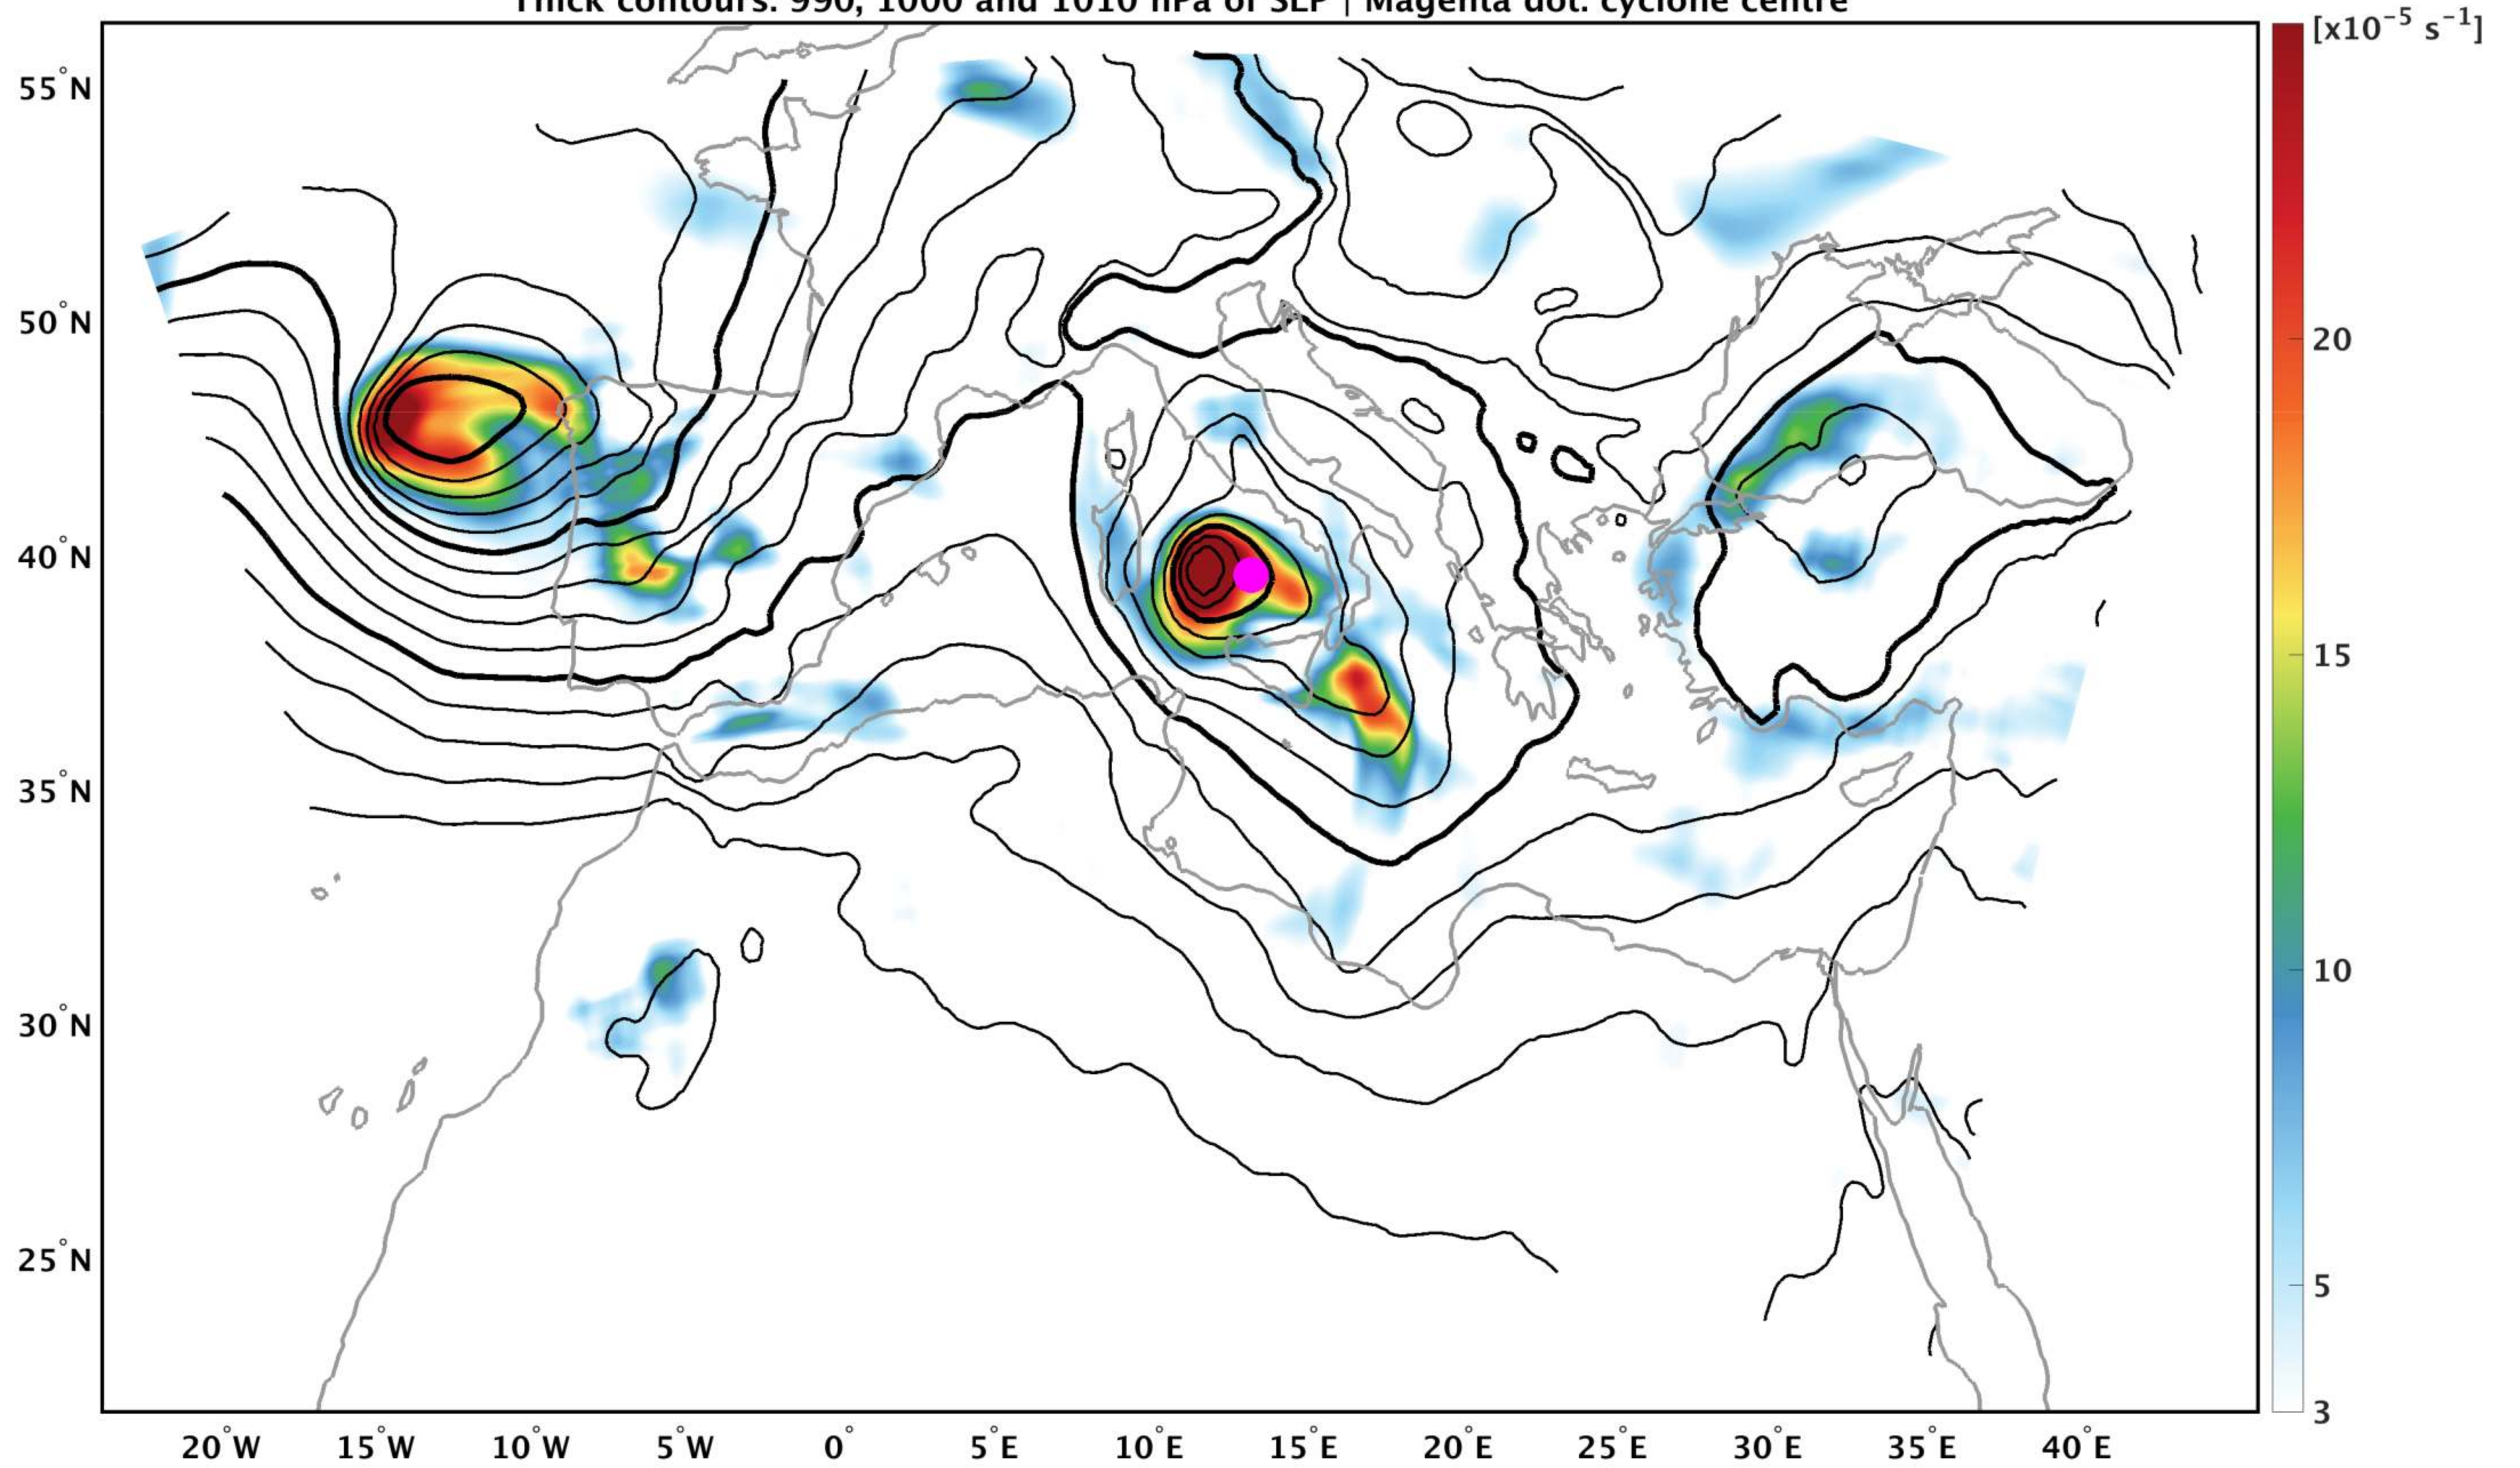



Case-69; Date: 20/1/2014

Colour: Relative vorticity ( $\times 10^{-5}$ ) | Contour: SLP (from 1018 hPa with an interval of 2 hPa)

Thick contours: 990, 1000 and 1010 hPa of SLP | Magenta dot: cyclone centre

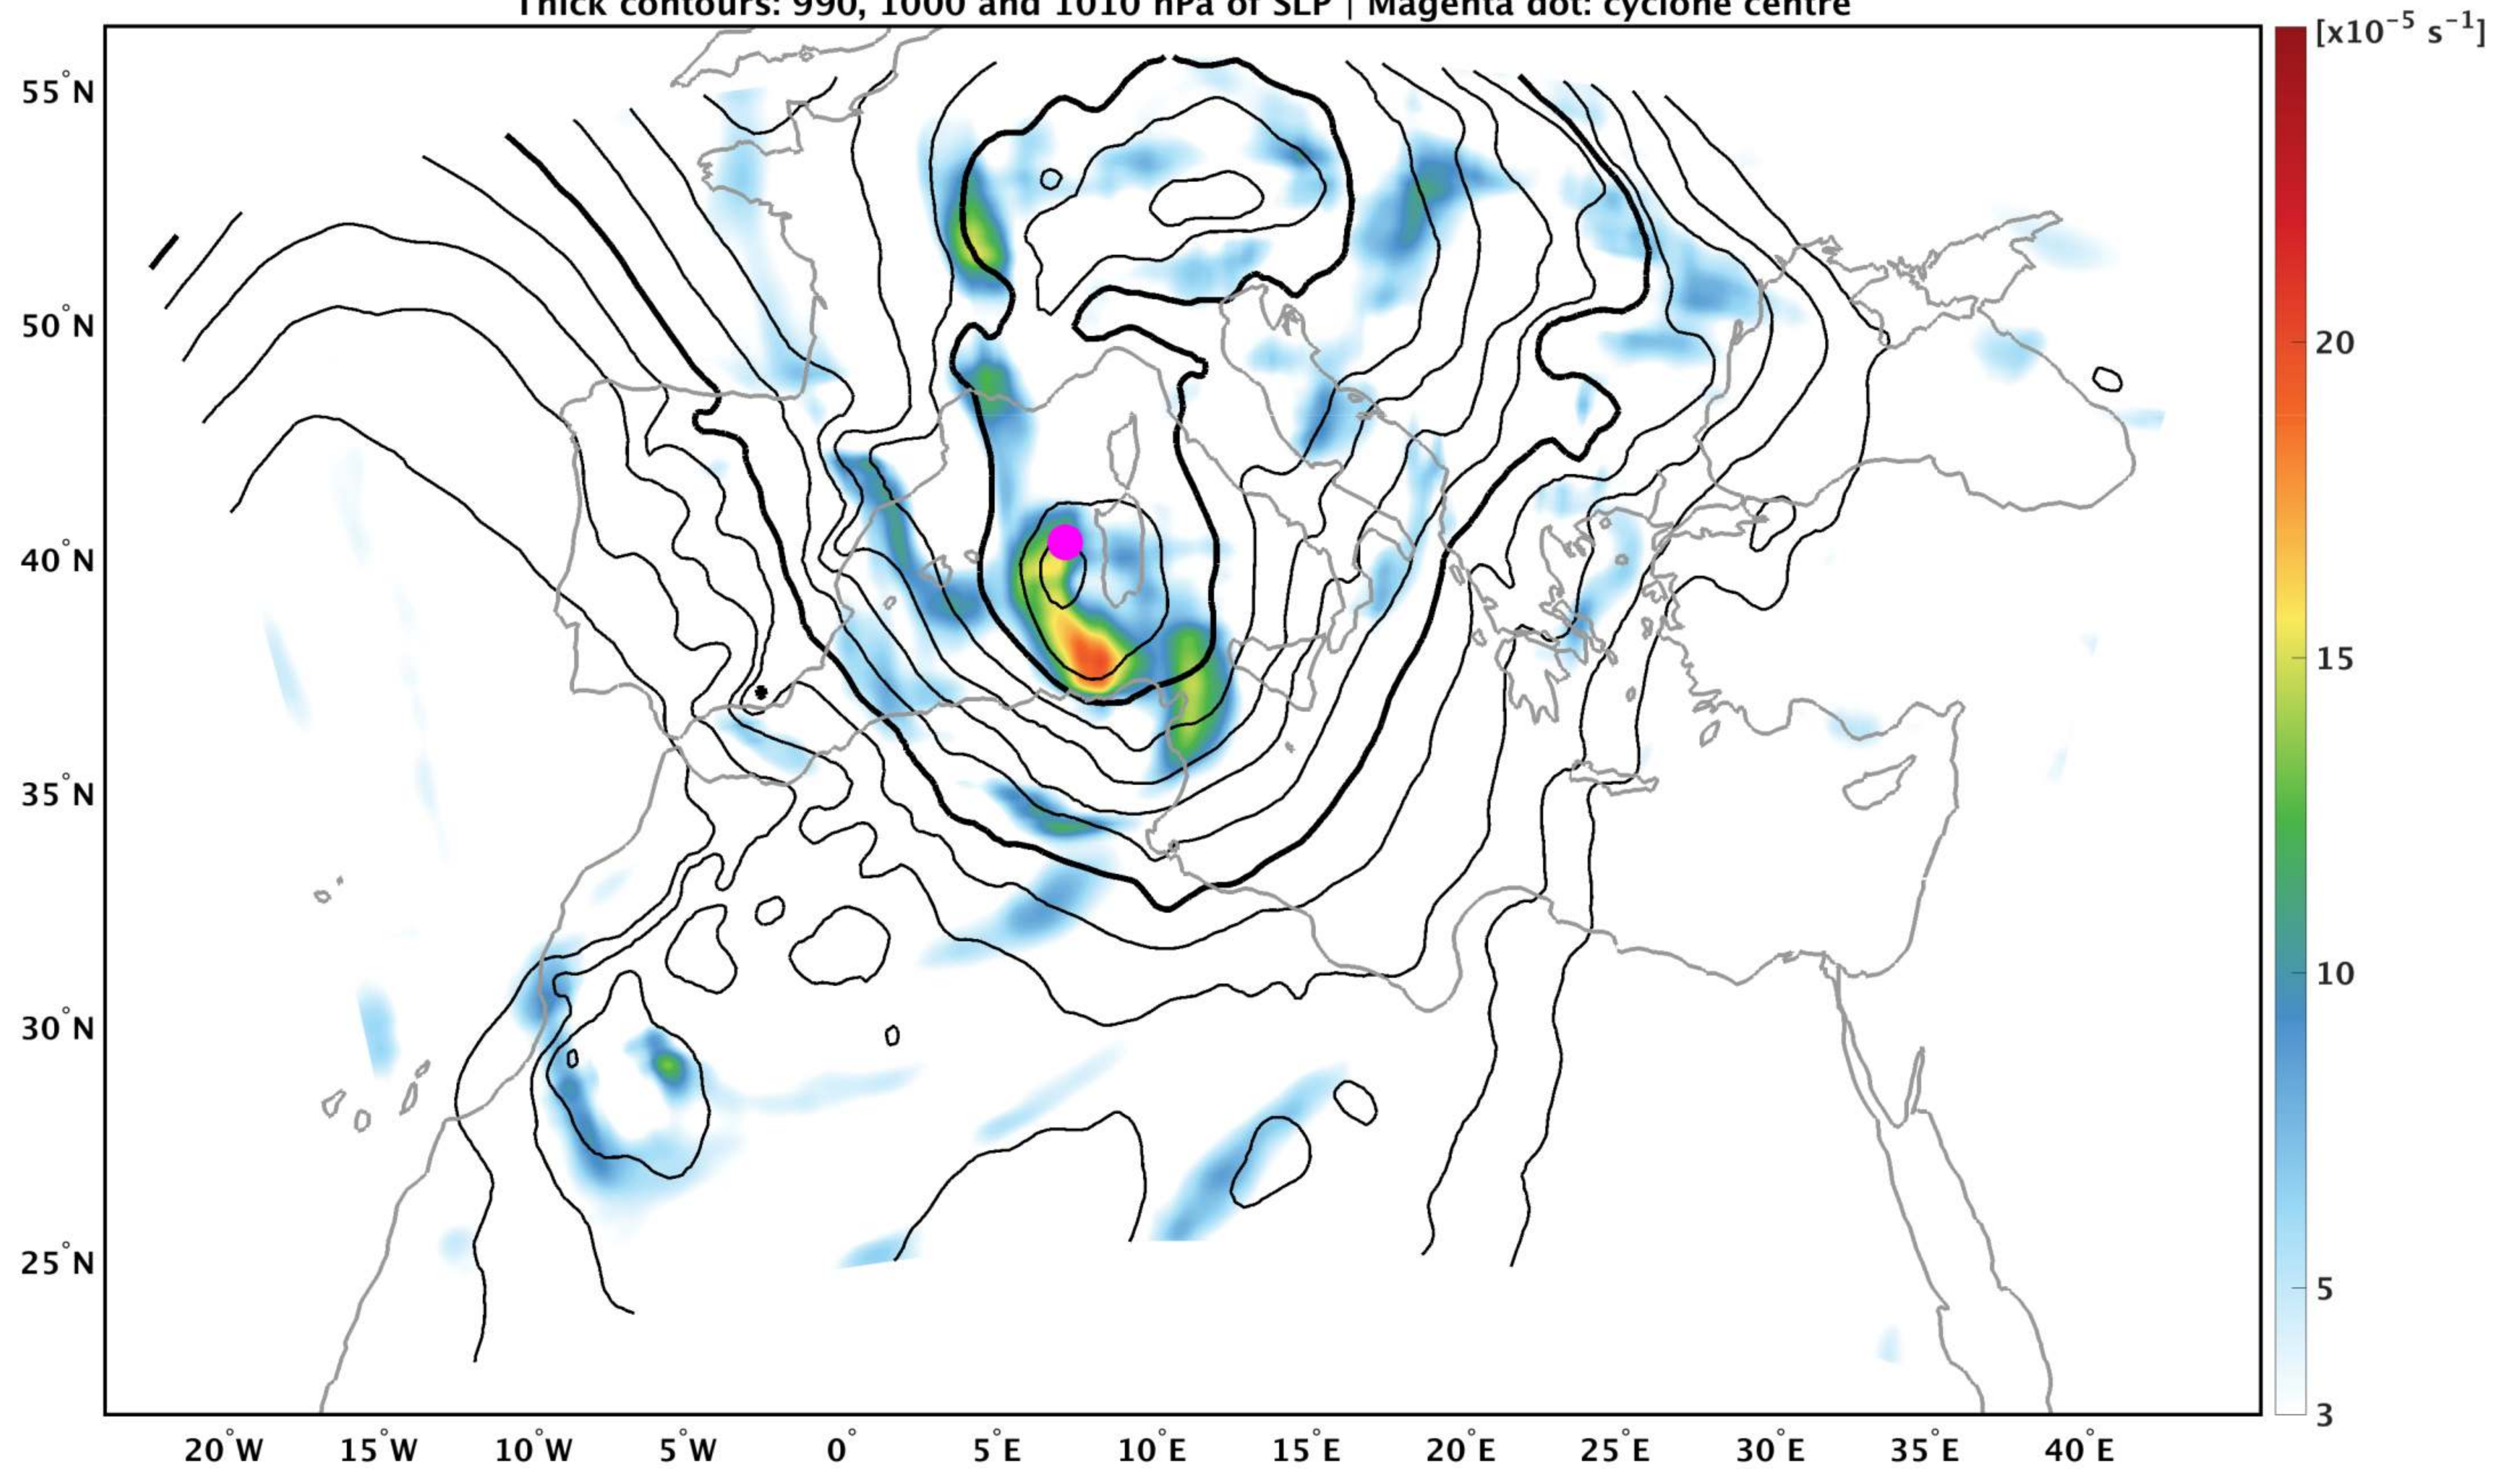



Case-70; Date: 16/3/2011

Colour: Relative vorticity ( $\times 10^{-5}$ ) | Contour: SLP (from 1018 hPa with an interval of 2 hPa)

Thick contours: 990, 1000 and 1010 hPa of SLP | Magenta dot: cyclone centre

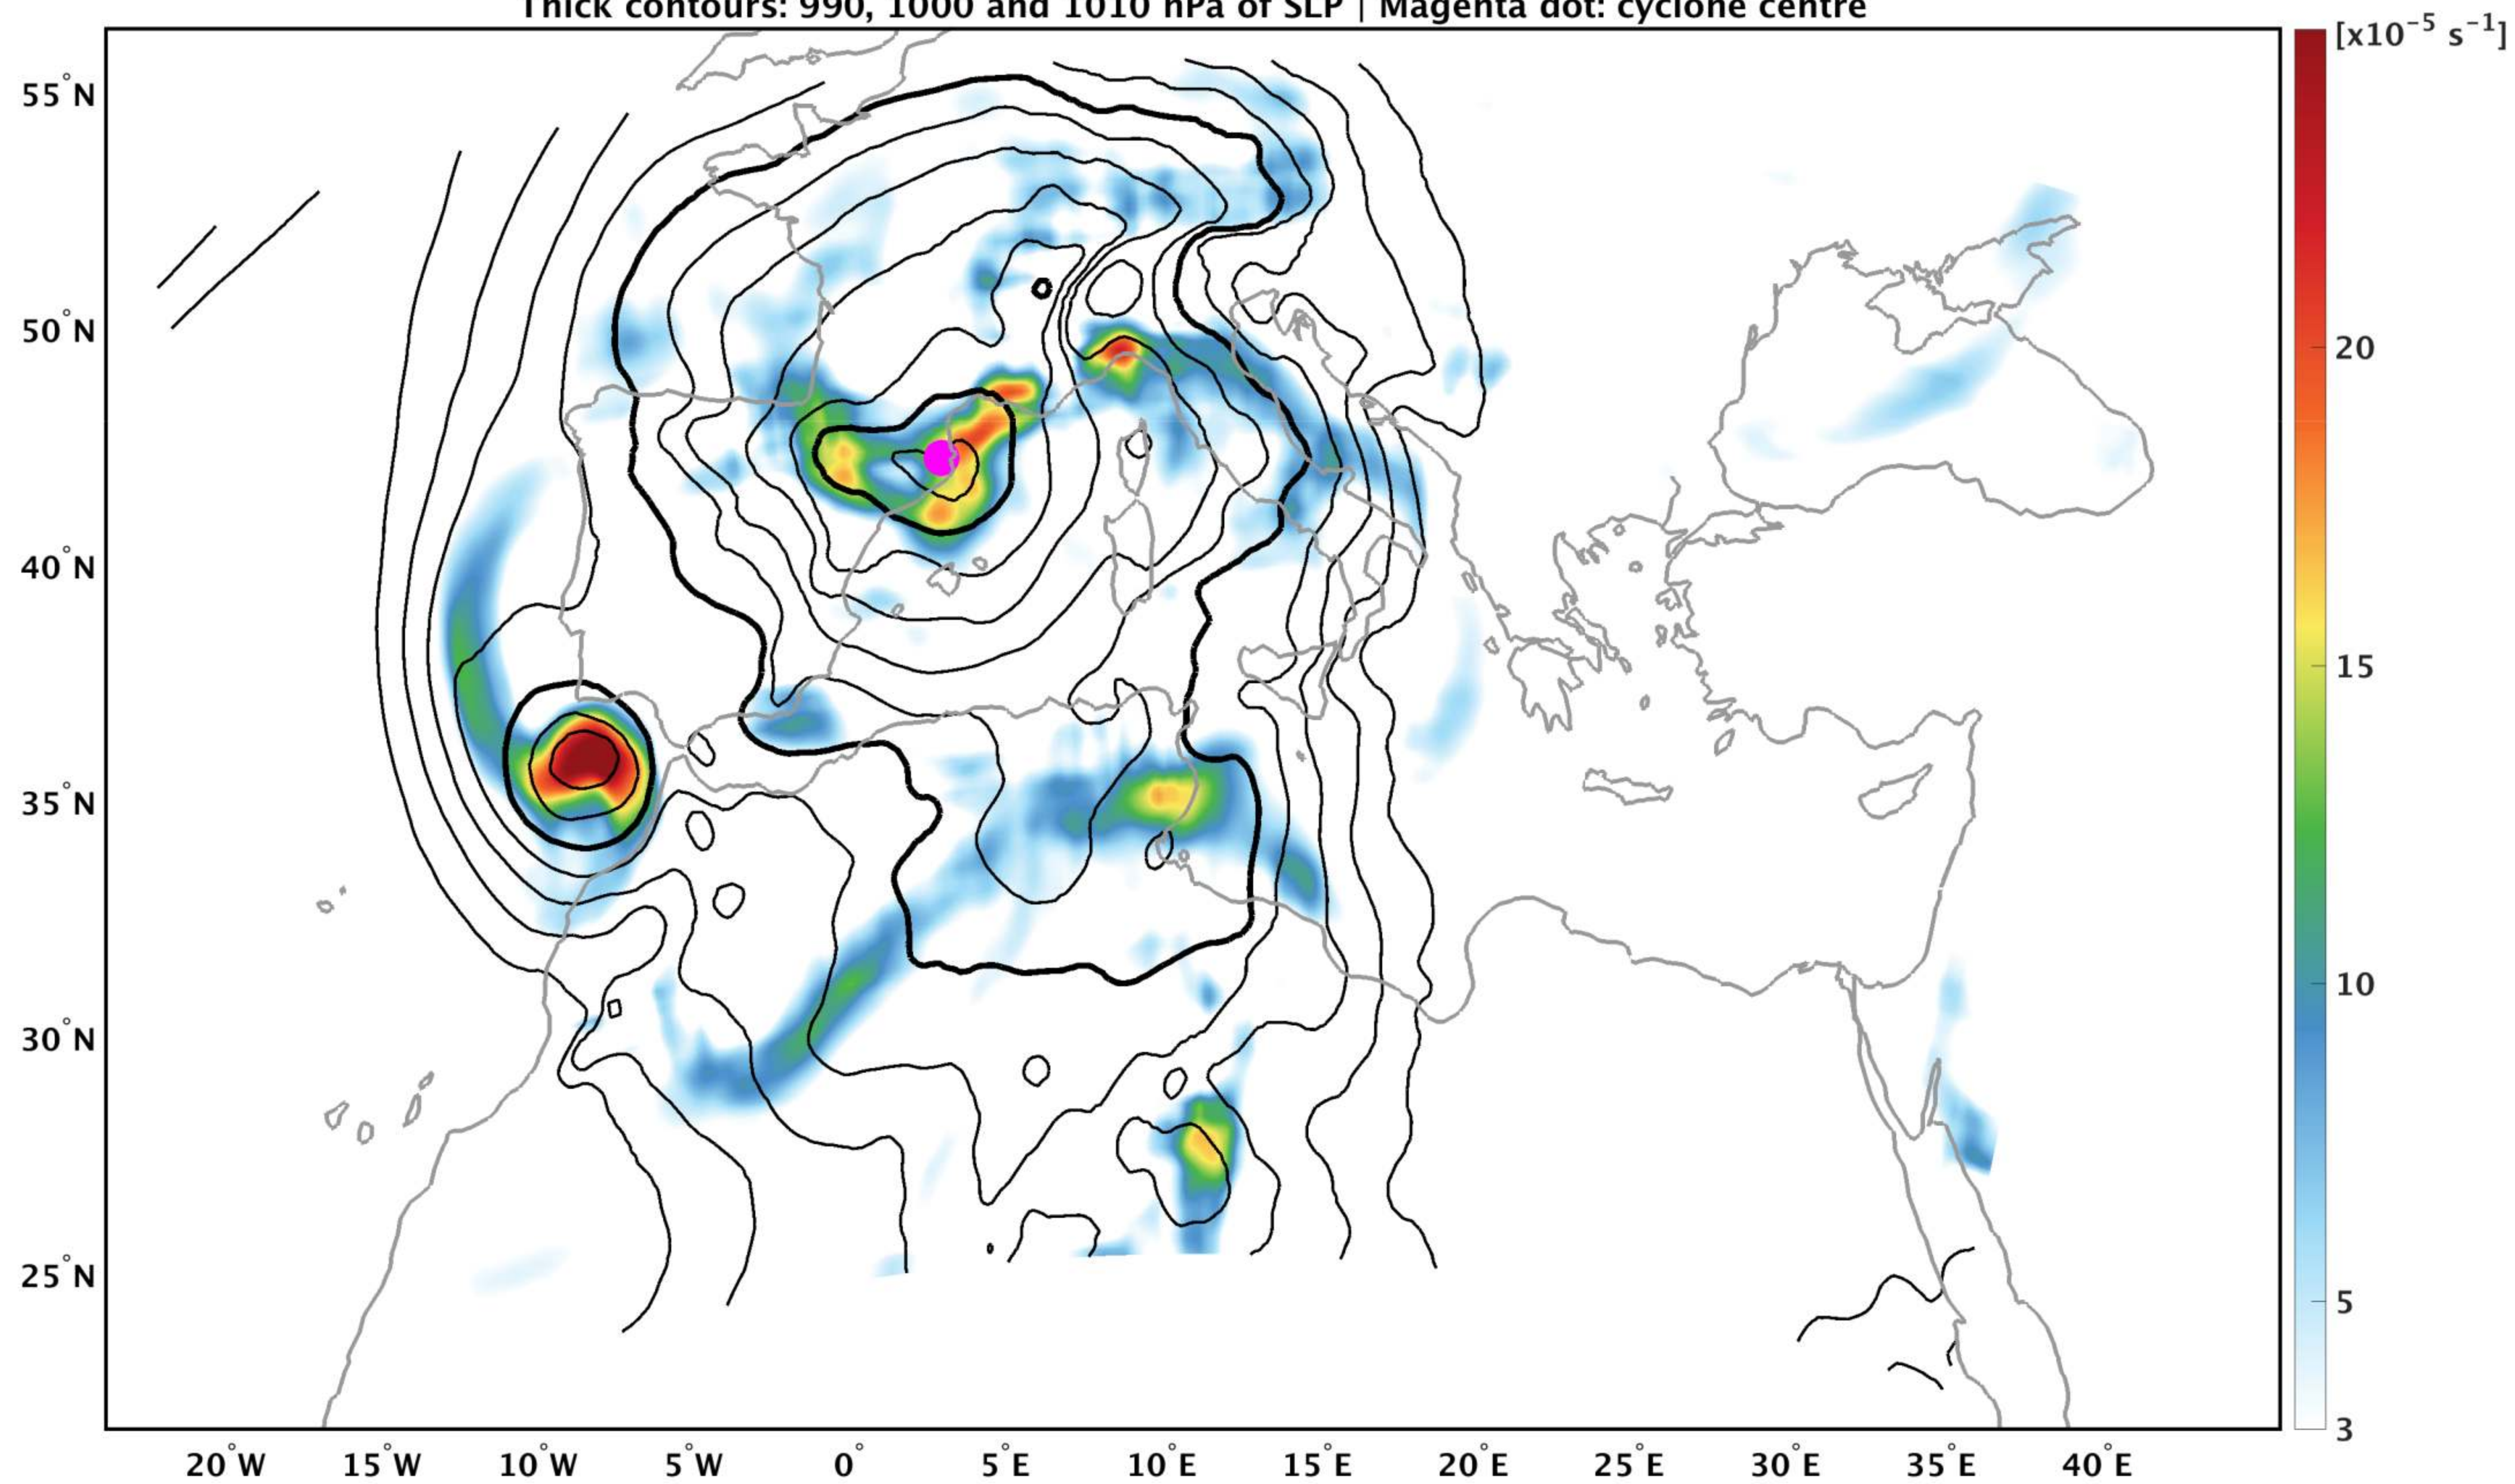



Case-71; Date: 21/6/2009

Colour: Relative vorticity ( $\times 10^{-5}$ ) | Contour: SLP (from 1018 hPa with an interval of 2 hPa)

Thick contours: 990, 1000 and 1010 hPa of SLP | Magenta dot: cyclone centre

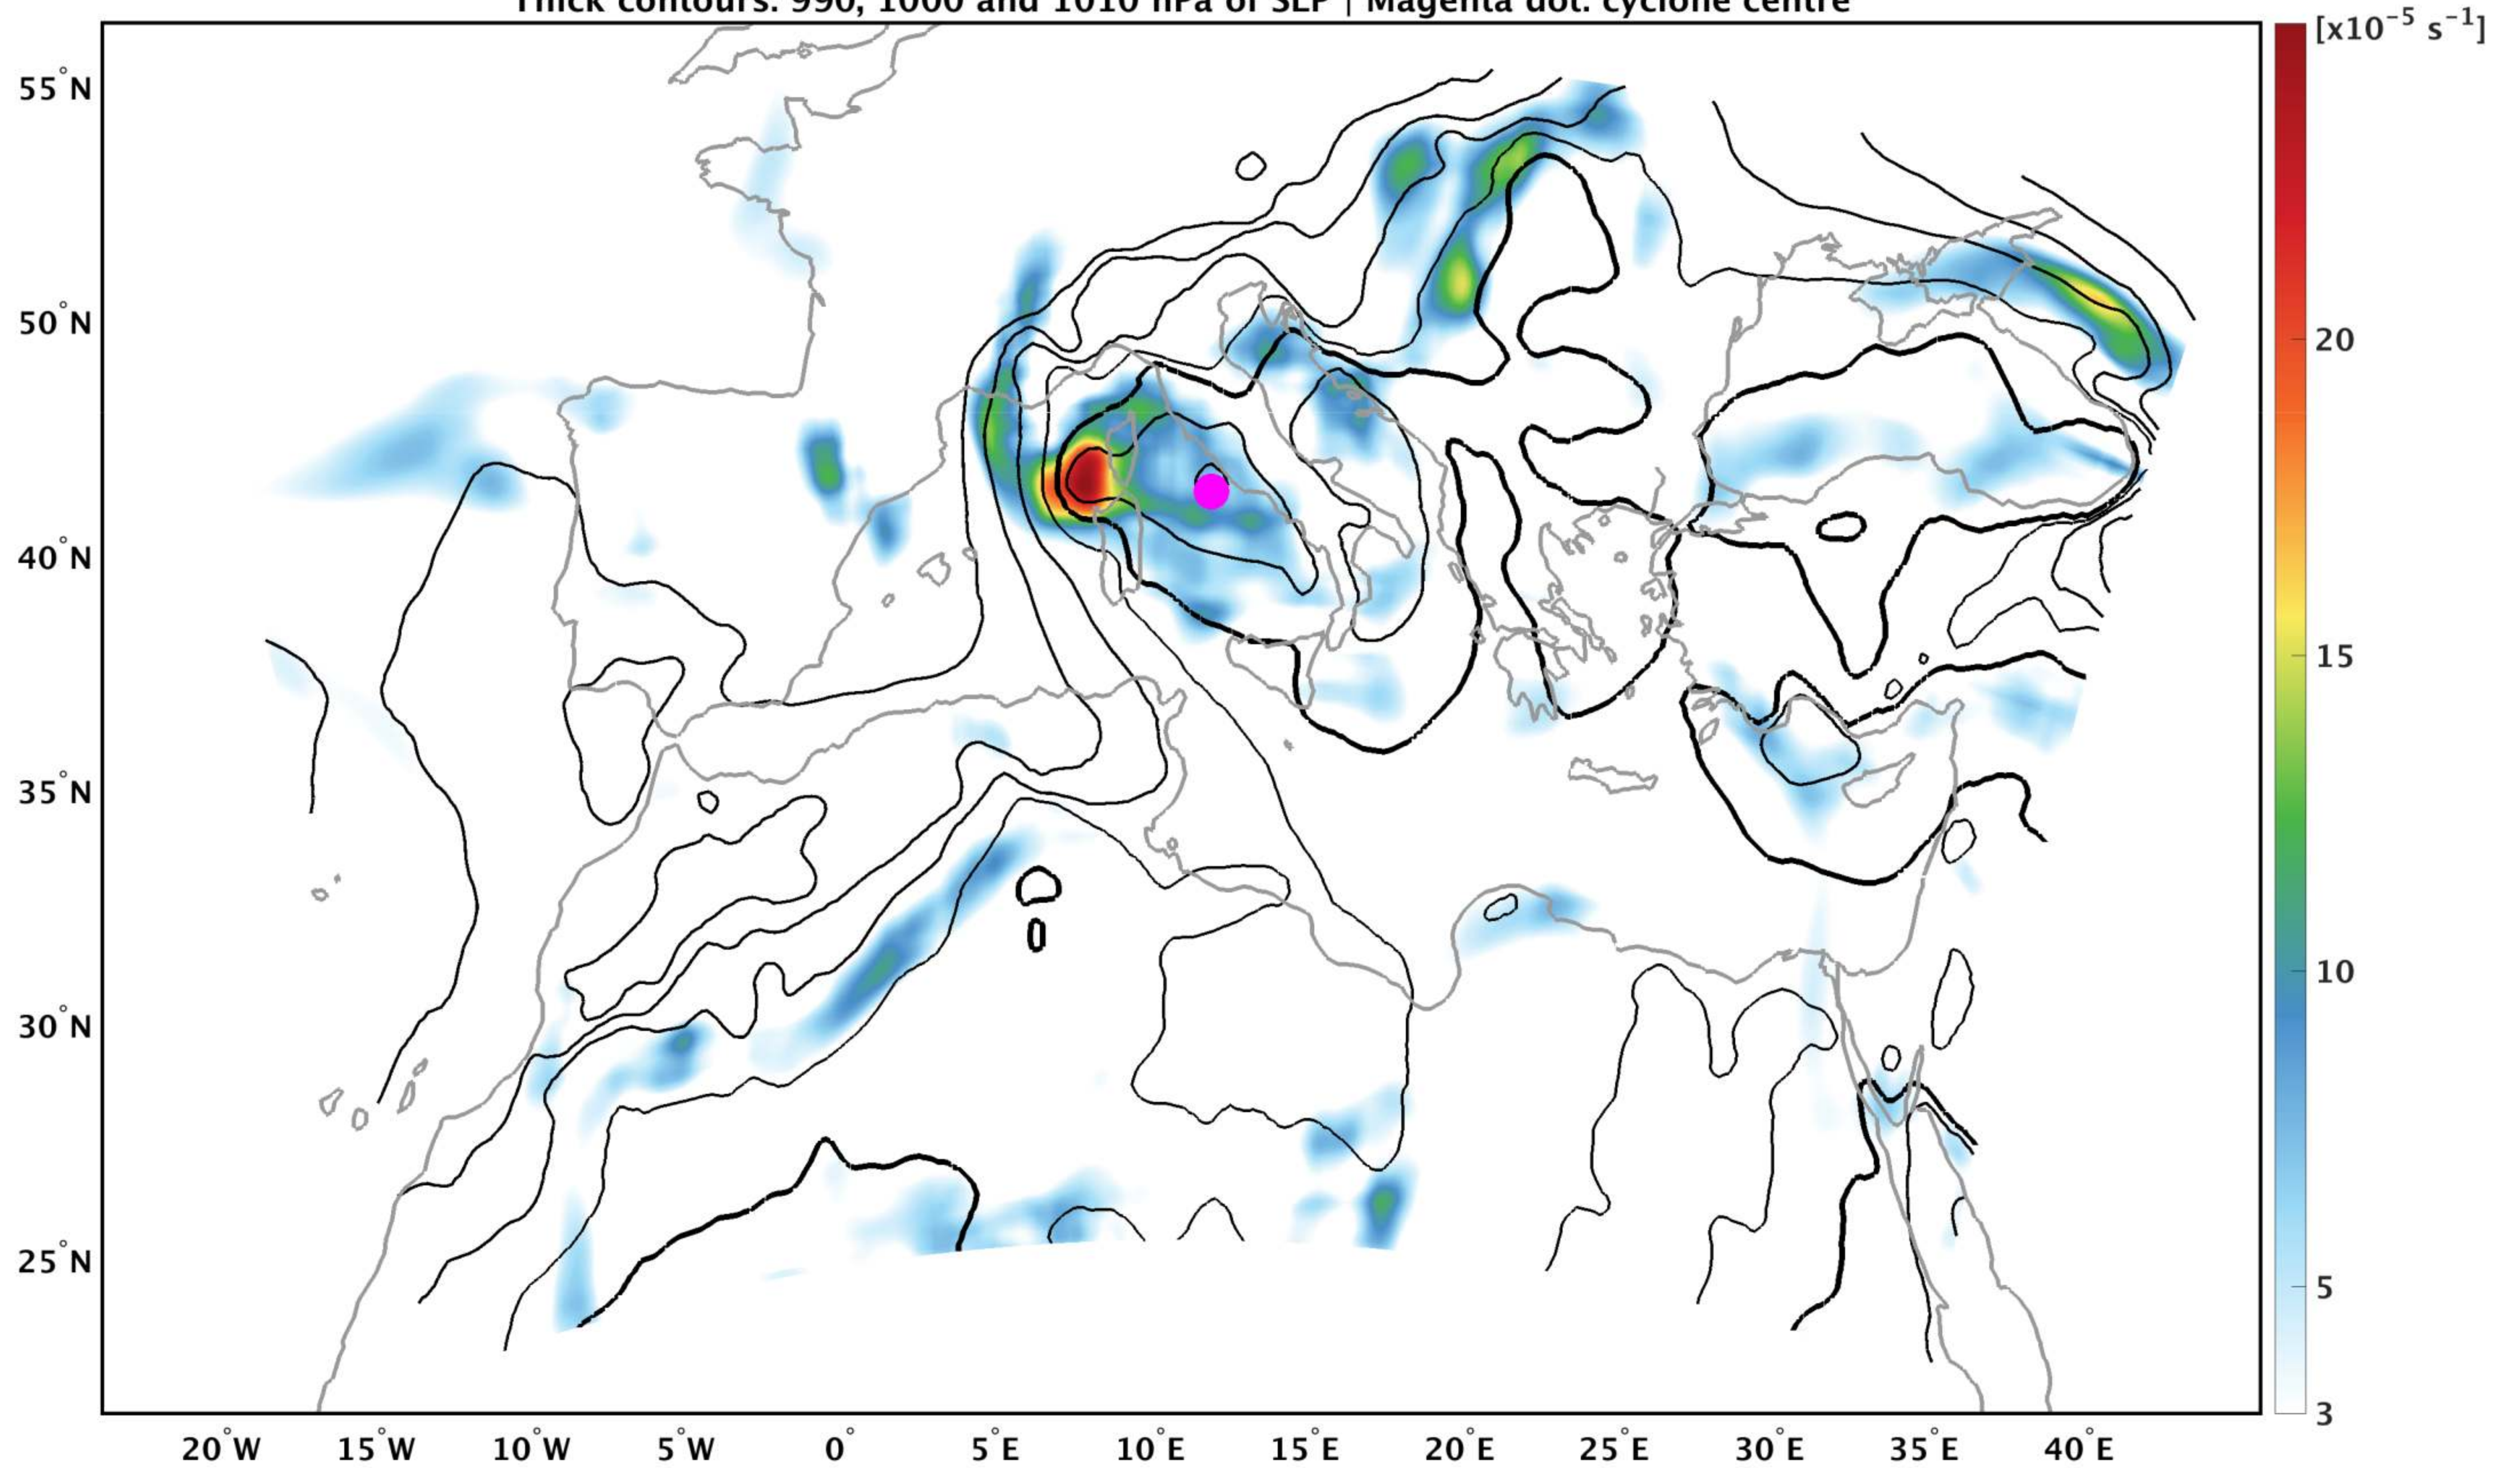



Case-72; Date: 5/4/2014

Colour: Relative vorticity ( $\times 10^{-5}$ ) | Contour: SLP (from 1018 hPa with an interval of 2 hPa)

Thick contours: 990, 1000 and 1010 hPa of SLP | Magenta dot: cyclone centre

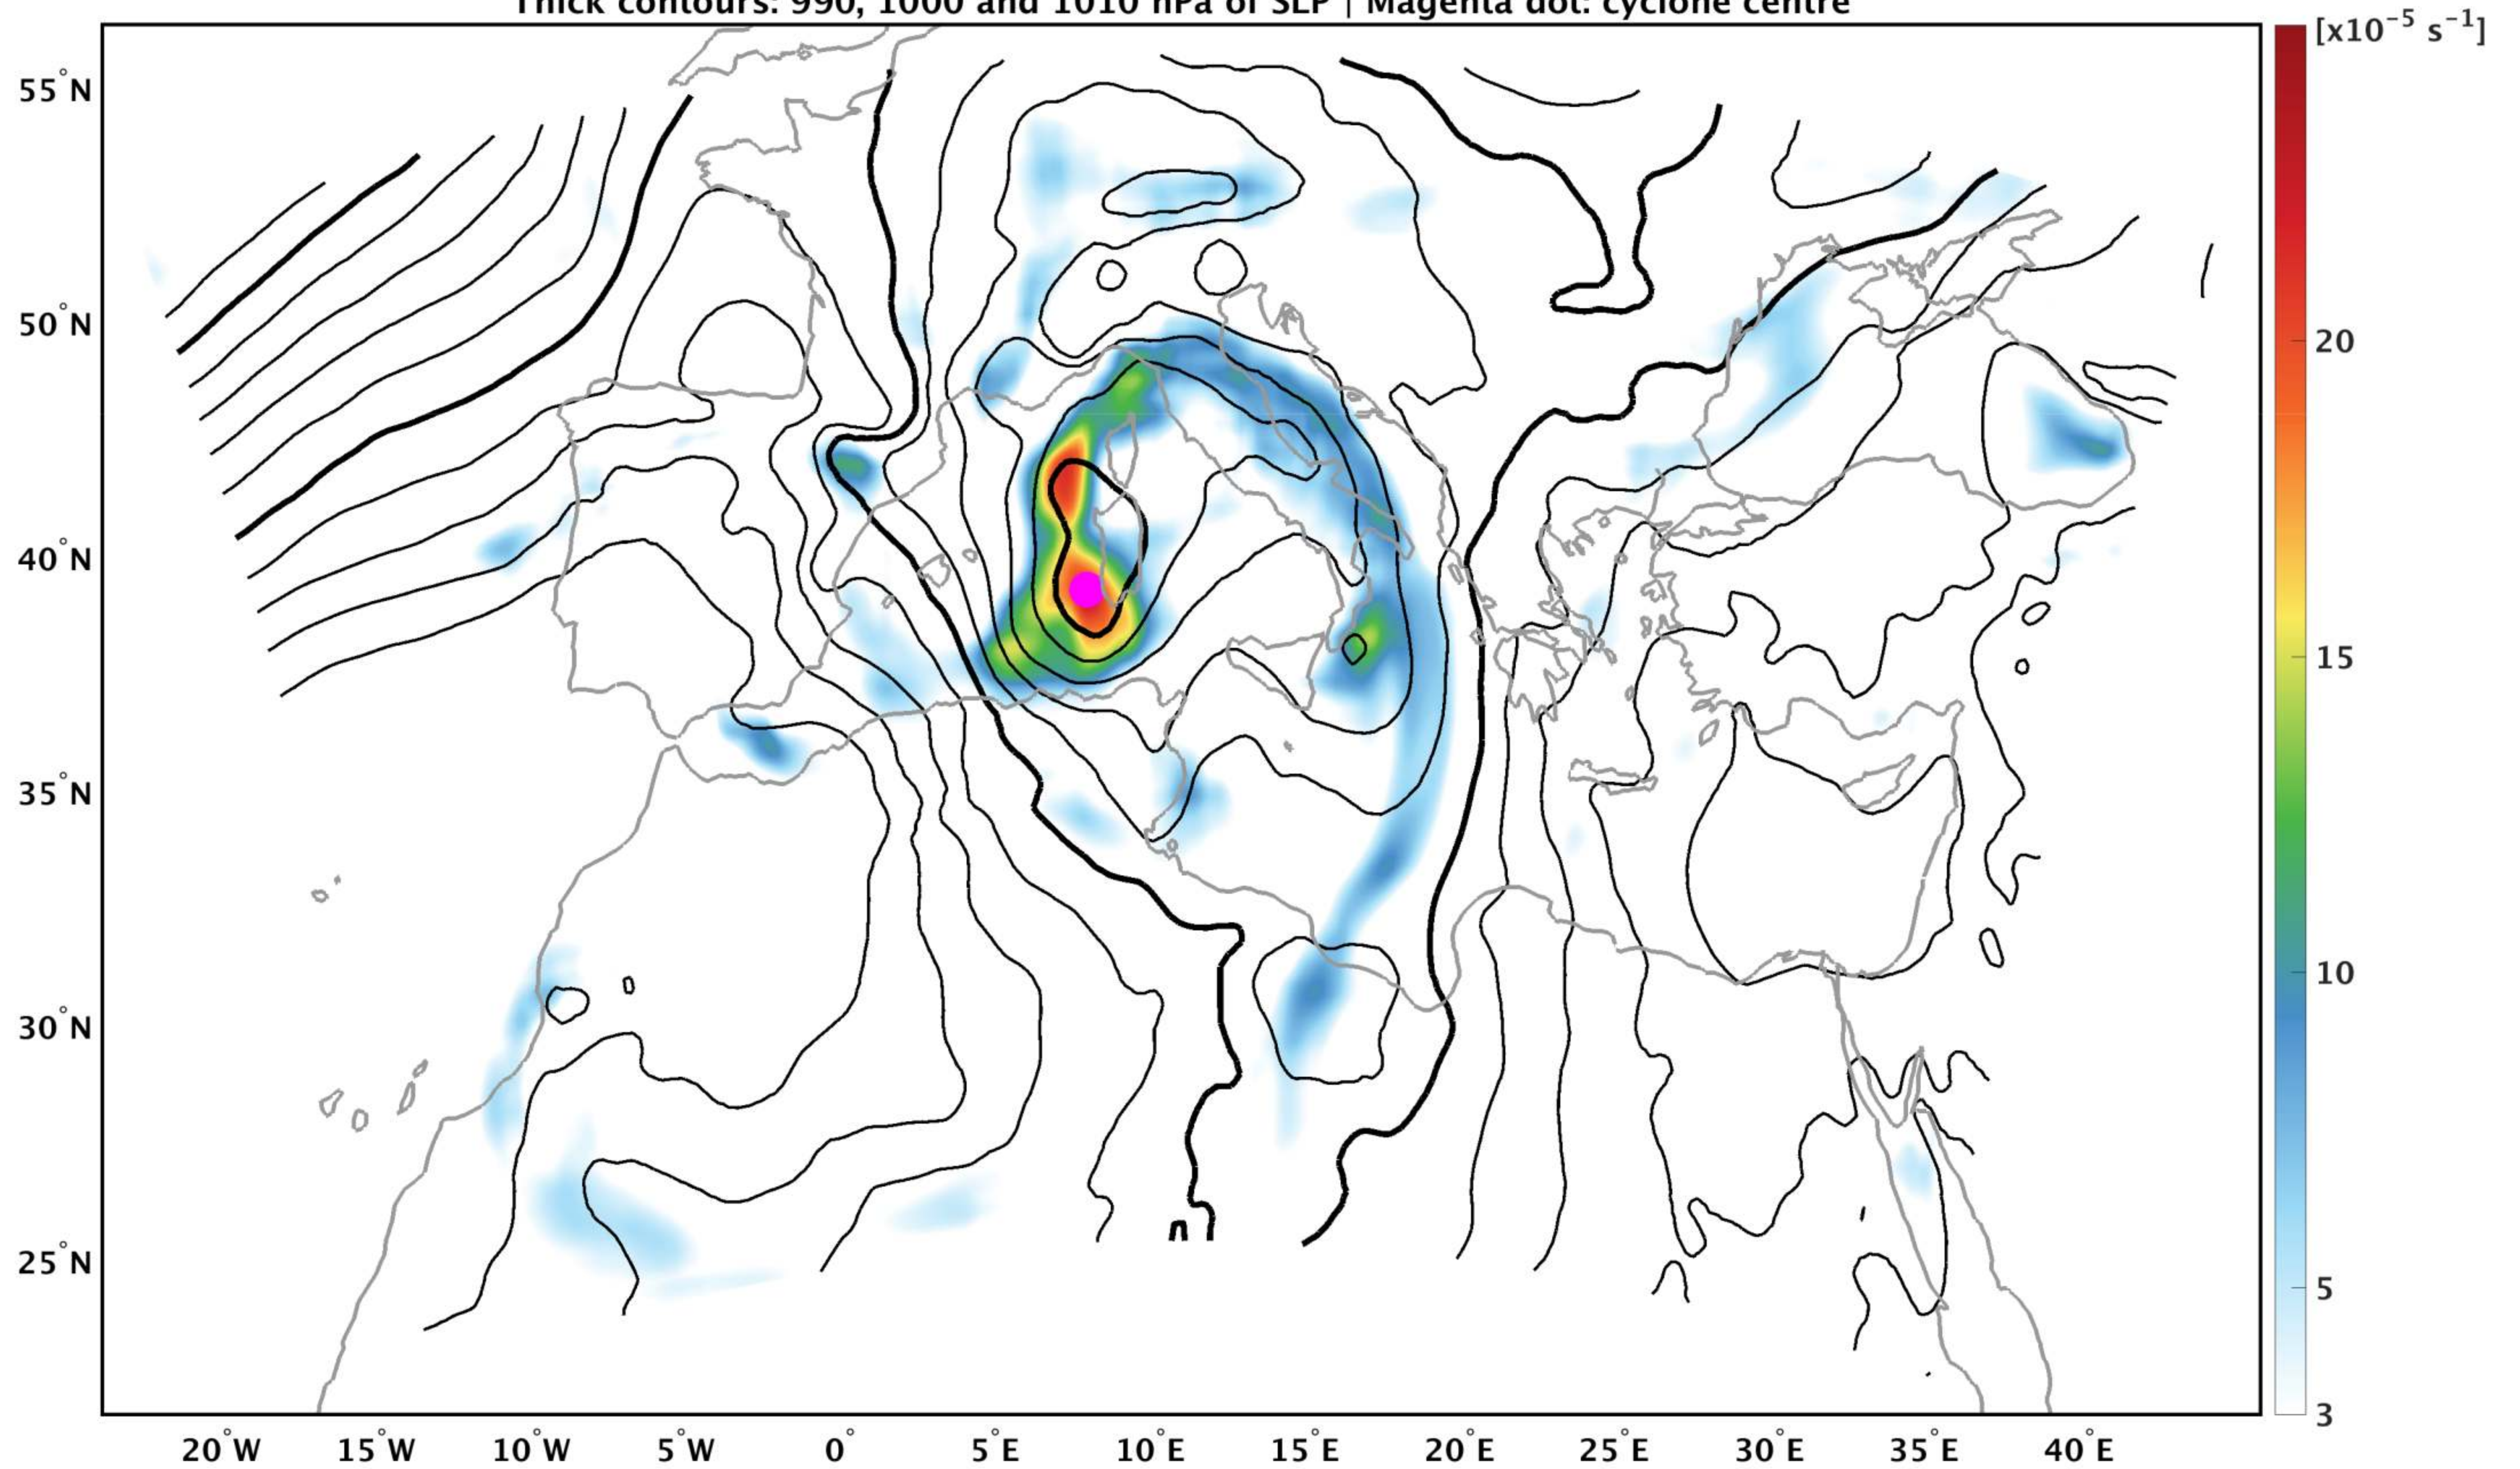



Case-73; Date: 16/2/2015

Colour: Relative vorticity ( $\times 10^{-5}$ ) | Contour: SLP (from 1018 hPa with an interval of 2 hPa)

Thick contours: 990, 1000 and 1010 hPa of SLP | Magenta dot: cyclone centre

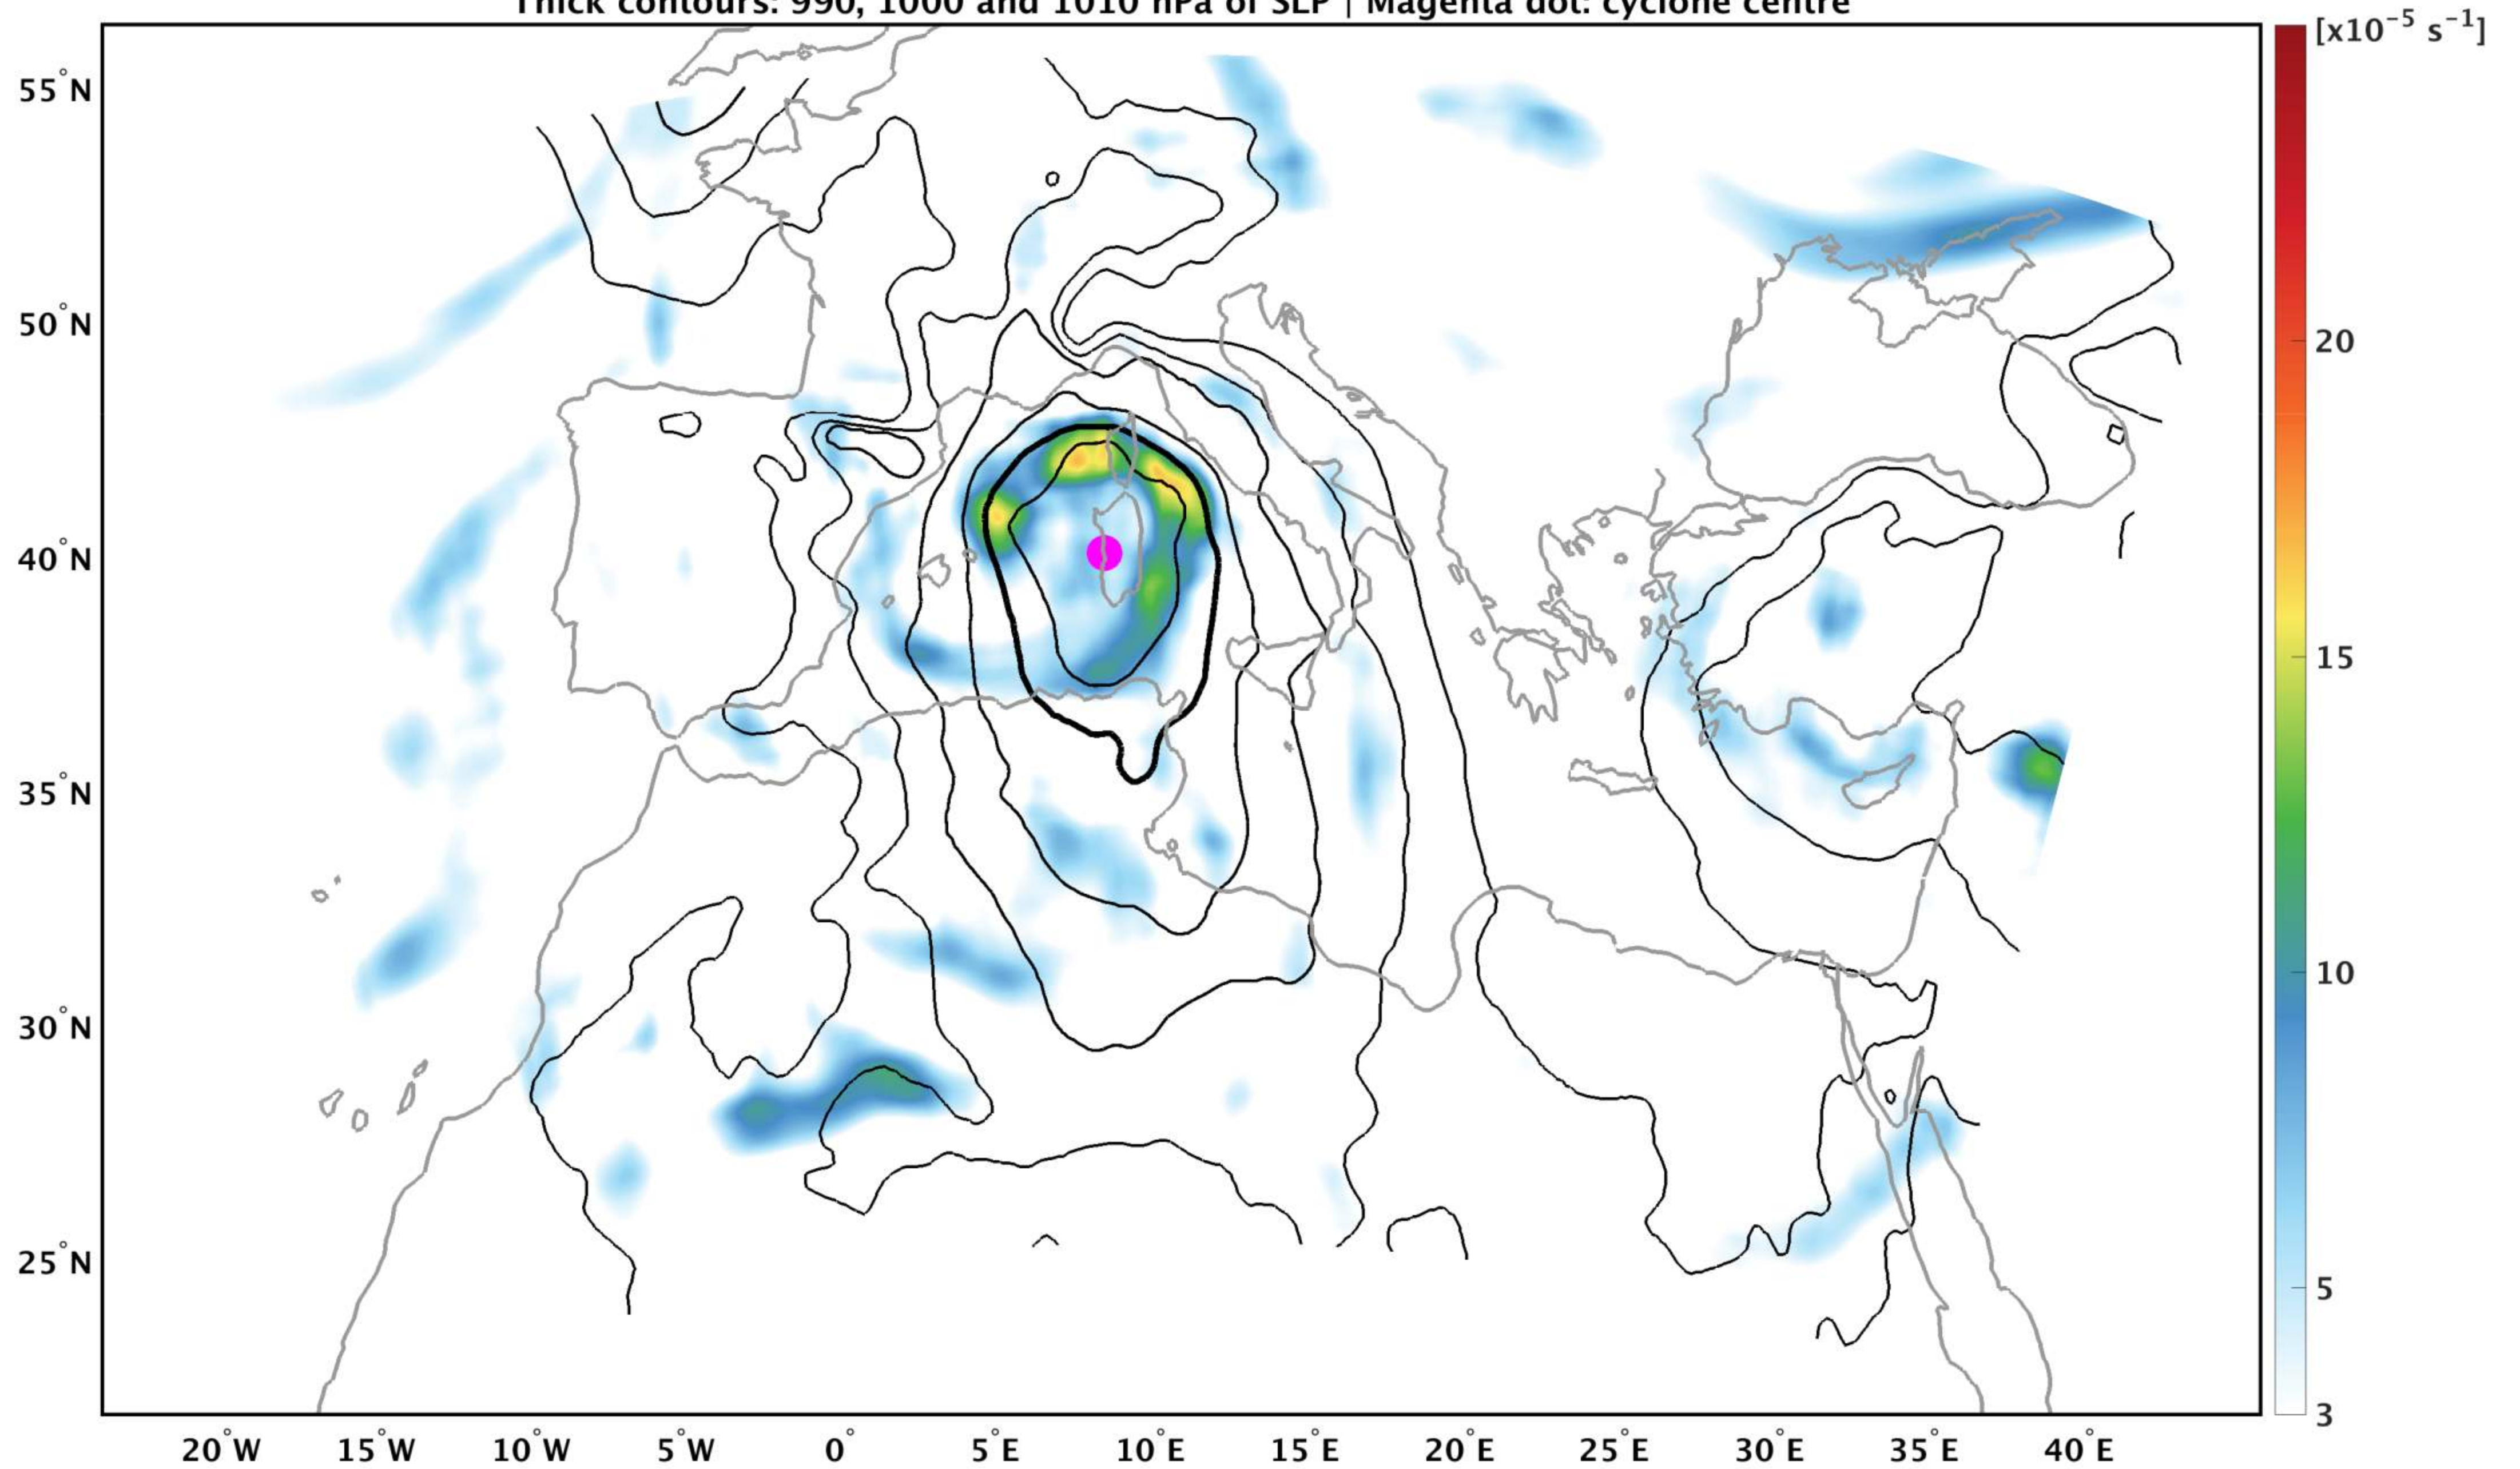



Case-74; Date: 26/2/2011

Colour: Relative vorticity ( $\times 10^{-5}$ ) | Contour: SLP (from 1018 hPa with an interval of 2 hPa)

Thick contours: 990, 1000 and 1010 hPa of SLP | Magenta dot: cyclone centre

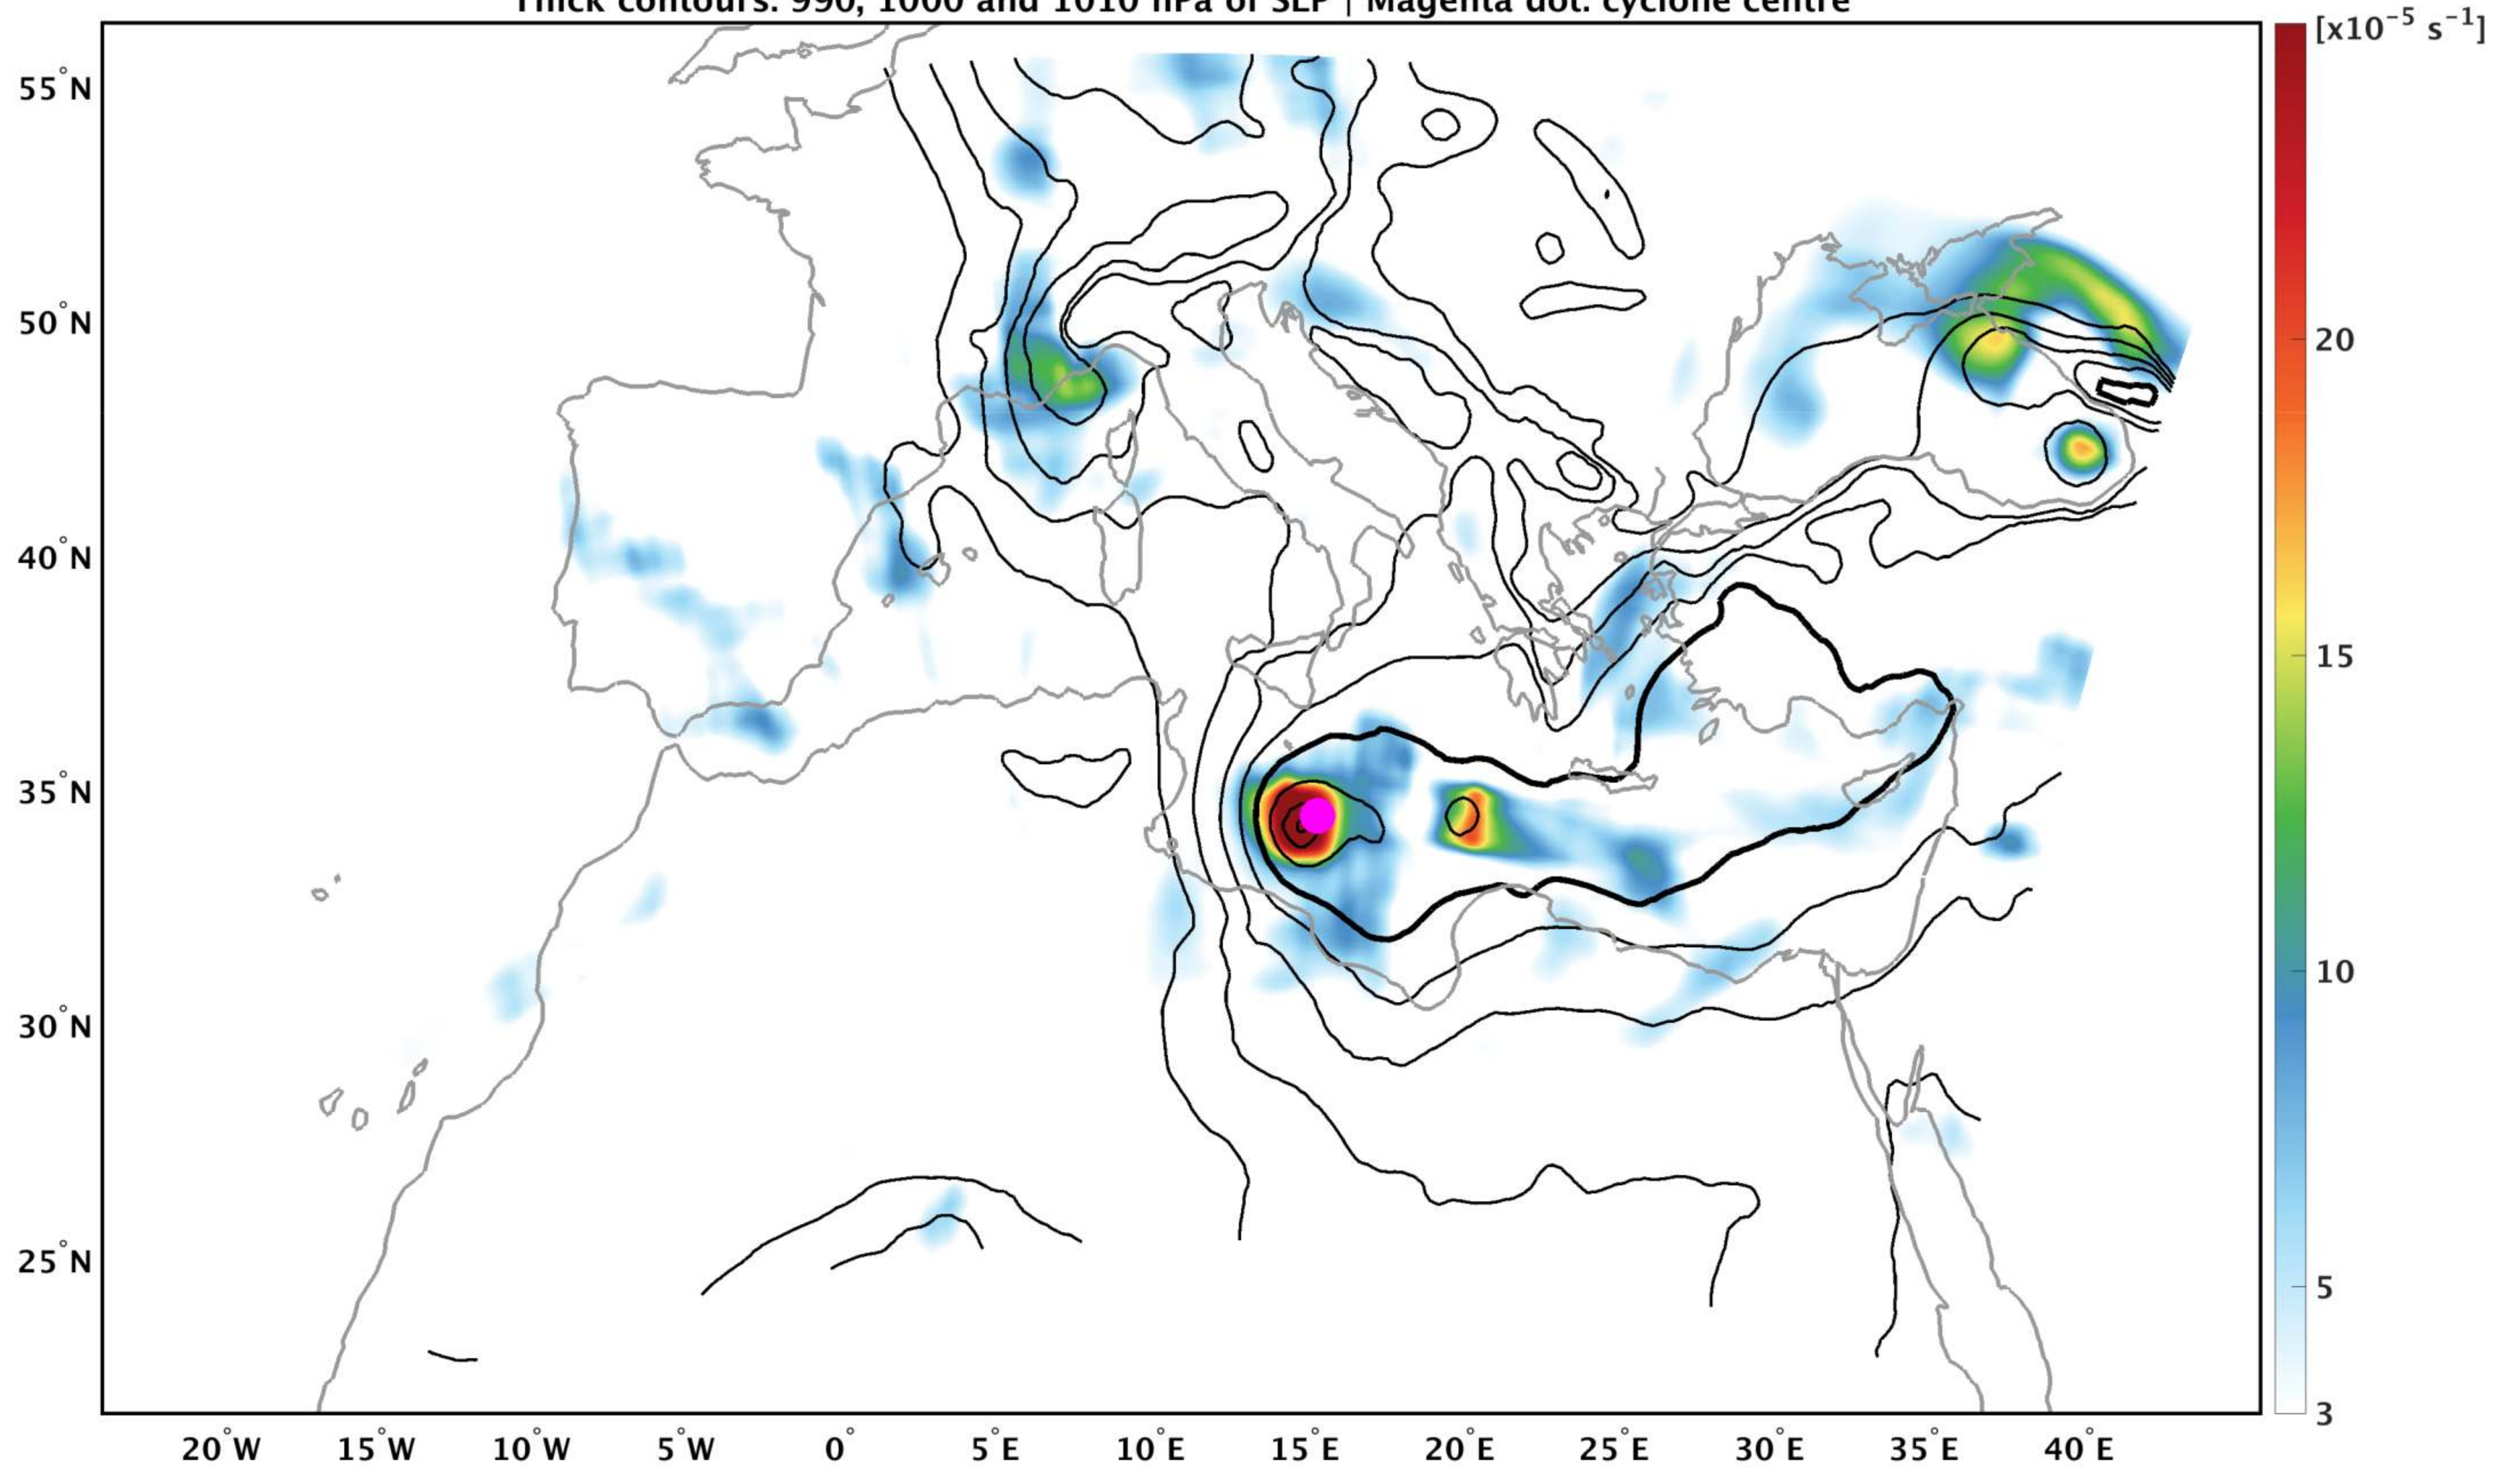



Case-75; Date: 28/10/2016

Colour: Relative vorticity ( $\times 10^{-5}$ ) | Contour: SLP (from 1018 hPa with an interval of 2 hPa)

Thick contours: 990, 1000 and 1010 hPa of SLP | Magenta dot: cyclone centre

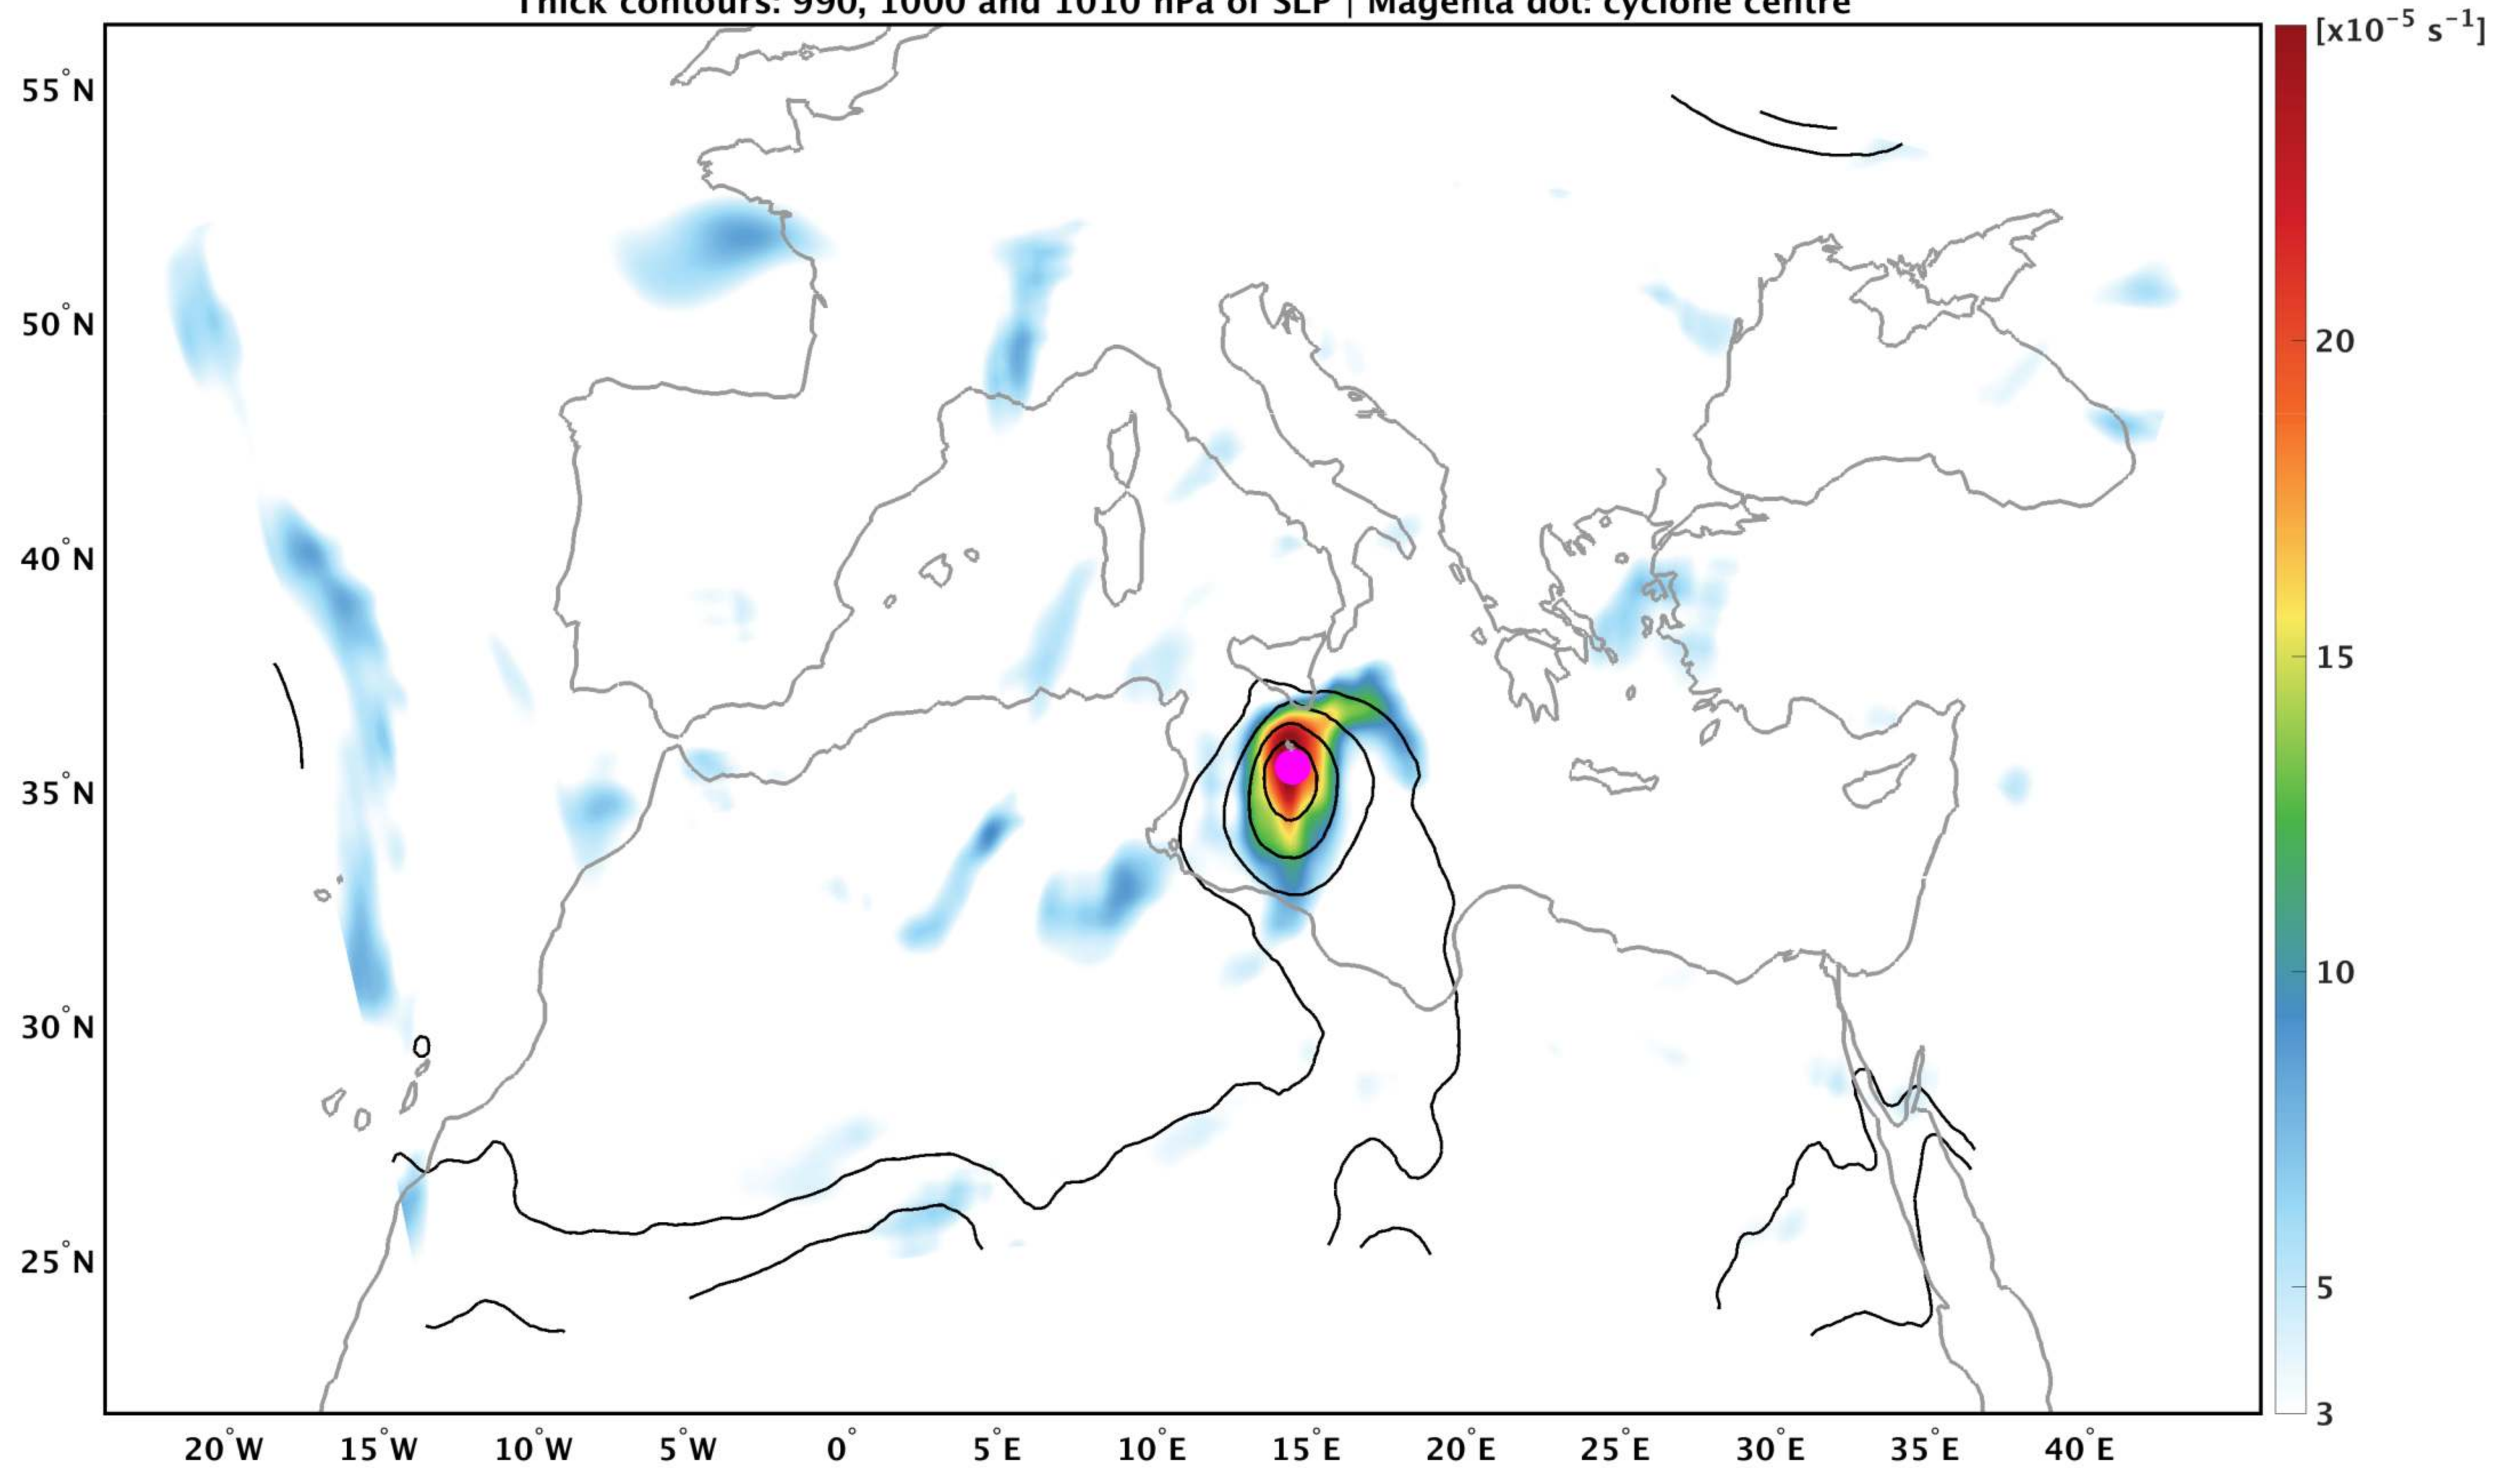



Case-76; Date: 13/11/2017

Colour: Relative vorticity ( $\times 10^{-5}$ ) | Contour: SLP (from 1018 hPa with an interval of 2 hPa)

Thick contours: 990, 1000 and 1010 hPa of SLP | Magenta dot: cyclone centre

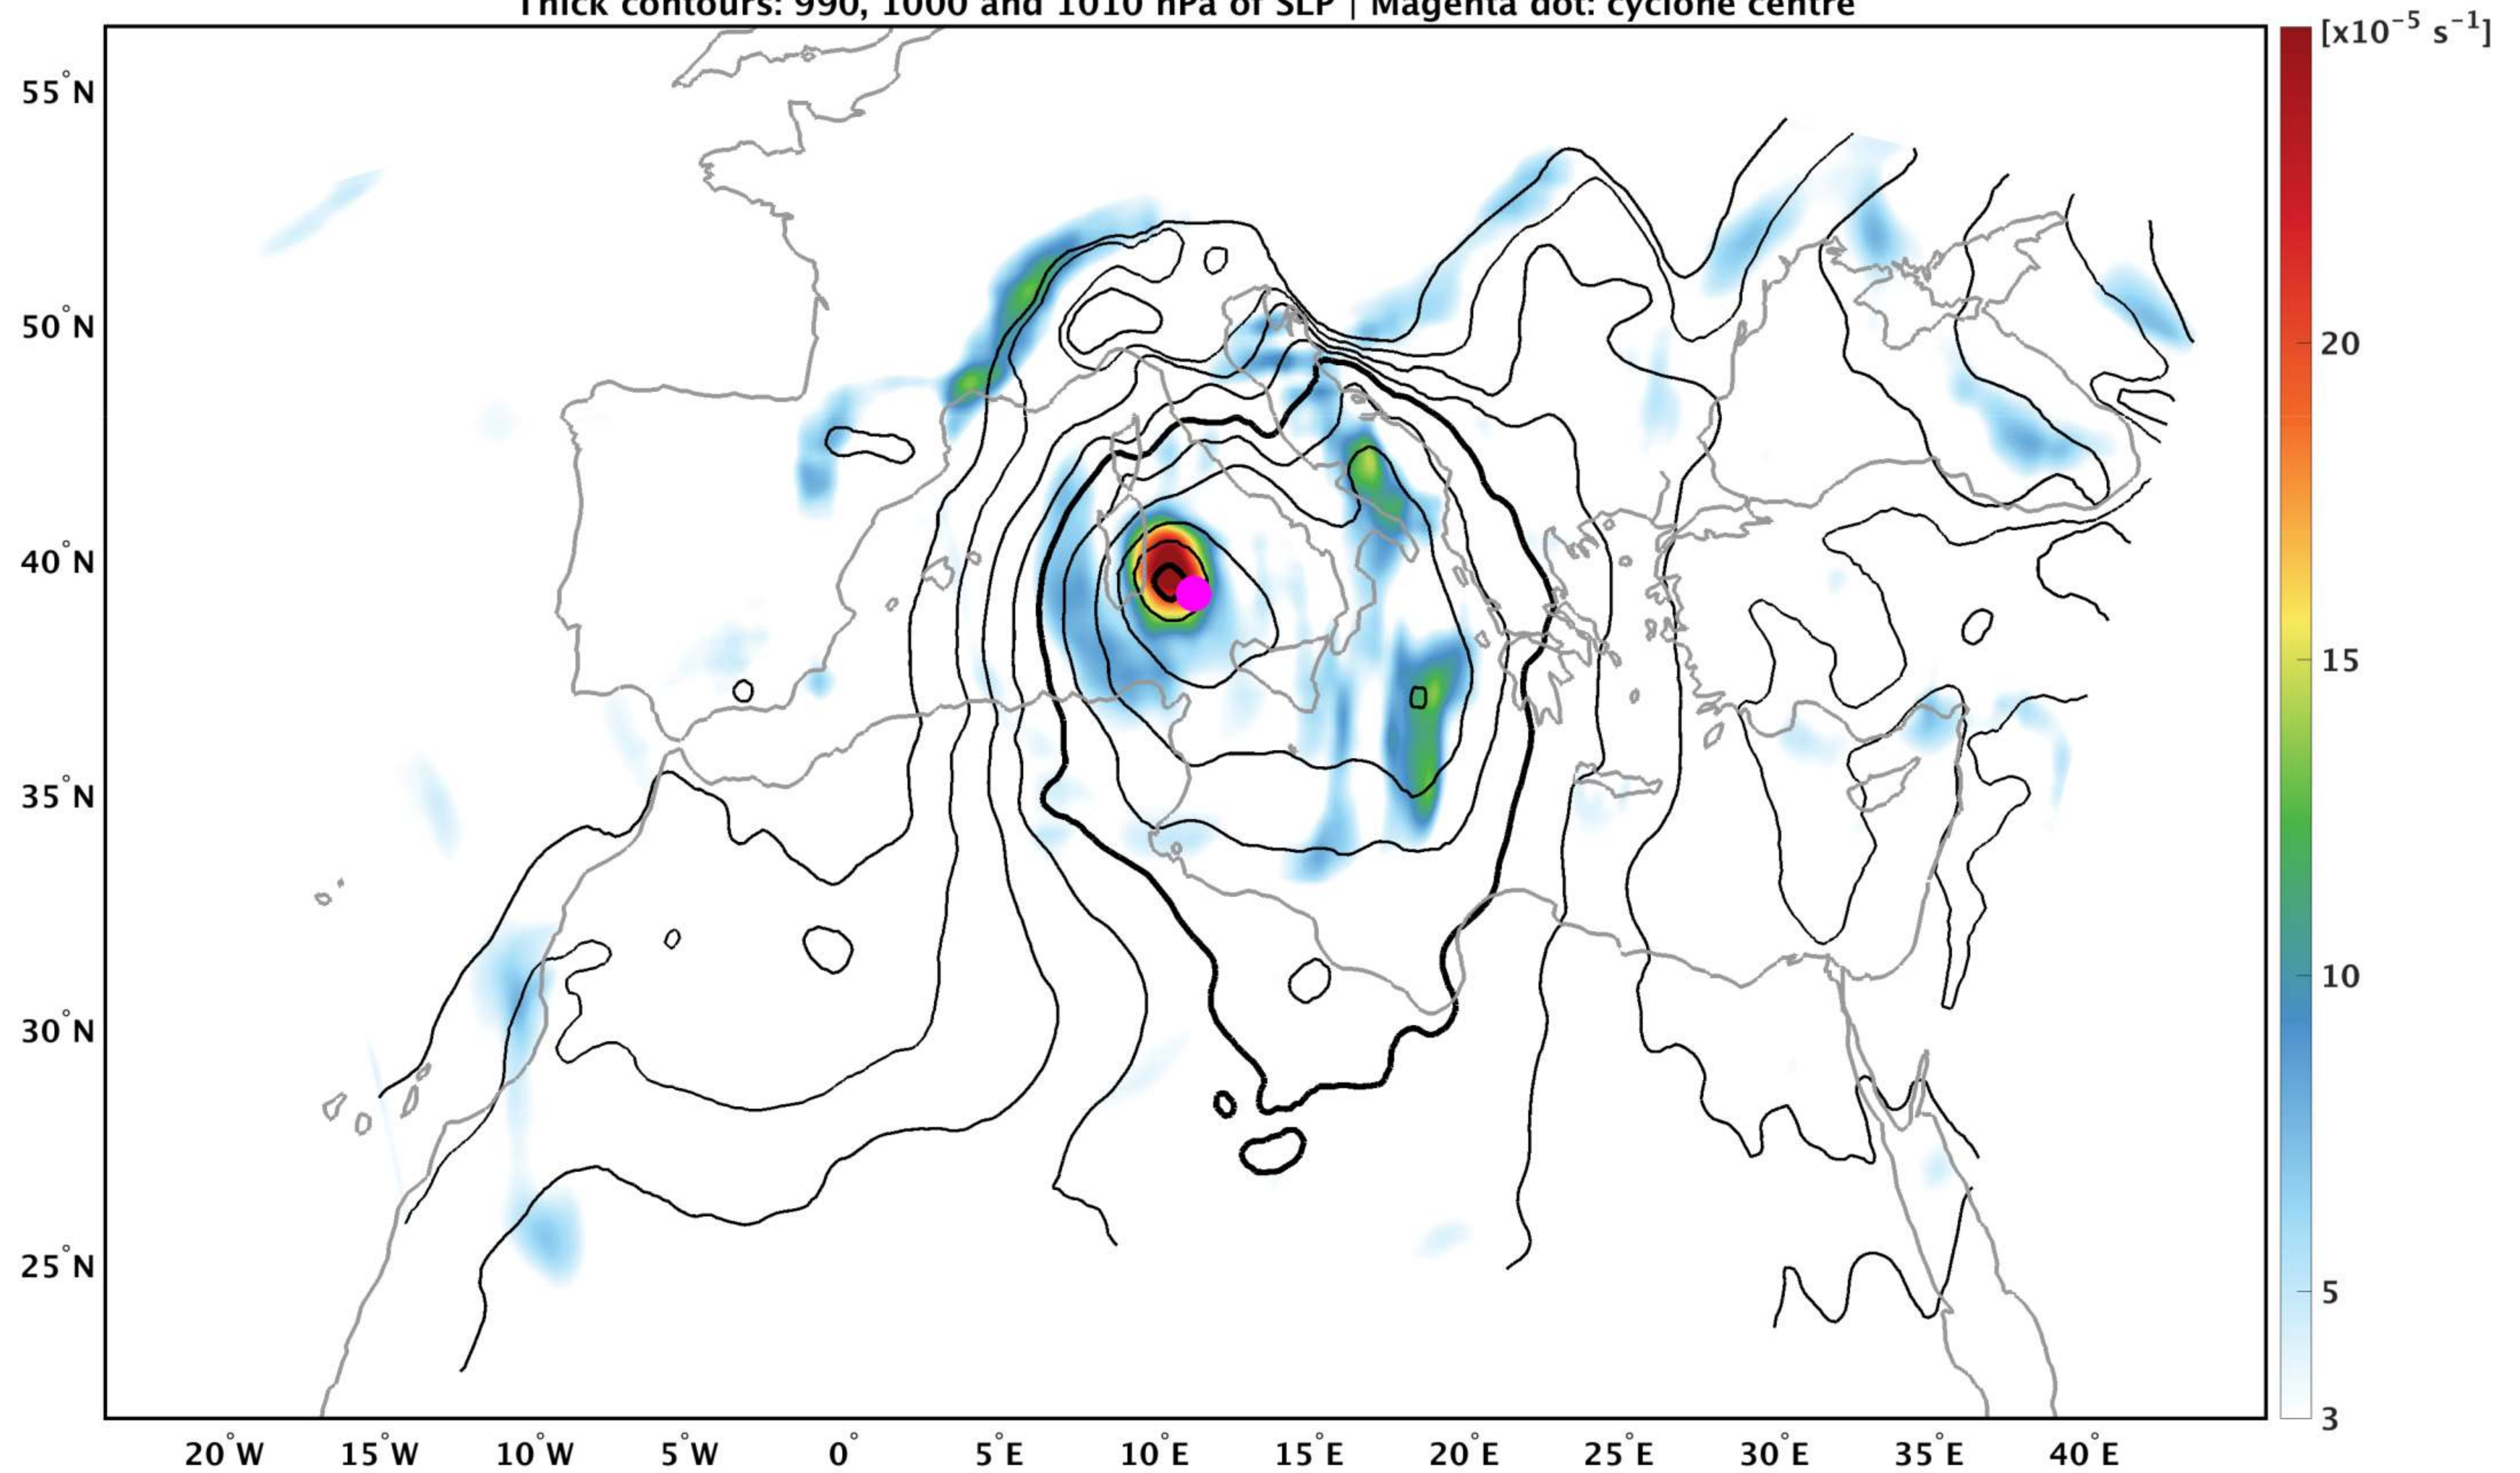



Case-77; Date: 18/4/2012

Colour: Relative vorticity ( $\times 10^{-5}$ ) | Contour: SLP (from 1018 hPa with an interval of 2 hPa)

Thick contours: 990, 1000 and 1010 hPa of SLP | Magenta dot: cyclone centre

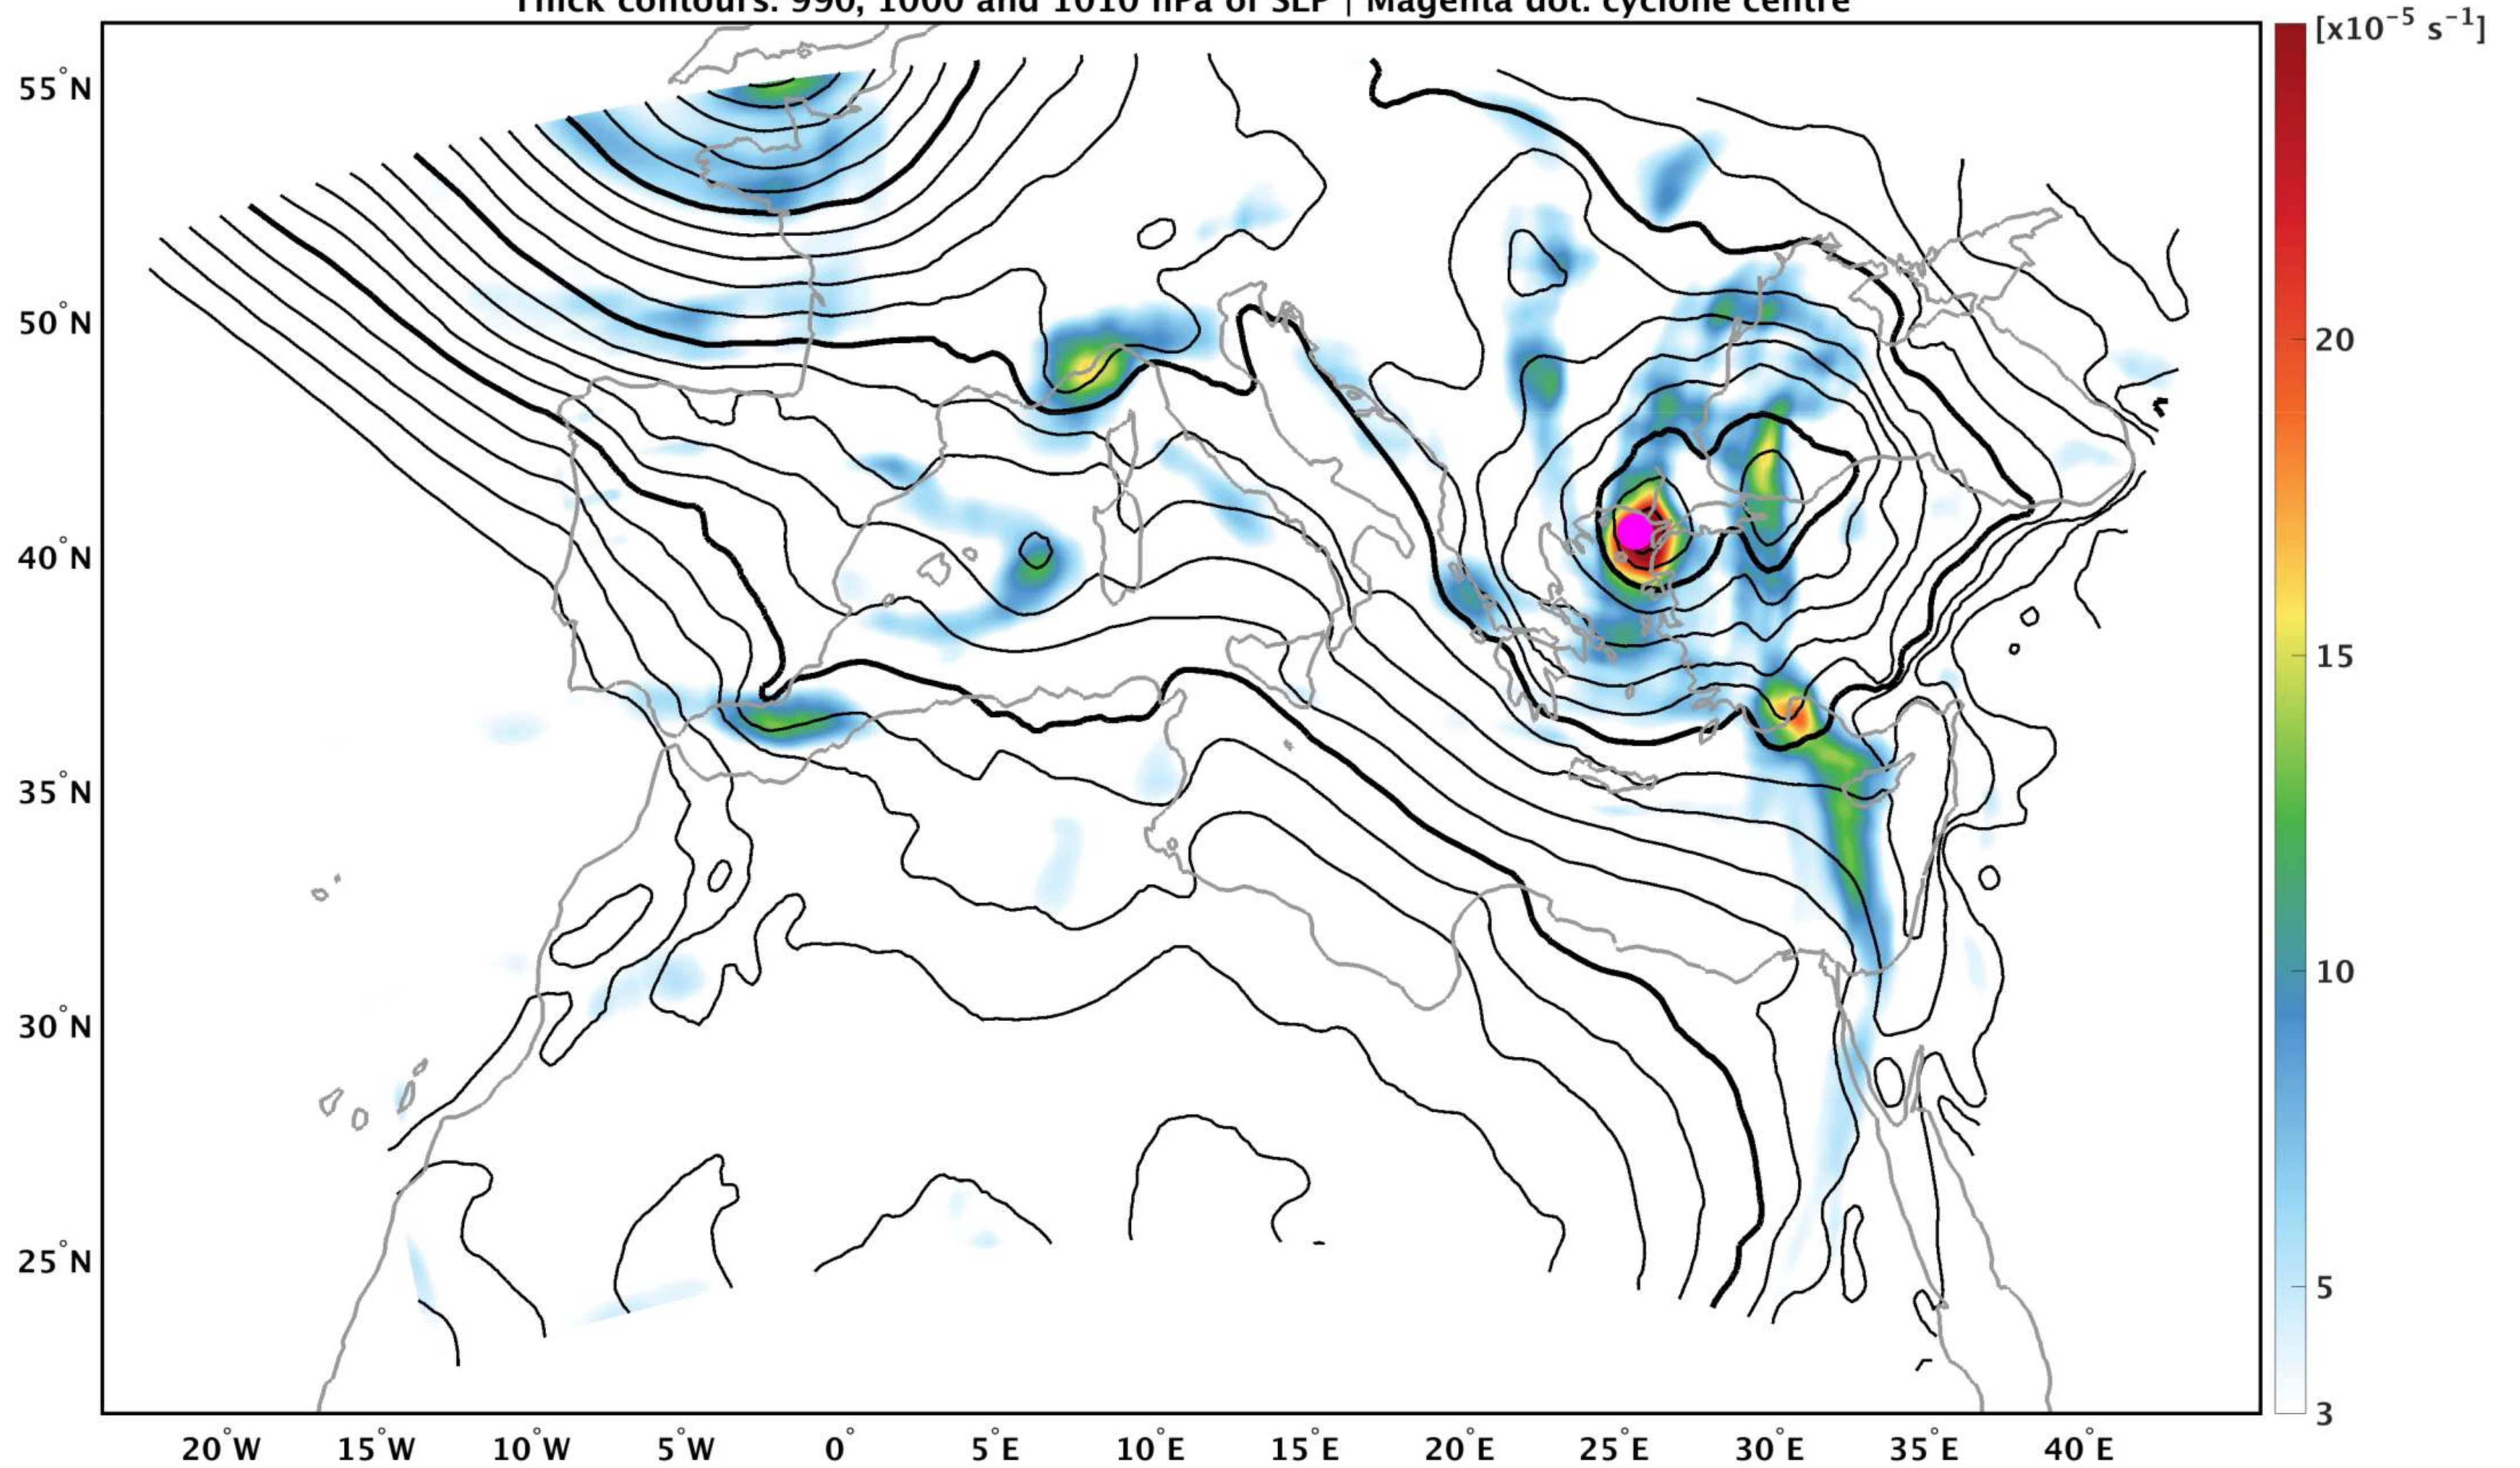



Case-78; Date: 11/11/2013

Colour: Relative vorticity ( $\times 10^{-5}$ ) | Contour: SLP (from 1018 hPa with an interval of 2 hPa)

Thick contours: 990, 1000 and 1010 hPa of SLP | Magenta dot: cyclone centre

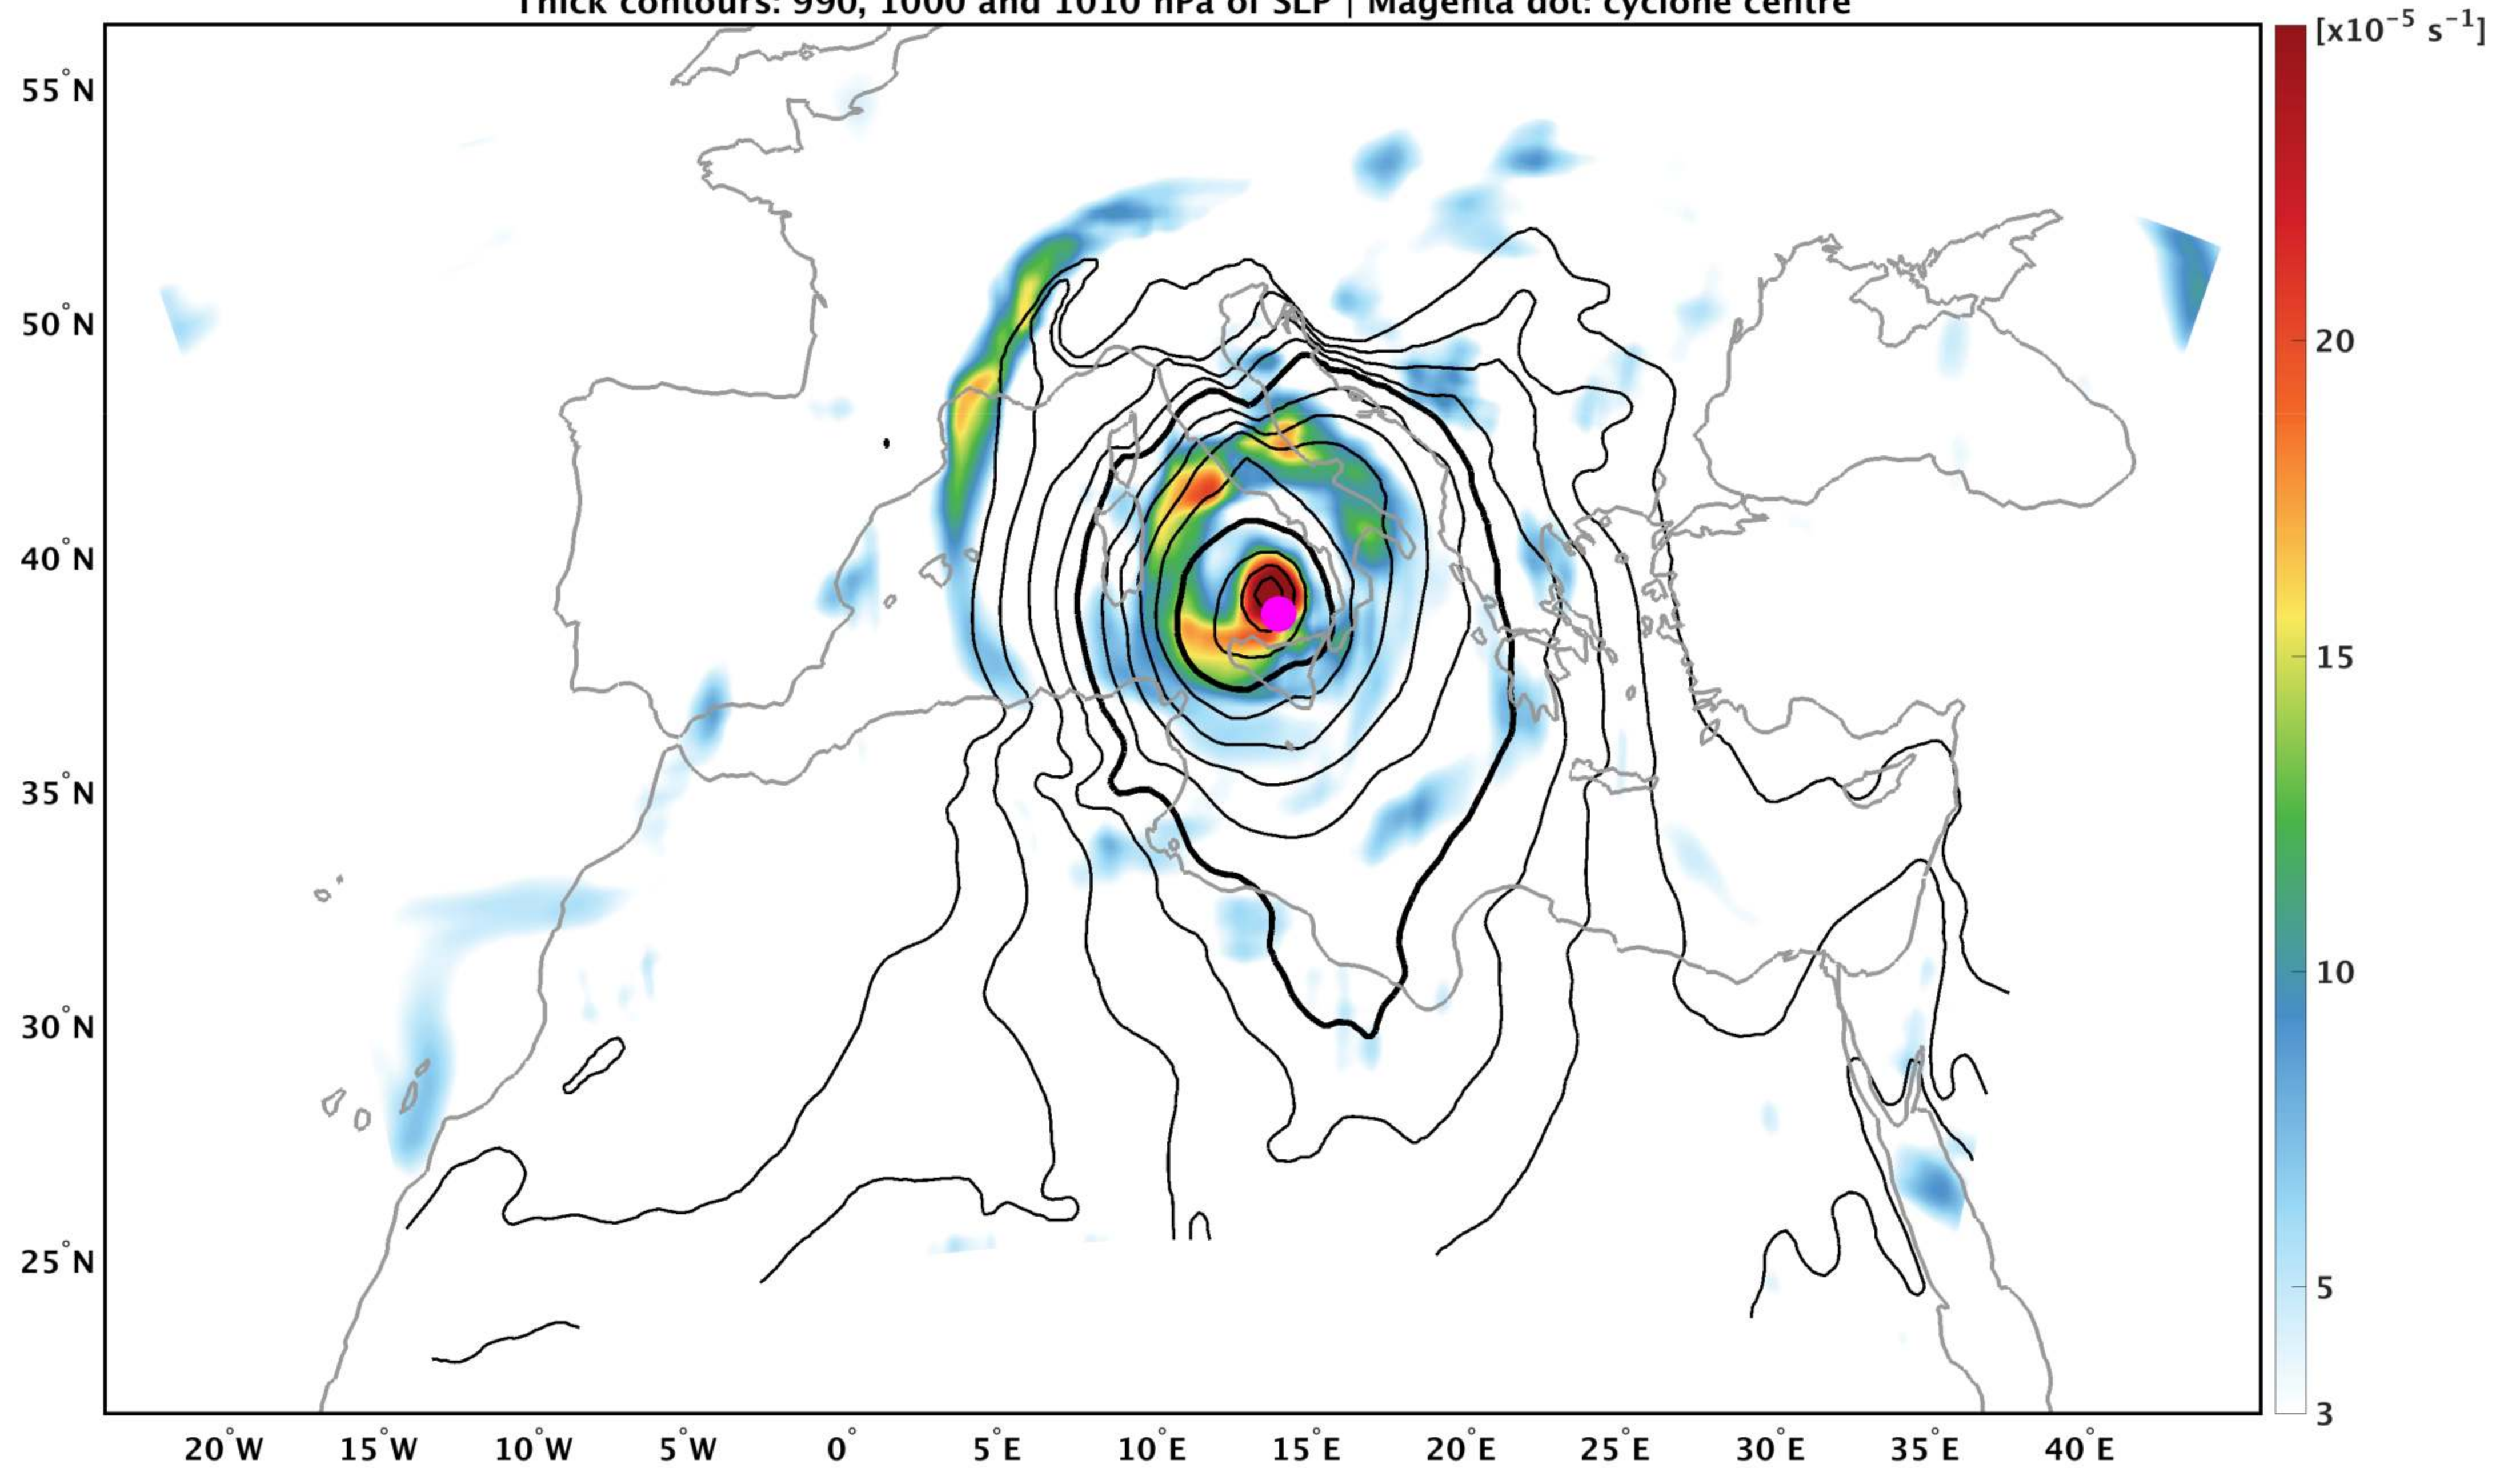



Case-79; Date: 10/2/2015

Colour: Relative vorticity ( $\times 10^{-5}$ ) | Contour: SLP (from 1018 hPa with an interval of 2 hPa)

Thick contours: 990, 1000 and 1010 hPa of SLP | Magenta dot: cyclone centre

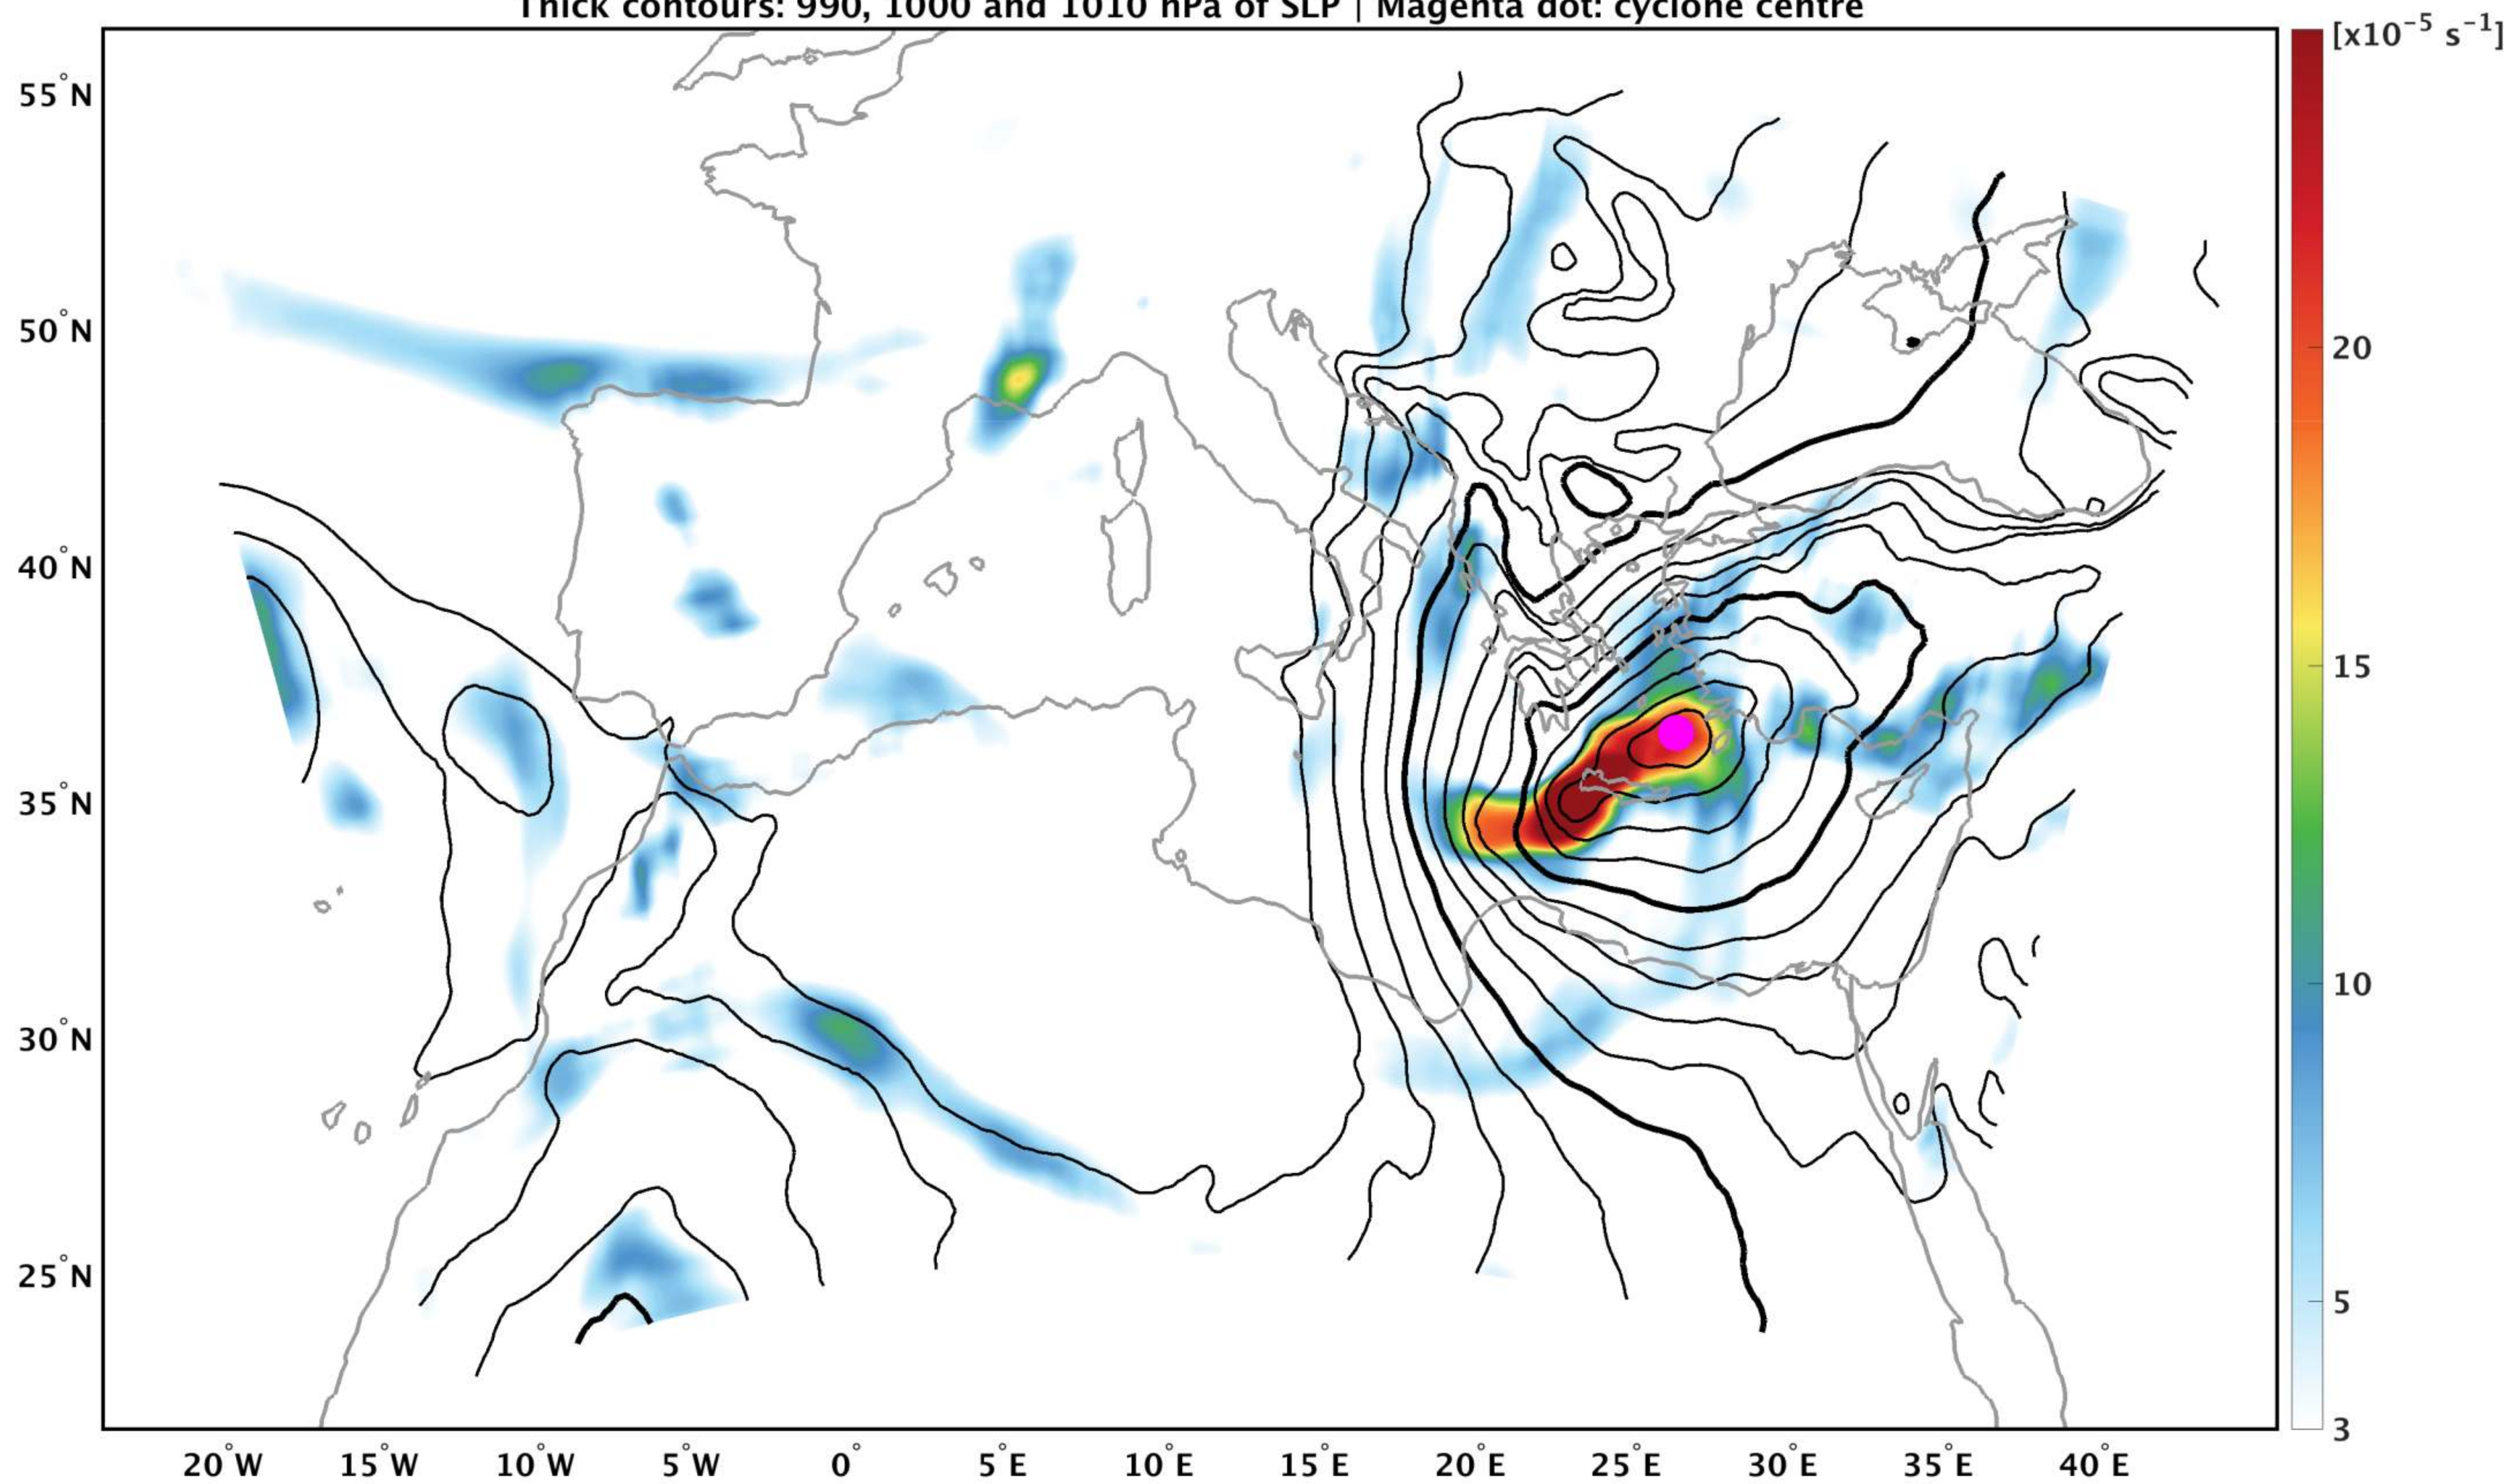



Case-80; Date: 25/2/2015

Colour: Relative vorticity ( $\times 10^{-5}$ ) | Contour: SLP (from 1018 hPa with an interval of 2 hPa)

Thick contours: 990, 1000 and 1010 hPa of SLP | Magenta dot: cyclone centre

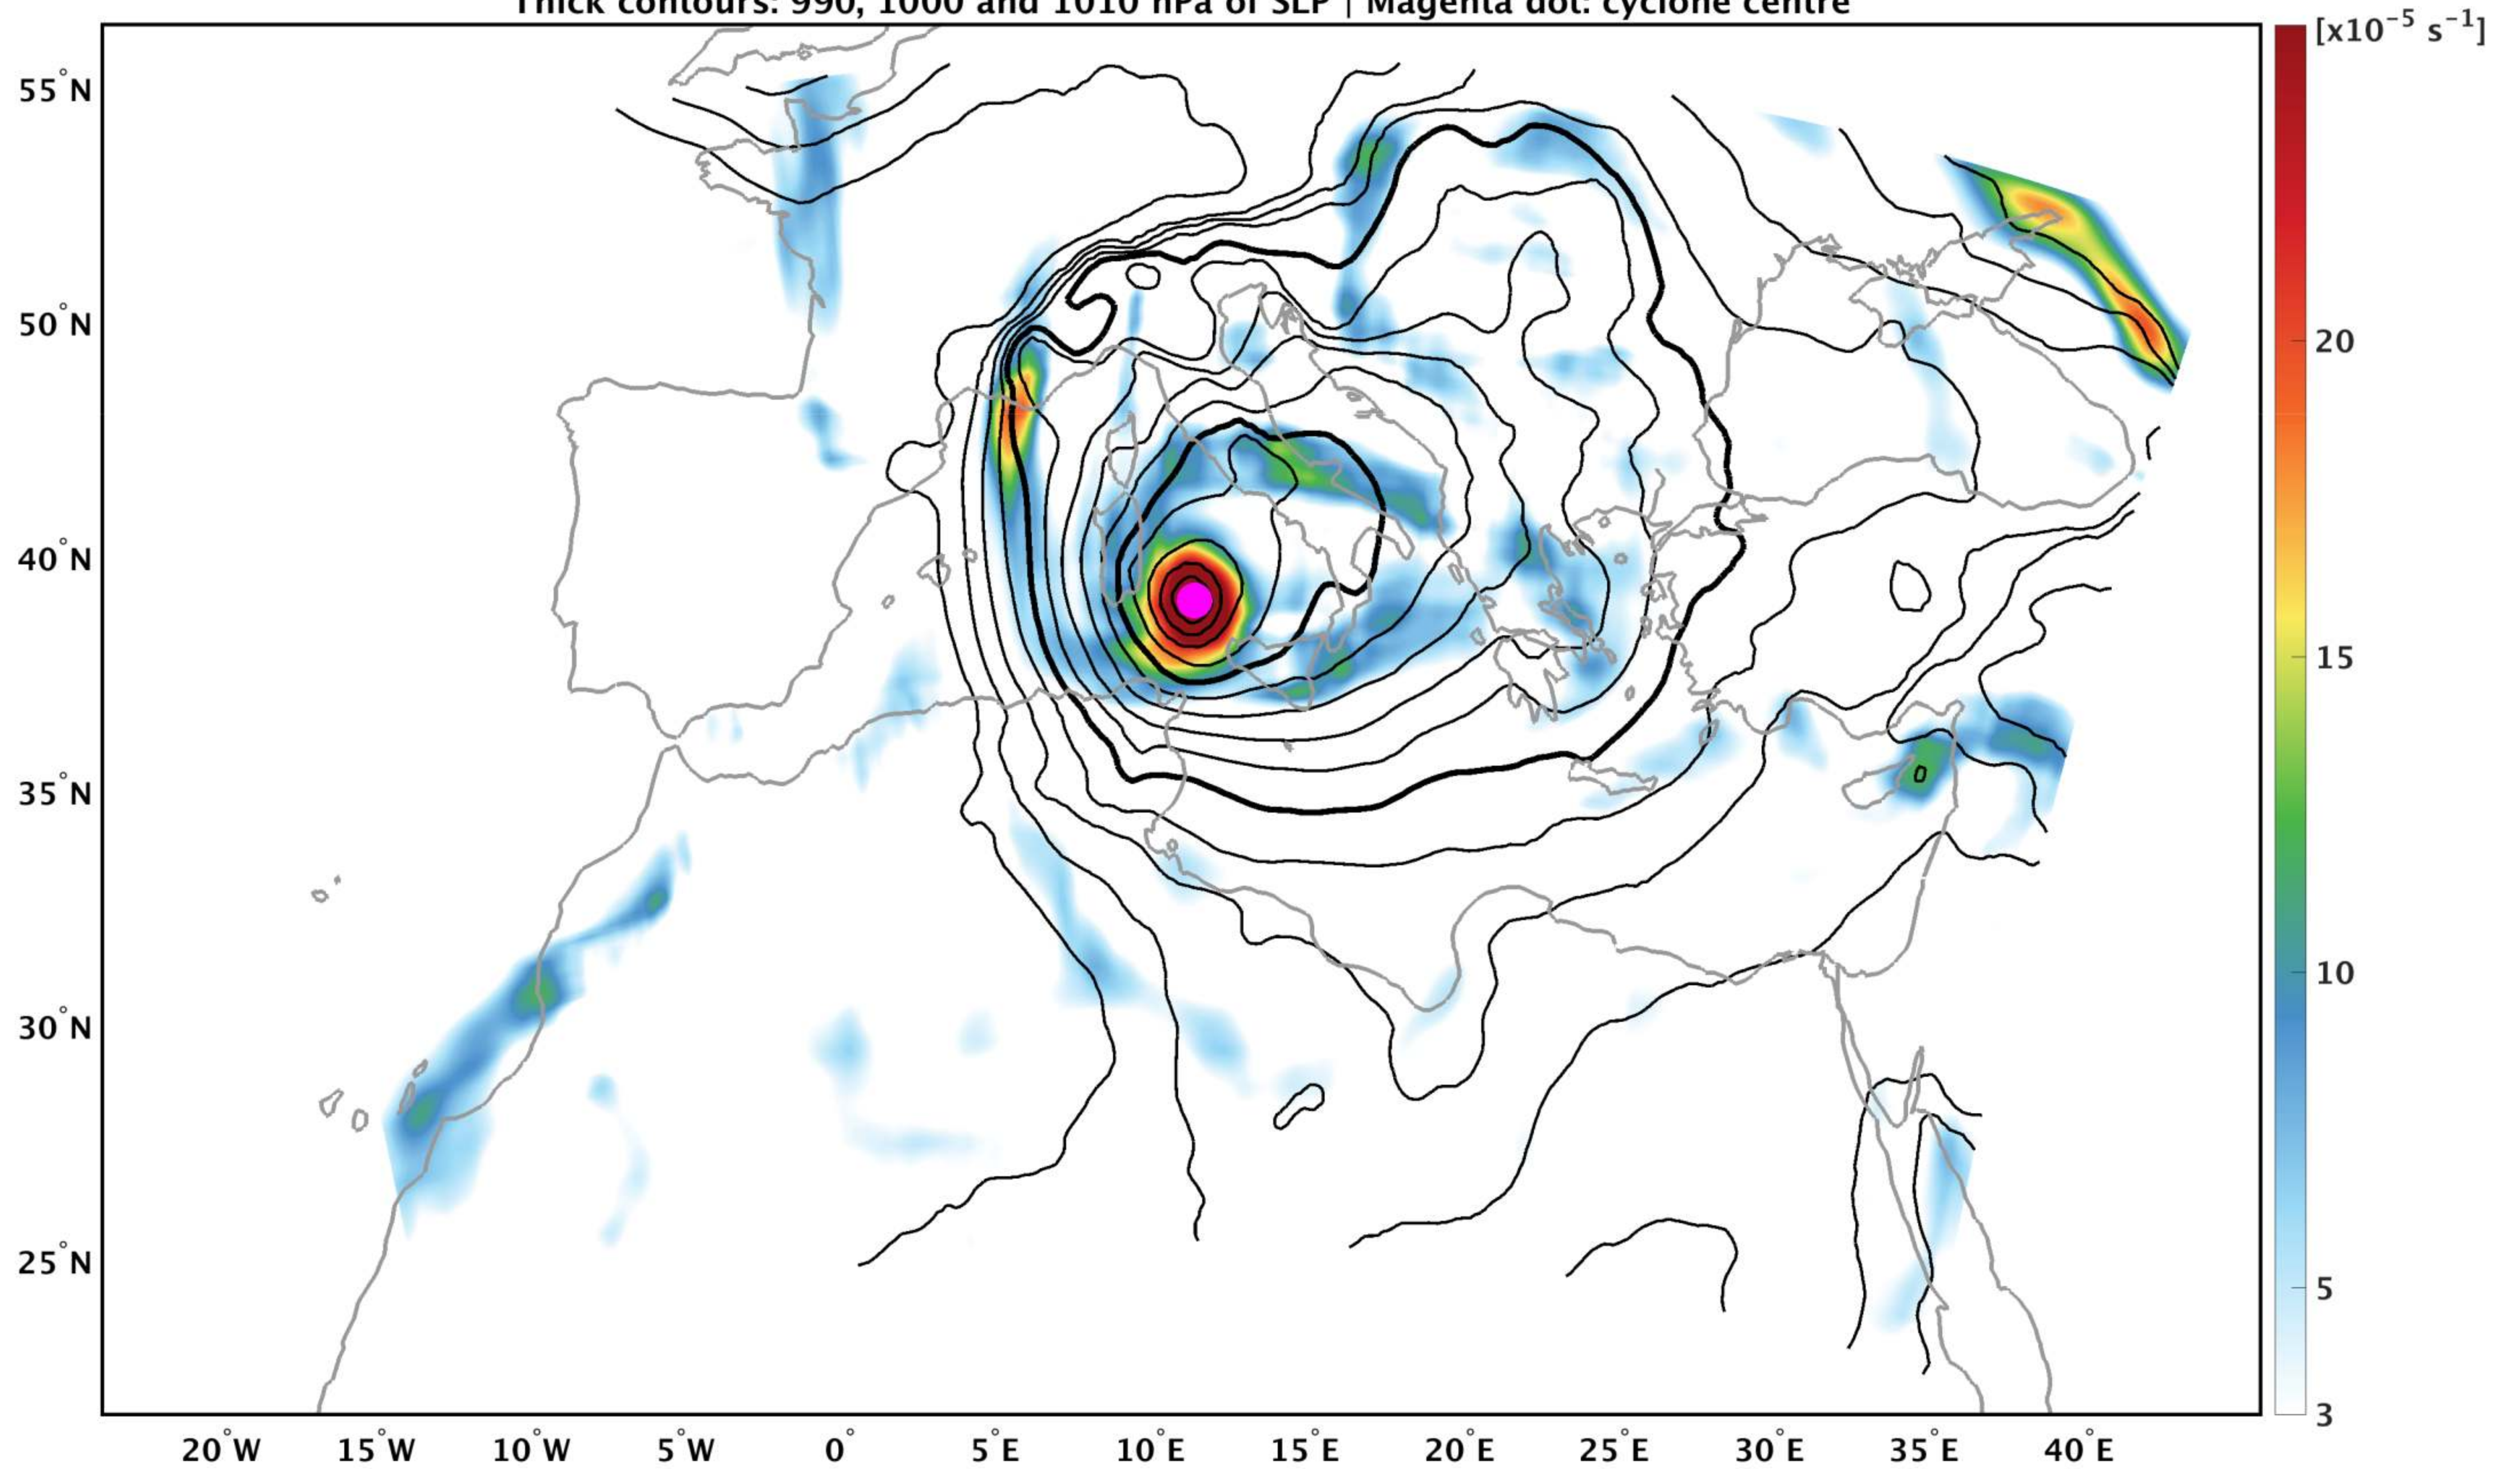



Case-81; Date: 11/12/2010

Colour: Relative vorticity ( $\times 10^{-5}$ ) | Contour: SLP (from 1018 hPa with an interval of 2 hPa)

Thick contours: 990, 1000 and 1010 hPa of SLP | Magenta dot: cyclone centre

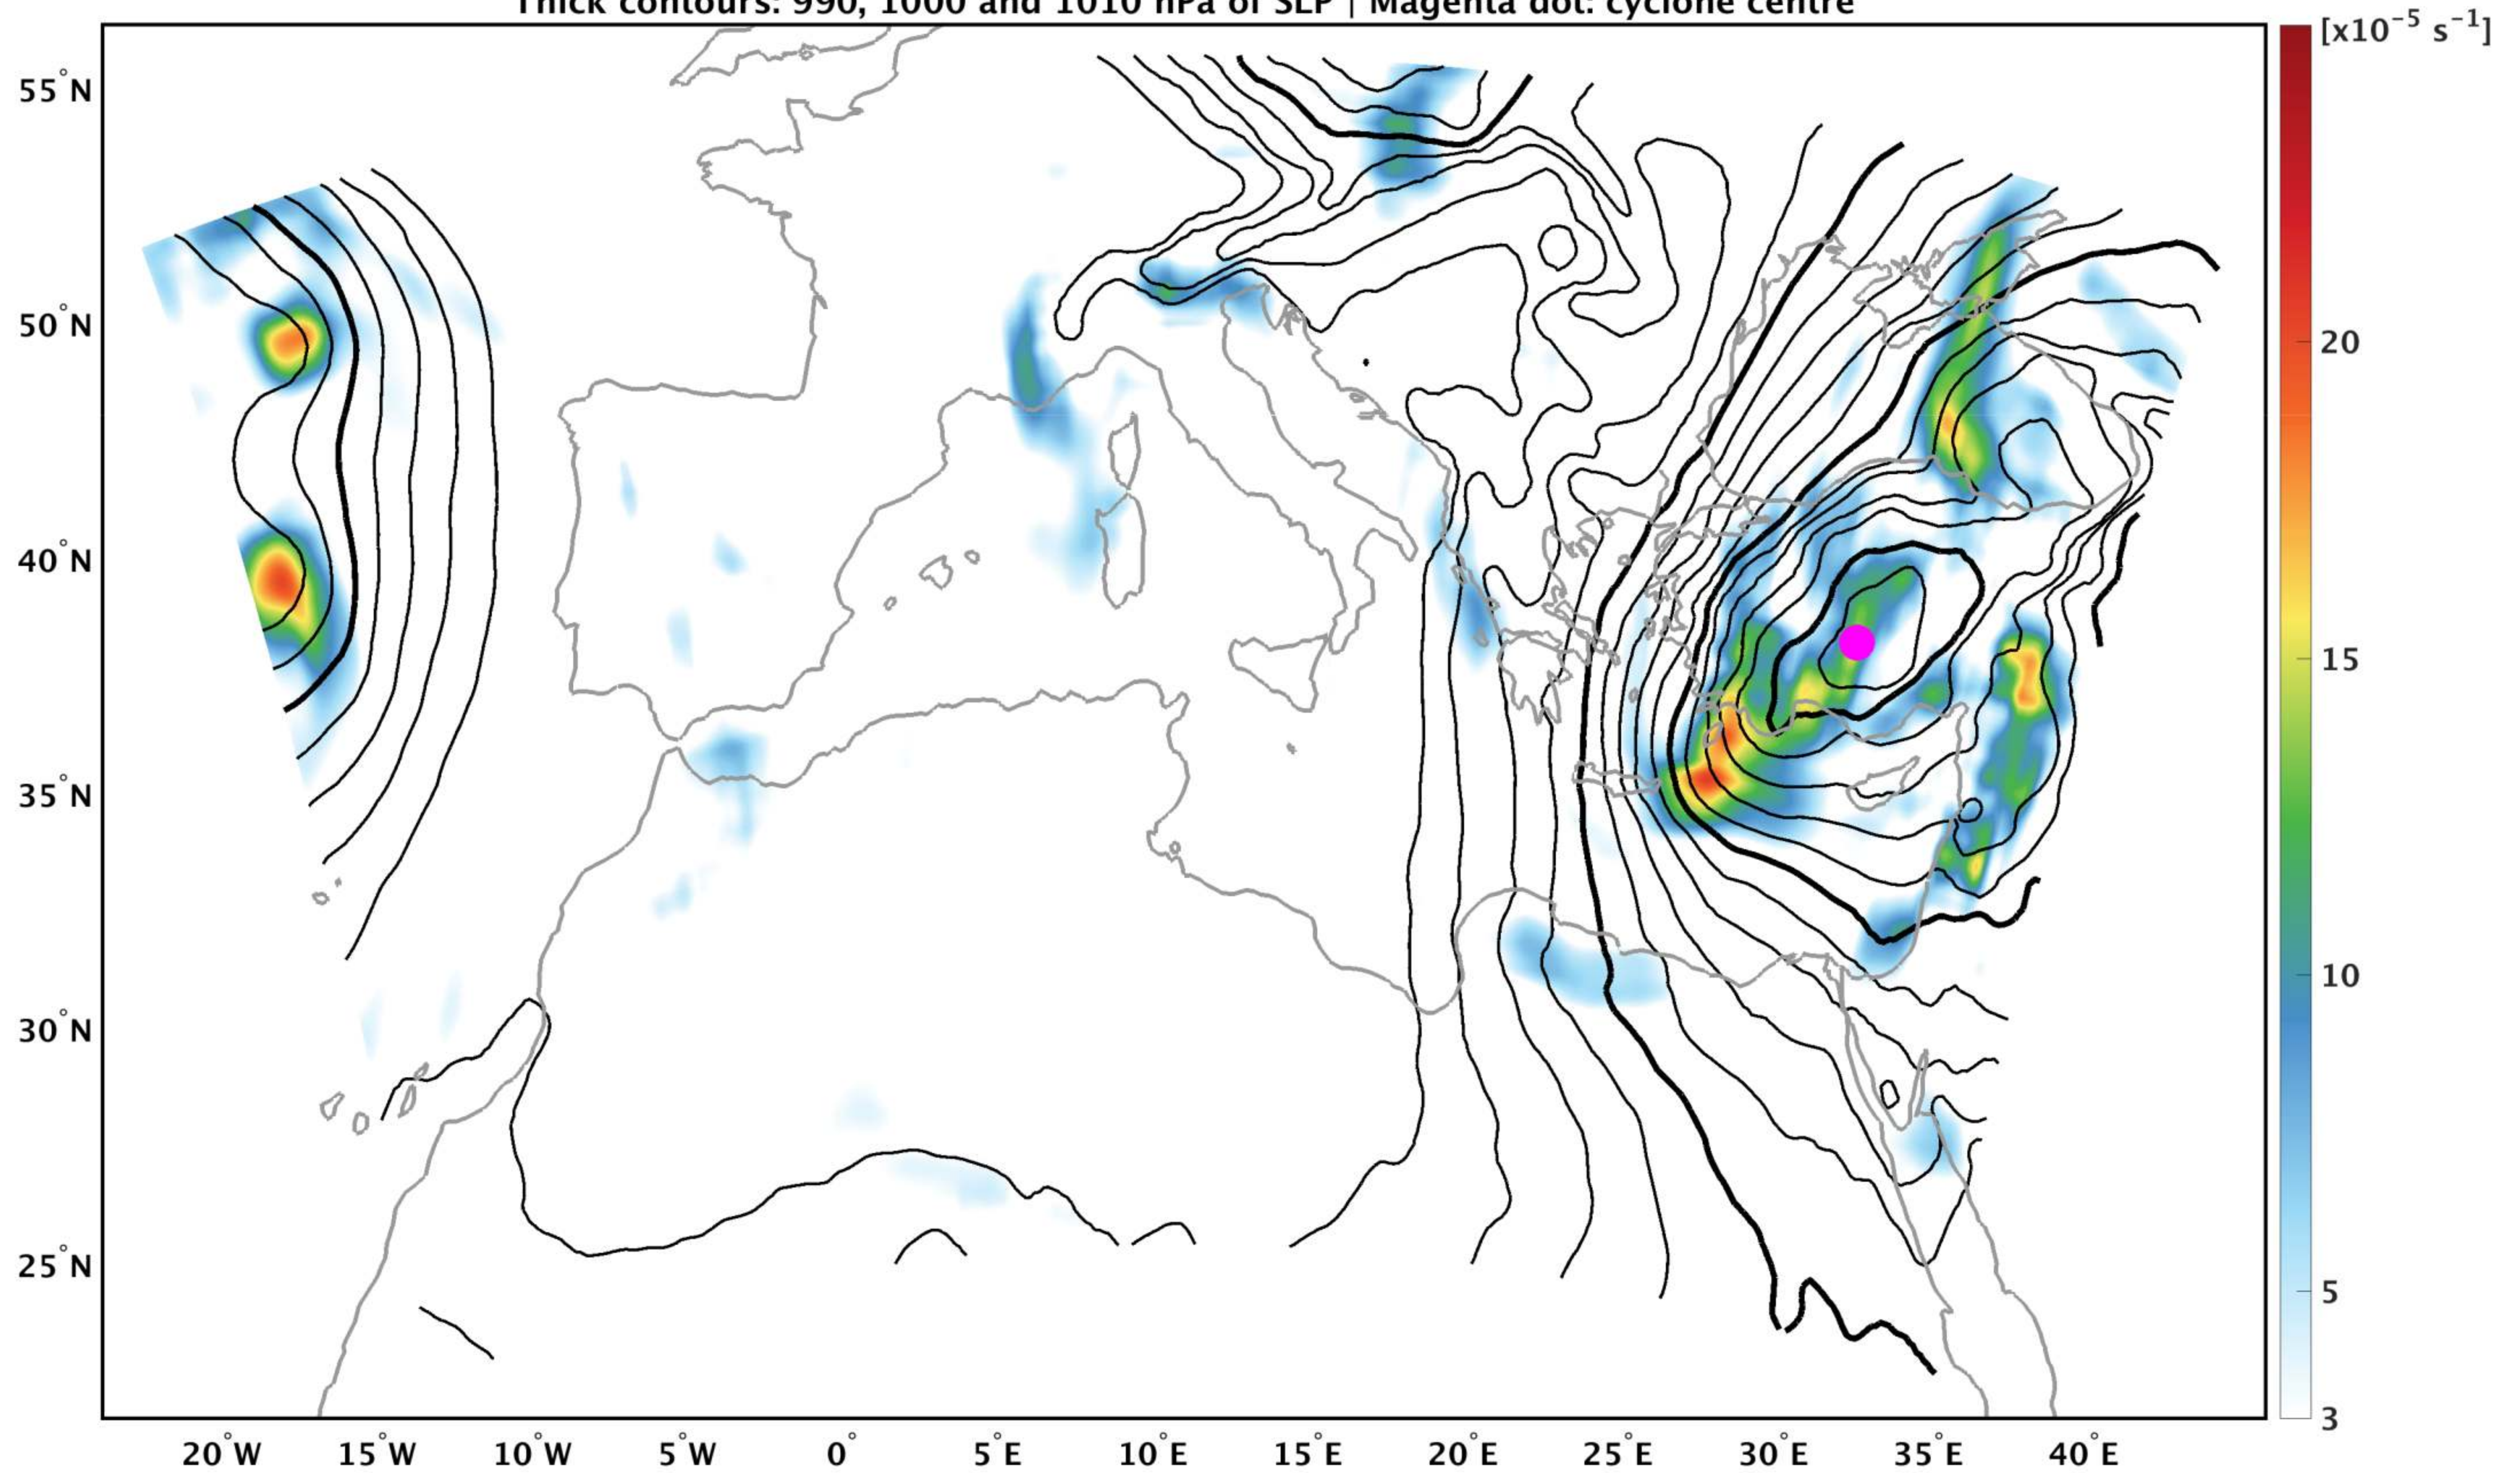



Case-82; Date: 7/3/2017

Colour: Relative vorticity ( $\times 10^{-5}$ ) | Contour: SLP (from 1018 hPa with an interval of 2 hPa)

Thick contours: 990, 1000 and 1010 hPa of SLP | Magenta dot: cyclone centre

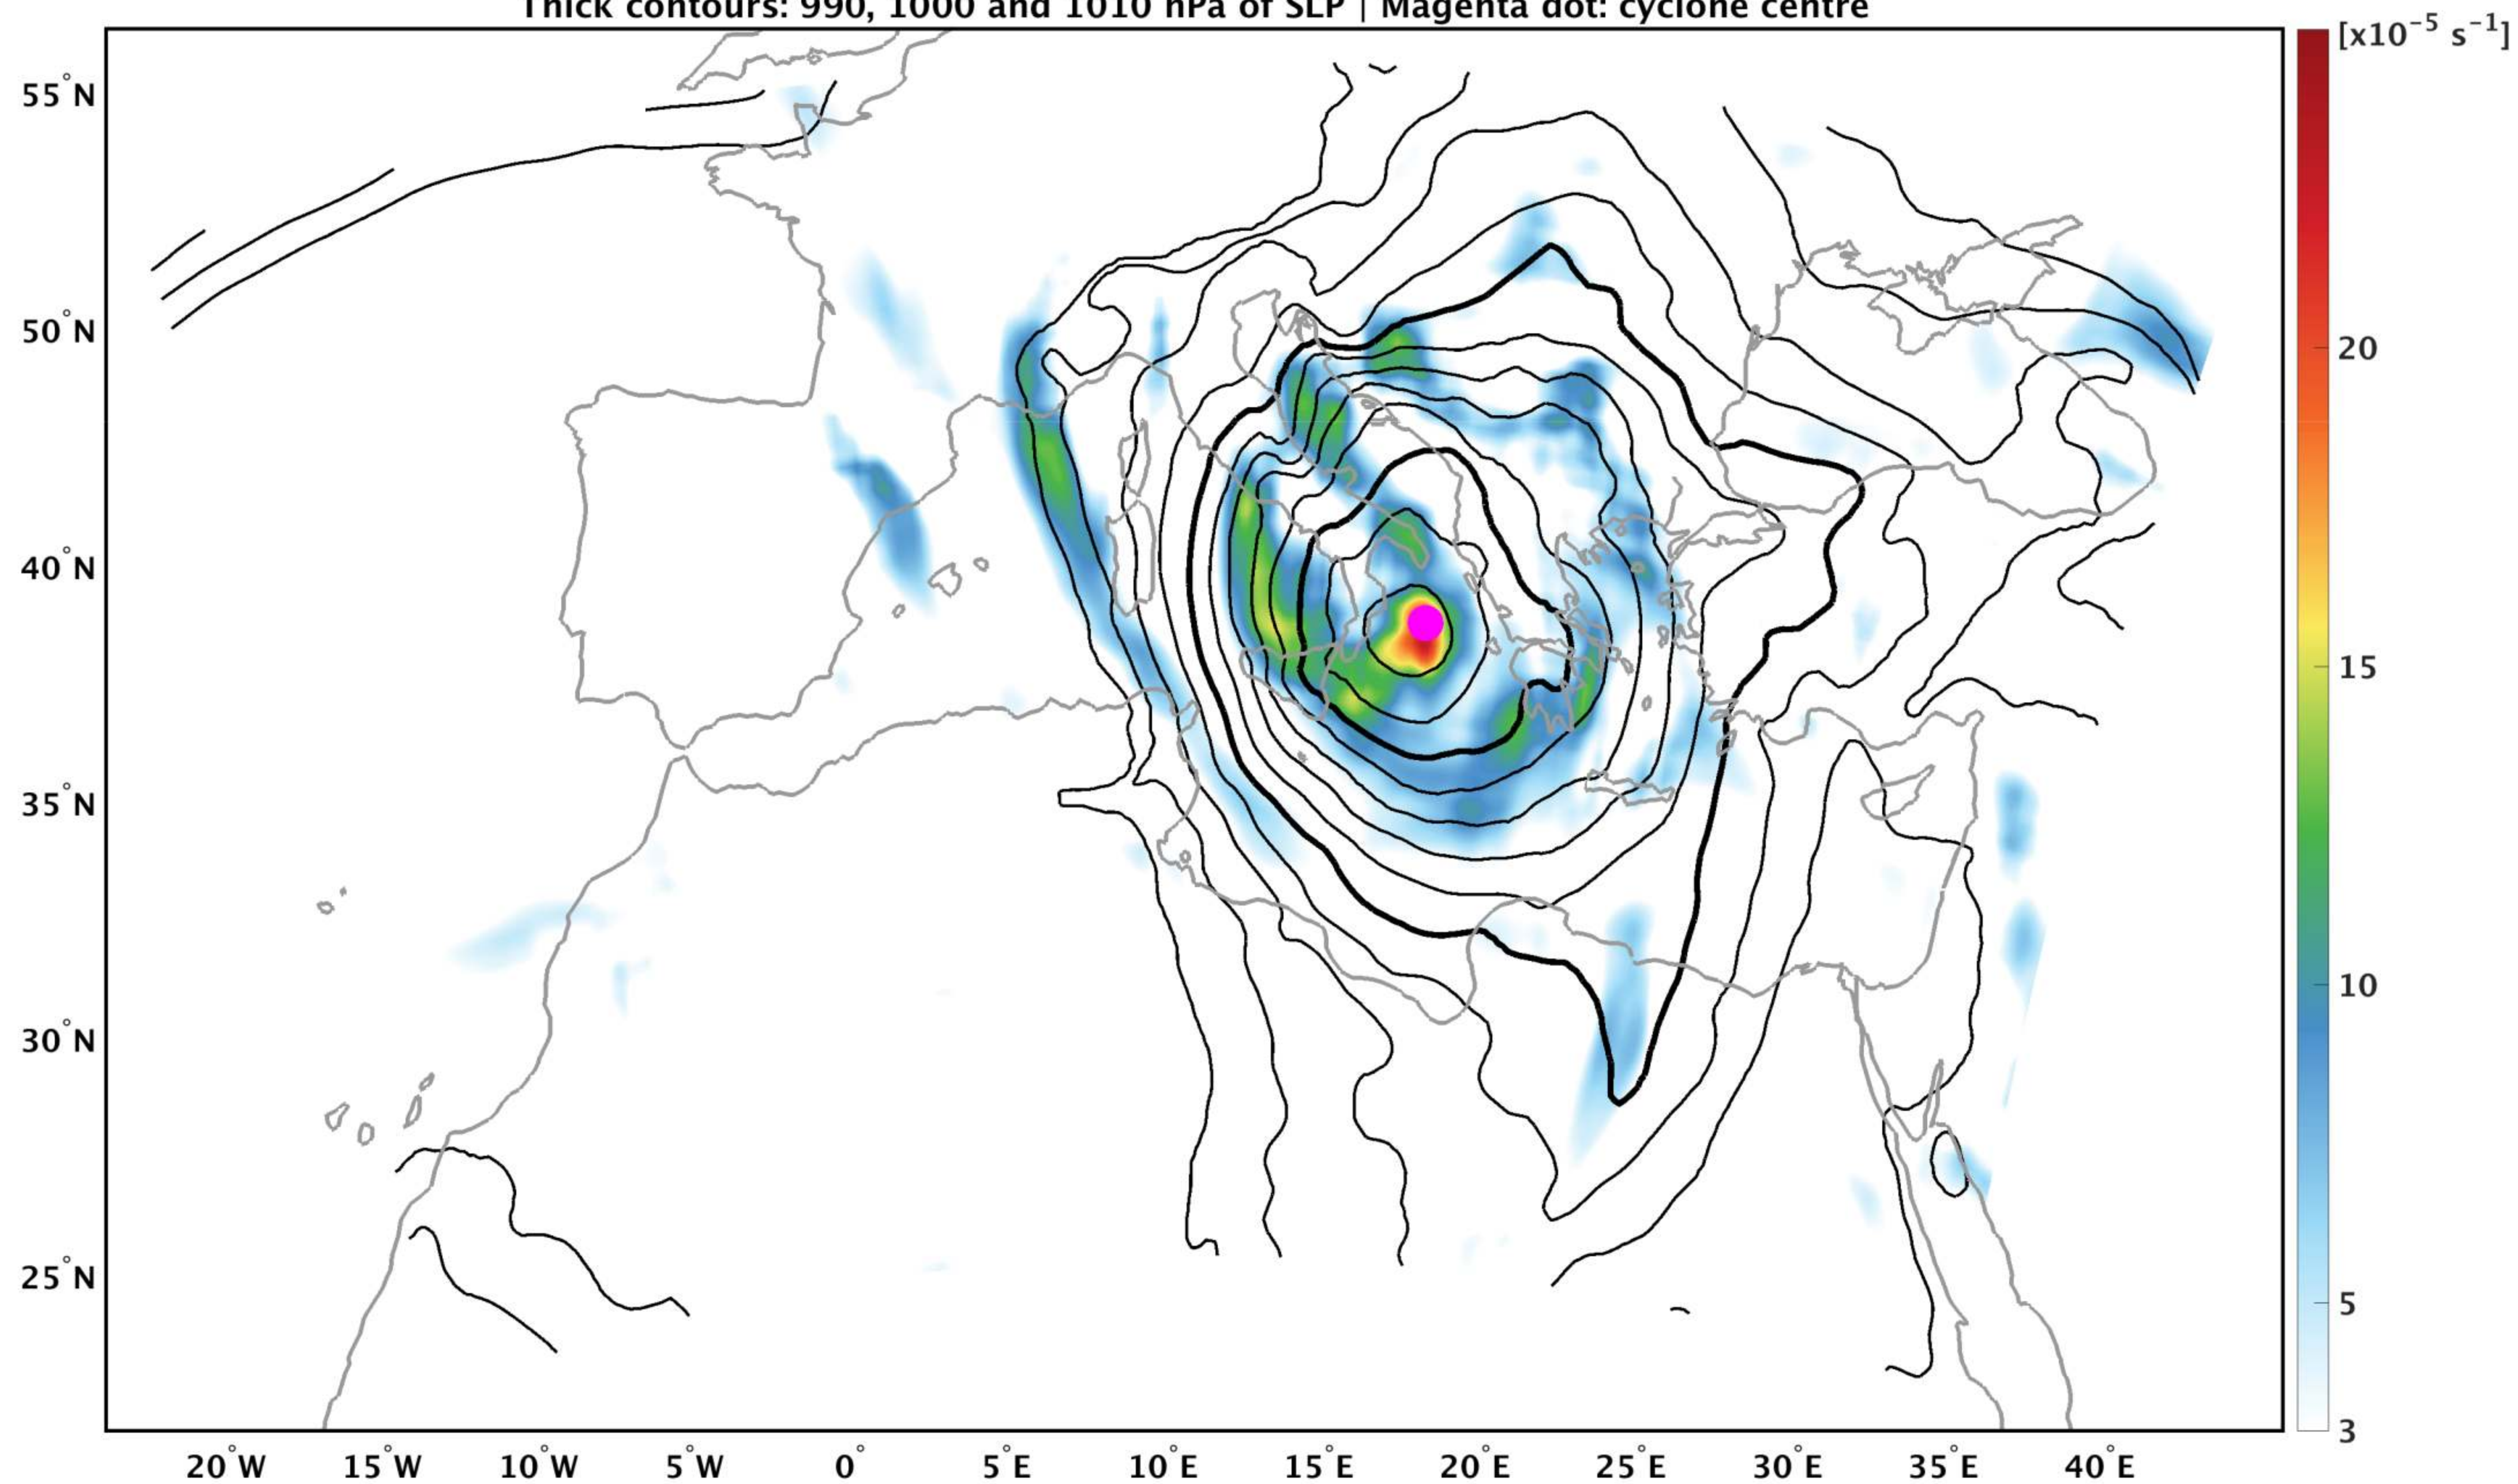



Case-83; Date: 21/3/2009

Colour: Relative vorticity ( $\times 10^{-5}$ ) | Contour: SLP (from 1018 hPa with an interval of 2 hPa)

Thick contours: 990, 1000 and 1010 hPa of SLP | Magenta dot: cyclone centre

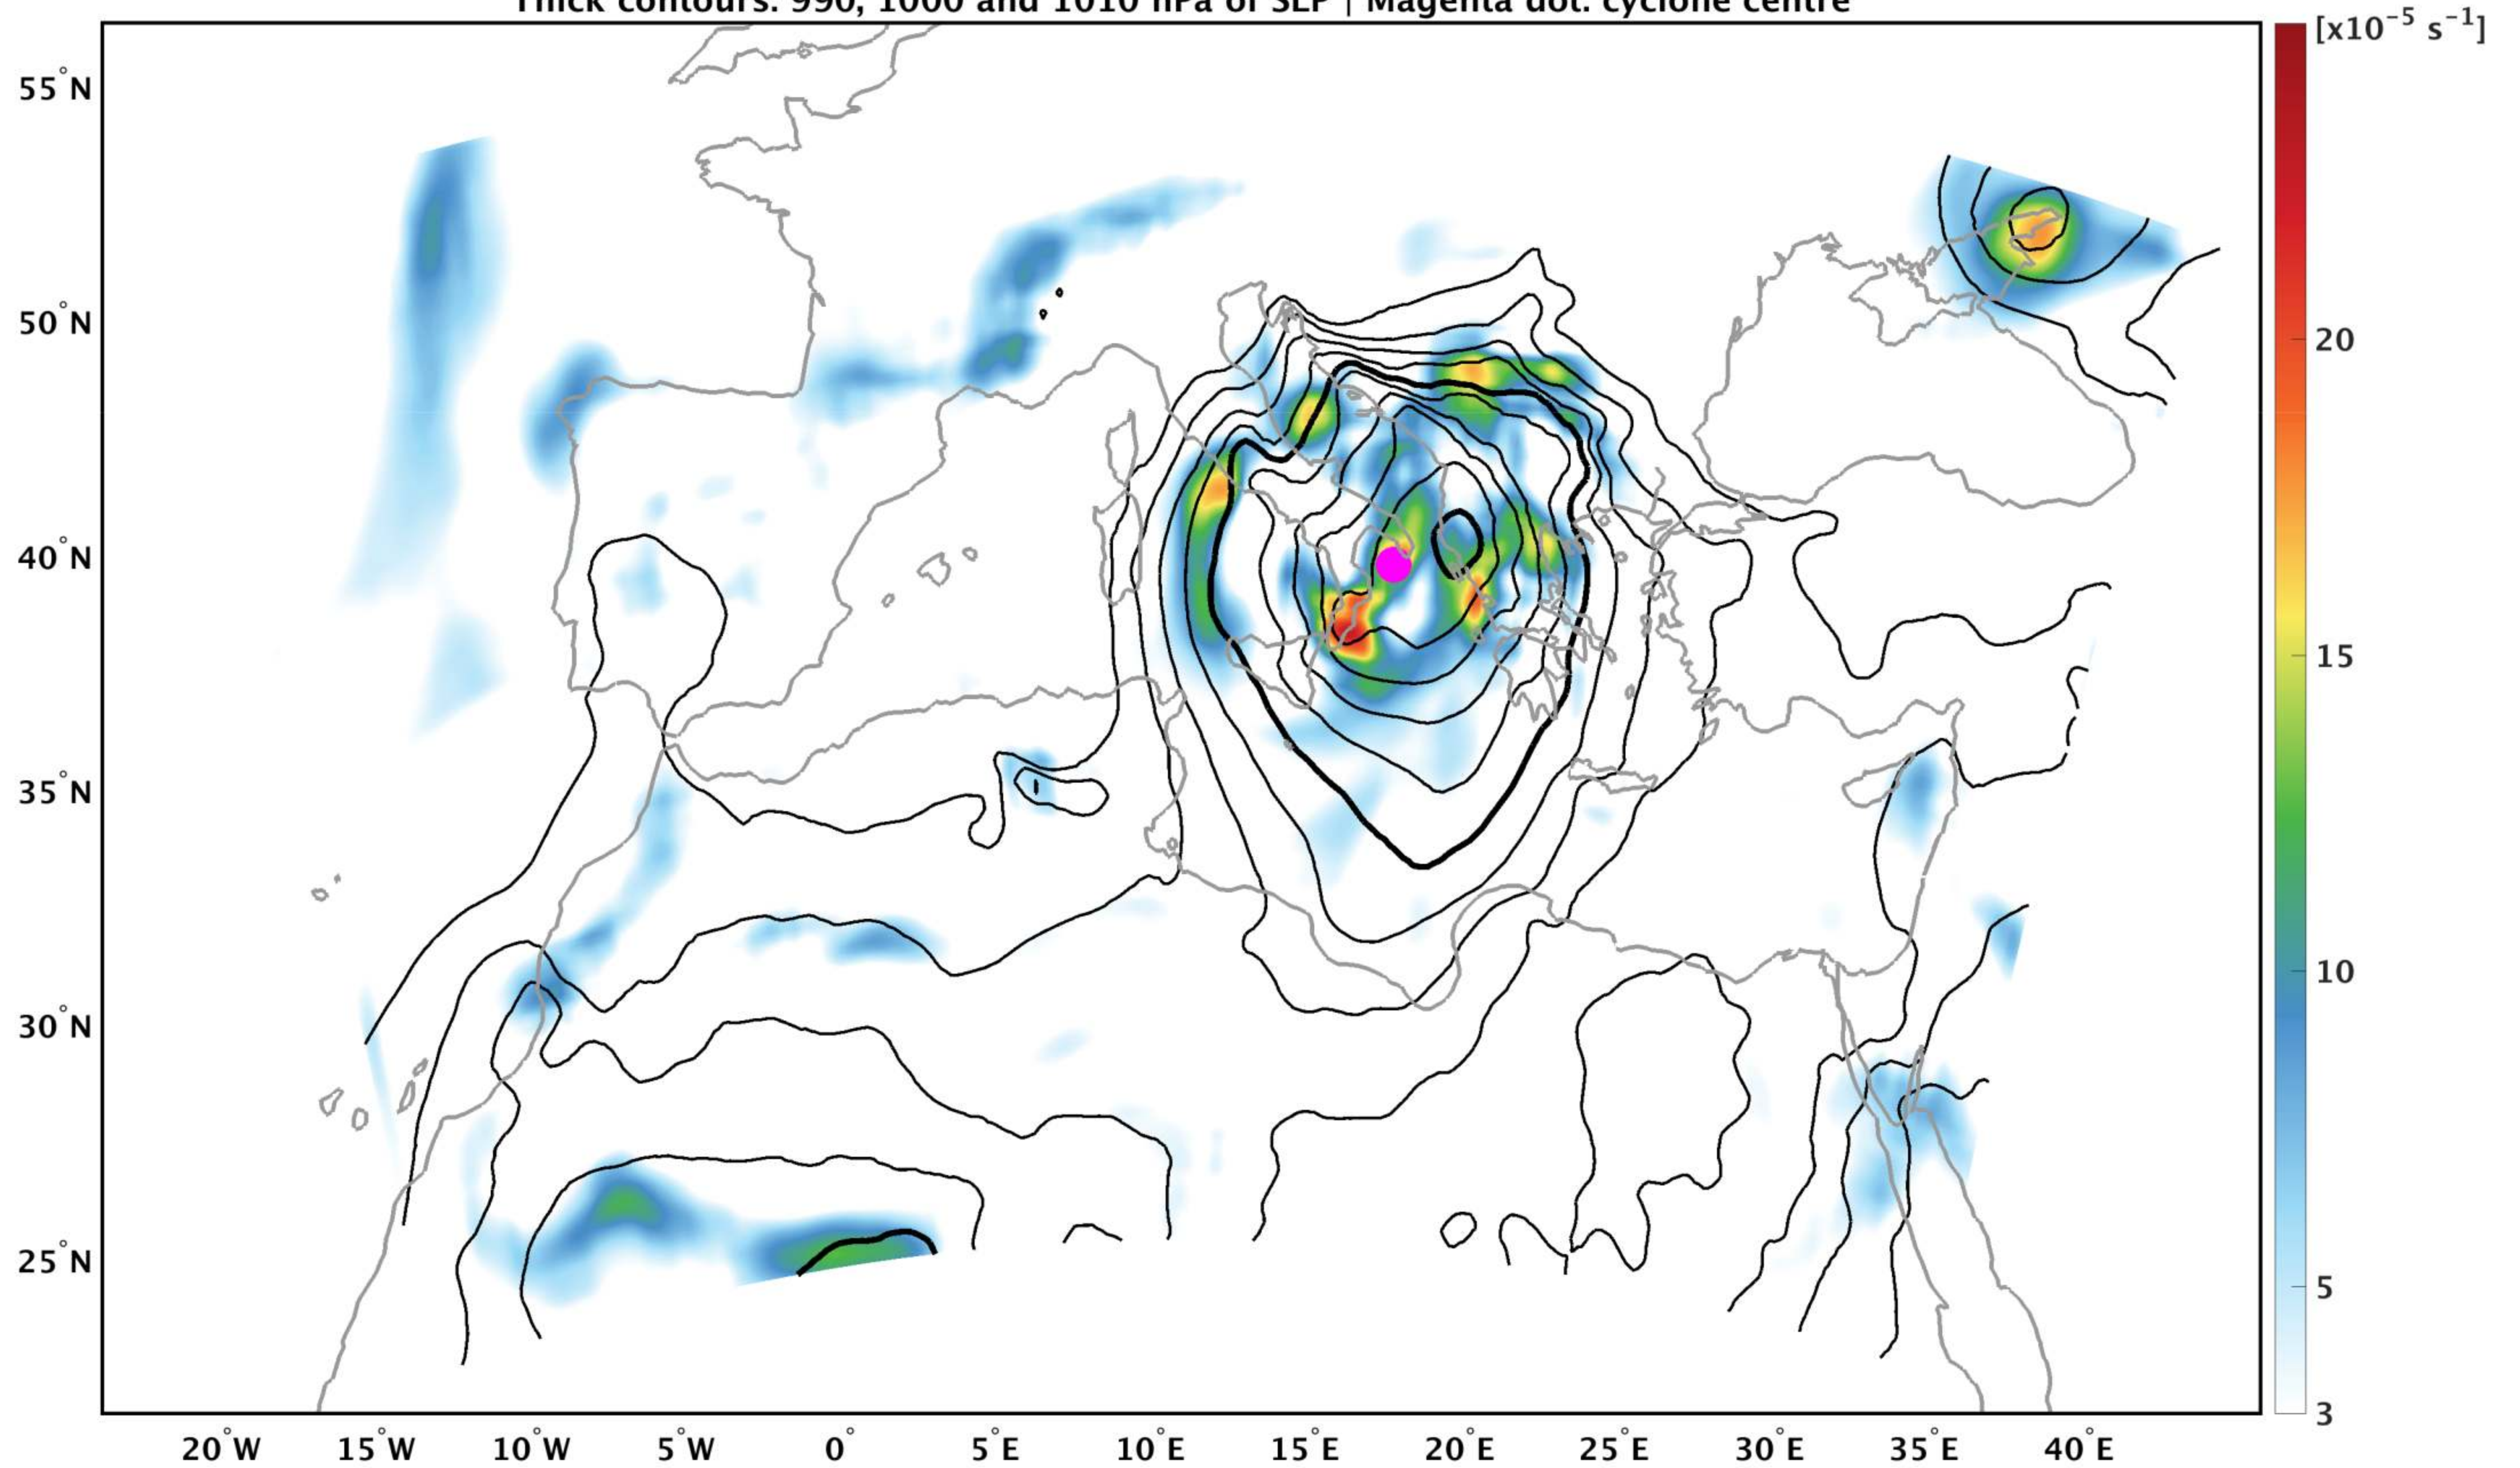



Case-84; Date: 22/12/2011

Colour: Relative vorticity ( $\times 10^{-5}$ ) | Contour: SLP (from 1018 hPa with an interval of 2 hPa)

Thick contours: 990, 1000 and 1010 hPa of SLP | Magenta dot: cyclone centre

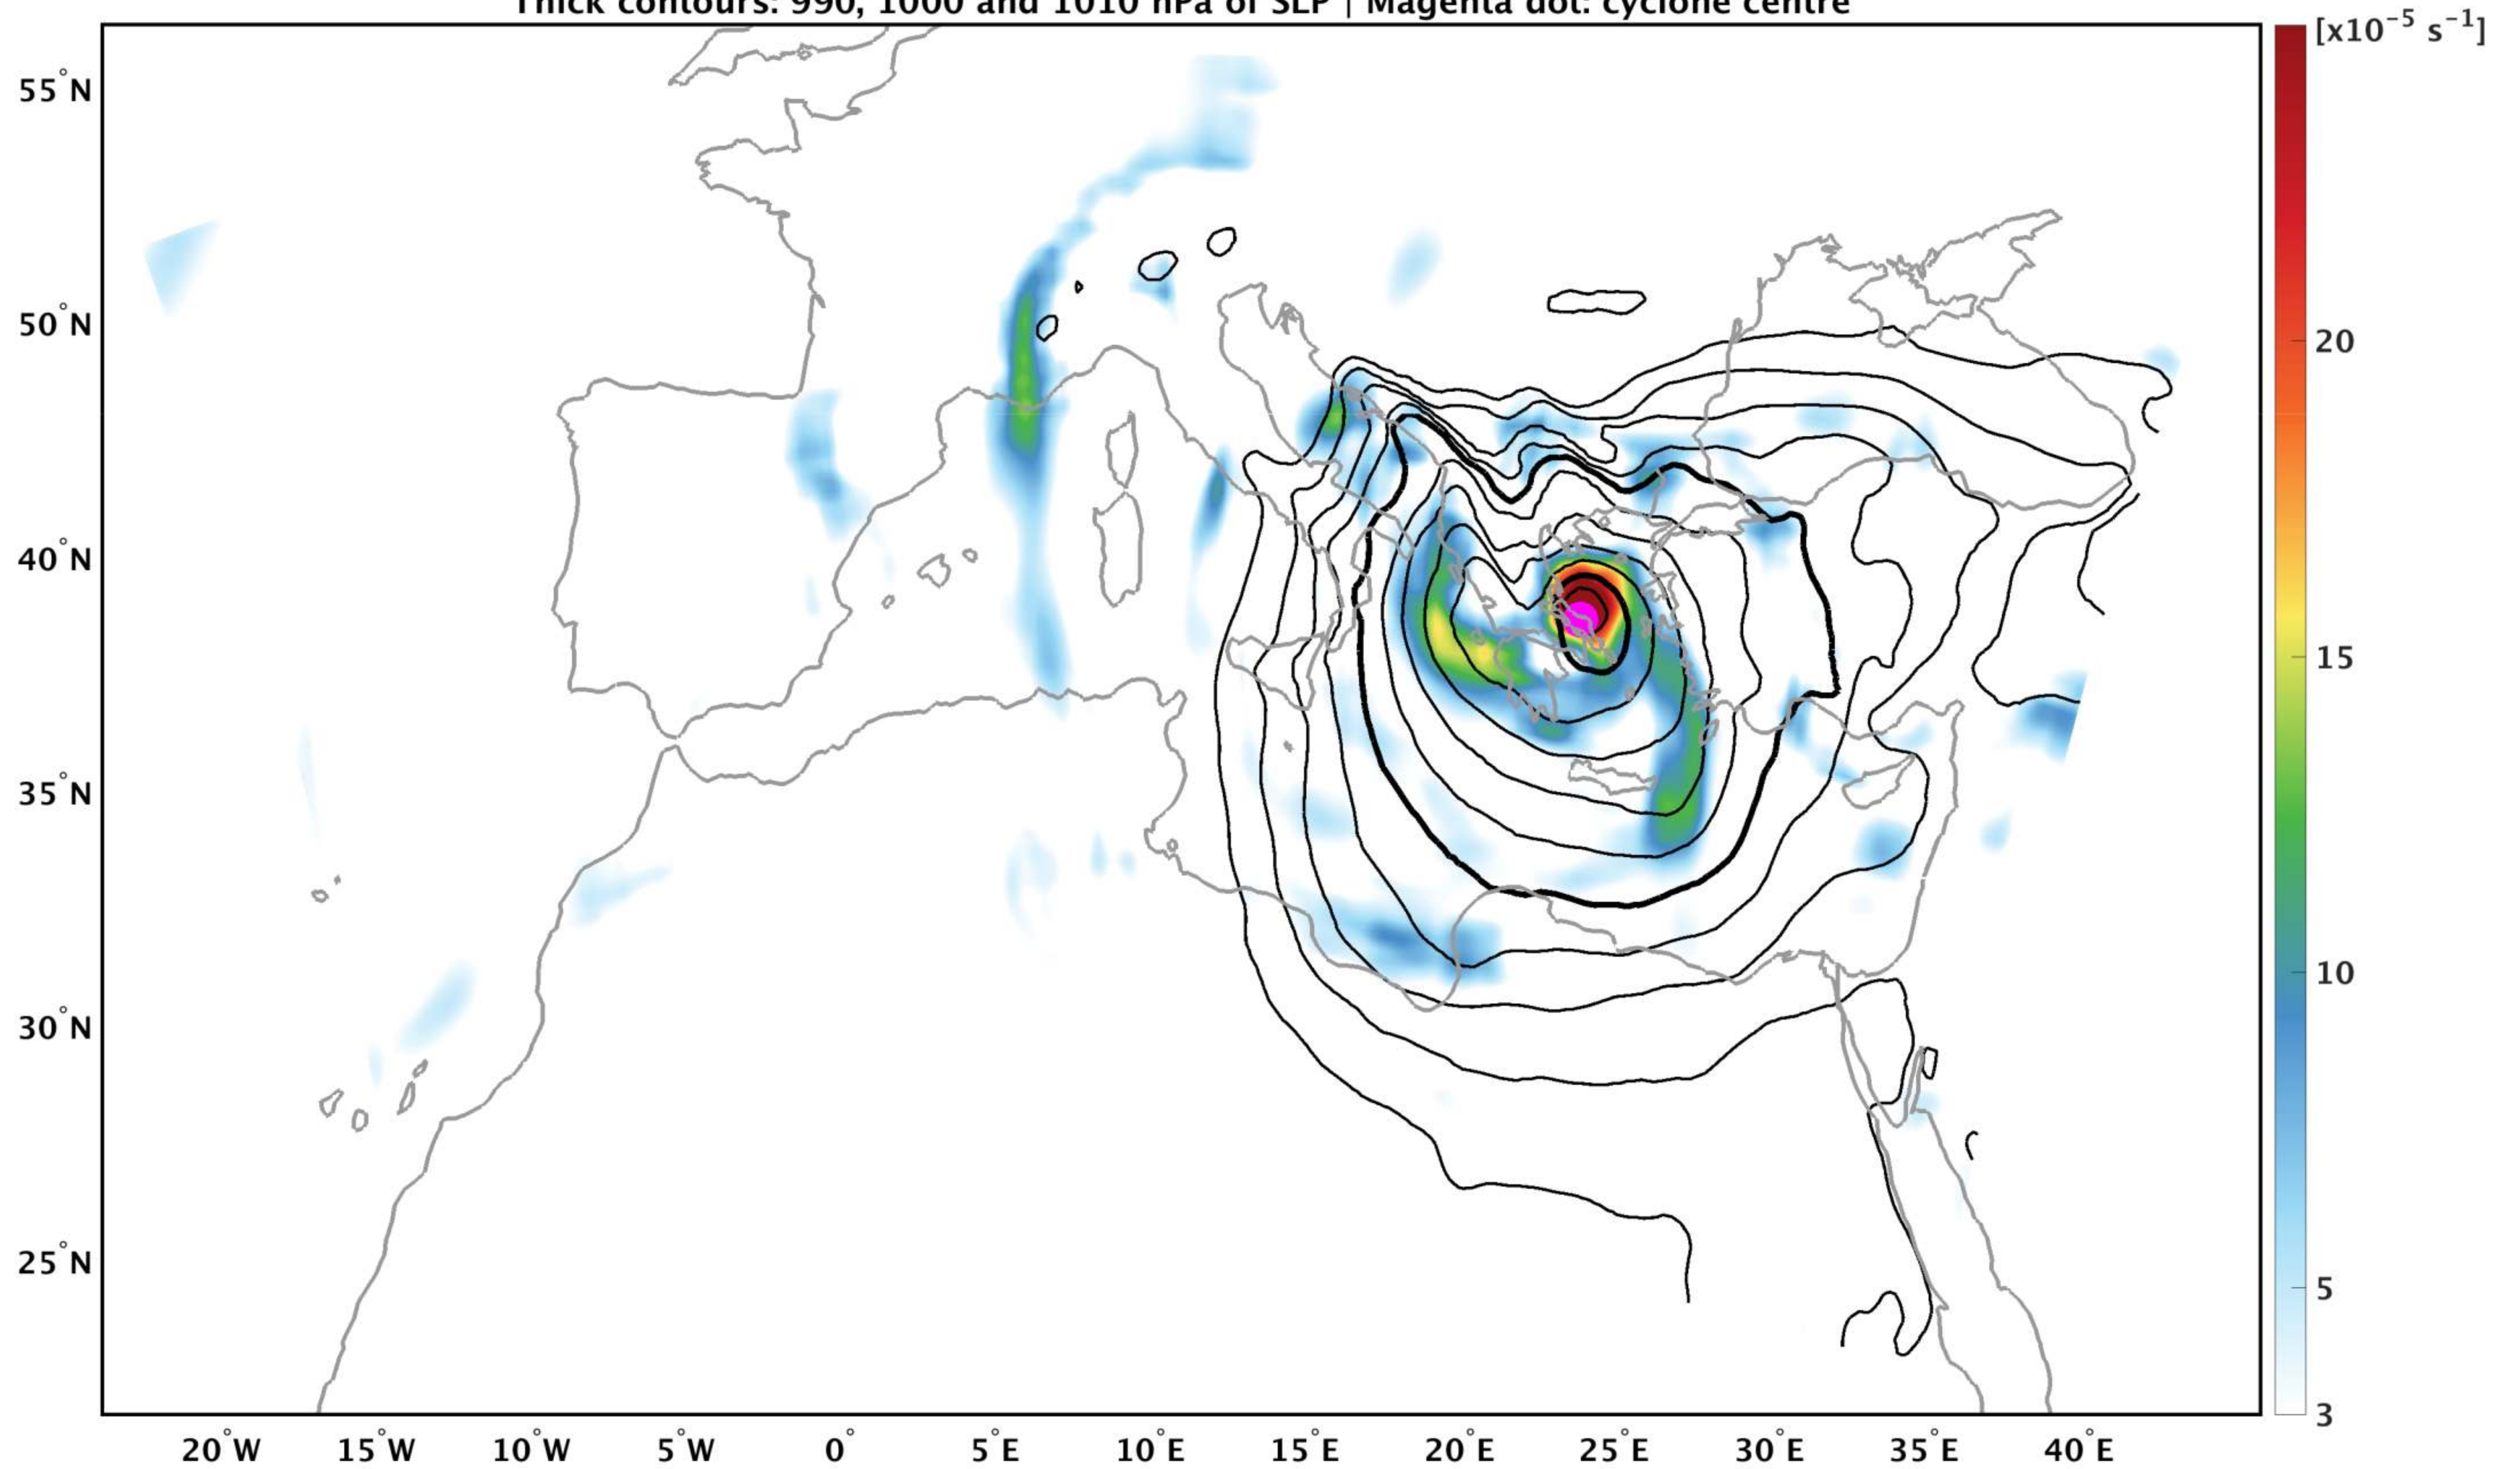



Case-85; Date: 7/4/2013

Colour: Relative vorticity ( $\times 10^{-5}$ ) | Contour: SLP (from 1018 hPa with an interval of 2 hPa)

Thick contours: 990, 1000 and 1010 hPa of SLP | Magenta dot: cyclone centre

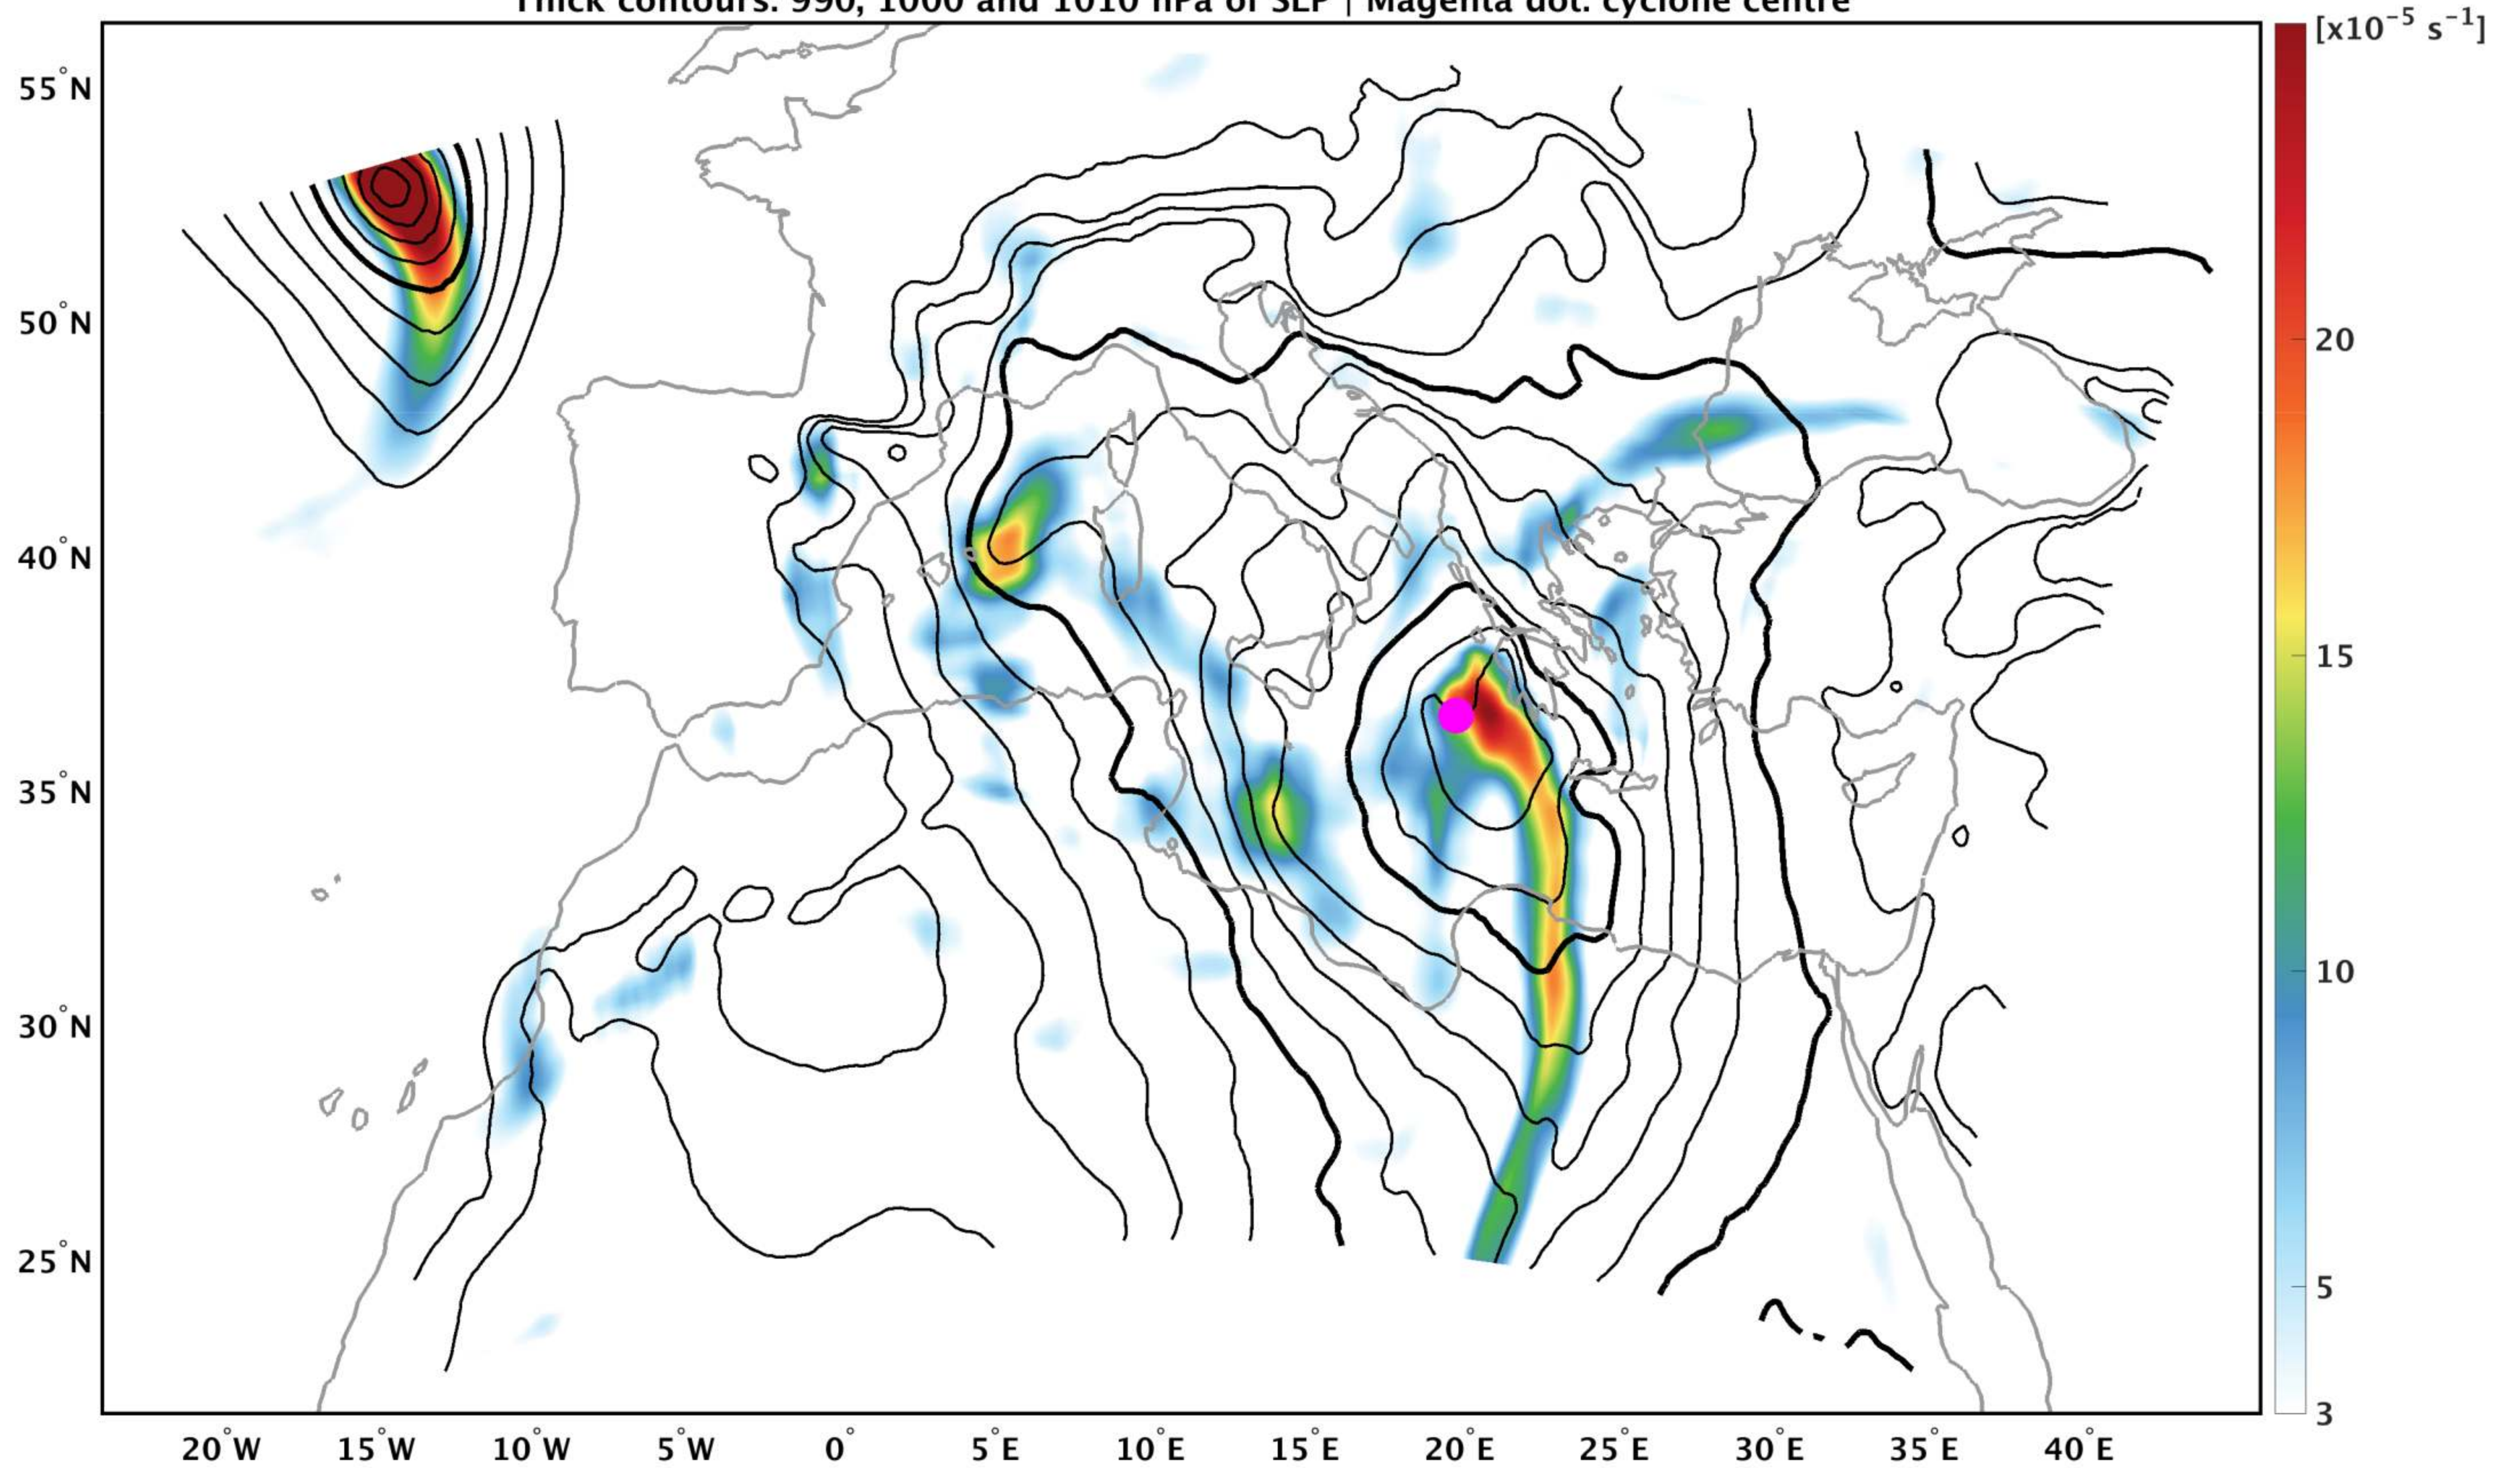



Case-86; Date: 27/2/2016

Colour: Relative vorticity ( $\times 10^{-5}$ ) | Contour: SLP (from 1018 hPa with an interval of 2 hPa)

Thick contours: 990, 1000 and 1010 hPa of SLP | Magenta dot: cyclone centre

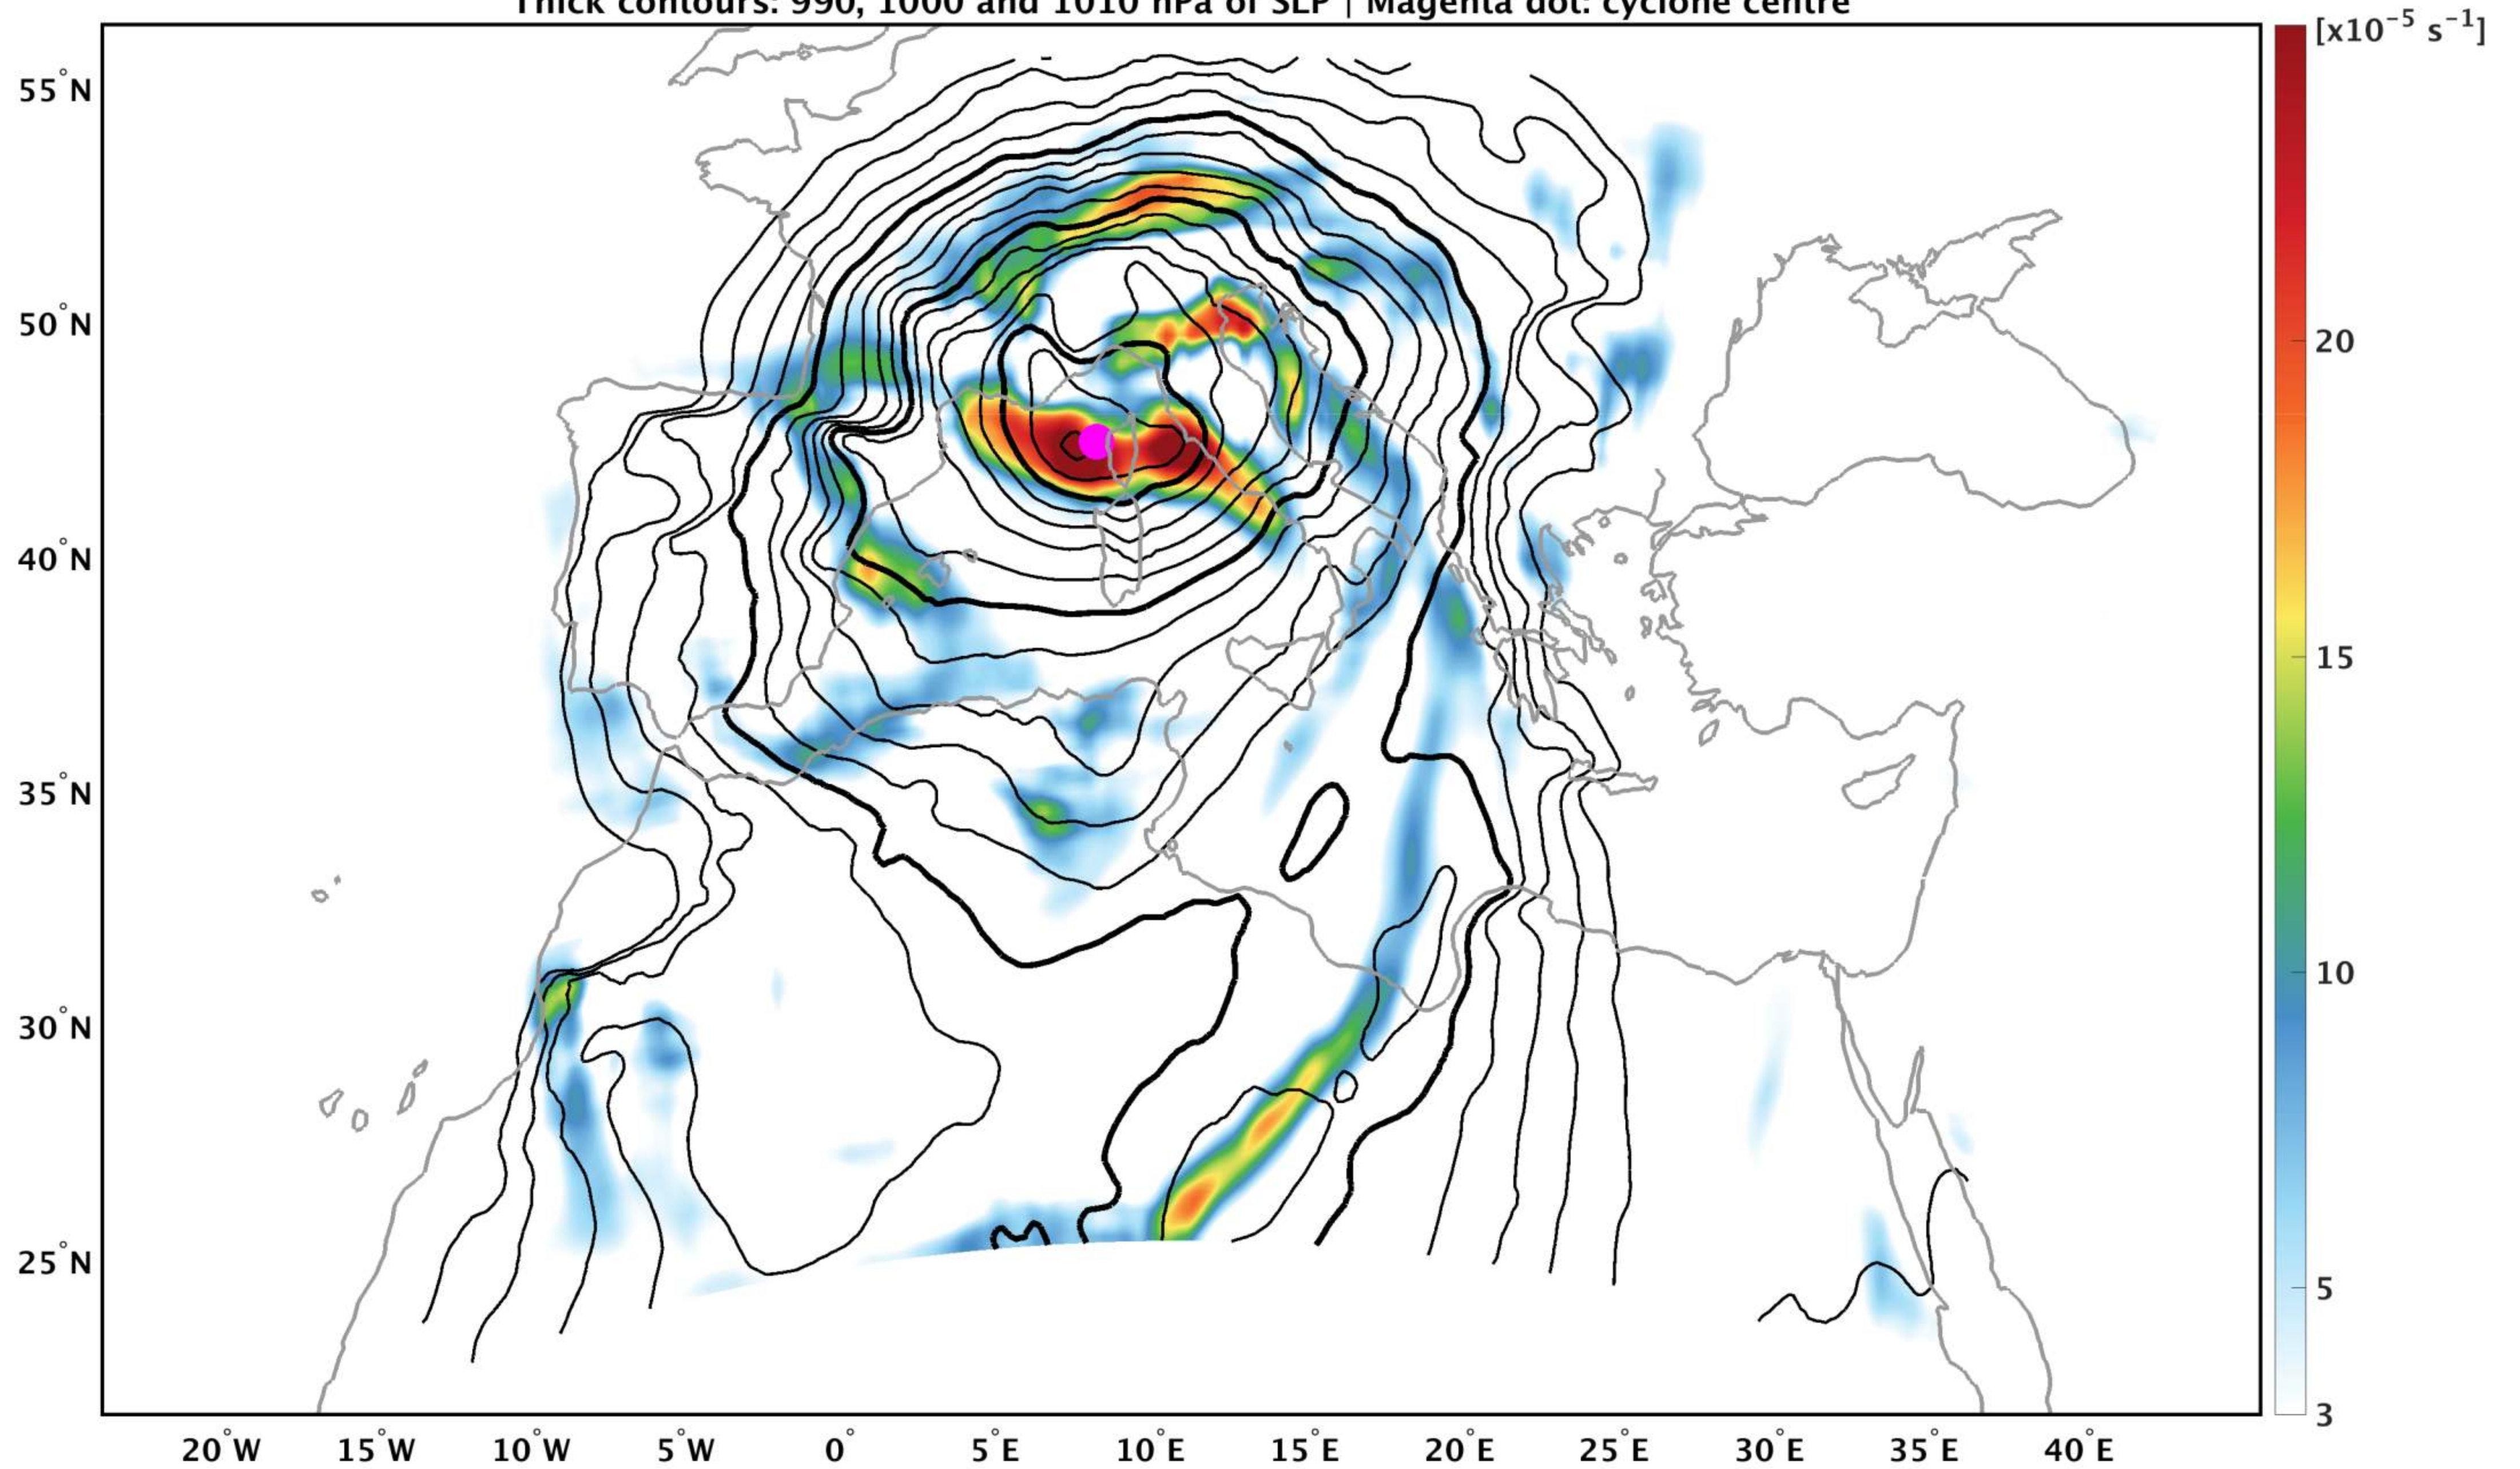



Case-87; Date: 14/9/2012

Colour: Relative vorticity ( $\times 10^{-5}$ ) | Contour: SLP (from 1018 hPa with an interval of 2 hPa)

Thick contours: 990, 1000 and 1010 hPa of SLP | Magenta dot: cyclone centre

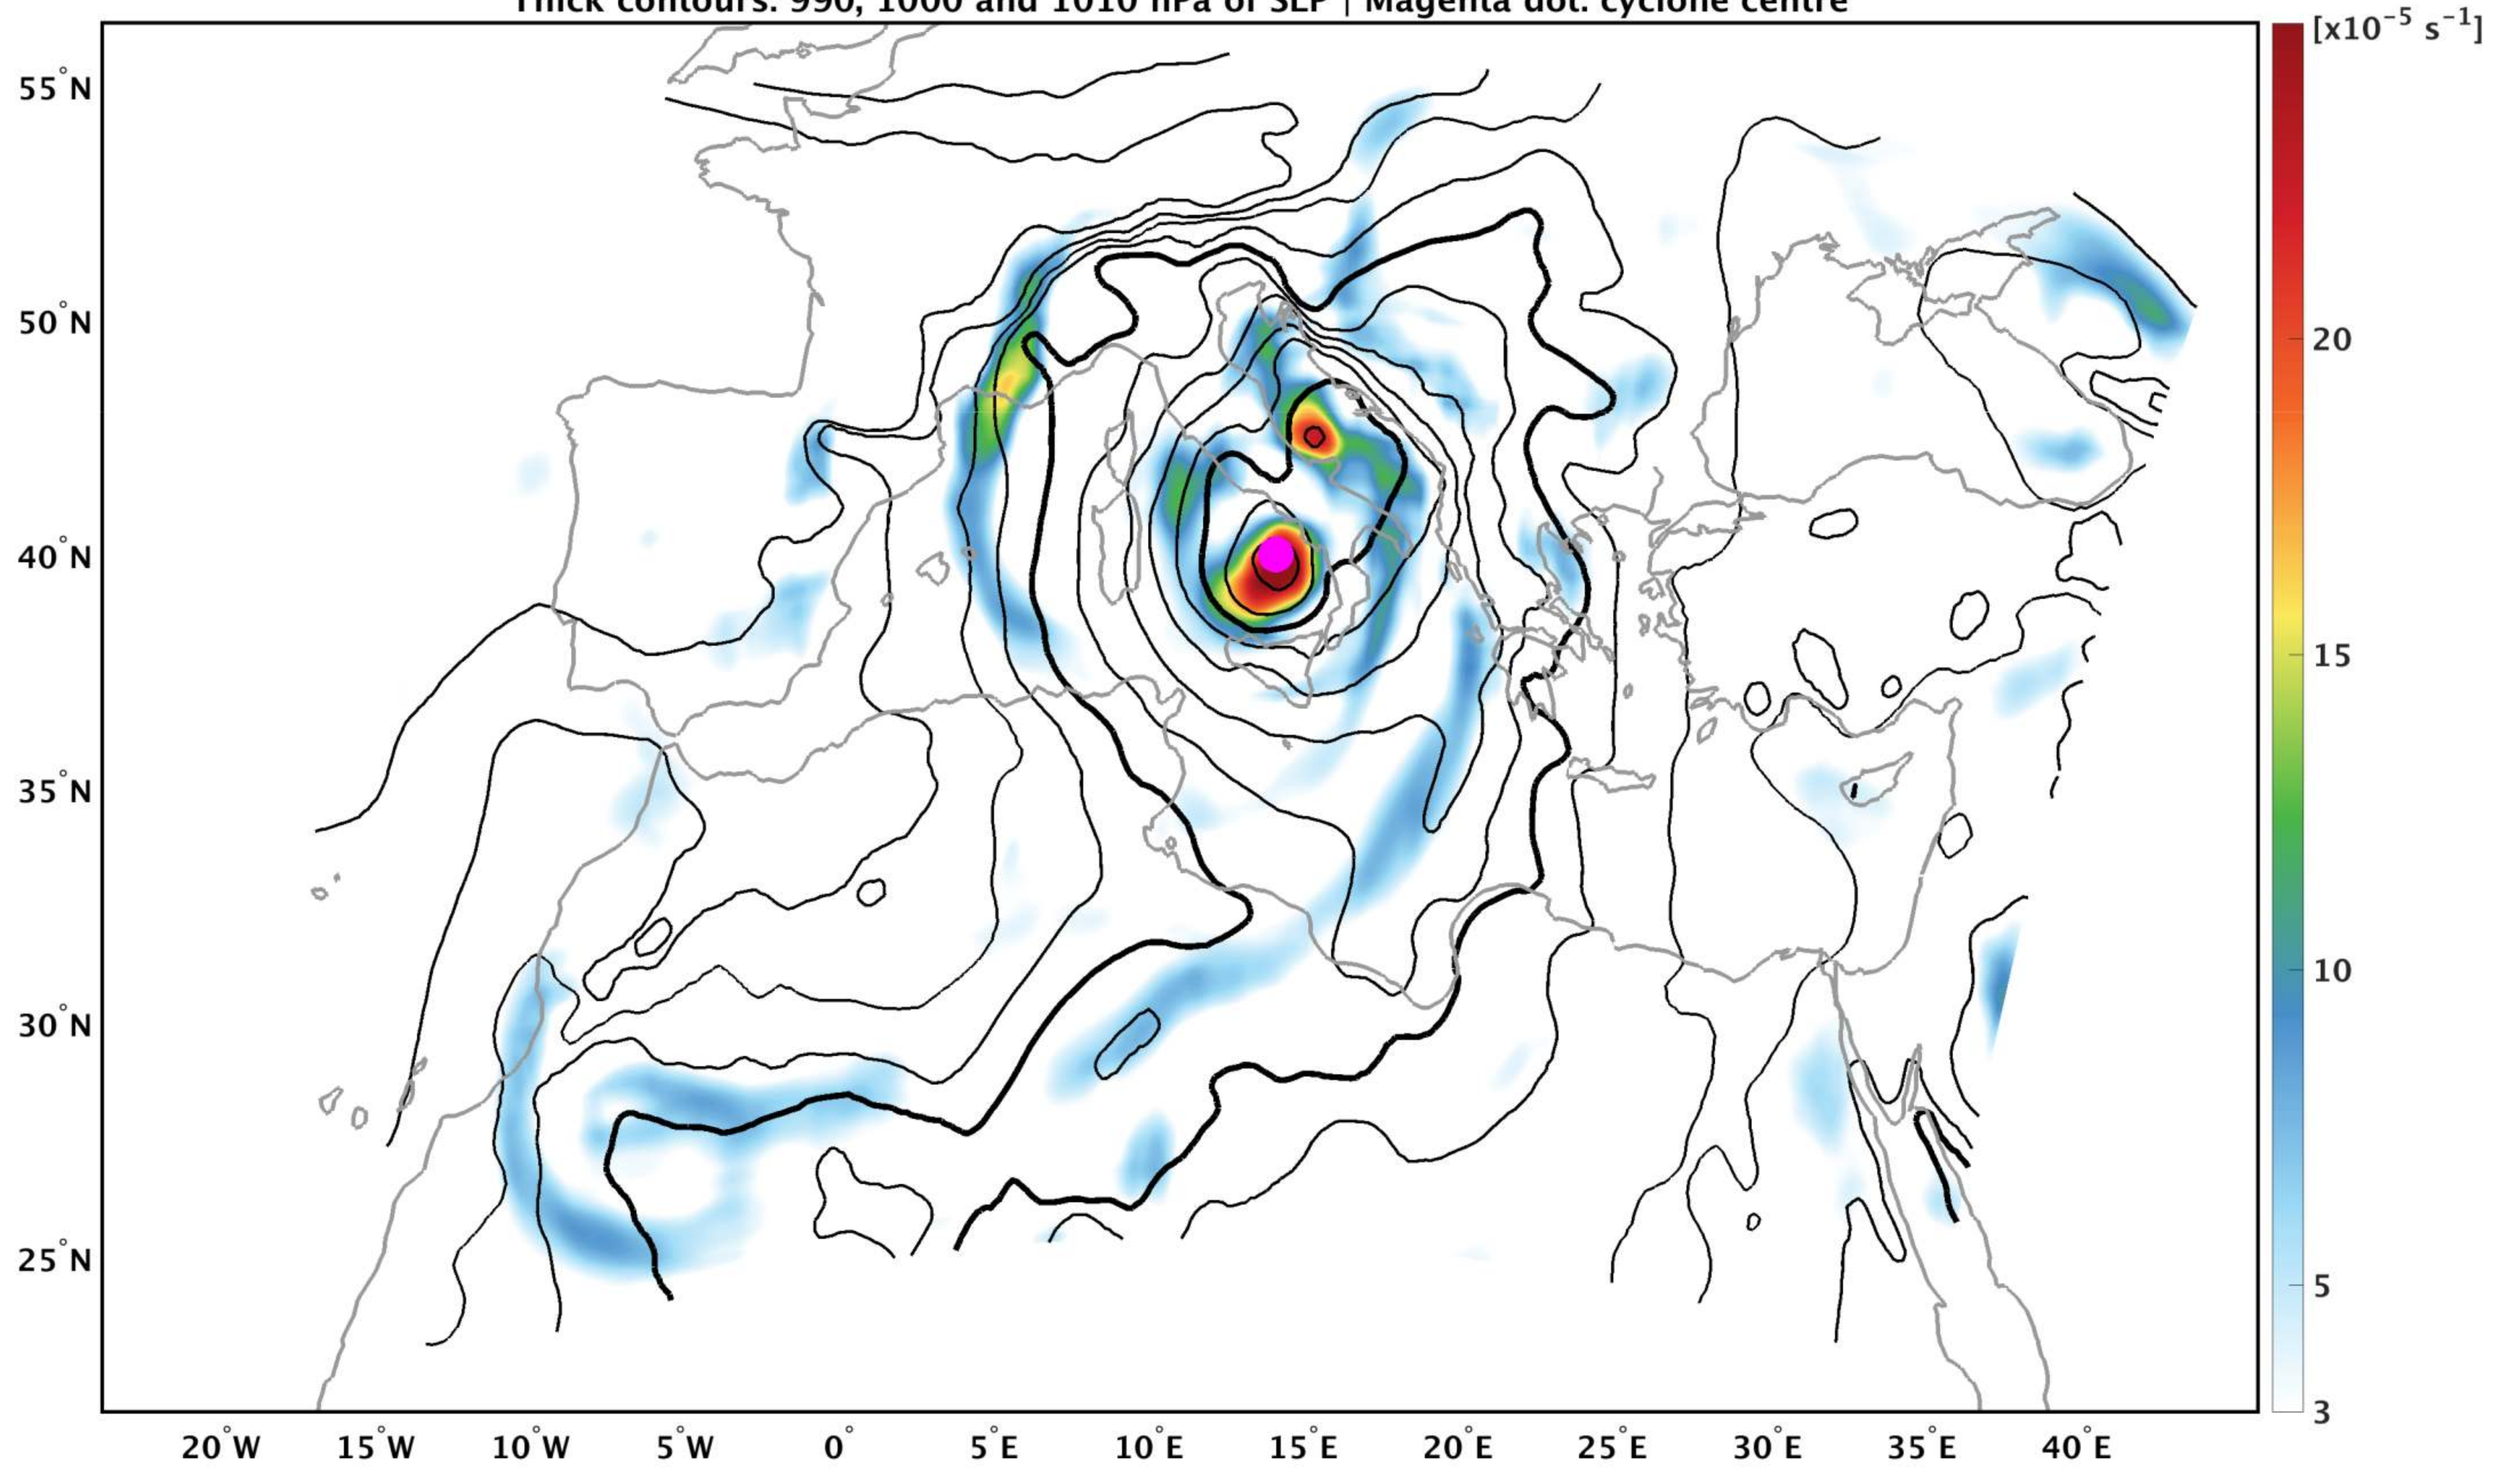



Case-88; Date: 13/3/2014

Colour: Relative vorticity ( $\times 10^{-5}$ ) | Contour: SLP (from 1018 hPa with an interval of 2 hPa)

Thick contours: 990, 1000 and 1010 hPa of SLP | Magenta dot: cyclone centre

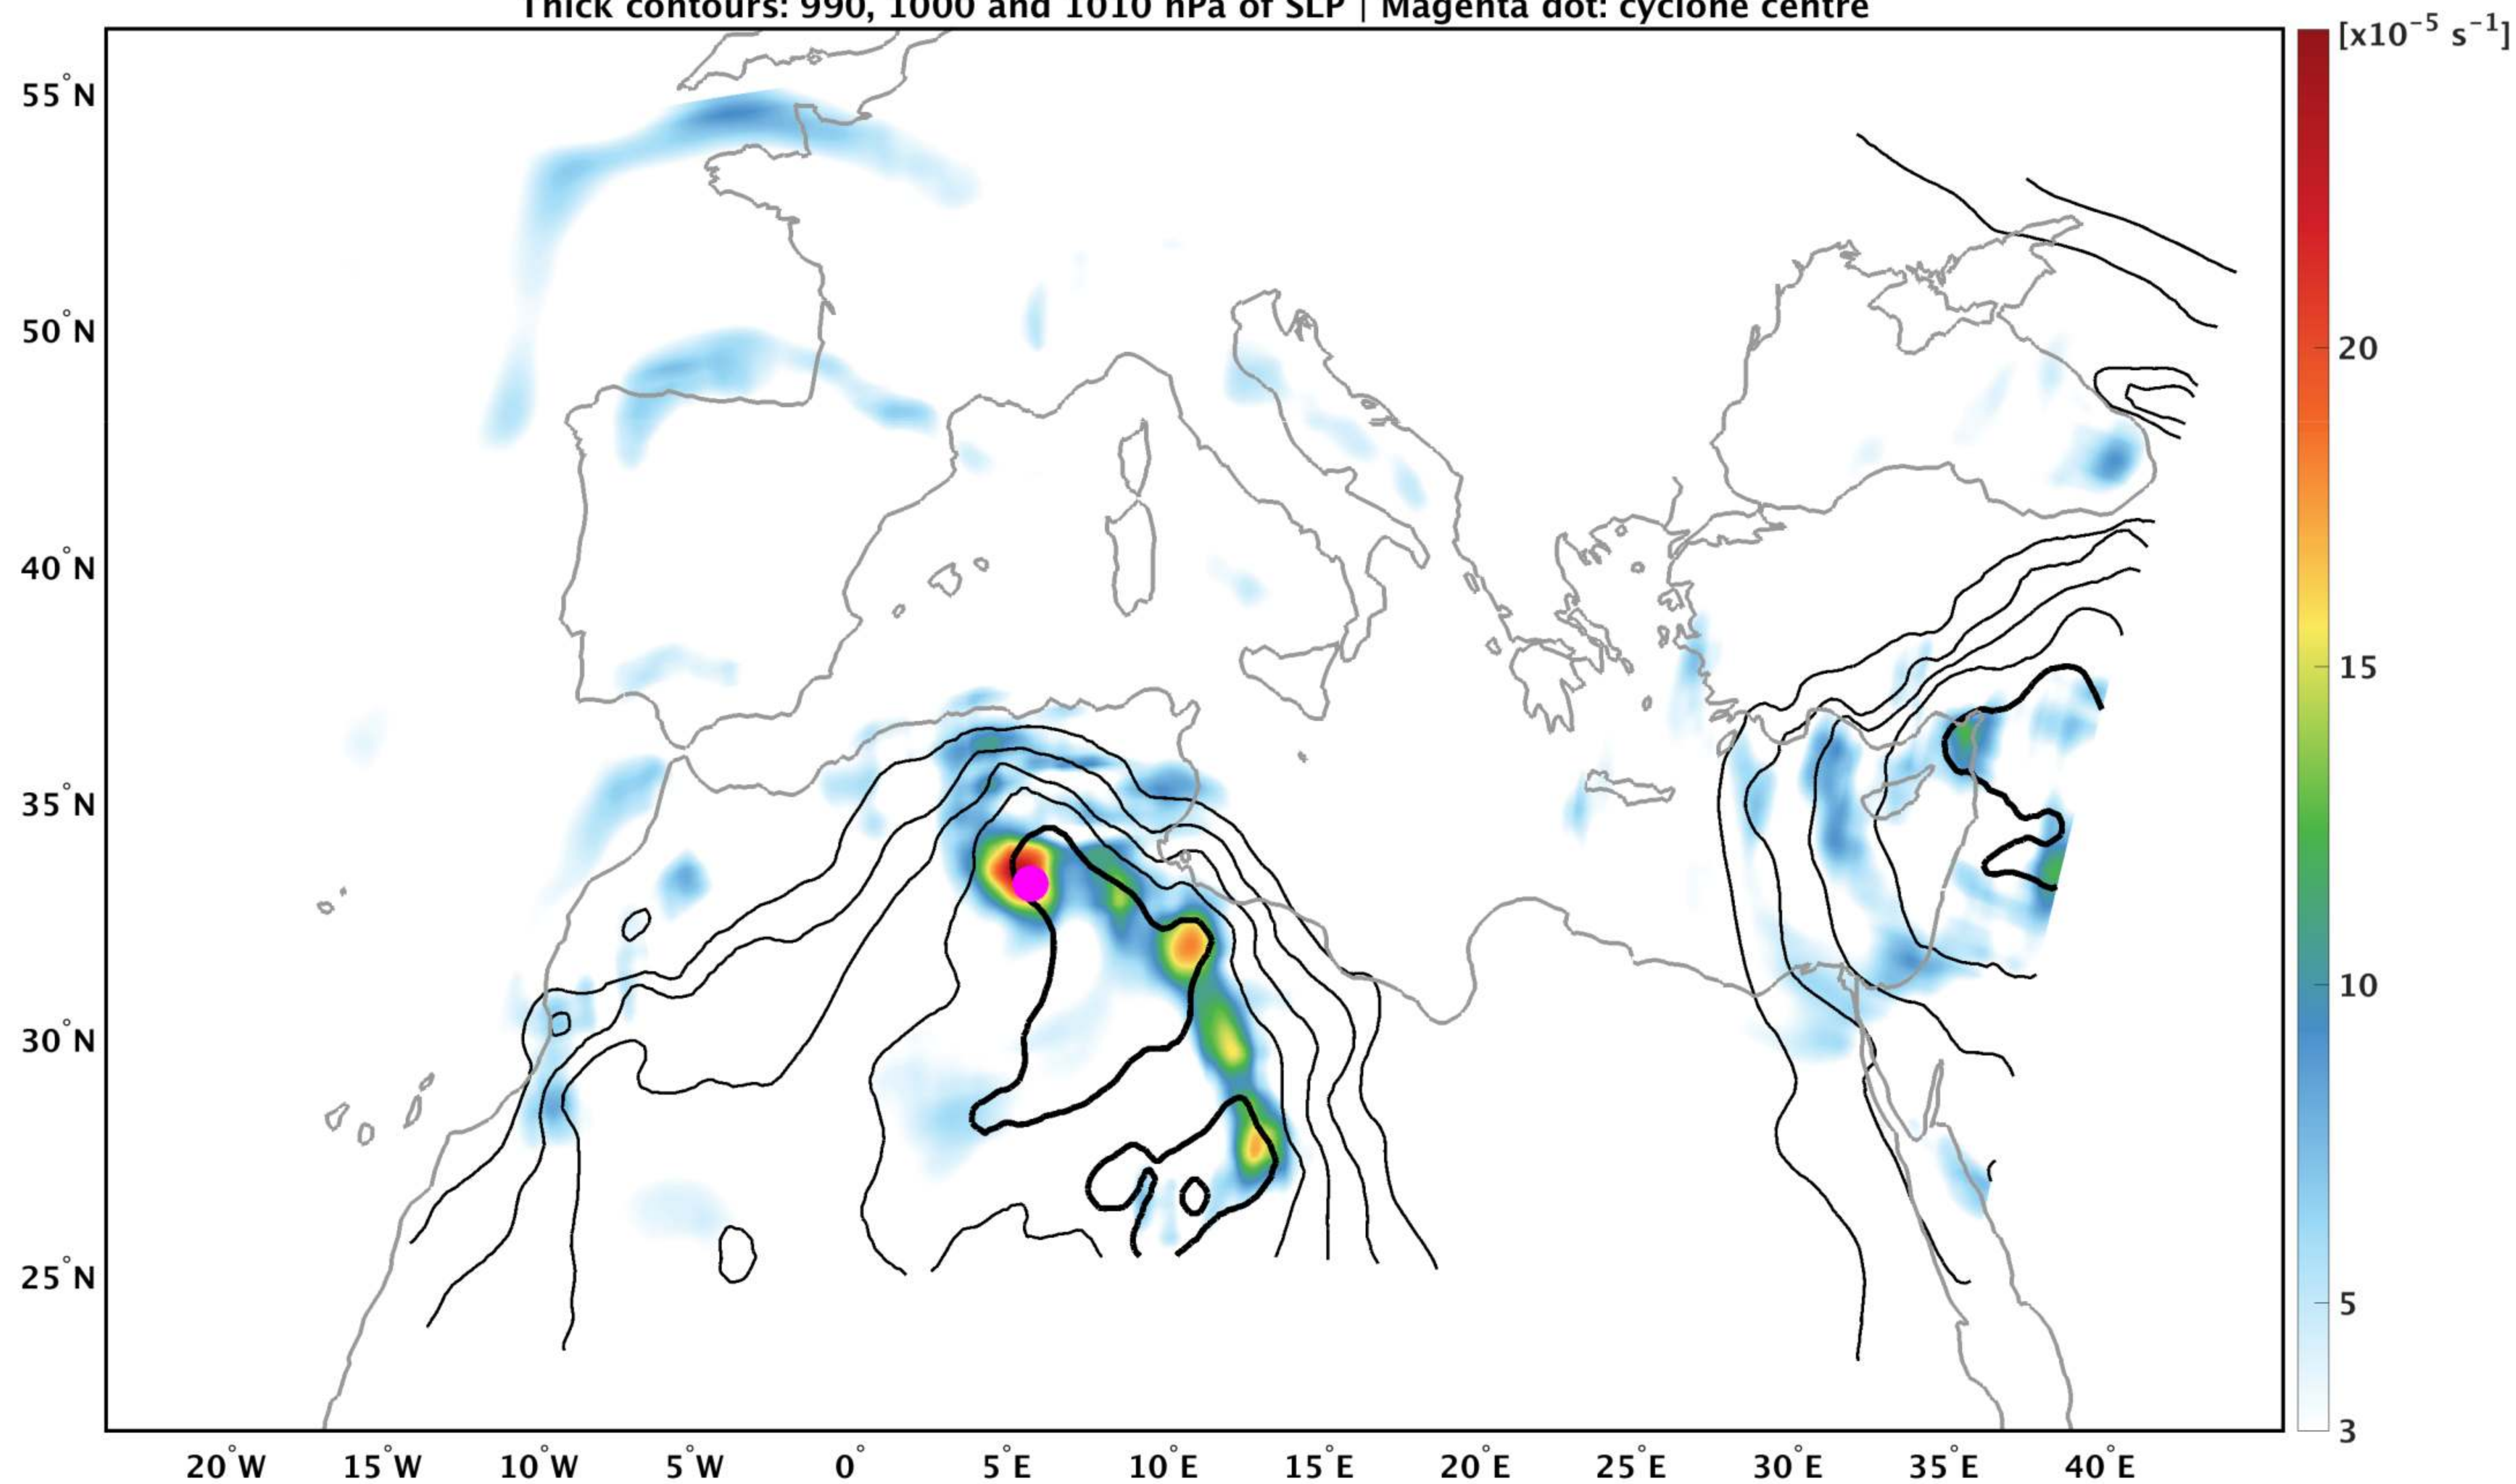



Case-89; Date: 11/11/2017

Colour: Relative vorticity ( $\times 10^{-5}$ ) | Contour: SLP (from 1018 hPa with an interval of 2 hPa)

Thick contours: 990, 1000 and 1010 hPa of SLP | Magenta dot: cyclone centre

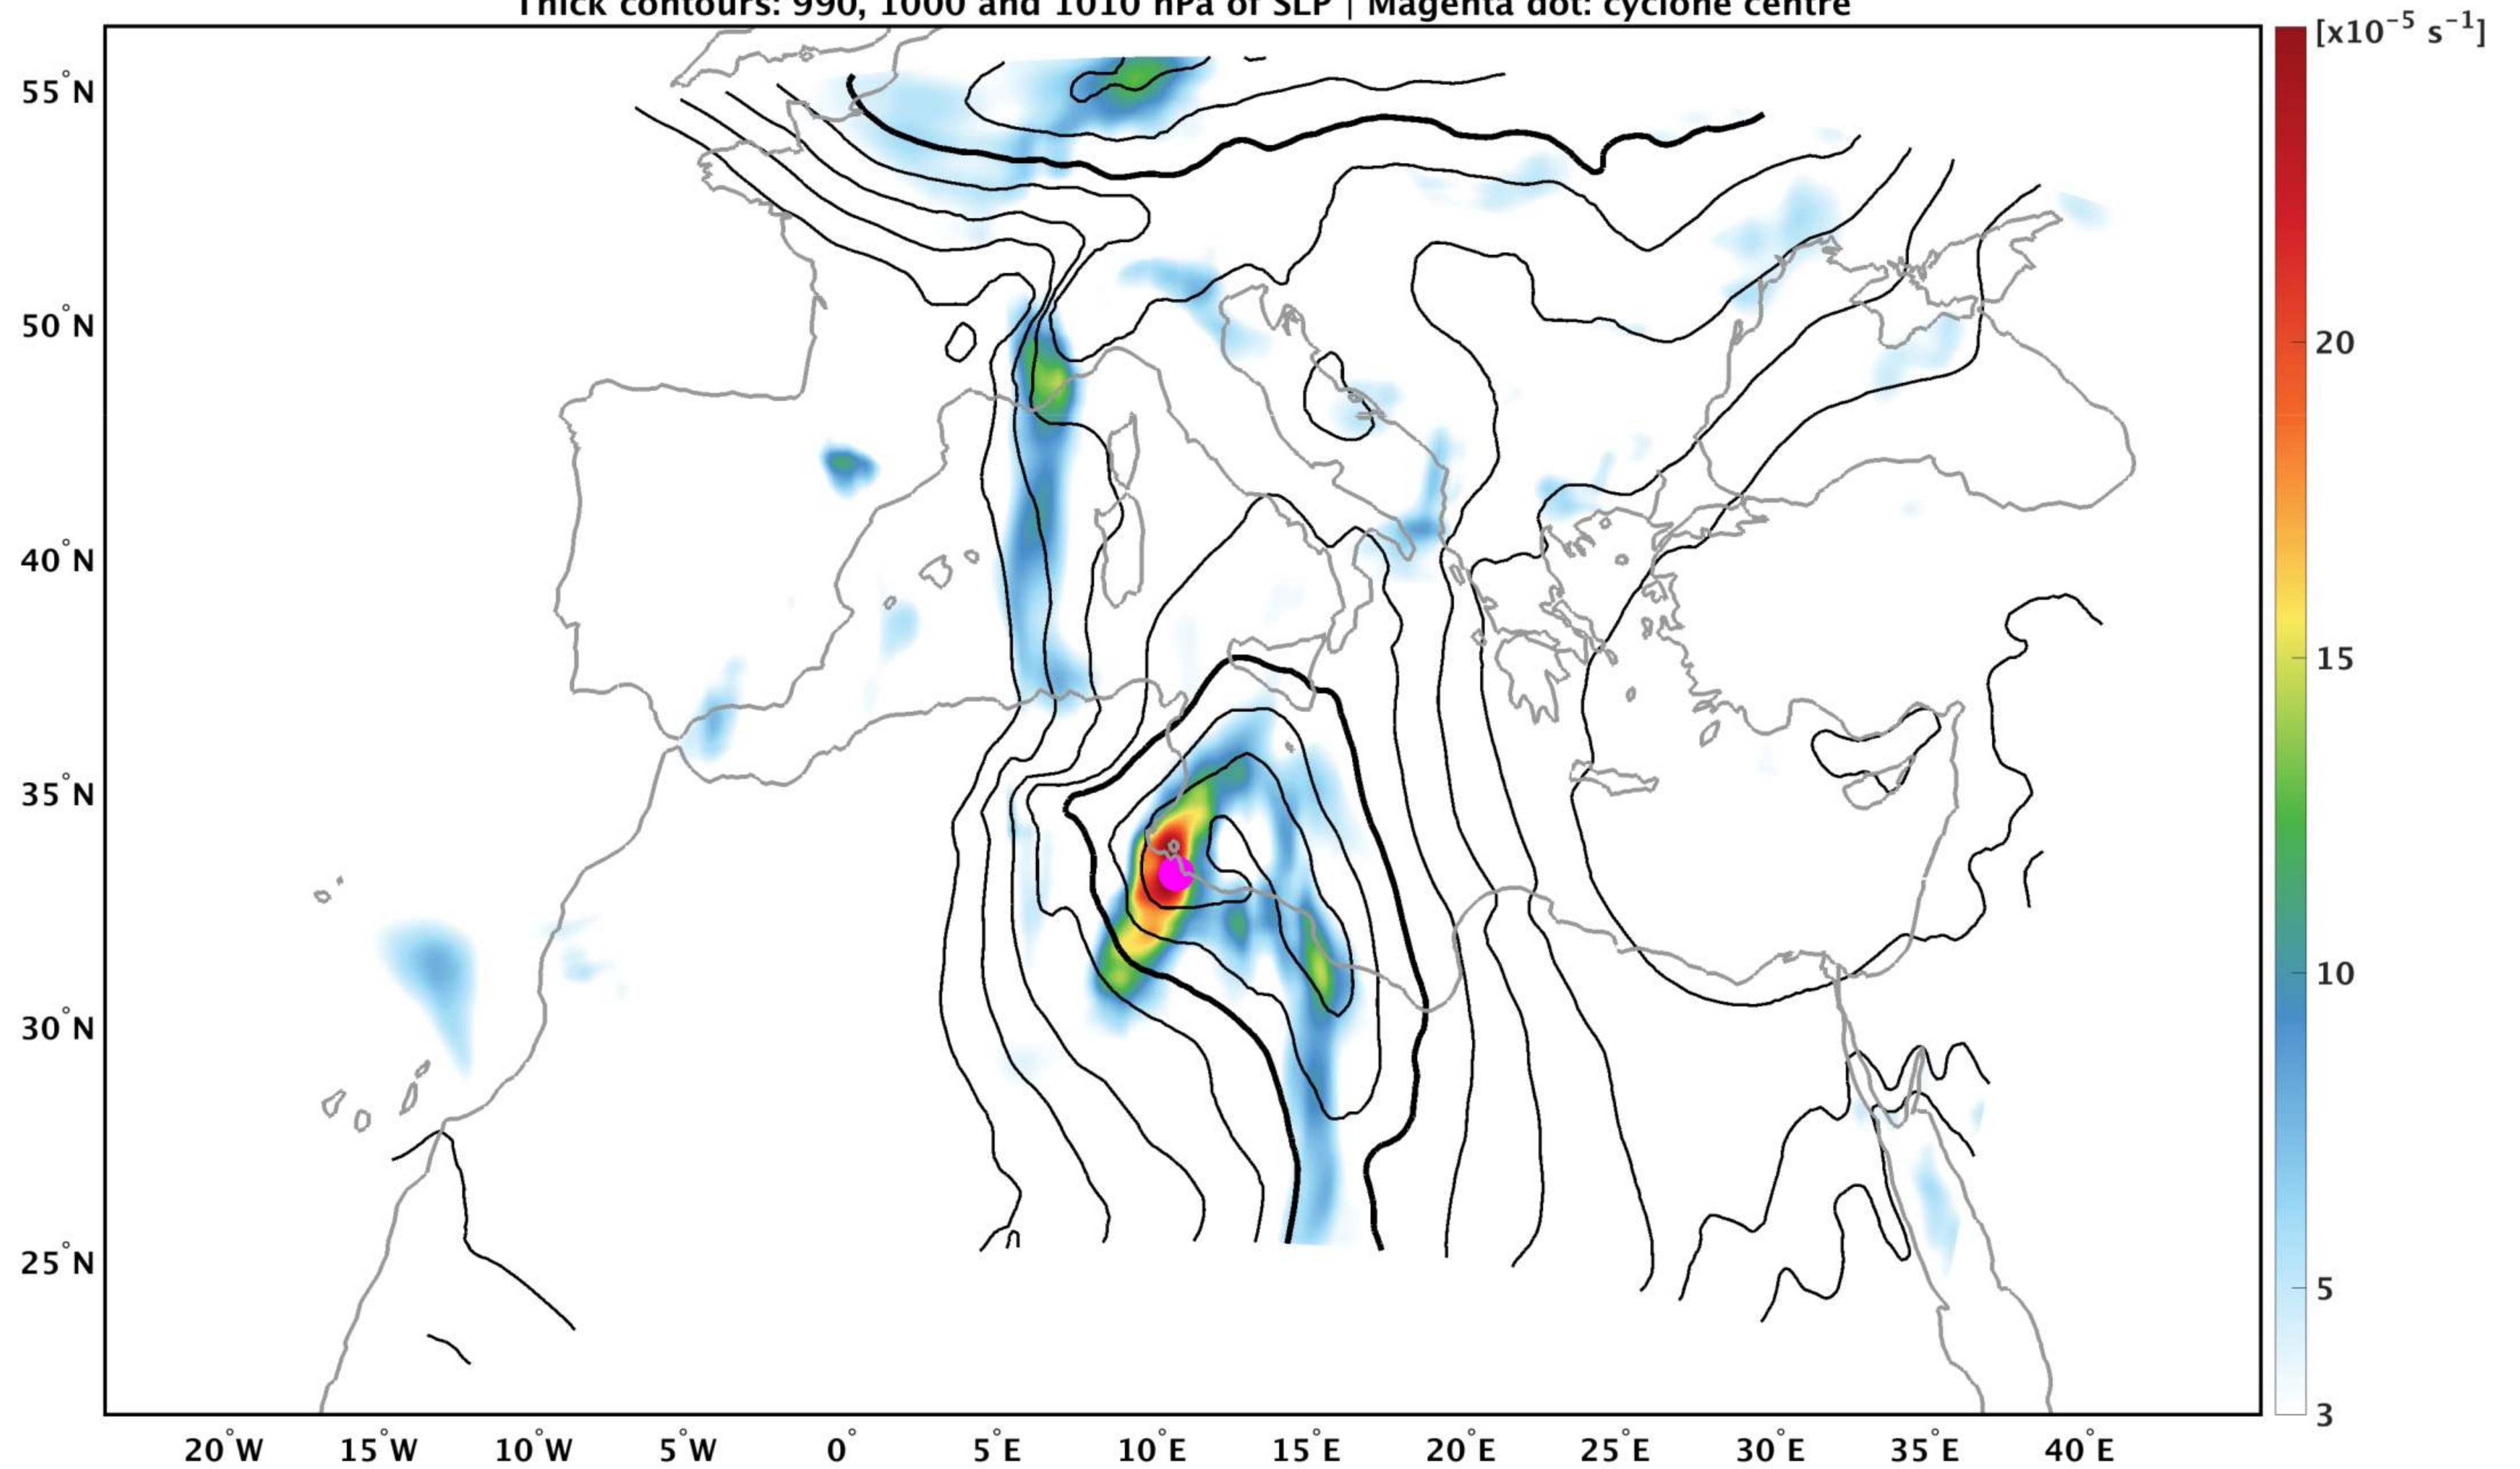



Case-90; Date: 20/5/2008

Colour: Relative vorticity ( $\times 10^{-5}$ ) | Contour: SLP (from 1018 hPa with an interval of 2 hPa)

Thick contours: 990, 1000 and 1010 hPa of SLP | Magenta dot: cyclone centre

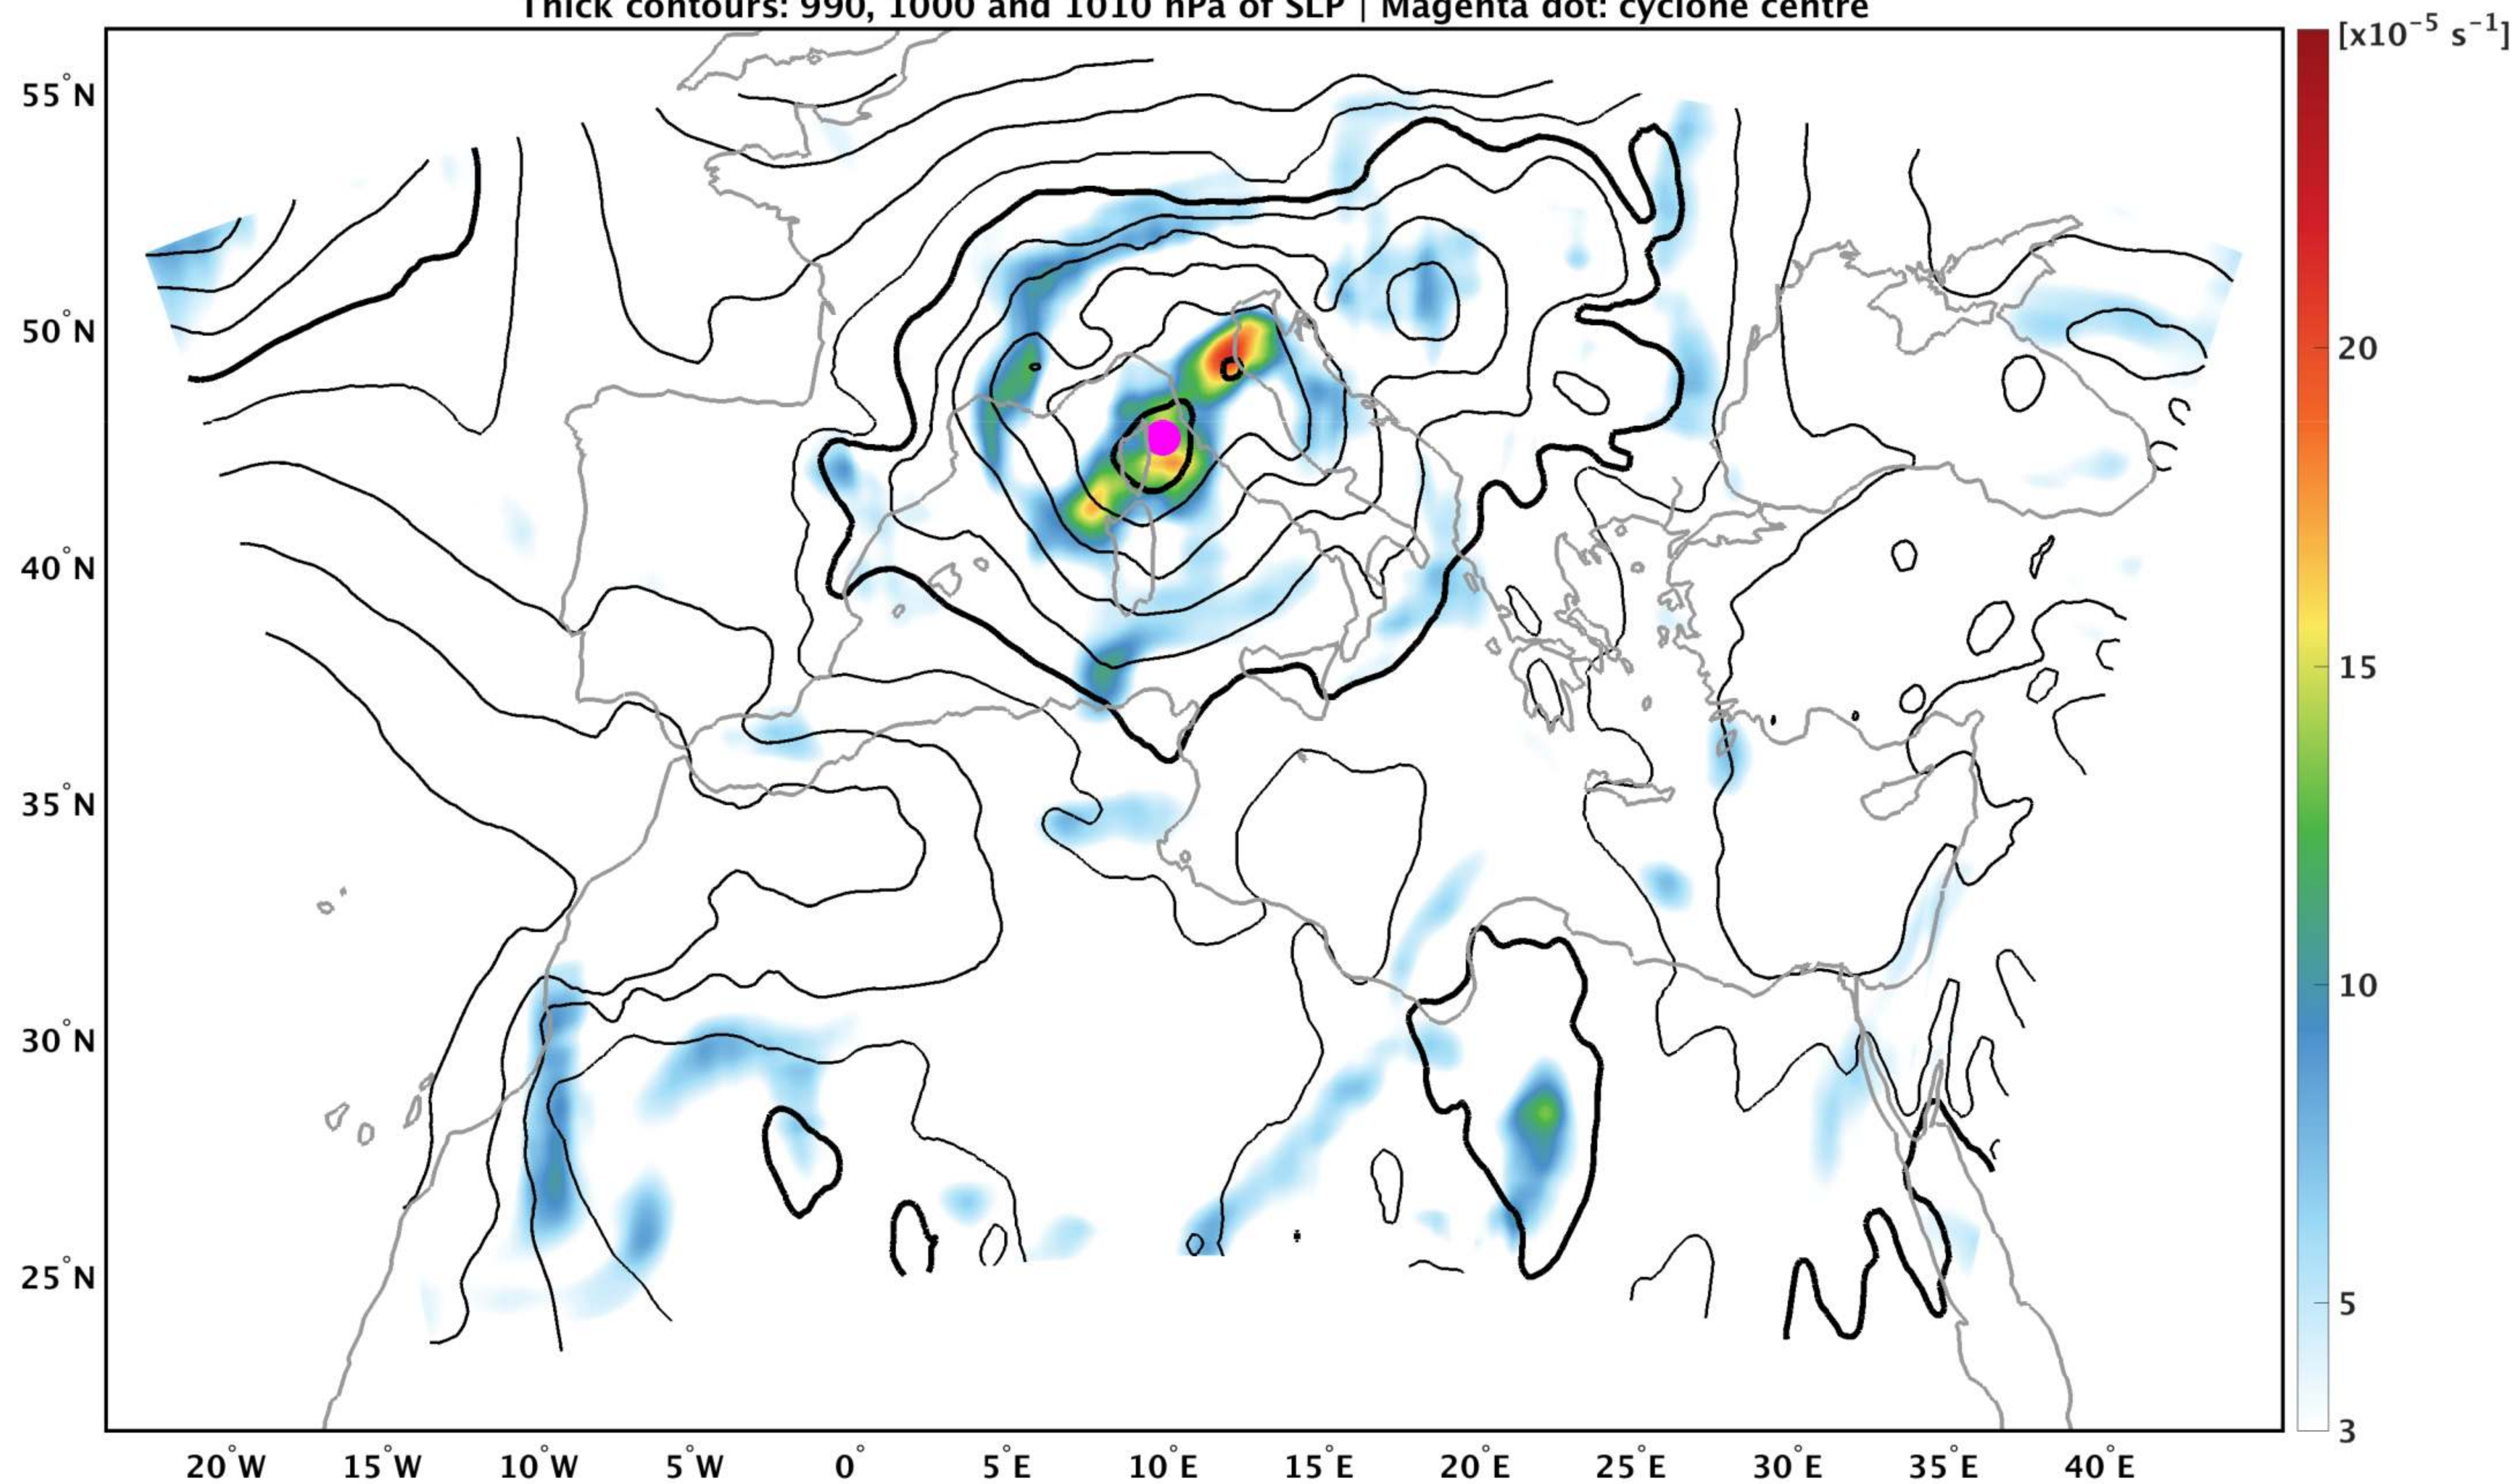



Case-91; Date: 23/1/2015

Colour: Relative vorticity ( $\times 10^{-5}$ ) | Contour: SLP (from 1018 hPa with an interval of 2 hPa)

Thick contours: 990, 1000 and 1010 hPa of SLP | Magenta dot: cyclone centre

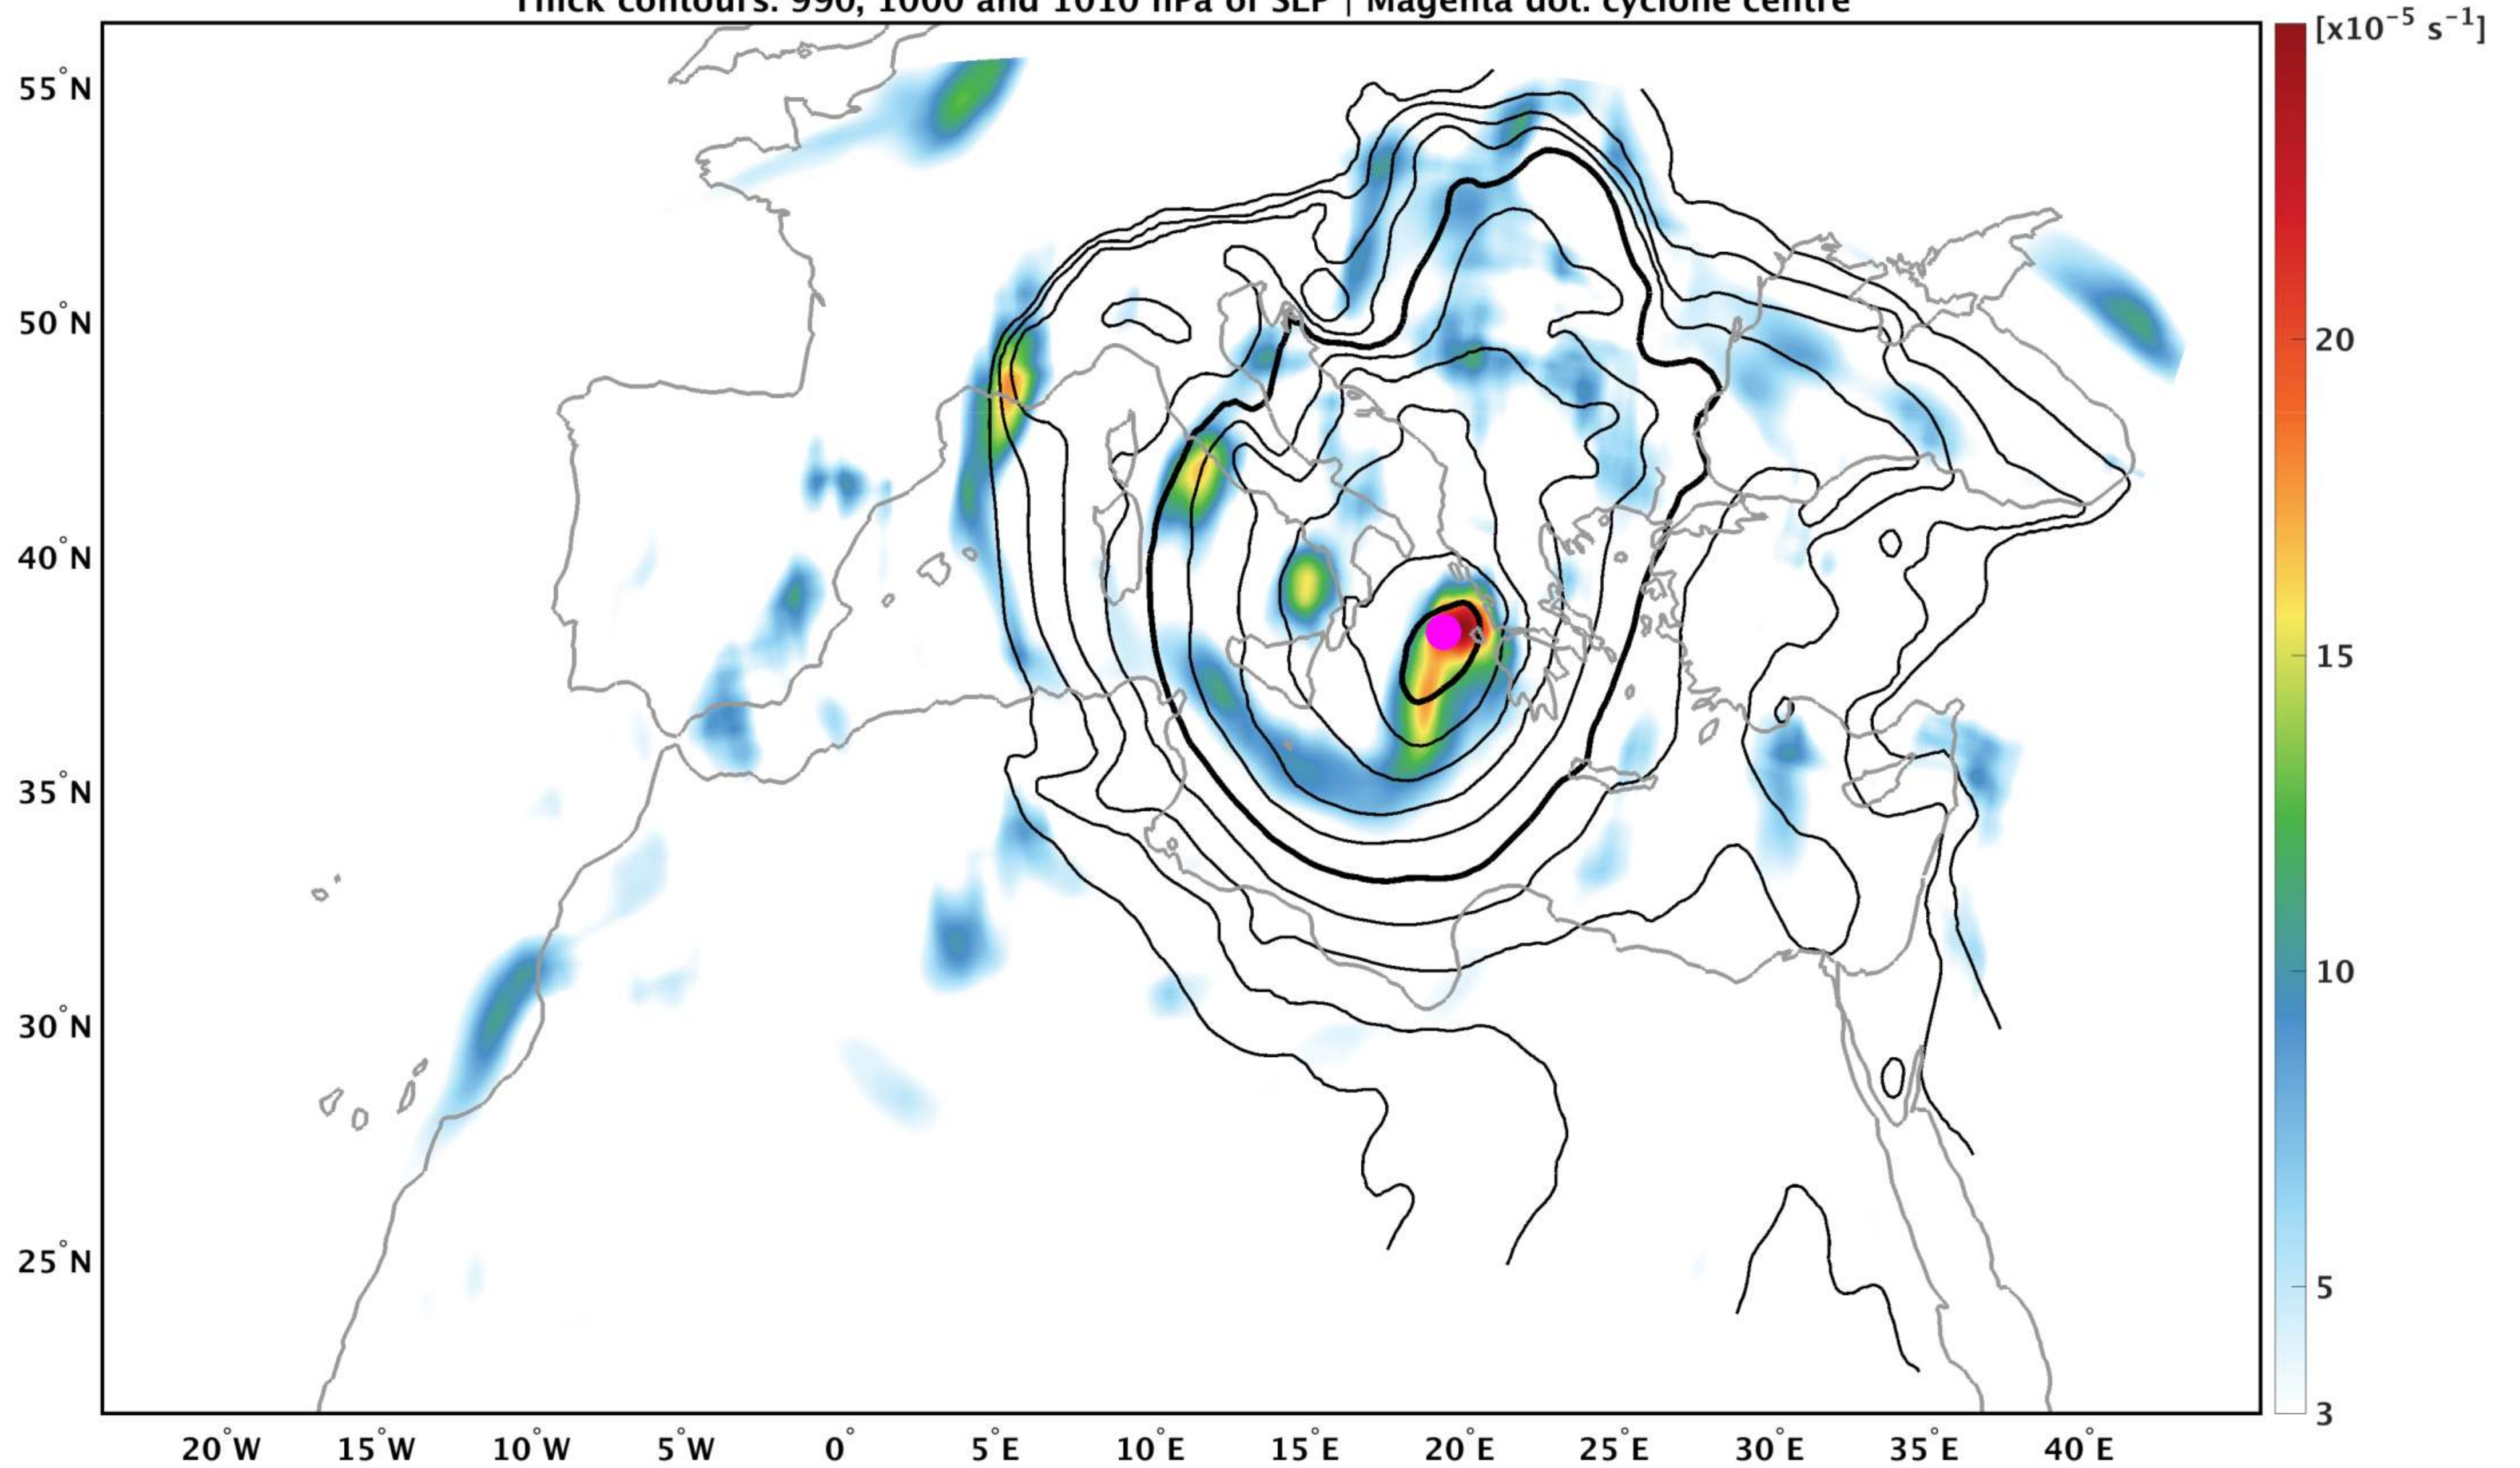



Case-92; Date: 8/12/2014

Colour: Relative vorticity ( $\times 10^{-5}$ ) | Contour: SLP (from 1018 hPa with an interval of 2 hPa)

Thick contours: 990, 1000 and 1010 hPa of SLP | Magenta dot: cyclone centre

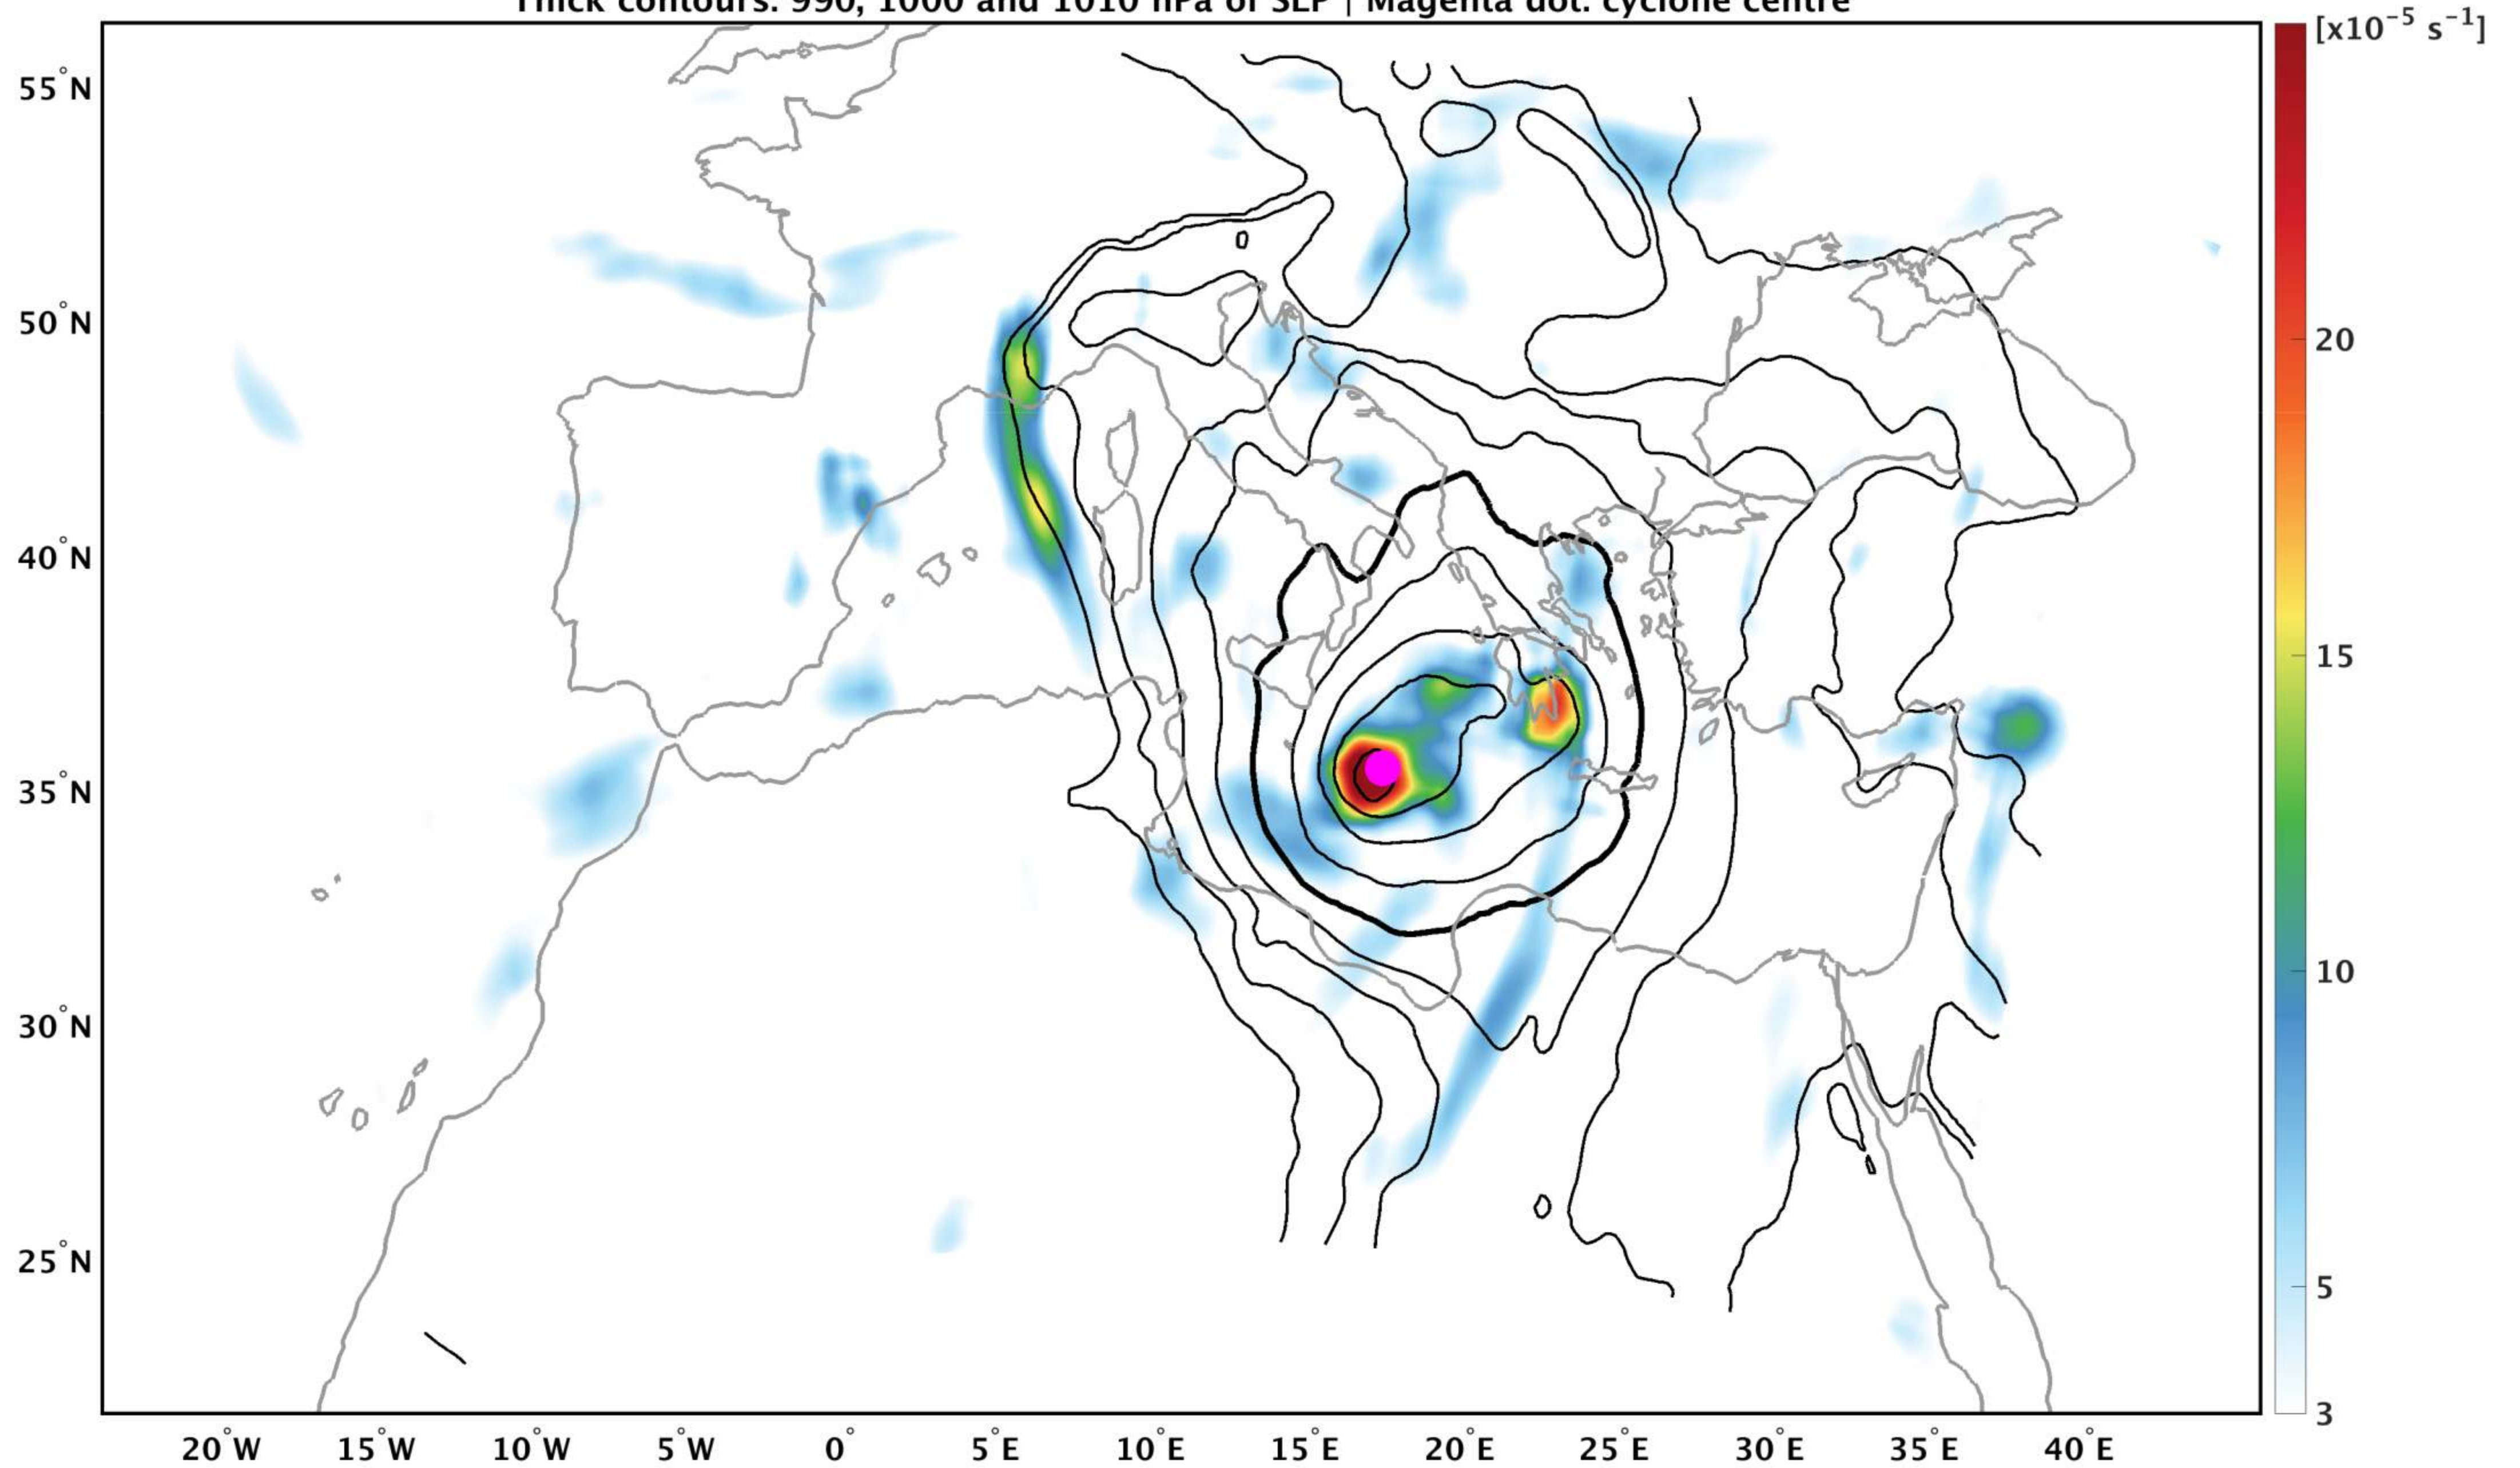



Case-93; Date: 2/12/2009

Colour: Relative vorticity ( $\times 10^{-5}$ ) | Contour: SLP (from 1018 hPa with an interval of 2 hPa)

Thick contours: 990, 1000 and 1010 hPa of SLP | Magenta dot: cyclone centre

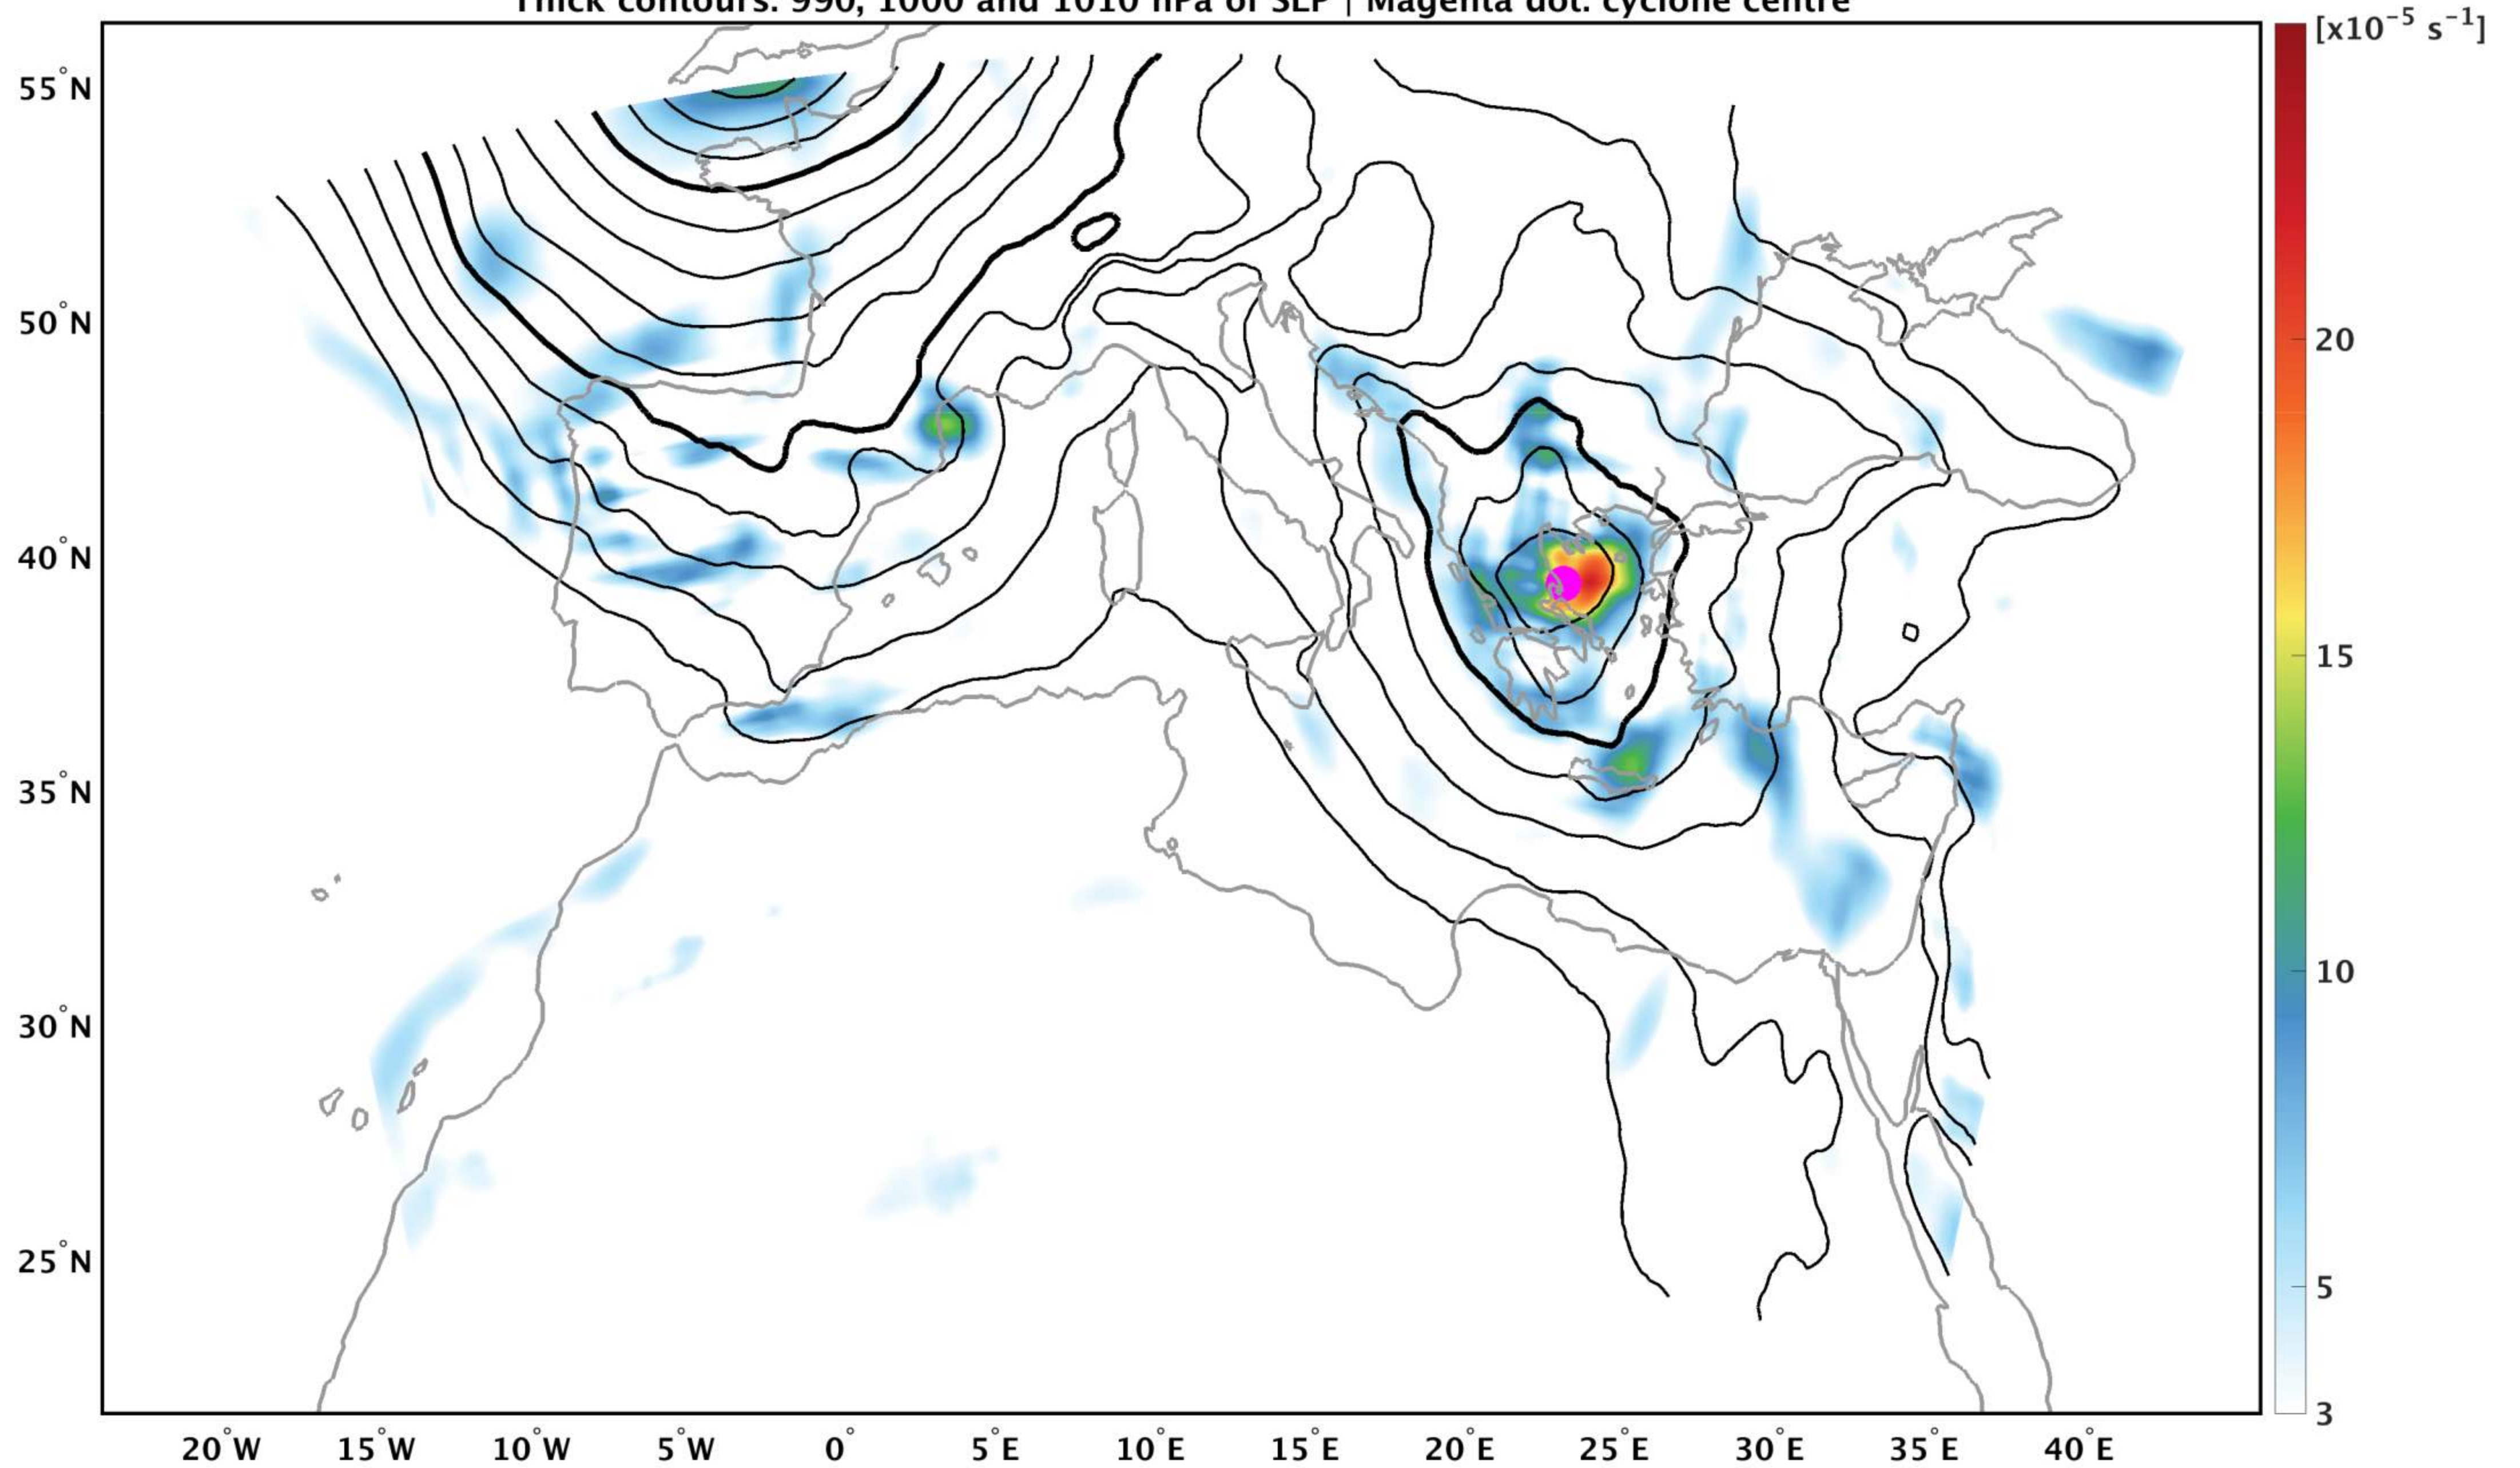



Case-94; Date: 13/9/2008

Colour: Relative vorticity ( $\times 10^{-5}$ ) | Contour: SLP (from 1018 hPa with an interval of 2 hPa)

Thick contours: 990, 1000 and 1010 hPa of SLP | Magenta dot: cyclone centre

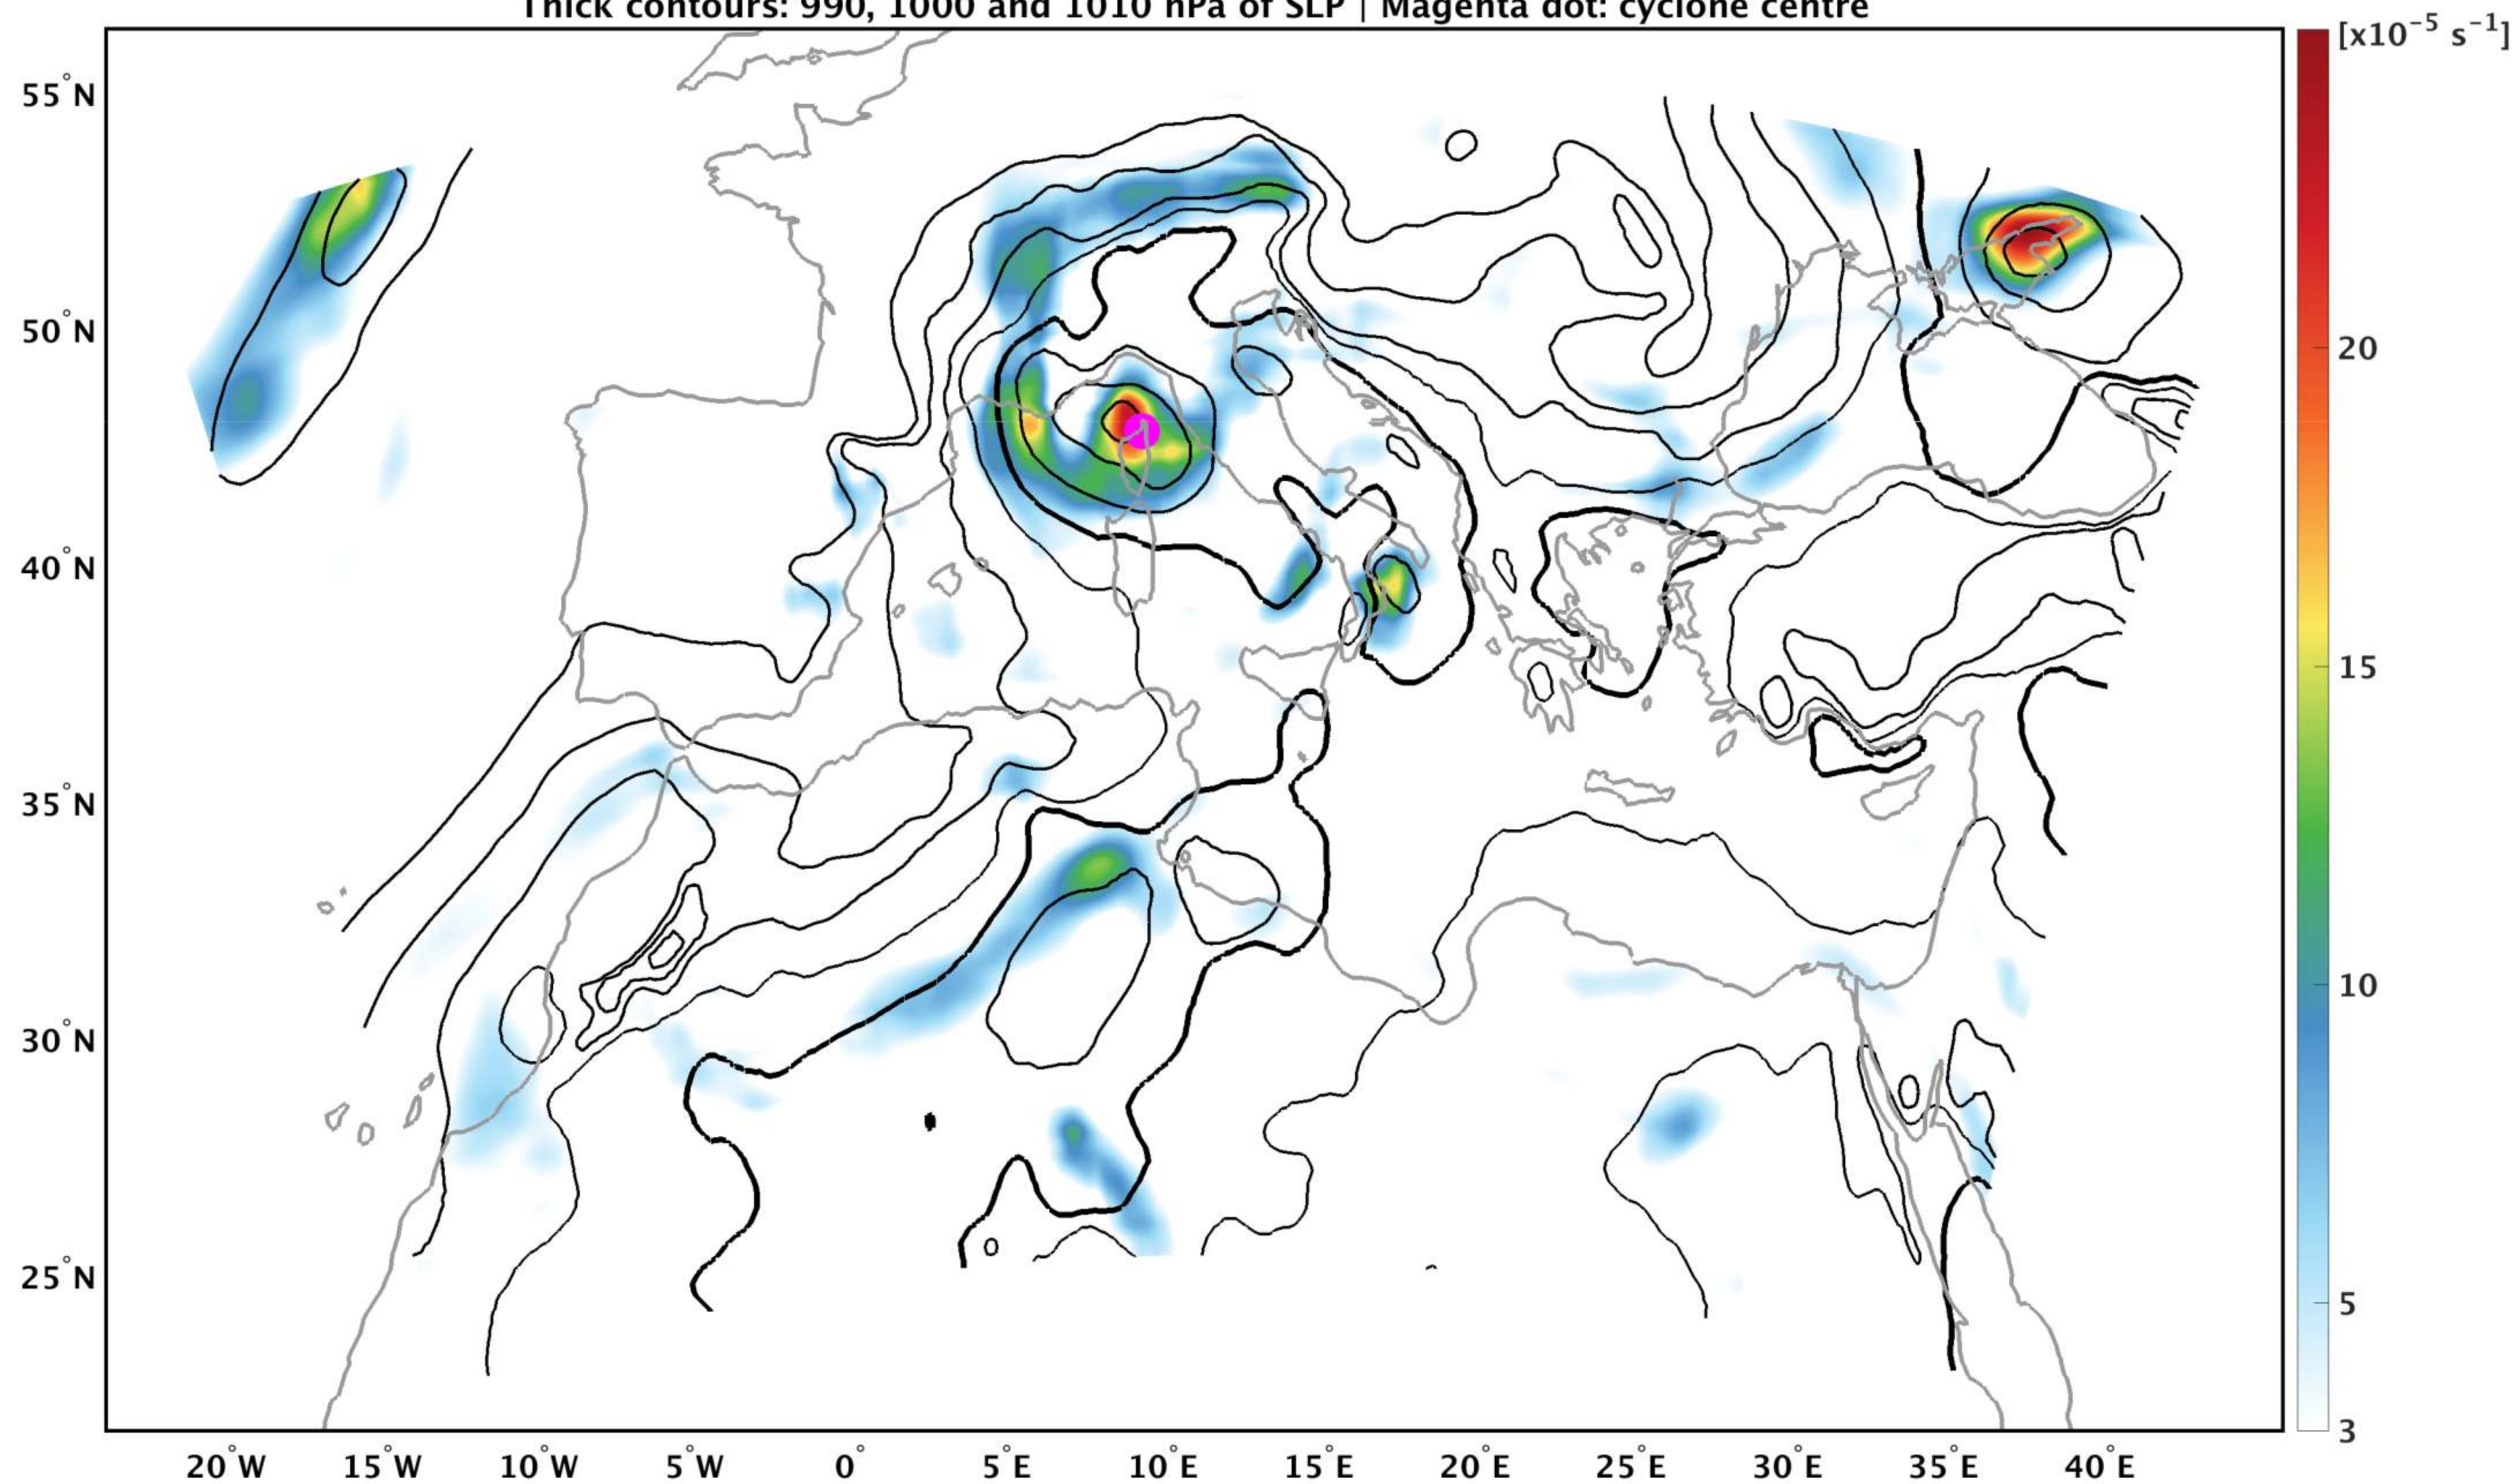



Case-95; Date: 13/3/2012

Colour: Relative vorticity ( $\times 10^{-5}$ ) | Contour: SLP (from 1018 hPa with an interval of 2 hPa)

Thick contours: 990, 1000 and 1010 hPa of SLP | Magenta dot: cyclone centre

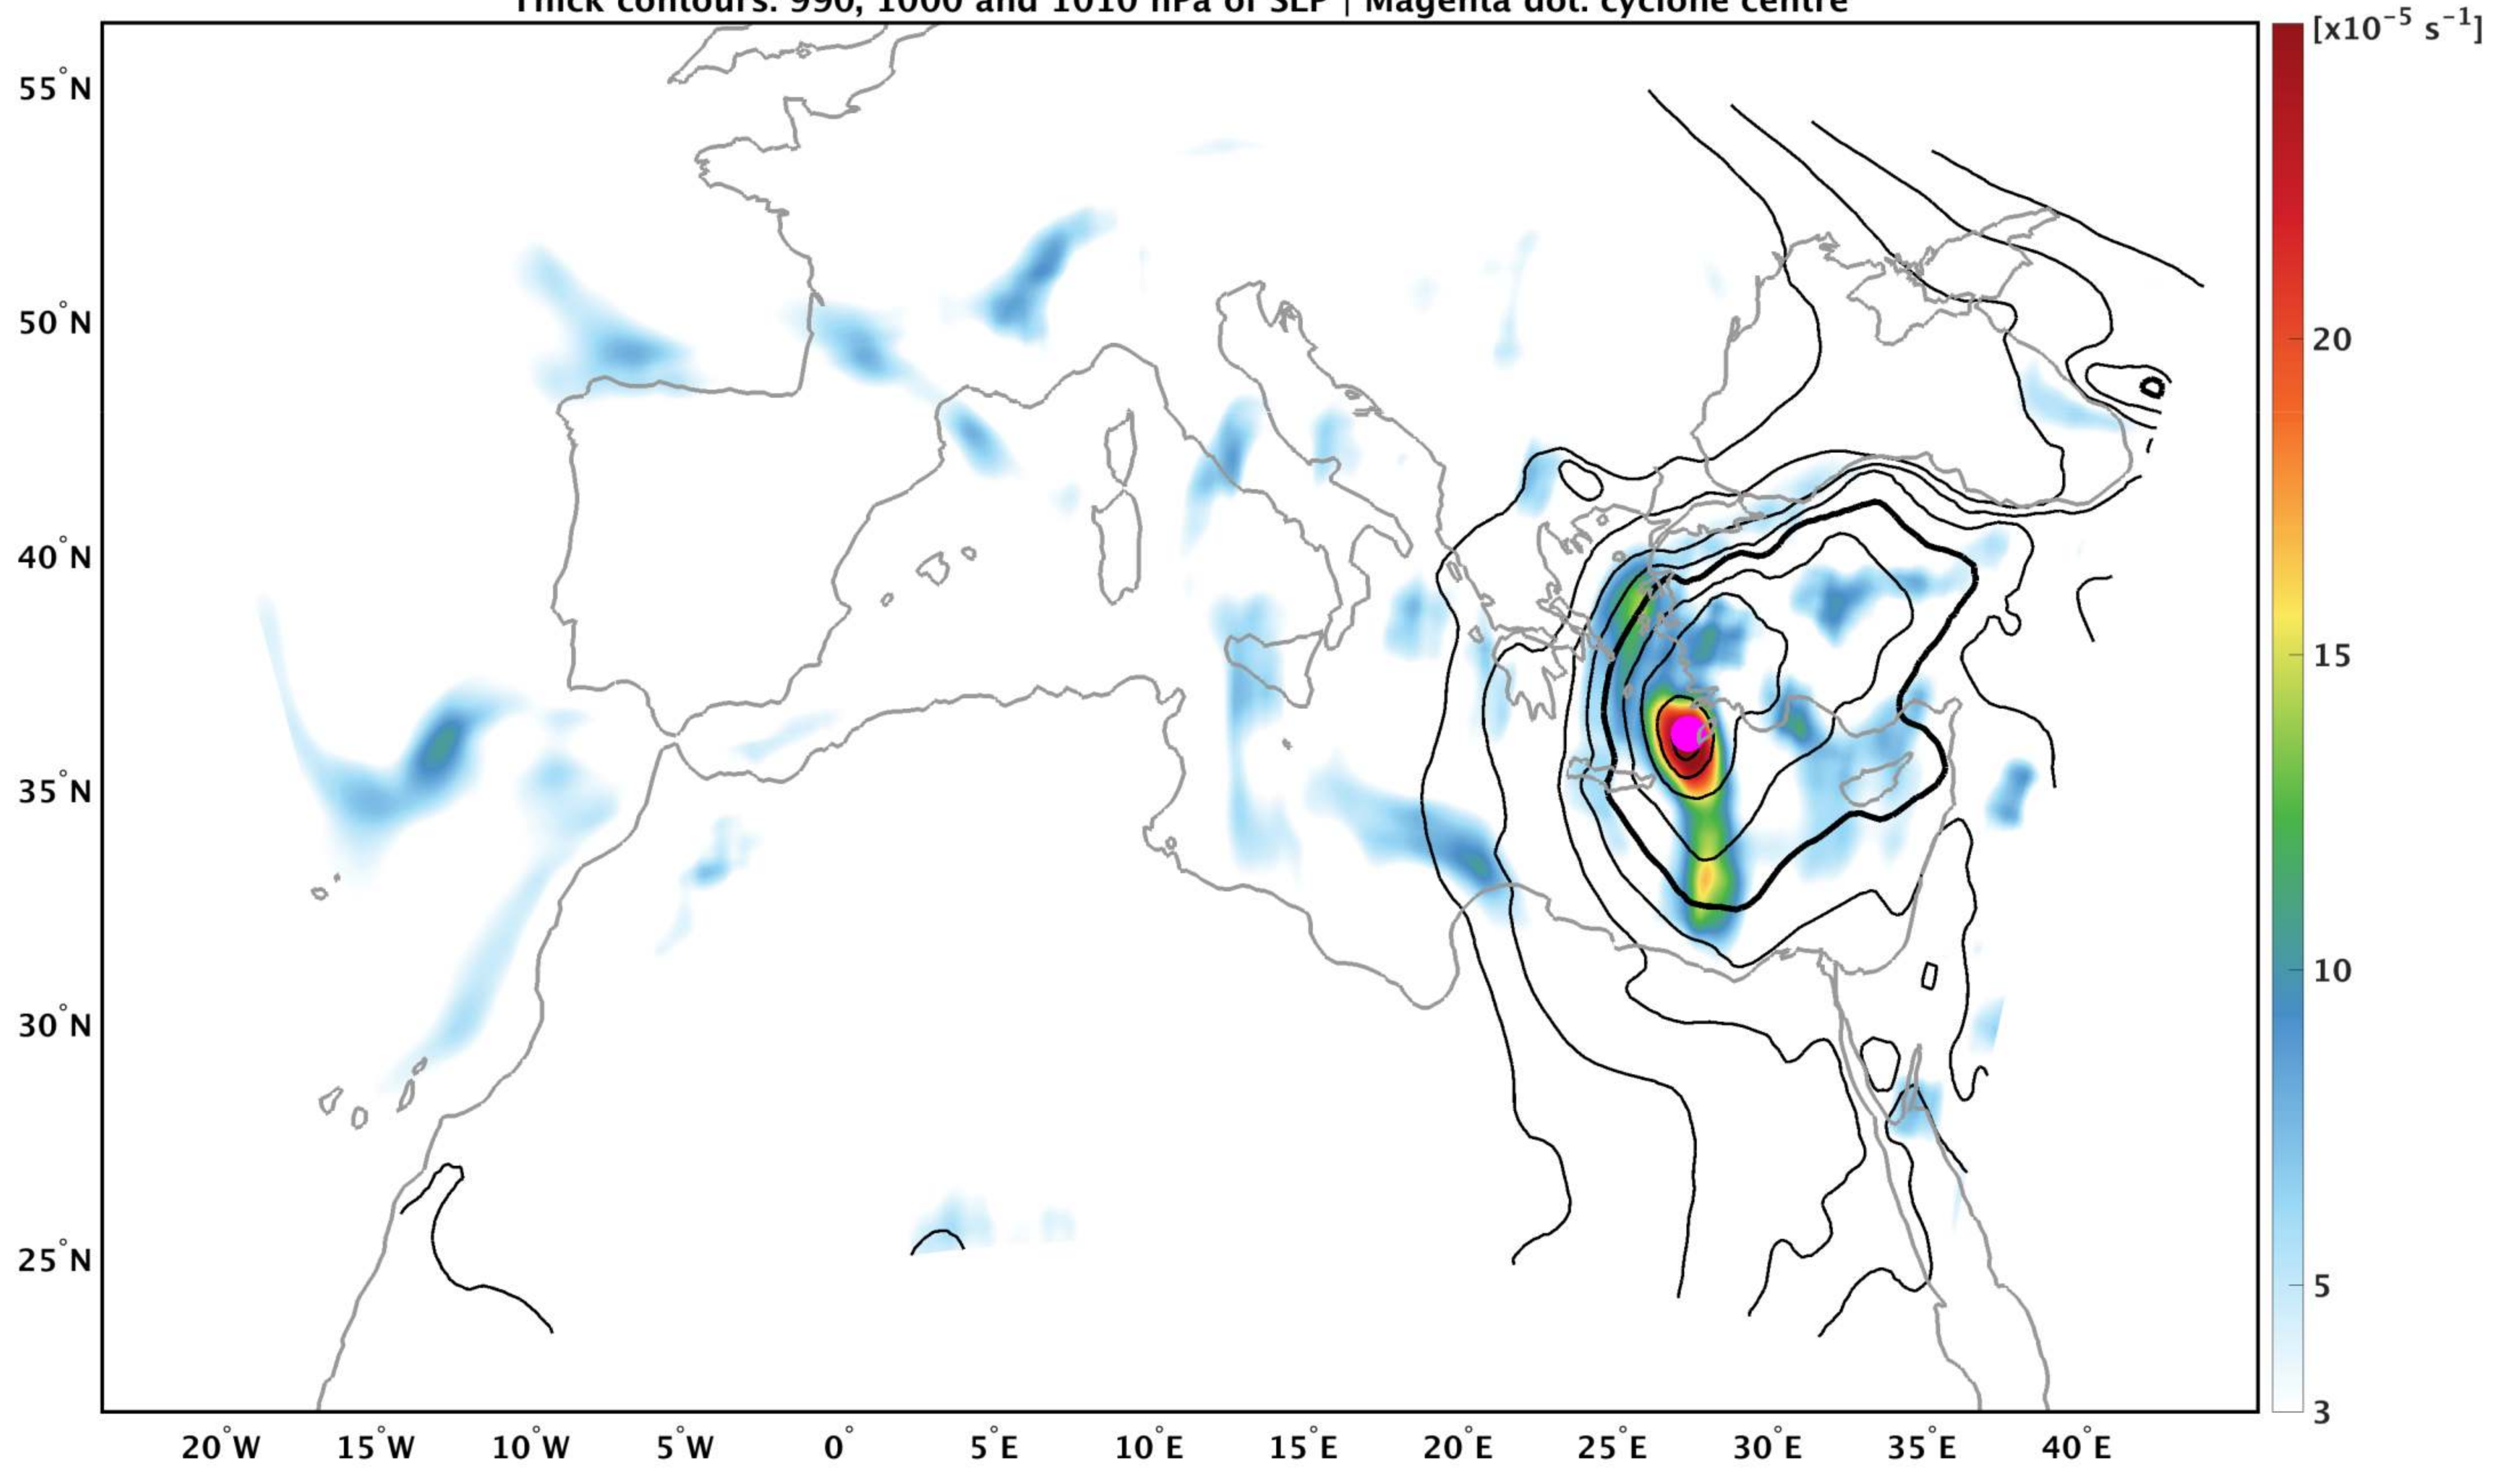



Case-96; Date: 21/11/2011

Colour: Relative vorticity ( $\times 10^{-5}$ ) | Contour: SLP (from 1018 hPa with an interval of 2 hPa)

Thick contours: 990, 1000 and 1010 hPa of SLP | Magenta dot: cyclone centre

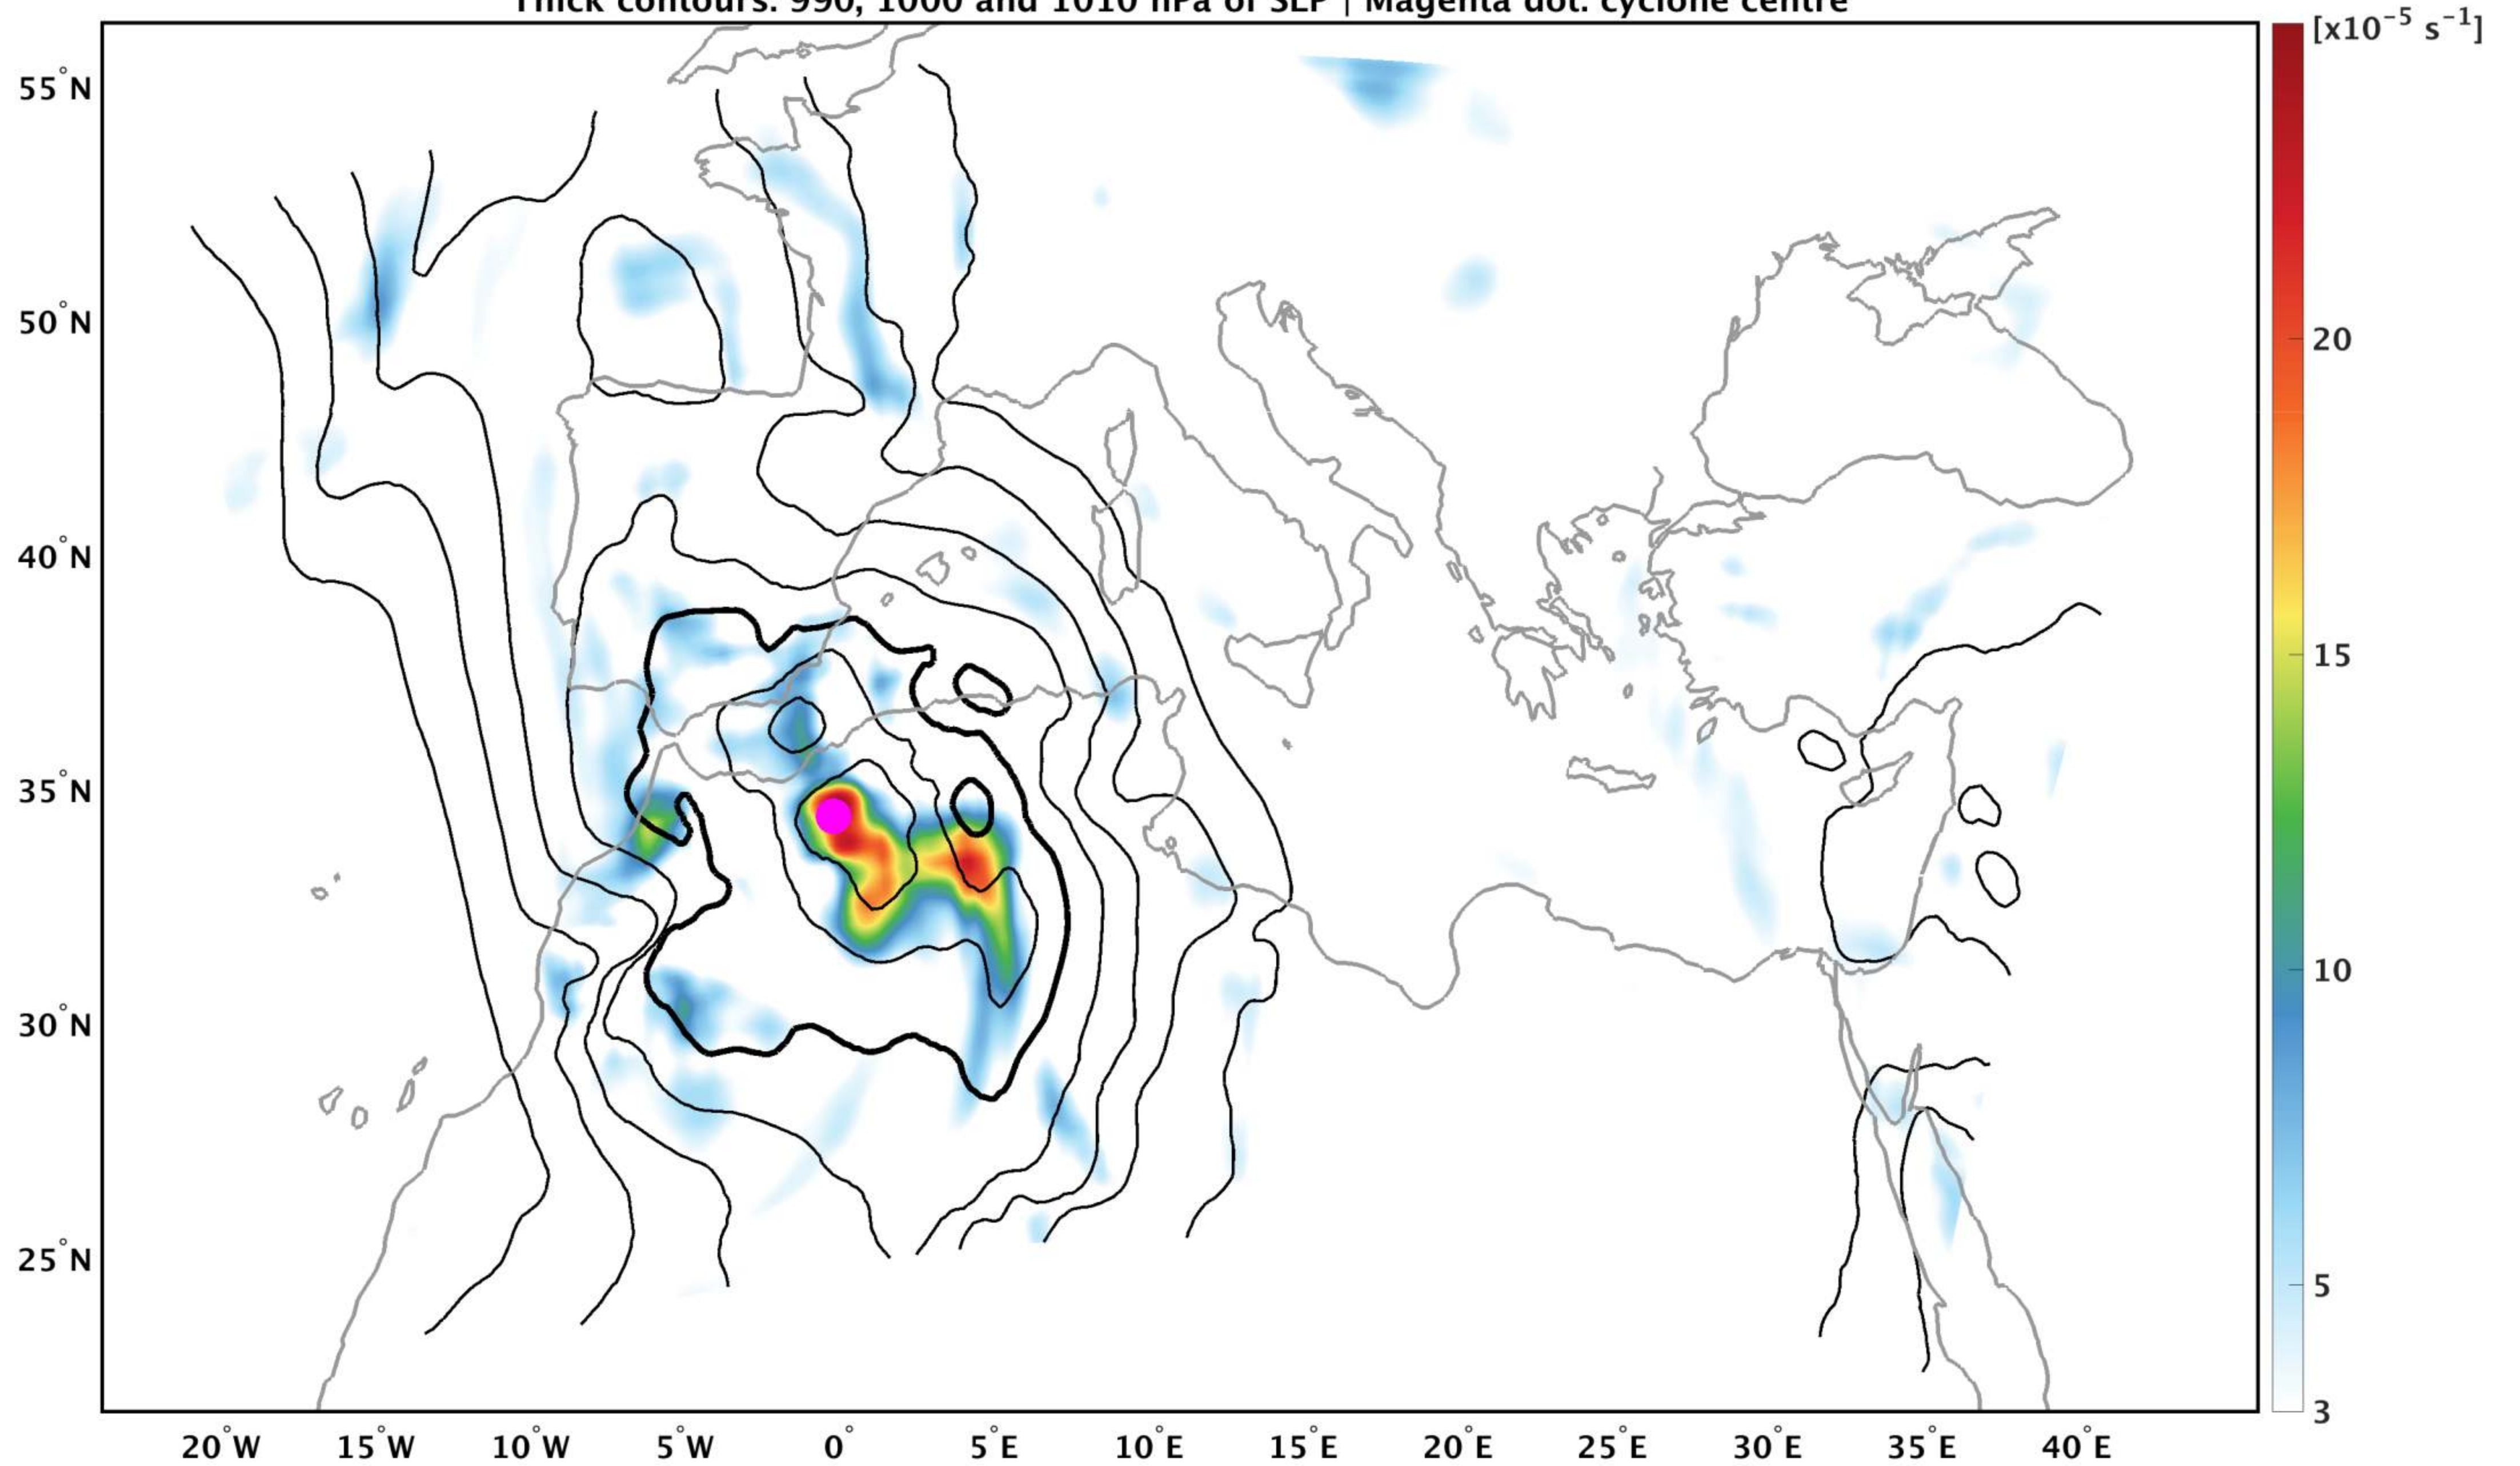



Case-97; Date: 6/4/2009

Colour: Relative vorticity ( $\times 10^{-5}$ ) | Contour: SLP (from 1018 hPa with an interval of 2 hPa)

Thick contours: 990, 1000 and 1010 hPa of SLP | Magenta dot: cyclone centre

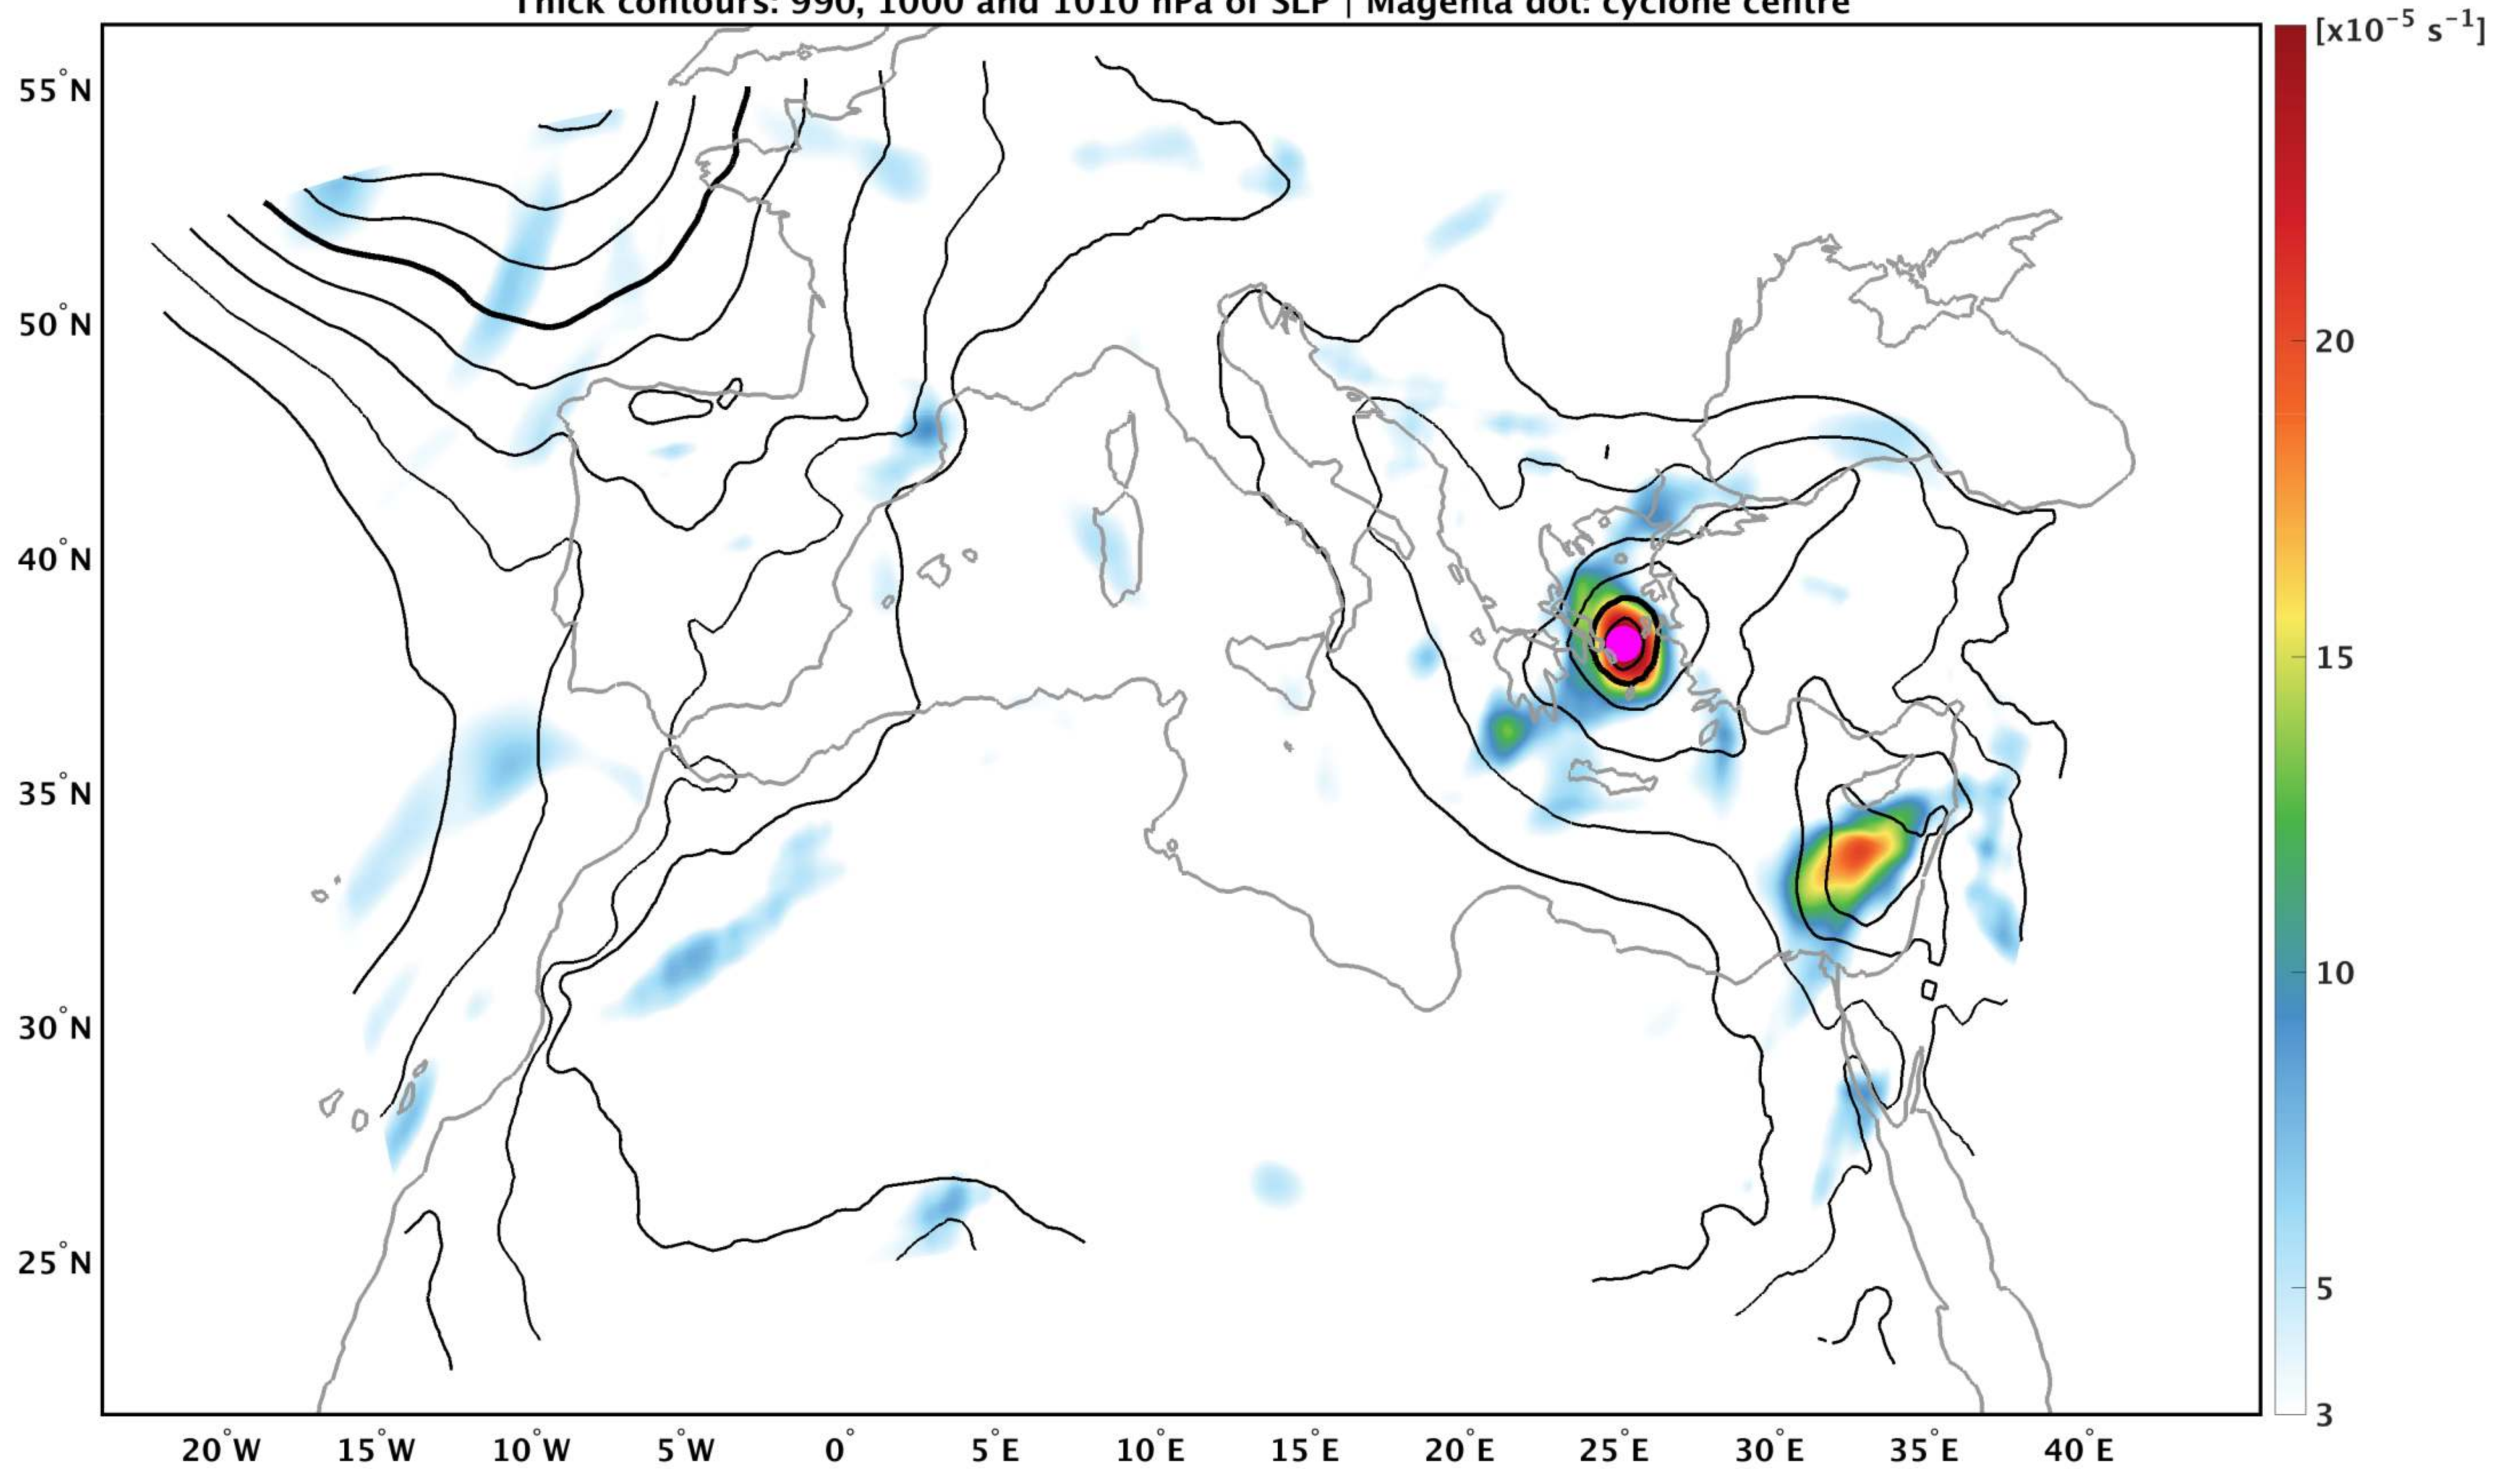



Case-98; Date: 8/12/2012

Colour: Relative vorticity ( $\times 10^{-5}$ ) | Contour: SLP (from 1018 hPa with an interval of 2 hPa)

Thick contours: 990, 1000 and 1010 hPa of SLP | Magenta dot: cyclone centre

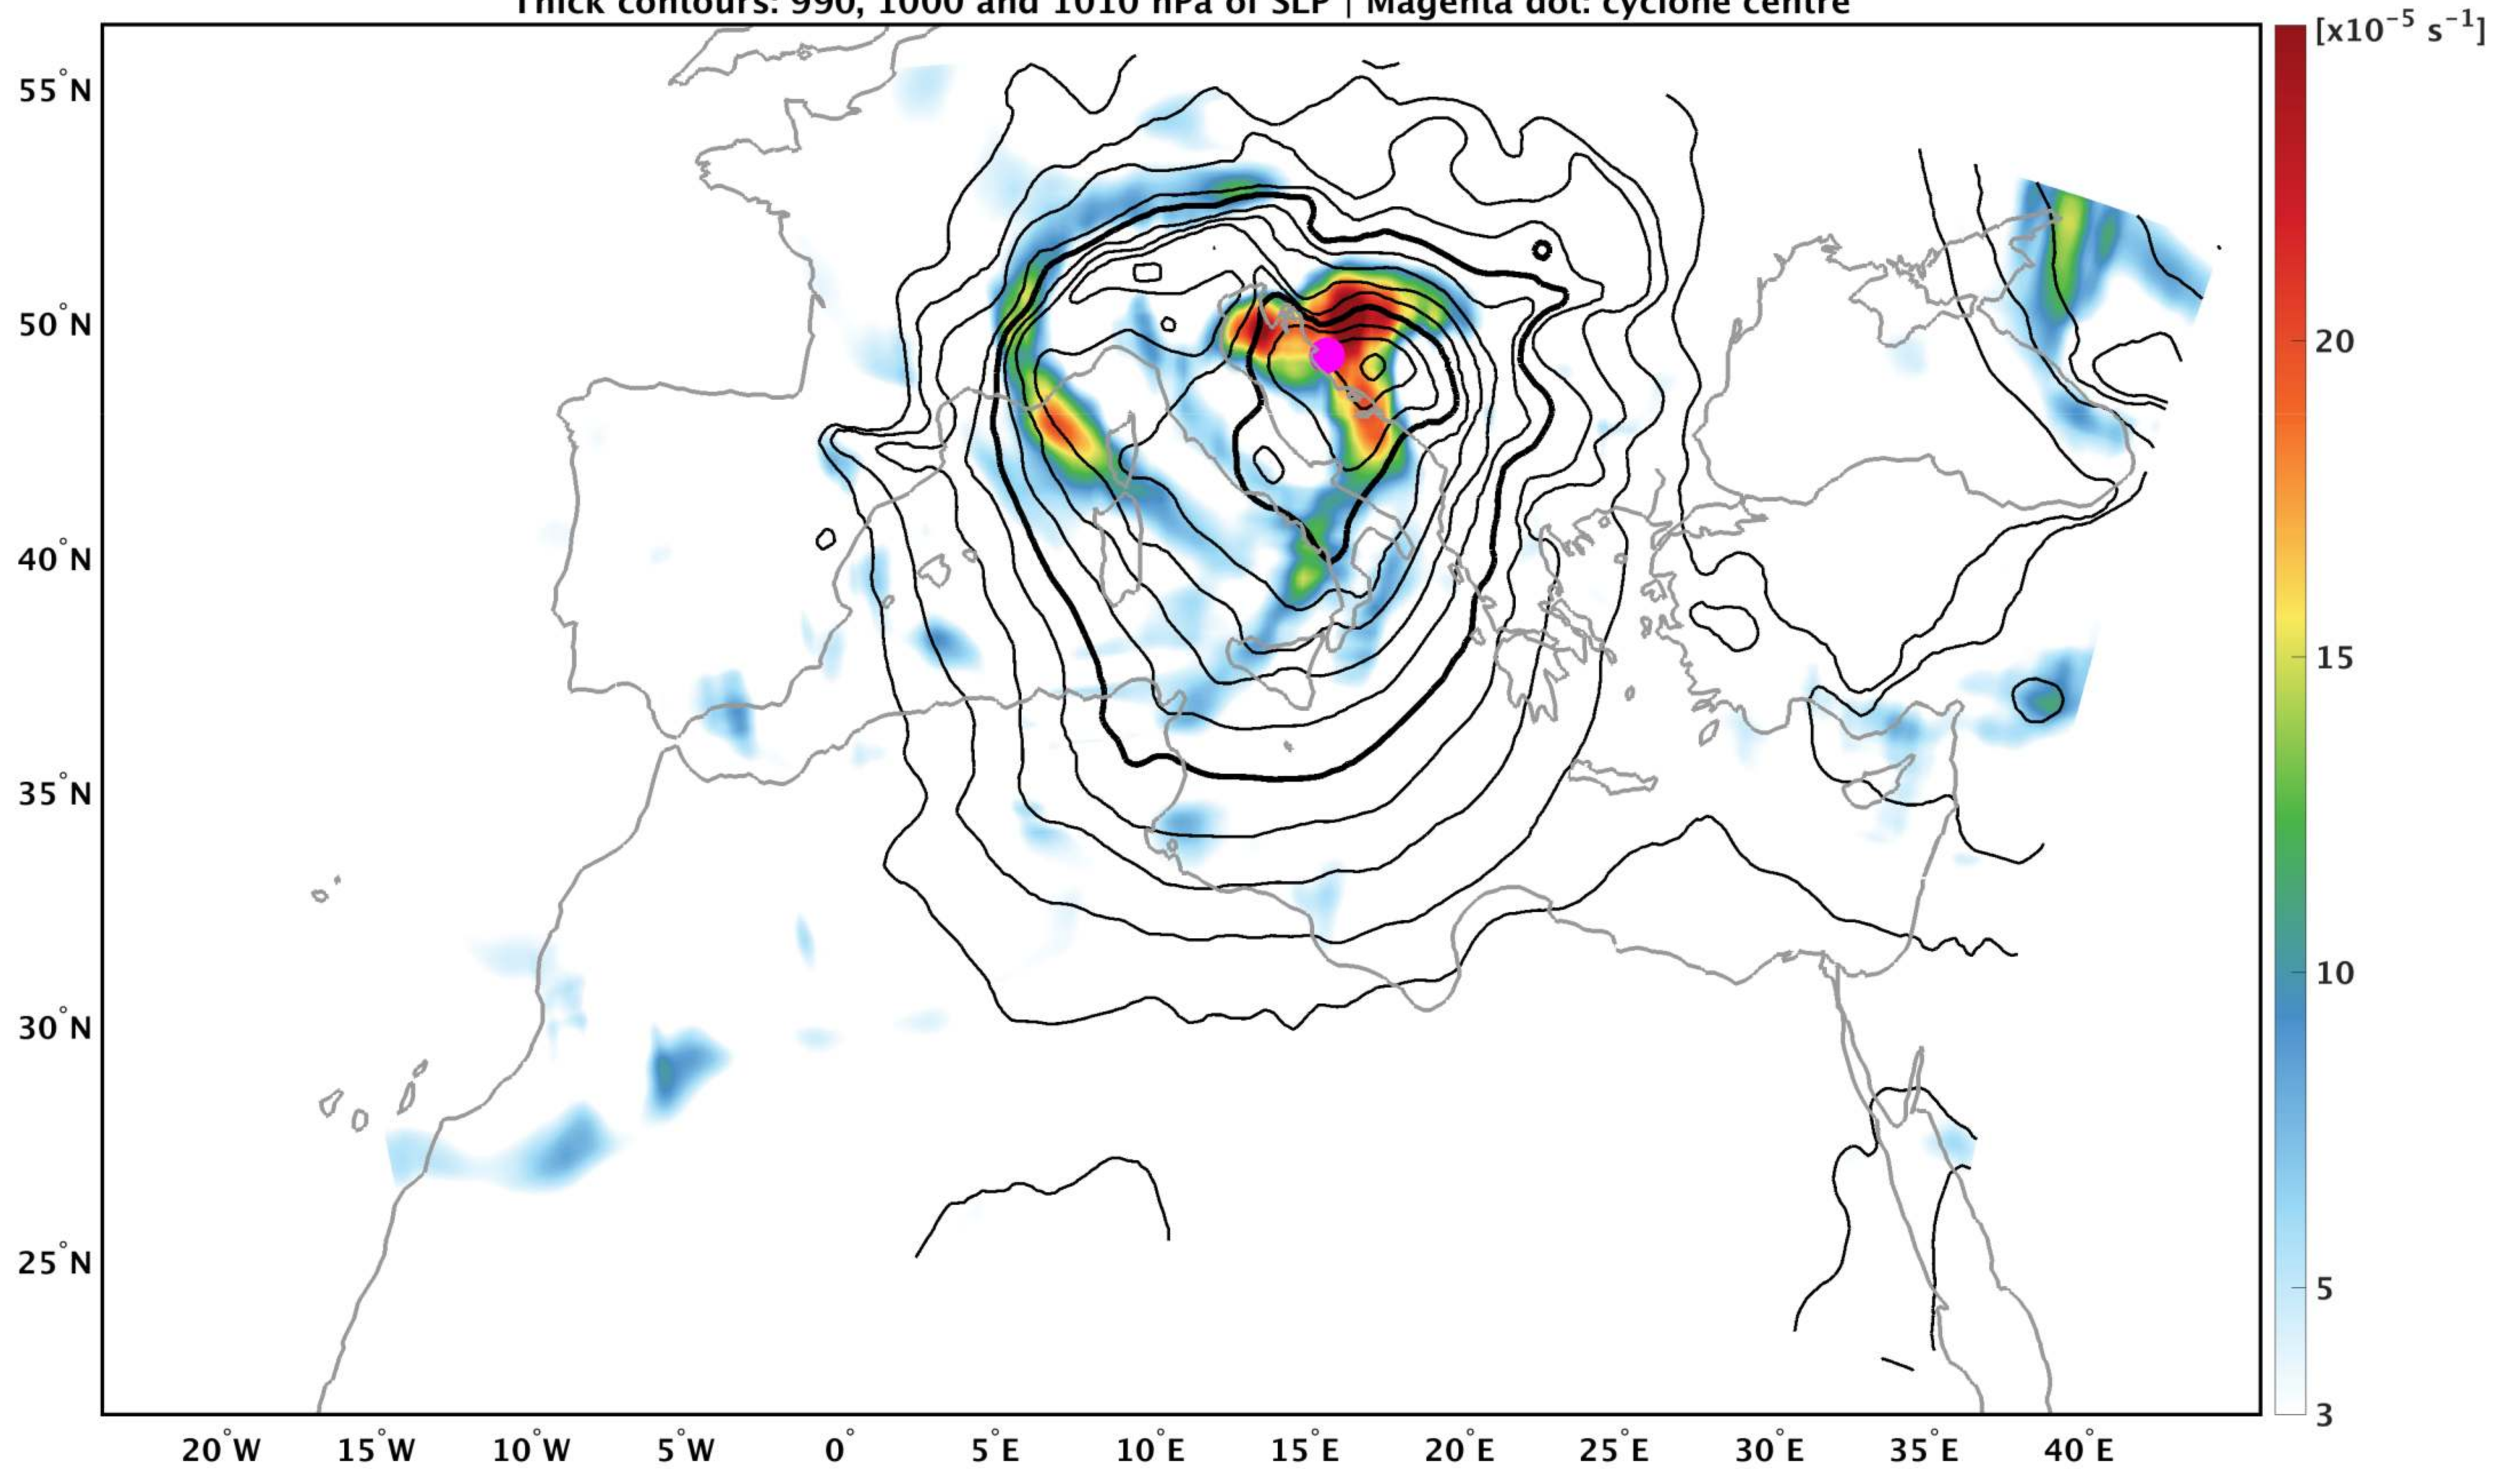



Case-99; Date: 17/1/2016

Colour: Relative vorticity ( $\times 10^{-5}$ ) | Contour: SLP (from 1018 hPa with an interval of 2 hPa)

Thick contours: 990, 1000 and 1010 hPa of SLP | Magenta dot: cyclone centre

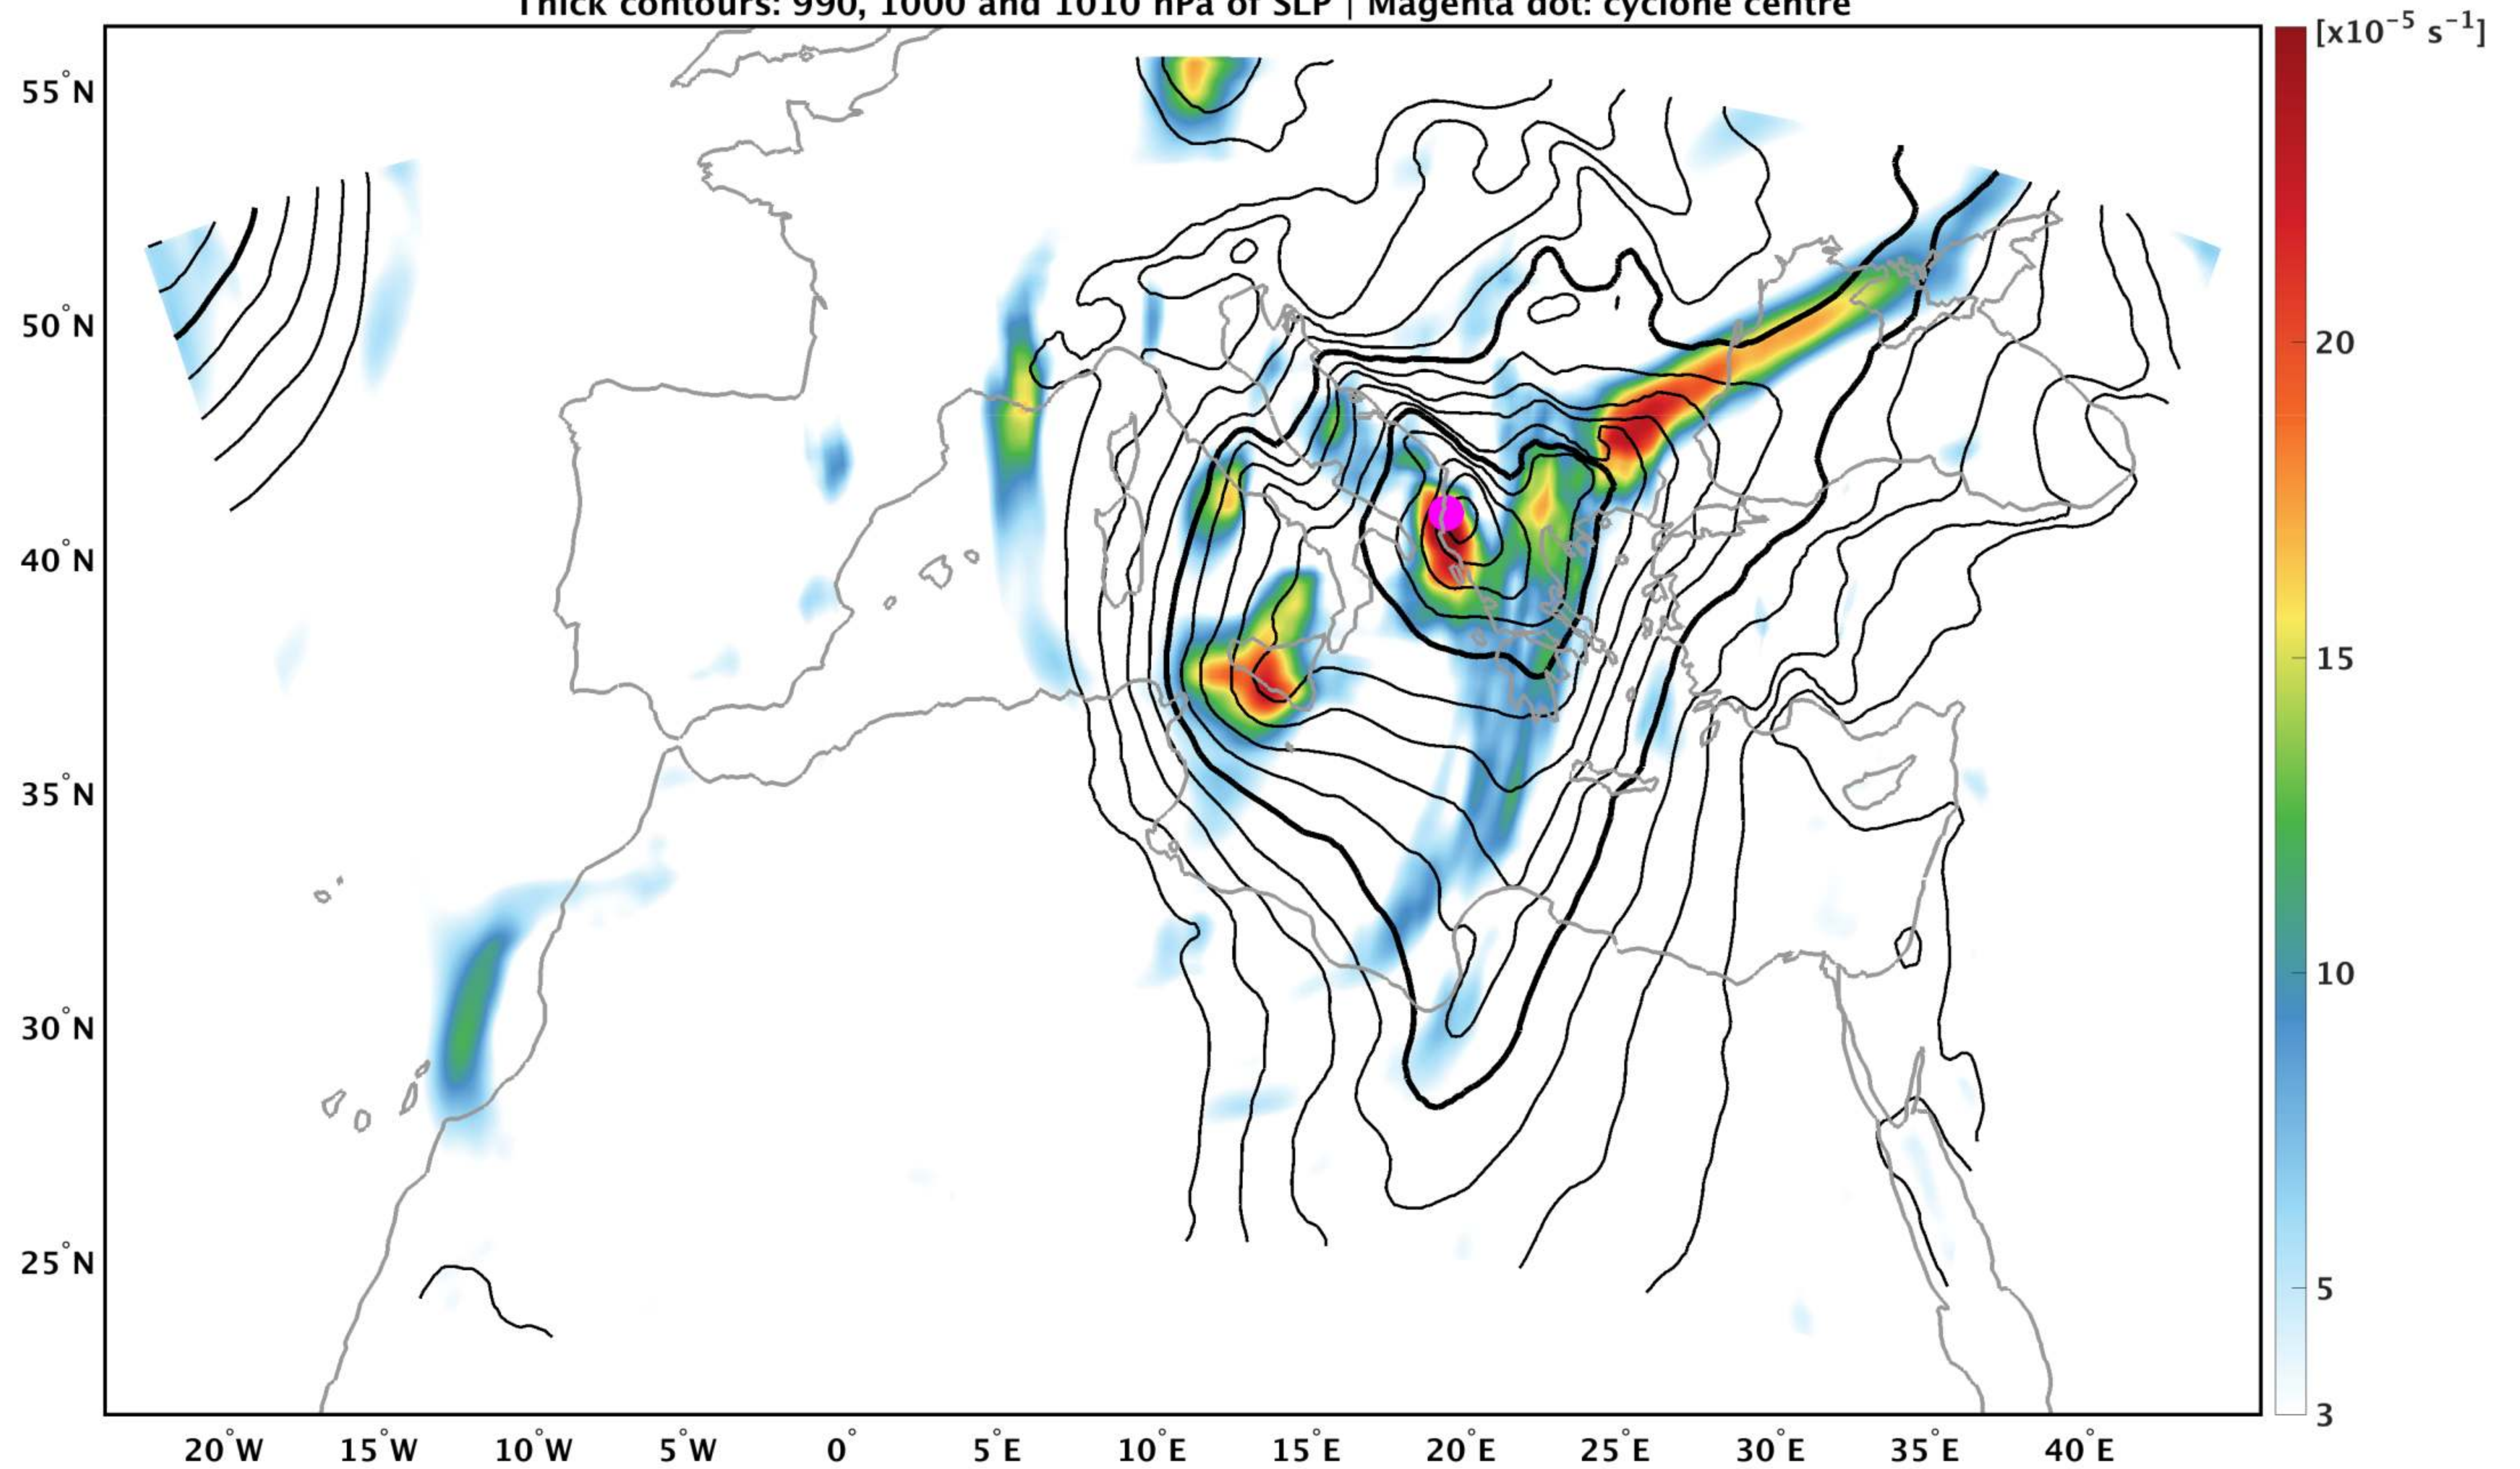



Case-100; Date: 25/3/2013

Colour: Relative vorticity ( $\times 10^{-5}$ ) | Contour: SLP (from 1018 hPa with an interval of 2 hPa)

Thick contours: 990, 1000 and 1010 hPa of SLP | Magenta dot: cyclone centre

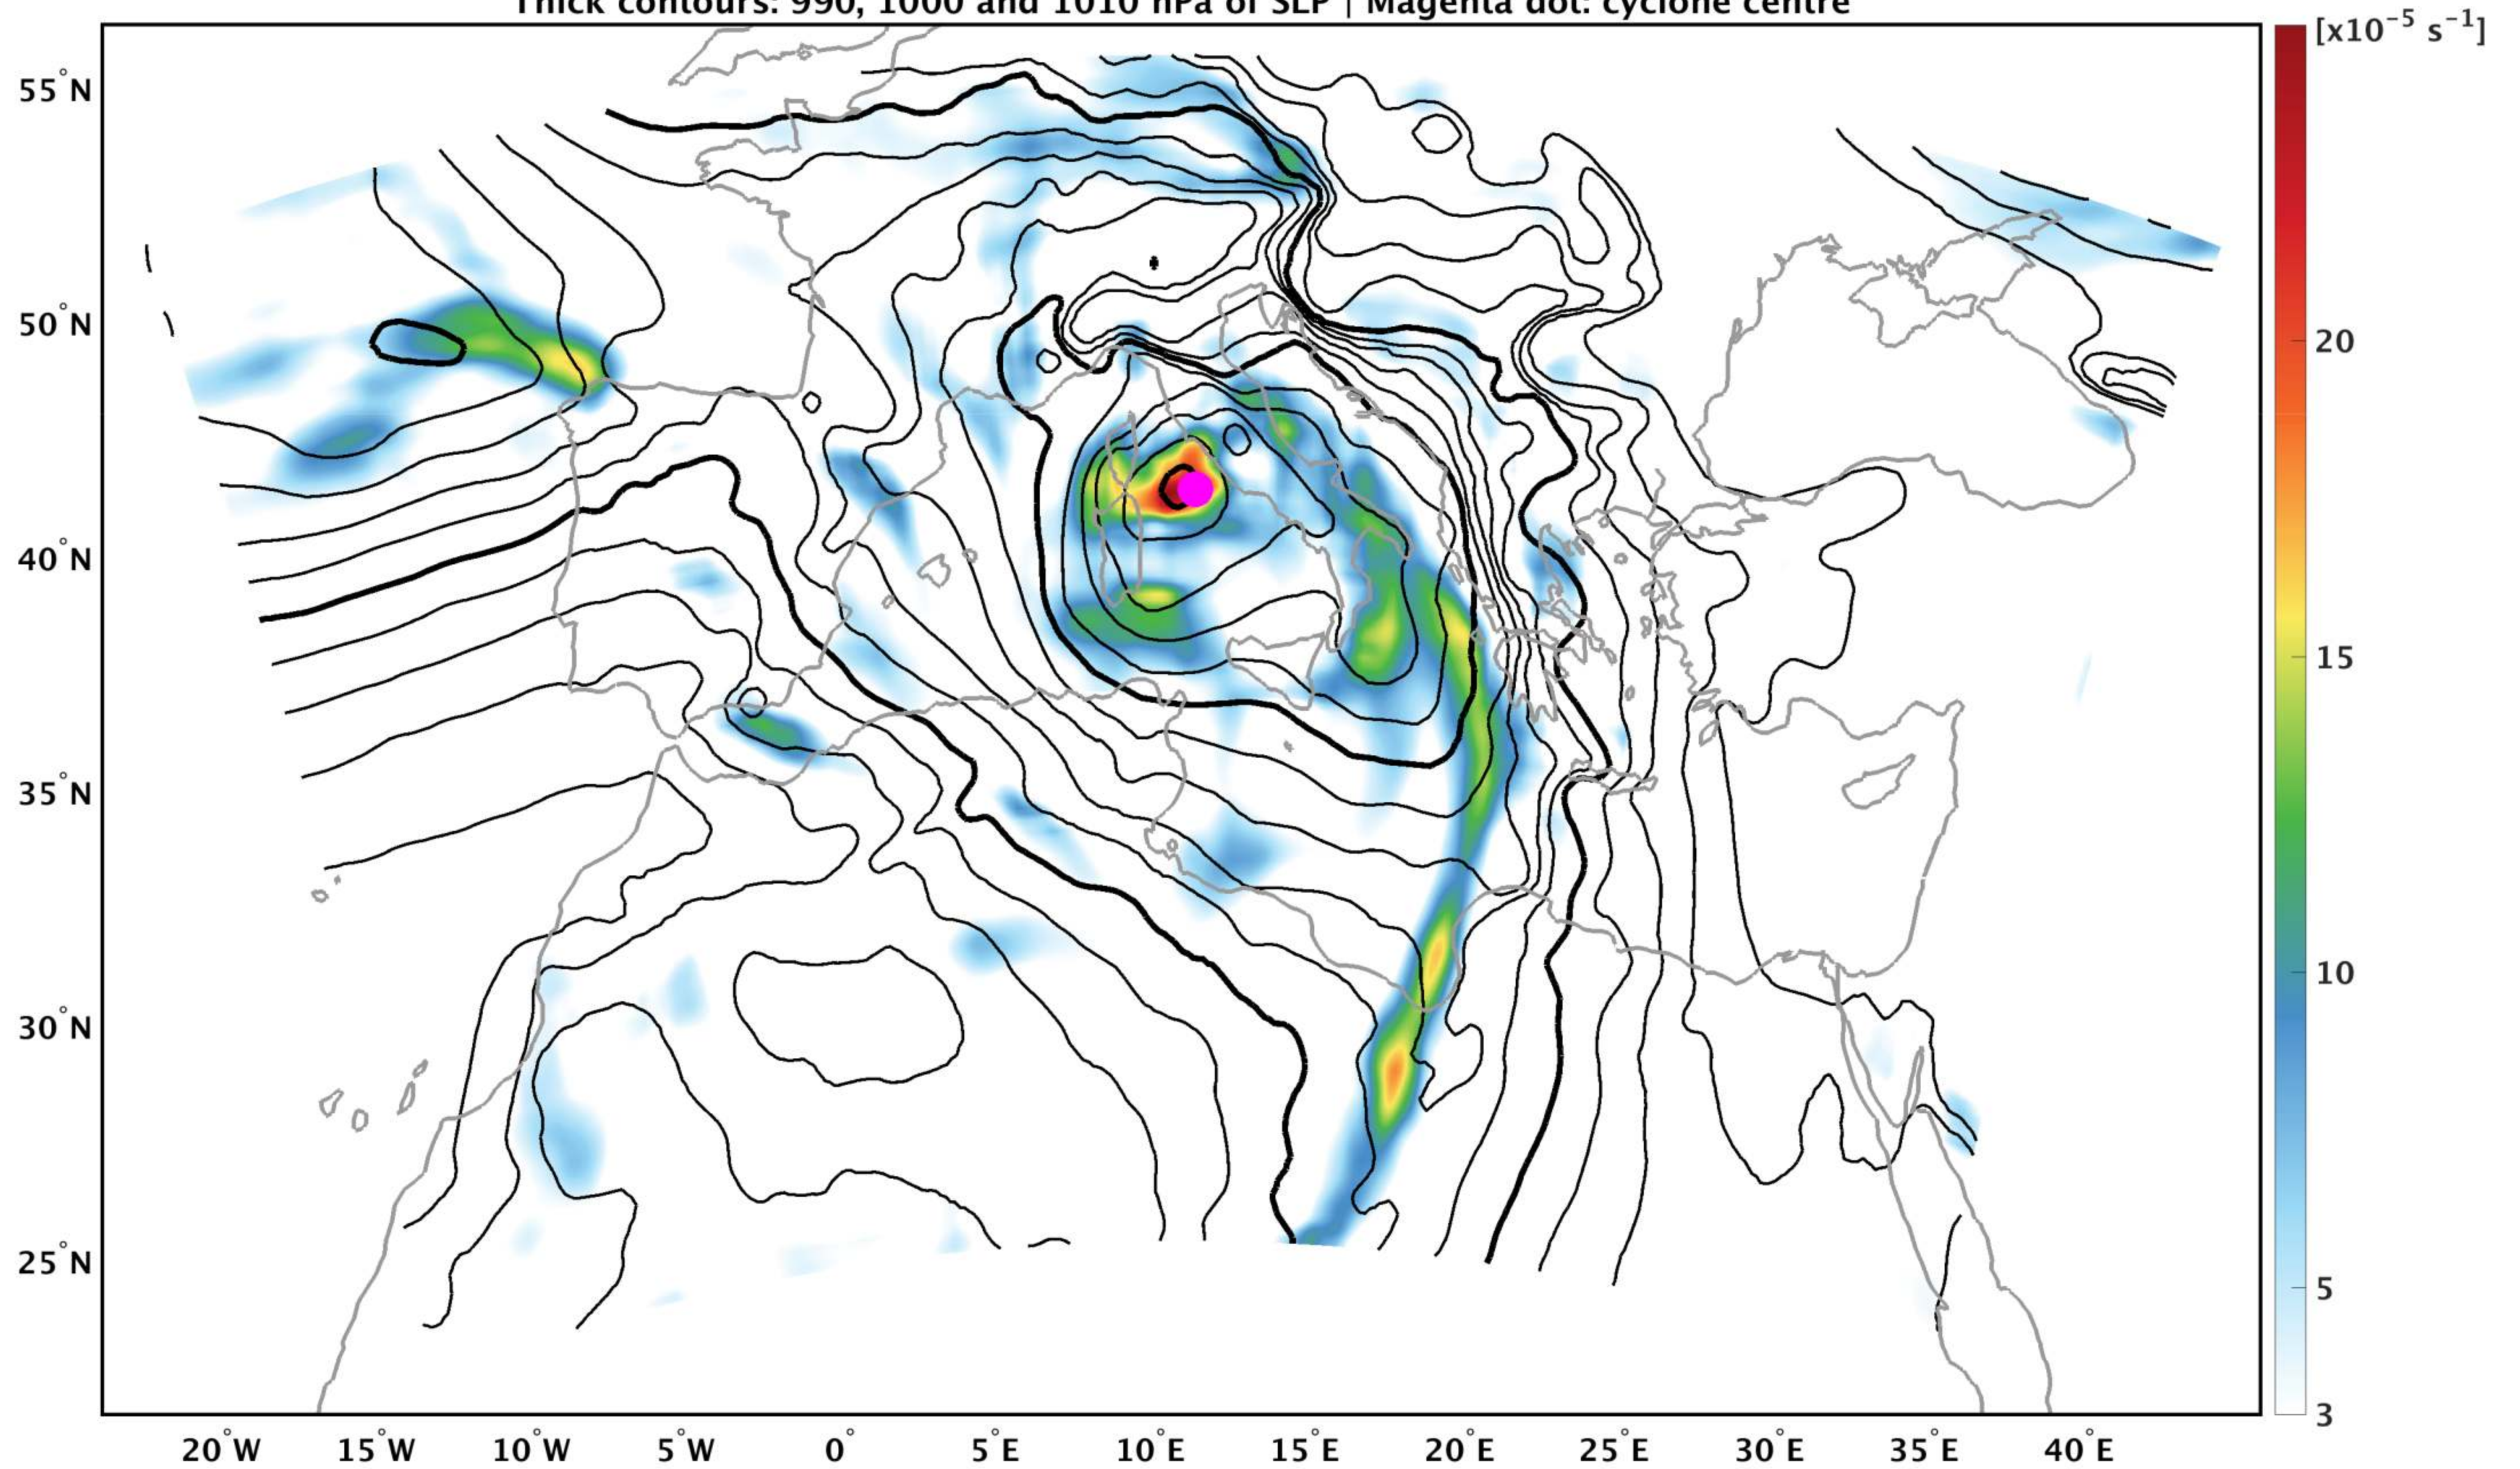

Supplement: Supplementary file 1 [file wcd-2-255-2021-supplement.pdf]
